# Supplementary material for: EEG Changes Due to Experimentally Induced 3G Mobile Phone Radiation
Source: PLoS One. 2015 Jun 8;10(6):e0129496. doi: 10.1371/journal.pone.0129496 (PMC4459698; doi:10.1371/journal.pone.0129496)
Supplement: S1 Excel — (XLS) [file pone.0129496.s001.xls]

## Sheet: Sheet1
ppn	meting	conditie	segment	oor_hart	PRE	EXPO	POST	moment_exposure	leeftijd	EOGlinks_sum_mean	EOGrechts_sum_mean	EOGlinks	EOGrechts	straling	deltaFz	thetaFz	alphaFz	slowbetaFz	fastbetaFz	gammaFz	deltaF3	thetaF3	alphaF3	slowbetaF3	fastbetaF3	gammaF3	deltaF4	thetaF4	alphaF4	slowbetaF4	fastbetaF4	gammaF4	deltaCz	thetaCz	alphaCz	slowbetaCz	fastbetaCz	gammaCz	deltaC3	thetaC3	alphaC3	slowbetaC3	fastbetaC3	gammaC3	deltaC4	thetaC4	alphaC4	slowbetaC4	fastbetaC4
1	0	0	0.037037	0	1	0	0	0	23	5.4276e+06	2.07593e+06	1.39742	-0.468203	0.969524	118.471	34.4774	6.59469	2.81845	2.56252	1.29258	110.896	32.1376	5.9087	2.67579	3.13564	1.75249	130.159	36.9761	6.33322	2.71749	2.41492	1.56414	61.4257	18.7873	5.92114	3.02966	4.32817	1.90187	49.0895	14.9982	4.57701	2.70119	3.69611	2.2189	52.7237	16.6296	4.93899	2.74494	2.95448
1	0	0	0.074074	0	1	0	0	0	23	3.04241e+06	1.96164e+06	-0.893707	-0.539831	0.985913	167.949	44.0896	9.01917	4.04361	2.53228	1.31022	181.696	46.0913	9.12777	4.25988	2.65824	1.93259	173.317	39.5501	8.00568	3.4883	2.4346	1.41145	73.543	22.0917	6.97569	4.07891	4.19956	1.90609	62.0542	18.9316	5.75086	3.91507	3.64437	2.29778	64.8	17.5613	5.53333	3.31373	3.12876
1	0	0	0.111111	0	1	0	0	0	23	4.61347e+06	1.94058e+06	0.771406	-0.518146	0.994228	127.119	36.8753	7.67766	3.93304	2.8498	1.34315	129.962	34.4205	6.98251	3.72025	3.17832	1.93836	140.103	39.1584	7.51912	3.89293	2.75295	1.49714	61.8708	22.3118	6.72975	3.99387	4.69615	1.88387	50.2615	16.3231	5.27592	4.11846	3.61698	2.23845	55.6166	19.9206	5.9984	3.99794	3.32283
1	0	0	0.148148	0	1	0	0	0	23	4.60059e+06	3.71842e+06	0.852524	1.30274	0.974575	110.217	30.2557	7.41342	3.98622	2.83475	1.43022	108.347	28.5957	6.73926	3.78544	3.20643	2.21863	112.564	29.0839	7.2757	3.87938	2.91932	1.84234	53.936	18.931	6.55252	4.22803	4.68636	2.0941	40.2199	15.0873	5.02403	3.61357	3.49746	2.4014	45.8759	15.5086	5.73651	4.0037	3.35278
1	0	0	0.185185	0	1	0	0	0	23	4.36539e+06	6.69265e+06	0.711418	4.3195	1.003	199.188	60.1778	15.6791	4.99162	3.71312	2.26976	196.362	60.8982	17.6888	9.92411	13.3381	13.6748	219.949	62.7632	16.2017	4.87256	5.09327	5.66925	87.3463	25.8753	9.32556	4.71697	5.42088	2.35735	71.5677	20.0401	7.95855	4.89032	4.43118	3.15926	80.2575	23.1068	8.67371	4.91132	4.31323
1	0	0	0.222222	0	1	0	0	0	23	5.14782e+06	3.13364e+06	1.58794	0.802984	1.0353	108.954	35.0981	9.93064	3.0033	2.07002	1.34254	111.516	33.4018	9.66984	5.35669	5.98382	7.06912	118.527	35.7828	9.46761	3.35303	2.89345	2.52874	53.7795	19.3437	7.10697	3.14078	3.21329	1.98155	44.6878	14.3912	5.69461	2.98142	2.80074	2.20457	47.7168	16.7558	5.91195	2.82161	2.51934
1	0	0	0.259259	0	1	0	0	0	23	4.9829e+06	2.88623e+06	1.51706	0.598382	1.03849	122.635	32.7973	7.43352	2.68643	2.47615	1.16423	125.121	30.7672	6.80002	4.33151	4.1004	5.39765	122.621	30.7292	6.63441	2.88308	2.83018	1.7858	65.3581	24.0928	6.09255	2.96663	4.30969	1.75344	50.7918	17.7485	5.12906	3.04169	2.66888	1.70465	54.5106	19.1408	4.9597	2.4215	2.91348
1	0	0	0.296296	0	1	0	0	0	23	2.47751e+06	2.79184e+06	-0.894358	0.547156	1.00663	94.9281	25.4848	5.90328	3.21258	2.58334	1.21277	109.191	27.4413	5.82299	4.92744	3.76064	4.12304	96.4257	23.5837	5.40891	3.09165	2.8562	2.02466	53.4697	19.1459	5.42351	3.58233	3.90859	1.81113	44.4589	15.0822	4.55697	3.34181	2.36628	1.61725	46.2572	15.7541	4.23272	3.12398	2.97071
1	0	0	0.333333	0	1	0	0	0	23	3.51885e+06	1.77443e+06	0.2411	-0.427803	1.04257	146.681	32.619	5.93267	3.26927	2.37945	1.05719	151.117	31.3954	6.83426	5.02513	4.29722	4.28689	152.143	32.2202	5.67363	3.50933	2.72079	1.86337	79.3243	19.4622	5.179	3.43857	3.80194	1.82002	64.6157	15.0795	4.32301	3.1293	2.51114	1.48948	70.5497	16.2757	4.24414	3.00408	2.5755
1	0	0	0.37037	0	1	0	0	0	23	3.62081e+06	1.33403e+06	0.43702	-0.825014	1.00902	107.413	35.526	9.50752	4.25989	2.69642	1.30482	106.007	31.4772	9.21265	6.0259	4.46887	4.43615	109.52	33.7534	8.15686	3.82391	3.02929	1.96798	53.0767	24.3634	8.82898	4.37923	4.07458	1.8538	42.4961	18.6539	8.30007	3.99418	2.77615	1.44767	45.8648	20.8605	8.4007	3.79553	2.84845
1	0	0	0.407407	0	1	0	0	0	23	3.41507e+06	955514	0.325279	-1.1605	0.989204	109.408	25.5592	8.76332	3.17534	2.61487	1.24867	123.535	25.2861	8.33433	3.72419	5.81064	4.31713	110.238	23.5985	7.6782	3.30834	2.90644	2.08763	58.9046	18.0714	7.23099	3.0411	4.16314	1.71272	47.1345	14.0604	5.72967	2.59916	2.465	1.43057	51.7093	14.6714	5.51628	2.52945	2.59258
1	0	0	0.444444	0	1	0	0	0	23	2.54933e+06	1.30905e+06	-0.446372	-0.764405	1.01635	119.319	25.3544	6.06482	3.12482	2.49989	1.36513	128.587	28.5199	5.81594	4.04687	4.14625	4.32903	113.377	22.1706	5.54494	3.65924	2.77125	2.30354	61.3351	17.7295	5.9992	3.51956	3.98311	1.8391	53.2304	15.4666	5.0342	2.94021	2.46757	1.65124	51.5339	13.4095	4.93303	3.18382	2.6632
1	0	0	0.481481	0	1	0	0	0	23	1.18376e+06	889646	-1.71792	-1.14093	1.01153	106.964	26.4846	6.9505	3.39147	2.50629	0.99521	105.103	25.1489	6.47958	4.32586	3.97013	3.12315	110.466	25.1087	6.68382	3.56566	2.93955	1.88624	55.6135	16.9746	6.25753	3.41859	3.602	1.73717	44.3823	13.1401	4.92836	3.07453	2.43018	1.43102	50.3075	14.0543	4.90386	2.91478	2.72316
1	0	0	0.518519	0	1	0	0	0	23	2.87004e+06	4.16704e+06	0.062388	2.17932	1.00861	130.182	23.9874	6.1189	3.83786	3.18174	0.96811	114.297	21.5066	5.86904	4.50438	4.60295	3.37245	154.935	25.6647	5.57886	4.05326	3.6234	1.83702	67.922	15.754	5.63383	4.07918	4.4478	1.51708	51.0088	11.4989	4.43189	3.21176	2.80512	1.32658	69.7856	13.9064	4.53249	3.38749	3.06396
1	0	0	0.555556	0	1	0	0	0	23	2.73243e+06	1.10786e+06	0.018779	-0.836835	0.990705	152.865	34.5652	10.3848	3.79786	3.16547	0.93878	127.13	29.8709	8.23227	4.45392	4.71696	3.50797	170.416	32.9858	8.76697	4.31234	3.80458	1.92271	79.2173	24.9746	10.5846	4.37796	5.04735	1.53972	57.711	17.944	8.14035	3.68232	3.15213	1.32289	78.245	20.2078	7.34916	4.1771	3.43286
1	0	0	0.592593	0	1	0	0	0	23	2.1724e+06	656990	-0.44722	-1.24486	0.989276	114.475	21.9402	5.68355	2.84647	2.84654	1.00143	100.854	20.585	5.6874	3.63805	4.37151	3.91216	127.396	21.9149	5.25924	3.20658	3.19202	2.05509	63.4379	14.3112	5.46181	3.06645	4.3336	1.58199	45.3707	11.0812	4.1517	2.87149	2.73995	1.34366	59.4758	12.8573	4.57362	2.84674	2.87526
1	0	0	0.62963	0	1	0	0	0	23	1.54681e+06	1.1874e+06	-0.978819	-0.671384	0.967644	121.106	22.2524	7.00453	2.87805	3.1401	1.00924	127.181	23.1453	6.98091	4.12073	4.89234	3.57536	121.456	19.1743	6.06811	3.19376	3.52754	1.99897	69.2683	16.2567	6.30731	2.80029	5.03146	1.59107	54.6851	12.8637	4.97947	2.66739	2.99886	1.27571	60.8324	12.8798	4.79395	2.57614	3.40574
1	0	0	0.666667	0	1	0	0	0	23	1.75844e+06	1.61496e+06	-0.673037	-0.20161	1.02664	89.1325	17.9966	5.54412	3.19931	2.70947	1.12121	89.6882	16.8859	5.81538	4.86618	5.12351	4.78675	98.4858	17.4822	4.84459	3.1834	3.45232	2.28494	47.7693	12.7354	5.23081	3.14007	4.17929	1.68331	37.8035	9.95826	4.4658	2.94131	2.61158	1.48994	47.0838	10.7433	4.49046	2.38621	2.77467
1	0	0	0.703704	0	1	0	0	0	23	2.53739e+06	1.02252e+06	0.199877	-0.750845	0.990599	104.041	22.3032	6.3473	3.6888	2.70393	0.97634	93.7532	19.6627	5.4468	4.46391	4.22475	3.86086	103.442	21.1575	6.20341	4.18026	3.67167	2.09131	61.3156	16.6989	5.95207	3.63019	3.70864	1.54926	44.2756	12.0175	4.33435	2.68739	2.41941	1.27129	52.0596	14.1264	5.54895	3.59895	2.67262
1	0	0	0.740741	0	1	0	0	0	23	1.67866e+06	947421	-0.564794	-0.783218	1.001	156.44	30.9087	6.46011	3.37799	2.78851	1.06151	184.968	34.5723	6.31428	4.27835	6.36767	4.72661	140.253	27.5218	5.69108	3.48266	3.96615	2.16007	68.9463	17.5715	5.37556	3.29414	4.49896	1.46368	61.045	14.1547	3.93193	2.70209	2.84687	1.24034	56.6661	14.1151	4.46334	2.50464	3.12409
1	0	0	0.777778	0	1	0	0	0	23	1.88746e+06	919140	-0.262017	-0.768401	0.975533	159.624	30.4519	7.13082	3.80286	2.72886	1.01772	164.248	28.4672	6.5932	5.46409	5.55604	4.35011	161.446	25.5841	6.85051	4.08998	3.75887	2.14442	80.7149	20.486	6.53701	4.1496	4.00562	1.69834	68.3648	15.457	5.15471	3.4807	2.696	1.46601	68.2983	16.3477	5.41502	3.46764	3.02735
1	0	0	0.814815	0	1	0	0	0	23	1.82269e+06	1.05574e+06	-0.232626	-0.589588	1.03489	151.806	32.8916	8.94557	4.32497	2.72153	1.00232	159.904	29.5021	8.43784	5.35732	5.19808	4.04006	143.982	29.8742	8.00294	4.47402	3.47058	2.16814	70.9363	18.435	8.16639	4.49627	4.08059	1.58426	65.433	13.5563	6.76102	4.05043	2.81546	1.33021	61.2969	15.5486	6.70151	4.14853	2.82085
1	0	0	0.851852	0	1	0	0	0	23	1.39273e+06	1.41418e+06	-0.568788	-0.187114	0.919533	95.3881	19.7477	6.50898	3.26505	2.8513	0.89357	96.0277	17.7058	5.42634	4.22395	5.04368	3.24017	95.1623	17.8703	5.93912	3.56737	3.54262	1.84201	58.7338	15.5317	6.48661	2.87084	4.12015	1.57679	46.3844	11.5013	4.67511	2.47902	2.75193	1.25085	51.7373	12.996	5.38416	2.90024	3.49824
1	0	0	0.888889	0	1	0	0	0	23	1.4707e+06	2.93729e+06	-0.396595	1.37785	1.01351	133.675	29.2986	7.00555	4.07501	3.10994	1.12109	131.337	27.5936	6.05603	4.75085	5.65504	4.20285	141.951	25.3087	6.8369	4.13004	3.52973	2.31724	77.1806	21.6181	6.79685	4.1971	4.22505	1.76627	61.4252	17.5866	5.03241	3.75963	3.05445	1.53843	72.7221	16.3011	6.22947	3.80312	2.646
1	0	0	0.925926	0	1	0	0	0	23	2.14655e+06	3.38685e+06	0.373241	1.87048	0.990331	121.563	27.5424	7.10239	3.68488	2.82674	1.00133	118.85	25.5504	6.54256	4.63699	5.27524	3.83203	134.965	24.8838	6.26798	4.67213	3.68375	2.28739	68.2927	19.3378	6.89196	3.69414	4.169	1.52318	55.0212	16.2066	5.17766	3.08806	2.91056	1.309	60.1004	15.8721	5.71682	3.66589	3.16186
1	0	0	0.962963	0	1	0	0	0	23	1.82021e+06	1.0094e+06	0.140875	-0.463809	0.959616	109.15	29.0905	6.4296	3.60993	3.08616	1.03973	109.376	27.7295	6.37119	4.46224	4.96421	3.82373	126.036	26.4199	6.2628	3.99165	3.74022	2.26666	50.7538	18.1969	6.00314	3.65353	4.44778	1.38845	40.937	13.7574	4.97552	3.29893	3.04425	1.47144	52.2856	15.924	4.94238	3.1987	3.14136
1	0	0	1	0	1	0	0	0	23	1.96452e+06	1.35236e+06	0.379204	-0.077957	0.953399	120.948	32.1861	7.97186	3.84868	2.38844	0.87971	119.207	28.6429	7.09087	4.87135	4.22231	2.83683	121.997	28.7488	6.78629	3.91227	3.30466	2.09029	62.3278	24.2881	6.28607	3.95797	3.71984	1.31285	52.0536	17.427	4.93735	3.61872	2.23664	1.2488	52.7848	18.7493	5.32152	3.40607	2.50018
1	0	1	0.037037	0	0	1	0	0	23	1.70656e+06	1.47586e+06	0.258101	0.255235	2.27892	104.695	27.6519	7.50408	2.70528	2.83661	1.1841	110.281	28.4702	7.03474	2.69491	2.862	1.679	120.219	26.4762	6.75129	2.51234	2.45154	1.22315	55.7765	17.9808	6.54913	2.95713	4.54394	1.70586	45.1876	15.11	5.07478	2.66104	3.0665	1.83951	53.8483	14.4035	5.19241	2.49512	3.3408
1	0	1	0.074074	0	0	1	0	0	23	1.2339e+06	1.48948e+06	-0.21713	0.289746	1.21955	99.9229	23.8028	9.2954	4.16405	2.59994	1.31048	108.099	23.5803	8.0721	4.74877	3.26891	2.94751	101.901	23.633	8.64174	4.17871	2.53513	1.57006	56.4335	17.5419	8.75342	4.52617	4.1293	1.8348	51.8778	13.4775	6.81303	4.85367	3.19595	1.76471	50.0945	16.2293	7.33151	3.99104	3.07759
1	0	1	0.111111	0	0	1	0	0	23	1.42862e+06	1.16727e+06	-0.022189	-0.02572	1.51812	109.933	26.2098	7.30621	3.34289	2.95827	1.18096	108.12	28.6198	7.25282	3.91274	3.96655	3.13887	113.85	21.6422	6.13772	3.41984	3.26434	1.9053	56.5358	16.526	6.77465	3.82636	4.45565	1.68013	44.0368	15.4887	5.8436	3.31985	3.08677	1.60342	51.2951	11.5892	5.1723	3.34	3.25733
1	0	1	0.148148	0	0	1	0	0	23	1.29841e+06	761884	-0.152648	-0.421989	1.5888	107.407	24.8822	6.35272	3.02323	2.78358	0.99322	110.09	22.1013	6.26516	3.60018	3.88209	3.40157	102.503	21.3398	5.50901	3.45747	3.32091	2.01105	56.3262	20.0289	5.94871	3.04691	4.32322	1.55192	44.1129	15.4172	4.66888	2.75036	2.99185	1.51346	47.6877	15.1186	4.67221	2.94215	3.36735
1	0	1	0.185185	0	0	1	0	0	23	1.14085e+06	875545	-0.31075	-0.297689	1.51366	126.686	29.1617	6.36974	3.60185	2.75763	0.9311	118.976	25.3937	6.66365	4.66973	4.62006	4.29342	134.906	26.6965	5.6743	4.10493	3.74698	2.3553	69.1769	20.7359	6.6892	4.04731	4.4174	1.55264	55.3392	15.6515	5.23799	3.35047	3.23931	1.39121	66.4407	16.8358	4.97245	3.51418	3.2533
1	0	1	0.222222	0	0	1	0	0	23	1.12986e+06	930851	-0.322119	-0.232581	1.5188	105.41	23.1011	5.74336	3.2322	3.03414	0.9993	104.353	20.4049	5.58409	4.37272	4.7174	4.25866	121.899	20.4797	5.32466	3.86395	3.85851	2.67326	53.6351	17.204	6.21041	3.36392	4.49326	1.49674	45.4187	13.3194	5.29626	2.98488	2.76739	1.46974	52.255	14.3165	5.04162	3.31377	3.11539
1	0	1	0.259259	0	0	1	0	0	23	1.24355e+06	804733	-0.209109	-0.347408	1.38109	143.957	22.809	6.81442	4.15869	3.23847	0.9822	137.669	20.1947	6.70641	5.81911	5.8264	5.31441	144.336	20.5278	6.01483	4.37439	4.50751	3.17436	85.6258	18.5418	7.07483	4.33671	4.82569	1.45125	72.4942	13.7406	5.8208	3.80588	3.36895	1.36098	73.84	15.6943	5.94415	3.92078	3.31783
1	0	1	0.296296	0	0	1	0	0	23	1.40953e+06	835071	-0.04281	-0.310838	1.72902	96.5454	22.4339	5.84167	3.45448	3.00419	1.07426	102.627	19.643	5.83477	5.02744	5.50848	4.94642	95.0034	17.09	5.13429	4.44044	4.32322	3.29001	54.1355	18.7527	6.63338	3.5117	4.76136	1.68419	43.0551	14.6948	5.44522	3.29553	3.04294	1.41352	48.038	14.5708	5.40141	3.69798	3.25962
1	0	1	0.333333	0	0	1	0	0	23	1.06641e+06	813492	-0.387363	-0.317308	1.22468	103.723	23.58	5.72469	3.31927	3.24454	0.95417	94.5606	21.6593	6.15531	5.25906	6.192	5.09108	115.314	21.8011	5.12335	4.48589	4.70277	3.42856	64.734	18.4022	5.93944	3.50064	4.37323	1.52235	45.6547	14.6964	4.89151	3.30779	2.97347	1.38649	62.6467	15.4606	4.72582	3.36019	3.26929
1	0	1	0.37037	0	0	1	0	0	23	1.271e+06	1.31408e+06	-0.182139	0.187968	1.72108	126.314	25.2345	6.4076	3.37626	2.7218	1.20639	115.359	22.9047	6.90151	5.9208	6.67223	6.72265	137.747	24.9823	6.43397	4.65348	5.15374	4.13193	77.5015	16.1231	6.60606	3.70192	3.851	1.69591	61.239	11.7777	5.04632	3.36226	2.61067	1.70499	69.2331	14.1435	5.6716	3.48644	3.14644
1	0	1	0.407407	0	0	1	0	0	23	1.6038e+06	898147	0.149171	-0.212541	1.1863	135.463	30.2093	7.1376	3.35849	2.73994	1.08881	148.899	30.5434	7.01477	5.41448	5.62696	5.1187	139.738	27.1932	6.63177	4.2763	5.07389	3.42816	62.9827	18.6397	6.58955	3.75807	4.60739	1.50413	56.4657	14.7182	5.225	3.41529	3.05171	1.49553	56.3272	14.9753	5.2323	3.26669	3.43768
1	0	1	0.444444	0	0	1	0	0	23	2.1384e+06	1.28218e+06	0.683681	0.179807	1.33417	149.6	30.6341	6.50739	3.53713	2.46046	1.14397	135.467	28.2961	6.02516	5.06539	5.73351	5.73892	174.133	26.7766	5.94945	4.94676	5.70806	4.46952	62.3195	20.5067	6.4262	3.90589	3.76312	1.63576	46.4172	16.1101	4.76315	3.64706	2.63259	1.55511	64.6861	15.6599	5.03173	3.41658	3.04259
1	0	1	0.481481	0	0	1	0	0	23	1.62098e+06	622837	0.165743	-0.469064	1.27507	140.464	22.8446	5.39703	3.50909	2.76828	1.02196	135.765	20.5691	5.33267	6.52623	7.27609	7.8701	135.448	18.9649	4.71327	4.58244	6.55873	5.07767	82.9972	18.3396	5.50041	3.76957	4.7577	1.46584	68.2813	14.6652	4.19723	3.57597	3.06378	1.48317	73.247	14.39	4.3194	2.96153	3.4173
1	0	1	0.518519	0	0	1	0	0	23	1.34153e+06	1.30071e+06	-0.109069	0.193246	3.71516	155.42	29.1577	7.75612	4.77567	3.86506	2.32841	151.402	27.5846	7.00631	7.79152	9.17441	13.2065	157.59	25.4571	6.67253	5.69726	5.60984	4.69114	74.2469	21.4984	8.13695	5.34927	5.80824	3.06574	57.9979	17.0241	7.73051	7.46366	8.79946	11.2674	63.9642	17.4279	6.58667	4.39231	3.46011
1	0	1	0.555556	0	0	1	0	0	23	1.236e+06	1.17918e+06	-0.22001	0.106931	1.28049	179.385	26.9091	7.45075	3.91509	2.59857	1.05404	171.574	24.5823	7.2614	5.97398	8.15654	7.59935	173.049	22.7177	7.31713	5.00884	5.93612	4.59145	87.0569	19.7045	6.42128	4.3497	4.02451	1.46177	70.0485	15.7156	5.14851	4.01763	2.66578	1.48908	77.7974	16.2886	5.62735	3.39027	3.04208
1	0	1	0.592593	0	0	1	0	0	23	1.58159e+06	1.17281e+06	0.12475	0.112669	1.06505	185.967	30.7083	6.76654	3.35421	2.75672	1.26372	168.659	27.1356	6.5156	6.43864	8.06944	7.92615	196.933	27.5876	6.22747	4.60462	5.63706	4.49705	85.7964	19.6811	6.4828	3.8203	4.20523	1.57302	67.0301	15.4124	5.08434	2.85633	2.80513	1.58467	79.8045	15.3016	5.2841	3.31445	2.98582
1	0	1	0.62963	0	0	1	0	0	23	1.49185e+06	826300	0.037086	-0.236479	2.26423	157.742	30.2013	7.30687	3.6792	3.31694	2.71767	150.484	28.6127	8.245	5.77206	9.20318	9.90295	166.29	28.5558	6.70613	5.10178	6.33884	6.68523	83.0087	20.4445	6.62968	3.96485	4.50055	3.06931	59.0703	16.9903	6.34191	3.8358	4.57248	6.59946	74.1225	16.7868	5.51621	3.92168	4.45667
1	0	1	0.666667	0	0	1	0	0	23	821449	800739	-0.635862	-0.241301	1.21931	144.522	24.9407	6.52054	3.25104	2.63877	1.03446	142.601	22.3248	6.20111	5.37156	8.71807	7.51257	147.424	21.2575	5.61304	4.36202	5.23127	4.50825	78.3647	19.2761	5.9295	3.14902	4.03648	1.30274	57.4308	15.5401	4.81572	2.86355	2.5575	1.30059	69.1468	15.3165	4.58308	2.96595	2.80568
1	0	1	0.703704	0	0	1	0	0	23	1.21215e+06	990569	-0.245732	-0.040707	1.13211	174.136	31.0771	6.49853	3.43982	2.72777	1.18912	178.636	28.7255	6.62222	5.42141	10.6314	10.1537	176.926	27.7444	5.88159	5.0742	7.20146	6.04647	77.5195	20.1646	6.03461	3.85619	4.09668	1.40134	60.9592	16.2967	5.10309	3.37538	2.6541	1.31084	64.9438	15.873	4.50002	3.28942	3.09099
1	0	1	0.740741	0	0	1	0	0	23	1.64929e+06	913037	0.19086	-0.107592	1.0562	155.69	30.1911	7.14708	4.22834	2.6592	1.22002	160.947	28.3579	6.29343	6.49198	14.6556	11.3438	159.301	26.2706	6.89449	5.76684	7.43897	6.75121	73.9167	22.968	6.6512	4.16035	4.03881	1.54924	64.0448	17.622	5.66669	3.8677	2.80378	1.52863	65.532	17.2182	5.10474	3.74446	3.25893
1	0	1	0.777778	0	0	1	0	0	23	1.21096e+06	744735	-0.247798	-0.266387	1.0897	187.121	31.2904	9.00742	5.0873	2.96202	1.36401	196.363	29.3201	7.84009	8.20722	12.1635	11.4798	192.935	27.2794	8.12596	7.31528	7.48241	6.51344	74.3311	22.0343	7.82976	5.09653	4.91984	1.67191	61.9921	17.0547	6.40354	4.05605	3.19672	1.66153	66.7073	18.2245	6.44613	4.67087	3.53668
1	0	1	0.814815	0	0	1	0	0	23	1.36143e+06	1.21156e+06	-0.097656	0.209984	1.119	131.557	27.4864	7.2691	3.93612	2.5957	1.09743	138.287	27.0421	6.11327	5.87242	15.4209	11.0928	136.619	27.3679	7.28157	5.83339	7.84727	6.64043	52.5742	17.4257	6.63404	4.19383	3.71415	1.45481	42.4089	14.4538	5.203	3.5156	2.93563	1.39167	48.314	14.3181	6.53986	3.82217	2.93555
1	0	1	0.851852	0	0	1	0	0	23	1.07332e+06	1.03577e+06	-0.382784	0.026981	2.75806	125.861	24.9457	8.46188	4.06979	2.57275	1.09577	130.096	24.2053	7.62278	7.15637	15.1837	10.6552	133.192	23.9121	7.13287	6.08251	7.1978	5.41874	65.1406	18.814	7.44747	4.63999	3.94979	1.62831	53.1825	15.6293	5.7778	3.65788	2.77642	1.39353	59.5701	15.7594	5.80963	4.51199	2.87231
1	0	1	0.888889	0	0	1	0	0	23	1.48814e+06	734028	0.033292	-0.273222	3.55683	186.886	26.4437	6.92406	3.4985	2.75153	1.01136	181.614	25.268	6.59054	6.99513	13.8034	12.2684	193.151	23.9505	5.72473	5.26298	8.28044	5.47378	83.8723	18.1495	7.35937	3.66678	4.43751	1.39886	65.7097	14.5324	5.79086	3.14457	2.76973	1.40563	77.0597	14.3933	5.47326	3.31383	3.34602
1	0	1	0.925926	0	0	1	0	0	23	2.24823e+06	1.65894e+06	0.787891	0.687321	1.08213	176.483	40.8559	10.5842	4.29123	4.7824	3.32291	166.175	38.9097	10.4556	7.65724	15.1245	16.7955	196.443	40.1374	10.2529	5.99608	9.00307	7.61872	90.2077	26.516	9.86072	4.59733	6.54454	3.98703	70.7826	21.8588	9.98416	5.97015	10.708	11.1677	84.7977	22.1302	8.47684	4.11987	5.39149
1	0	1	0.962963	0	0	1	0	0	23	1.44522e+06	749034	-0.015255	-0.214022	1.20628	198.175	37.4199	6.26413	3.32974	2.54567	1.09299	203.635	34.8692	6.3862	6.2387	8.0158	7.67907	204.182	34.1608	5.48747	4.52094	5.72846	4.8263	79.1026	22.7787	4.96277	3.66341	4.65308	1.42467	65.5655	16.8506	4.27278	2.99119	2.81339	1.54349	74.7686	18.922	3.85409	3.54109	3.08615
1	0	1	1	0	0	1	0	0	23	1.74751e+06	1.34889e+06	0.286643	0.395658	1.20931	164.202	34.6157	7.71214	3.55171	3.29422	2.03101	153.697	30.1545	7.49394	7.17037	15.9695	15.4491	174.699	35.0537	7.31228	5.50864	8.66338	6.25657	71.6063	21.7931	6.52712	3.86122	4.68725	2.53559	53.3676	15.8772	5.34082	4.9816	6.40692	5.99729	64.9967	18.0827	5.19521	3.6409	3.6534
1	0	2	0.037037	0	0	0	1	0	23	1.22135e+06	1.19587e+06	-0.30848	0.060254	0.905426	112.931	30.7158	7.38931	3.21496	2.86535	1.43538	112.206	29.6801	7.45975	3.37624	3.24433	3.00311	127.838	30.4604	6.62897	3.42755	2.74066	1.81524	59.2373	17.8061	6.25183	3.49992	4.00343	2.06342	46.8921	14.3073	5.99725	3.22556	3.36057	3.44682	57.604	15.8848	4.67758	3.05143	2.73965
1	0	2	0.074074	0	0	0	1	0	23	784554	760910	-0.743743	-0.362614	0.956535	183.467	32.5897	6.43411	4.07305	2.48143	0.88334	181.511	31.0409	6.05999	3.83414	2.64914	1.5819	178.078	31.0727	5.32062	4.27418	2.85479	1.49921	91.9094	20.7046	6.54159	4.17248	3.51156	1.4115	73.7956	15.8406	5.48945	3.05052	2.36573	1.13209	78.6543	16.9664	5.00894	3.85075	2.85097
1	0	2	0.111111	0	0	0	1	0	23	1.35558e+06	848778	-0.171295	-0.262082	0.952487	119.821	31.5542	9.15565	4.01098	2.46709	0.90473	128.085	28.9615	7.85148	4.26697	3.24304	1.84969	130.624	31.8013	8.1815	4.06698	2.85878	1.69176	50.5744	20.6026	9.42238	4.04076	3.69371	1.52804	46.4282	15.7951	7.70587	3.2627	2.53359	1.22434	47.7956	17.8467	7.53219	3.76689	3.00464
1	0	2	0.148148	0	0	0	1	0	23	2.22253e+06	1.25553e+06	0.697097	0.157179	0.963426	125.547	36.9216	8.25809	2.9237	2.41485	1.04843	111.029	32.6374	7.51231	3.07376	3.15929	2.3461	140.975	35.9769	7.88798	3.14027	3.27254	1.95376	60.306	22.385	7.94103	3.17336	3.74778	1.55502	44.5098	17.0323	6.67726	2.67631	2.5346	1.32877	58.3531	18.8284	6.15451	2.6902	2.56181
1	0	2	0.185185	0	0	0	1	0	23	1.35754e+06	682252	-0.166398	-0.403778	0.992162	126.372	31.1513	7.19987	3.68313	2.70615	0.86838	113.112	28.9455	6.50315	3.78959	3.15501	1.79652	137.456	31.7704	6.81197	3.87802	3.25762	1.6674	60.5332	18.2465	6.24739	3.92407	3.93296	1.41833	44.883	13.995	4.70168	3.14315	2.54734	1.138	56.2123	16.0587	5.39616	3.66319	3.1328
1	0	2	0.222222	0	0	0	1	0	23	985158	845641	-0.537455	-0.227272	0.944635	144.858	37.7554	6.56454	3.07933	2.83303	0.91282	148.71	36.6853	6.44969	3.23479	3.29895	1.92525	157.538	38.0426	6.01539	3.30596	3.29476	1.65526	63.8828	20.6871	5.0053	3.14863	4.12803	1.41005	52.3829	15.9371	4.39254	2.51506	2.7236	1.20003	58.8223	17.403	4.16569	2.83834	3.07455
1	0	2	0.259259	0	0	0	1	0	23	1.44738e+06	1.31567e+06	-0.073837	0.255524	0.931183	146.888	40.7587	8.68485	4.73713	4.29559	2.29187	152.922	40.869	8.68499	7.36307	7.45068	5.9197	156.564	38.6443	8.60543	4.84899	5.18895	3.85824	69.6782	21.2098	6.58152	4.74599	5.81922	2.65349	55.141	17.0368	5.79528	7.0174	6.97315	4.87027	61.5812	17.5034	5.25538	4.06306	4.73924
1	0	2	0.296296	0	0	0	1	0	23	1.22903e+06	834581	-0.290784	-0.21282	0.918901	108.99	29.1108	7.9745	3.92897	2.60497	0.95373	98.9313	26.3851	7.41037	4.51993	3.84376	2.76934	131.335	27.4971	7.06652	3.81877	3.58093	1.90787	56.6534	21.2171	7.30848	4.38589	4.52055	1.34403	41.4352	17.2706	5.7759	4.30884	2.66179	1.26042	54.4573	16.7526	6.03566	3.61737	2.98948
1	0	2	0.333333	0	0	0	1	0	23	1.93253e+06	1.16208e+06	0.414106	0.127525	0.897684	156.768	37.2132	8.35716	4.17037	3.95365	2.41696	162.176	35.6437	7.2564	4.57106	5.04485	4.94848	169.615	36.3806	7.75365	4.724	6.10102	4.7355	74.2165	22.5539	7.74522	4.30324	5.45232	2.88061	61.9244	18.0852	6.05126	3.80725	3.3327	2.65591	71.8839	18.9746	6.72207	4.60387	5.74917
1	0	2	0.37037	0	0	0	1	0	23	1.13539e+06	762876	-0.381551	-0.259387	0.928967	189.559	36.4452	7.54583	3.93095	2.55112	0.97433	192.841	35.0505	7.85087	4.30556	3.87389	2.75462	196.592	35.927	6.68785	4.47356	3.63092	2.32618	85.0299	20.971	6.51329	4.00817	3.87489	1.48203	71.0922	16.9402	5.74234	3.55948	2.72687	1.22663	75.7905	17.655	4.98534	3.80277	2.88104
1	0	2	0.407407	0	0	0	1	0	23	1.68185e+06	842826	0.166355	-0.166903	0.937404	182.794	37.3525	6.80176	3.34754	2.71168	1.06474	167.578	37.0497	6.33313	3.35632	3.77502	3.08346	207.741	36.0708	6.18655	3.78215	3.39963	2.07025	76.2046	23.1017	6.27643	3.77578	4.77836	1.56565	58.2981	18.3715	5.21058	3.11509	2.6163	1.27772	75.1861	19.2076	5.16591	3.47848	3.00231
1	0	2	0.444444	0	0	0	1	0	23	1.92353e+06	1.10803e+06	0.409479	0.110838	0.945368	131.581	28.6432	8.12759	3.69809	2.36044	1.13422	122.089	26.8008	7.16211	4.67763	9.53962	7.37816	149.883	27.5917	8.33913	4.4089	4.34111	3.86782	59.3362	16.4286	7.25476	3.79894	3.63926	1.56801	43.1045	13.0676	5.67215	3.08484	2.36964	1.37783	60.8385	14.0514	6.41864	3.28013	2.47198
1	0	2	0.481481	0	0	0	1	0	23	1.81907e+06	760684	0.306456	-0.223929	0.949669	123.62	35.2046	9.16324	3.49047	2.95446	0.84397	122.631	31.2303	7.96902	5.77824	9.97833	8.61175	139.008	32.6926	7.85504	5.0284	5.31165	3.94251	54.9385	21.5866	7.65413	3.87345	4.3574	1.39523	45.2435	16.6588	5.8848	3.21326	2.85629	1.21079	52.5906	17.596	5.78388	3.65123	3.25103
1	0	2	0.518519	0	0	0	1	0	23	1.52457e+06	673735	0.013369	-0.29816	0.940376	132.679	23.587	5.39437	3.23047	2.43849	0.95843	159.317	23.3165	5.64886	6.53604	10.1735	8.94767	126.175	22.5779	5.11945	4.41759	4.88926	3.73115	63.7926	17.8437	4.91781	3.59273	3.75779	1.36632	59.7927	13.3629	4.47975	3.1212	2.69765	1.24473	52.4808	14.415	4.0573	3.05567	2.91551
1	0	2	0.555556	0	0	0	1	0	23	1.65693e+06	1.02655e+06	0.147001	0.068042	0.86744	186.149	38.2668	7.84854	3.76636	2.89236	1.34932	162.367	32.2084	6.38928	6.59694	12.2958	11.7214	203.047	38.4536	7.22993	5.11045	5.95509	4.13396	91.1884	24.4133	7.06148	4.0924	4.58216	1.76956	62.6791	18.5128	5.69284	3.82191	3.50698	2.85668	83.0108	21.145	5.84674	3.88087	3.24304
1	0	2	0.592593	0	0	0	1	0	23	1.80348e+06	1.20454e+06	0.295078	0.258137	0.916668	130.71	26.1226	7.10107	3.24789	2.52395	1.00473	130.206	24.8253	6.82261	5.56413	13.4819	10.6243	131.787	23.6631	5.88349	4.88366	6.70757	4.48108	68.6612	17.49	6.71858	3.35659	3.4906	1.41958	57.1349	13.8616	5.46074	2.77533	2.44748	1.31499	55.3161	13.9723	5.01481	3.09288	2.74096
1	0	2	0.62963	0	0	0	1	0	23	1.50099e+06	904525	-0.00594	-0.029485	0.93854	107.845	28.7777	6.68826	2.98235	2.27269	0.87141	93.1232	25.6012	5.79512	6.01986	9.58633	8.98124	133.506	31.2197	6.85491	4.13985	5.25469	4.07896	59.0673	19.6351	5.80562	2.98158	3.34079	1.21993	45.4223	15.1075	4.04741	2.53839	2.02963	1.03207	54.5011	15.797	4.97213	2.61983	2.52633
1	0	2	0.666667	0	0	0	1	0	23	1.34244e+06	794465	-0.162894	-0.127737	1.01668	149.432	27.3414	6.62491	3.72963	2.69112	0.91525	126.449	23.2284	6.06191	7.34869	8.89539	8.78863	175.792	24.5792	6.10945	4.91152	5.36774	3.95852	71.1909	22.1082	6.70127	4.04191	4.18556	1.41621	54.7074	16.2369	5.40083	3.36056	2.48088	1.09903	70.6753	16.095	5.44731	3.44349	3.2186
1	0	2	0.703704	0	0	0	1	0	23	878168	555027	-0.625868	-0.353922	0.956018	134.267	27.3166	5.65974	3.33864	2.58293	0.94452	114.512	21.3085	4.8273	6.64152	10.3378	9.46943	156.201	27.0054	5.49405	5.35701	5.79651	4.47691	77.5379	20.6626	5.31209	3.2098	4.38714	1.39692	56.0266	14.4967	4.20152	2.77749	2.83289	1.15715	76.3941	17.4546	4.52555	3.00126	3.41308
1	0	2	0.740741	0	0	0	1	0	23	1.3443e+06	970235	-0.158264	0.073699	0.976084	194.636	25.7529	6.39762	3.34212	3.14506	1.00688	177.236	22.4601	5.98686	6.84069	12.1699	10.3215	211.449	23.0861	5.9846	5.39376	6.50422	5.08714	86.2275	19.7999	6.29956	3.61107	4.72022	1.51973	67.7897	15.1305	5.3071	3.08028	2.68715	1.34992	82.7197	15.6524	5.0376	3.13069	3.20065
1	0	2	0.777778	0	0	0	1	0	23	1.85624e+06	1.04514e+06	0.354968	0.161886	0.91257	132.695	29.8642	7.23	4.14661	2.62639	0.97762	120.145	25.4369	5.93596	7.36521	11.9603	10.331	154.535	28.838	6.09589	5.7757	6.41977	4.98113	61.0667	21.2132	6.29908	4.20209	4.11868	1.43481	48.1121	16.2478	4.28057	3.97715	2.76798	1.31529	57.8978	17.138	5.28824	3.65592	2.79133
1	0	2	0.814815	0	0	0	1	0	23	1.94431e+06	1.1908e+06	0.444511	0.319963	0.932241	89.9437	22.4933	7.22129	3.12762	2.53529	1.0489	91.3131	20.7566	6.0931	6.22364	14.1039	12.261	98.2558	23.6089	6.78628	4.71554	6.70504	5.22331	48.2253	14.8762	5.78787	3.64166	4.16672	1.64034	39.0074	11.0513	4.4972	2.7941	2.68849	1.2685	44.0963	12.4476	4.74052	2.99242	3.17452
1	0	2	0.851852	0	0	0	1	0	23	1.52526e+06	1.02265e+06	0.026891	0.164407	0.935176	147.138	31.7398	6.82992	2.98911	2.42297	1.11305	179.466	32.8952	5.97083	5.82376	11.1271	9.92919	138.583	28.5935	7.07829	4.64613	5.98074	4.35429	62.8077	17.7834	5.1459	3.1513	3.53773	1.6523	53.8306	13.9666	4.2187	3.04381	2.34886	1.35906	52.1356	13.5165	4.52611	2.85019	2.7966
1	0	2	0.888889	0	0	0	1	0	23	1.59533e+06	669869	0.098514	-0.17638	0.995375	166.341	33.1557	6.51857	3.40187	2.56866	0.90285	161.68	29.6606	6.33175	6.89678	9.87723	9.31354	177.683	31.7975	5.84611	5.13951	5.42634	4.25061	73.1334	20.8965	5.83426	3.4798	4.26521	1.28739	57.5626	15.7622	5.07931	3.12158	2.70154	1.08052	70.7499	16.8147	4.24629	3.01137	3.00156
1	0	2	0.925926	0	0	0	1	0	23	1.79026e+06	1.03177e+06	0.294715	0.198932	0.919488	147.982	26.7371	7.56613	3.97659	2.61749	0.91687	138.62	24.7177	6.64596	6.74316	9.55036	9.23415	165.802	24.5164	6.9027	5.73407	6.32094	4.73196	67.4303	17.856	6.53086	4.20218	4.29058	1.20257	48.6173	14.6772	5.14538	3.85584	2.59426	1.10663	64.5816	14.0353	5.59279	3.98979	2.93816
1	0	2	0.962963	0	0	0	1	0	23	1.41691e+06	902985	-0.077139	0.082424	0.952644	141.134	28.585	6.93709	3.05293	2.18891	0.97983	141.887	26.0085	6.02312	6.40052	8.78487	7.99356	151.91	25.9125	6.14897	4.78334	6.0642	4.66061	66.1366	21.06	6.29542	3.26623	3.62341	1.5474	50.8497	15.2951	4.67878	2.61238	2.20152	1.32486	61.0734	16.9144	5.25791	3.12013	2.6675
1	0	2	1	0	0	0	1	0	23	944838	654983	-0.547748	-0.153163	0.972467	130.658	29.2562	7.03982	3.72842	2.75026	1.21397	117.989	24.2222	6.77035	5.90975	9.51426	8.08147	150.32	29.6153	6.55302	5.50485	5.81643	4.88466	66.0307	22.1695	6.34149	3.5906	4.17889	1.7103	50.0833	17.137	4.90219	2.95116	2.65559	1.38668	62.6375	18.4878	5.1869	3.22232	3.28052
1	1	0	0.037037	1	1	0	0	0	23	1.60177e+06	1.13327e+06	-0.569746	-0.105845	1.12034	135.504	30.4303	8.01085	2.6315	1.68332	1.1592	163.578	34.1317	8.77666	4.05928	3.40053	3.038	141.234	28.1806	7.44258	3.3913	3.668	3.42028	78.105	21.0812	7.6909	3.14654	2.62695	2.07638	66.6065	17.1853	6.16778	3.23238	2.75369	2.3939	62.3771	14.471	5.77526	5.17397	3.3573
1	1	0	0.074074	1	1	0	0	0	23	2.66372e+06	1.17847e+06	0.513507	-0.054731	1.19302	167.269	23.6708	6.96854	2.82059	2.21523	1.08732	183.102	26.5192	8.01231	3.02219	2.9513	1.87158	169.054	21.4428	5.17217	2.93535	2.83105	2.23311	91.3731	17.2668	6.31629	3.20358	3.34264	1.96217	80.2971	15.3663	5.58692	3.14901	3.07514	2.13104	73.2413	11.4978	4.456	4.2214	4.08069
1	1	0	0.111111	1	1	0	0	0	23	3.29145e+06	1.01427e+06	1.16227	-0.211719	1.14081	125.123	23.8662	6.16177	3.24863	2.08782	0.9345	152.224	26.6757	6.83016	3.29192	2.93052	1.81048	139.144	20.3572	5.21163	3.45537	2.80938	2.13263	68.0842	17.1219	6.37229	3.55928	3.0879	1.7005	65.6671	14.1386	5.31884	3.01106	2.71687	1.88737	55.6838	11.7591	4.62689	5.68316	3.91426
1	1	0	0.148148	1	1	0	0	0	23	1.84366e+06	732030	-0.264324	-0.487485	1.15972	130.527	30.283	7.34351	2.53698	2.03826	1.10257	146.821	29.4393	7.30333	3.11957	3.26218	2.18488	146.467	30.3734	6.4901	3.1205	2.98684	2.83607	64.1622	19.4521	6.77999	2.88902	2.80335	1.63386	52.6474	14.8512	5.25507	2.7812	2.95578	1.9596	53.2189	15.666	6.32188	3.23794	4.534
1	1	0	0.185185	1	1	0	0	0	23	3.07512e+06	1.18727e+06	0.98831	-0.025698	1.17155	131.422	27.4204	8.86461	3.54833	2.43272	1.1896	123.069	25.3452	7.48266	4.01838	3.25953	2.3719	180.417	25.6871	7.58466	4.27454	3.1858	2.44033	70.7779	20.5941	9.04396	3.92843	3.76947	1.99325	55.0849	16.729	6.63674	4.1295	3.25869	2.28131	65.5359	15.581	7.15054	3.87311	3.55391
1	1	0	0.222222	1	1	0	0	0	23	2.43692e+06	1.23255e+06	0.371284	0.02614	1.18241	114.252	34.6023	8.74369	3.06854	2.21946	1.10463	130.293	34.7221	8.5378	3.9937	2.93058	2.08041	149.345	34.8281	7.23428	3.39881	2.94803	2.87353	55.4606	21.309	8.2352	3.2993	3.41639	1.6644	49.2999	16.7133	6.1426	3.44444	2.9743	1.73466	51.7529	15.8247	5.46766	2.54111	2.45039
1	1	0	0.259259	1	1	0	0	0	23	1.69826e+06	733394	-0.346334	-0.46579	1.12912	86.7356	20.9461	5.51502	2.69854	1.95638	0.87386	91.5721	20.305	5.26464	2.96793	2.88876	1.76576	119.276	19.7804	5.11781	3.48991	3.17608	2.70593	53.7042	20.6568	5.97112	2.88938	2.59222	1.42058	44.9305	15.4482	4.59035	2.46136	2.10486	1.23185	51.1418	14.1064	4.27671	2.42089	2.12745
1	1	0	0.296296	1	1	0	0	0	23	1.77121e+06	1.0049e+06	-0.252244	-0.187543	1.12223	148.136	27.7398	7.68389	3.46429	3.04894	2.95628	177.986	28.8598	8.72043	4.71467	5.17317	6.4875	163.928	28.3448	6.10762	3.96677	4.57047	5.39637	74.2642	20.2081	7.7074	4.07114	4.2903	4.33683	71.6136	15.1586	8.64039	8.07157	12.1675	14.7642	61.0581	15.1241	5.10058	3.23018	3.39943
1	1	0	0.333333	1	1	0	0	0	23	1.36666e+06	687292	-0.635618	-0.498606	1.13433	99.9483	29.8964	6.84414	2.49787	1.89737	0.91901	113.674	28.3479	7.05792	2.72487	2.87143	1.7234	111.905	28.0141	5.81599	2.89785	2.92793	2.33083	61.3055	19.0584	6.9459	2.56971	2.71794	1.54186	54.1262	14.5554	5.52221	2.13182	2.16542	1.32037	50.8193	13.8532	4.85258	1.95475	2.16292
1	1	0	0.37037	1	1	0	0	0	23	1.51703e+06	1.14606e+06	-0.464023	-0.033538	1.1699	79.1568	21.8085	6.30478	2.36066	2.26161	0.84281	85.3346	19.8539	5.99223	2.74713	3.1056	1.92894	103.928	21.2442	5.89978	3.16777	3.38235	2.65607	52.3178	18.3698	6.89029	2.54461	3.06587	1.35356	44.5307	13.478	5.38047	2.3243	2.31116	1.14153	42.6398	14.4097	5.2464	2.08156	2.25664
1	1	0	0.407407	1	1	0	0	0	23	1.14144e+06	1.67235e+06	-0.818551	0.499838	1.13013	127.218	26.0204	6.54241	2.39068	2.45675	0.96556	151.922	26.812	6.6037	2.61143	3.41584	2.08723	141.32	27.3455	5.97511	3.22175	3.88076	3.29238	67.0601	20.0069	6.35303	3.05005	3.75836	1.52645	63.4442	15.6386	4.85097	2.46343	2.63268	1.23434	52.892	14.9977	4.64139	2.31967	2.80324
1	1	0	0.444444	1	1	0	0	0	23	1.45399e+06	1.65131e+06	-0.484729	0.484857	1.189	117.957	24.6577	5.84838	2.75212	2.19958	0.98448	121.663	22.6731	5.76473	2.86691	3.67464	2.42359	150.285	26.7107	6.50593	3.94702	4.21575	4.33507	62.4583	19.508	5.62399	2.92651	3.36519	1.63702	53.2688	14.0823	4.41938	2.53191	2.31224	1.3857	51.6589	15.1627	4.71368	2.28451	2.42865
1	1	0	0.481481	1	1	0	0	0	23	1.69158e+06	1.61278e+06	-0.225995	0.453036	1.18488	150.783	34.4635	7.47399	3.21893	1.95388	0.90576	164.739	35.0098	7.01626	3.35424	3.34044	2.23663	184.072	32.9518	8.28788	4.89302	5.29587	4.54324	77.3153	23.0458	6.88078	3.50209	2.9924	1.51981	64.6456	18.1834	5.60966	2.7967	2.27543	1.36015	67.5996	17.8418	5.86511	2.85062	2.11371
1	1	0	0.518519	1	1	0	0	0	23	2.04093e+06	1.19753e+06	0.144419	0.044898	1.14261	128.107	26.7986	7.40198	2.73885	1.88073	0.81562	137.372	26.8744	6.6383	2.82398	3.31538	1.97324	142.896	26.0779	6.58349	4.10923	4.69037	3.75417	71.516	20.7661	6.5788	2.90765	2.72739	1.51551	62.1539	15.7756	4.95199	2.42604	2.14314	1.2536	60.1945	15.1485	4.86352	2.34931	1.87645
1	1	0	0.555556	1	1	0	0	0	23	2.1652e+06	788897	0.28989	-0.357303	1.16582	113.178	26.3748	7.4002	2.46898	2.31796	0.88004	116.368	27.4808	7.0738	2.90604	3.83462	2.12087	154.432	28.3587	7.29423	4.15423	4.49111	4.0191	59.6669	20.144	7.44996	2.77443	3.59408	1.50545	46.9947	16.0635	5.60602	2.4556	2.64806	1.2704	56.8882	14.5843	6.2106	2.18695	2.54801
1	1	0	0.592593	1	1	0	0	0	23	2.93553e+06	1.3095e+06	1.0813	0.170269	1.13698	124.045	26.8613	7.14929	3.66715	2.2412	0.98128	128.495	25.4368	6.12215	3.65919	3.61103	2.38728	159.219	29.1235	7.16349	5.87539	5.73511	5.31303	63.9598	18.1972	6.40176	3.77205	3.40044	1.47813	58.1015	14.0748	4.86834	3.17272	2.52409	1.33673	54.3027	13.7371	4.71501	3.21079	2.32948
1	1	0	0.62963	1	1	0	0	0	23	1.98201e+06	1.32644e+06	0.148839	0.194362	1.09087	121.765	23.2249	6.65562	2.70149	2.20857	1.09718	132.468	24.3309	6.18035	3.12982	3.52243	2.20423	147.474	23.168	7.17212	4.47334	5.43351	4.70408	72.0647	18.4099	5.93423	2.92377	3.36893	1.62659	60.9308	14.9557	4.54784	2.84029	2.7134	1.37851	61.1103	13.6022	4.52084	2.41633	2.40842
1	1	0	0.666667	1	1	0	0	0	23	1.9921e+06	803047	0.18158	-0.329899	1.8147	123.017	28.6424	8.9584	2.52763	2.33205	0.851	139.305	34.4164	9.01913	2.5652	3.43368	2.10307	157.954	27.6764	8.24839	4.98281	5.34711	4.61344	57.009	18.6602	7.7877	2.95412	3.43191	1.26447	50.016	16.7843	5.77539	2.31987	2.67742	1.15193	48.7865	13.3398	5.60671	2.42064	2.63196
1	1	0	0.703704	1	1	0	0	0	23	2.07518e+06	1.27385e+06	0.284446	0.154439	1.15596	103.517	26.4373	6.75273	2.34132	2.23187	0.91221	107.887	25.4488	6.15446	2.41369	3.38093	2.00356	134.567	21.7886	6.10263	4.58475	5.6119	4.90081	53.3406	22.3805	7.37496	2.73476	3.05599	1.51697	40.3416	15.8558	5.39762	2.38993	2.38432	1.25154	54.1204	15.4719	5.55774	2.32627	2.41529
1	1	0	0.740741	1	1	0	0	0	23	1.43468e+06	1.01457e+06	-0.335025	-0.097532	1.09388	117.614	29.6225	7.11148	2.46046	1.87779	0.92024	119.169	30.0717	6.50158	2.56802	3.53365	2.26597	157.117	29.2455	6.67967	5.37428	6.12189	6.29322	67.6682	19.9672	7.00444	2.53995	2.69165	1.46408	54.8944	16.0847	5.31423	2.27206	2.14628	1.38296	61.4064	15.7973	5.11614	2.27663	2.24143
1	1	0	0.777778	1	1	0	0	0	23	1.70771e+06	922338	-0.040856	-0.183049	1.09009	165.643	29.9962	7.37267	2.44105	1.84012	0.90729	179.547	30.9585	7.35961	2.83746	3.41566	2.55744	166.39	30.256	6.60154	5.26852	6.16963	5.53474	91.478	20.3021	7.33806	2.75728	2.74696	1.45876	75.7121	15.6189	5.5713	2.44184	2.56381	1.407	71.3471	15.1541	5.2756	2.15502	2.30633
1	1	0	0.814815	1	1	0	0	0	23	1.23019e+06	1.30163e+06	-0.497222	0.20288	1.09299	136.937	35.0546	6.48254	2.61723	2.13597	0.86463	149.878	36.3329	7.21353	2.9773	3.93621	2.52479	171.971	34.6888	7.10646	6.65138	8.23841	6.25808	74.5355	23.296	6.35391	2.90511	2.85992	1.51502	65.7139	18.9526	5.36854	2.45243	2.36275	1.39684	65.2941	17.5182	4.50322	2.68669	2.36566
1	1	0	0.851852	1	1	0	0	0	23	898160	1.2045e+06	-0.80811	0.112475	1.08812	139.739	30.1624	7.58407	2.5085	1.98141	0.88056	152.901	32.6859	7.79069	3.63485	4.88547	3.85926	165.777	27.6683	7.09234	5.80241	10.4789	8.42631	69.8518	22.0721	7.84951	2.70491	3.5073	1.4936	61.3399	17.4475	5.94282	2.53814	3.05593	1.41615	58.9614	16.1384	5.79442	2.17991	2.70214
1	1	0	0.888889	1	1	0	0	0	23	1.14971e+06	987557	-0.535454	-0.097584	1.06768	158.644	28.6229	7.85282	2.62741	2.4593	0.96266	168.292	30.6238	7.80962	3.42735	4.99331	3.96311	182.173	27.9983	7.57609	7.20352	10.2973	7.66535	91.7758	17.9814	7.39212	3.00936	3.57222	1.55658	74.1368	14.7208	5.73131	2.65719	2.72605	1.55131	75.7476	13.2278	5.65361	2.60682	2.73083
1	1	0	0.925926	1	1	0	0	0	23	1.71242e+06	872784	0.048513	-0.206201	1.11705	146.373	35.9462	9.00472	3.39412	2.23946	1.03366	136.901	36.0968	8.67013	4.3342	5.33664	4.21815	195.895	36.6227	8.70157	7.63043	10.5634	8.48709	67.1094	22.2611	8.46864	4.05938	3.9307	1.57837	51.1032	17.2563	5.8823	3.60184	3.22075	1.59572	64.0694	16.6286	6.44249	3.52072	2.79063
1	1	0	0.962963	1	1	0	0	0	23	2.20321e+06	841223	0.560436	-0.230991	1.10743	178.671	38.0888	7.13657	3.42126	2.02309	0.84275	180.417	38.1436	7.12571	4.1515	4.08942	3.02235	223.141	33.521	7.43479	7.77769	8.33089	7.56313	90.2016	26.3519	5.7487	3.88621	3.12982	1.30581	71.349	20.7896	4.53162	3.0628	2.53771	1.15402	82.0207	18.3693	4.69979	3.411	2.43634
1	1	0	1	1	1	0	0	0	23	1.9486e+06	1.19393e+06	0.326969	0.128385	1.10723	95.1871	22.5779	5.85718	2.33612	2.00914	0.85089	123.766	23.9922	6.05041	3.41697	4.33786	3.47903	115.346	19.7983	5.39957	7.15207	9.59791	7.6603	58.199	17.9428	5.16801	2.59546	3.01325	1.28712	52.964	14.3249	4.43447	2.20649	2.47752	1.18583	49.0591	12.3155	4.05437	2.11908	2.34074
1	1	1	0.037037	1	0	1	0	0	23	1.16761e+06	809668	-0.393727	-0.364157	2.16955	152.392	30.9201	8.70561	3.69884	5.7909	7.25679	179.258	36.398	9.902	6.01863	15.6335	22.5812	152.769	29.9372	8.24175	4.78088	8.59696	12.7457	84.4815	20.8055	7.60425	5.04155	8.4209	9.29587	81.4694	18.0079	9.36549	14.9628	34.1092	50.657	67.203	14.6588	6.17755	4.66677	6.33396
1	1	1	0.074074	1	0	1	0	0	23	1.37203e+06	1.20604e+06	-0.192629	0.034746	1.54727	171.743	36.534	10.9624	3.57216	2.86392	2.26954	190.487	39.9212	11.3591	3.82856	3.18769	2.96728	210.301	39.6531	9.43506	4.98986	5.08173	7.27979	88.142	24.1527	10.022	3.99509	4.10404	2.76385	77.7506	19.1637	8.23597	3.47418	3.42812	2.71718	77.4637	18.2898	7.41614	3.75837	3.61565
1	1	1	0.111111	1	0	1	0	0	23	2.12395e+06	864470	0.558221	-0.315688	2.01998	93.9481	24.1825	5.96422	2.82995	1.86487	0.74792	100.167	23.5368	5.09998	2.89336	2.52352	1.45371	102.844	19.9148	5.2642	3.25297	2.58414	2.00004	50.9796	17.7942	5.40829	2.79722	2.88476	1.24537	44.3596	13.187	4.1778	2.39617	2.14369	1.13943	43.5606	13.2752	4.40284	2.40417	2.11635
1	1	1	0.148148	1	0	1	0	0	23	1.34482e+06	881963	-0.223766	-0.297982	1.6206	104.418	33.8279	6.79997	2.80215	2.43721	0.88056	111.37	35.9755	7.33555	3.08135	3.18412	1.67528	139.784	29.0951	6.38477	3.10845	3.08443	2.42328	54.3885	23.8649	6.78819	2.97644	3.95869	1.40875	50.4693	18.893	5.48294	2.51913	2.58264	1.22238	49.4814	16.6285	5.28961	2.5014	2.44515
1	1	1	0.185185	1	0	1	0	0	23	1.04055e+06	921534	-0.530368	-0.260878	1.47867	128.071	24.2323	8.0979	3.72681	2.31006	0.86311	128.717	23.0654	7.20759	3.75285	3.21761	1.75694	167.166	23.6686	7.19812	3.97698	3.11813	2.21954	65.4099	19.3495	7.38322	4.09932	3.57127	1.35847	52.0032	14.6543	5.45589	3.60877	2.7306	1.31946	64.9926	15.0313	6.0011	3.35782	2.40775
1	1	1	0.222222	1	0	1	0	0	23	1.93477e+06	1.48344e+06	0.361765	0.297283	1.45934	167.029	27.9837	9.83641	4.43493	3.42679	1.83822	162.71	28.8564	9.33416	3.93231	3.95115	2.46829	207.816	29.1384	8.54057	5.19979	5.17597	5.34457	88.184	19.1025	9.74531	4.00128	4.78549	2.30135	72.0536	15.114	8.11314	2.89042	3.82987	1.94484	87.4604	15.0402	7.61966	4.24793	4.91238
1	1	1	0.259259	1	0	1	0	0	23	1.13631e+06	1.01491e+06	-0.438287	-0.177403	1.67179	174.27	28.7011	8.97718	3.0291	2.39868	0.85741	163.251	28.7032	8.13054	3.06657	3.0585	1.64722	212.054	26.8575	7.44494	3.60913	3.22762	2.22424	92.0739	22.0425	9.39193	3.52168	3.83887	1.56764	70.7421	17.6713	7.34145	2.7264	2.68228	1.30762	84.4787	16.2549	6.47094	2.76427	2.49808
1	1	1	0.296296	1	0	1	0	0	23	1.68598e+06	1.00853e+06	0.108648	-0.184251	1.33775	79.4273	19.2388	5.89041	2.58444	2.12905	0.80769	88.8844	20.0763	5.71902	2.59029	3.20502	1.67725	99.6106	16.665	5.16501	3.07921	3.12299	2.5491	47.813	17.1637	6.31072	2.81929	3.40923	1.41364	41.6691	14.1794	4.67869	2.23884	2.589	1.13564	43.5726	12.7275	4.6144	2.28699	2.53467
1	1	1	0.333333	1	0	1	0	0	23	1.34492e+06	914917	-0.232999	-0.289123	2.03981	139.529	24.1788	7.23788	2.88466	2.32446	0.85971	154.514	25.7273	7.16309	3.32165	3.95551	2.74231	164.253	23.3072	6.32104	5.17705	6.52457	5.50336	73.4431	19.0953	7.65168	3.18154	3.48611	1.58034	66.3312	15.6313	5.83087	2.81496	2.46648	1.40508	63.0549	13.4759	5.57321	2.67292	2.59583
1	1	1	0.37037	1	0	1	0	0	23	1.16329e+06	842340	-0.41795	-0.359172	1.41835	91.6455	16.0111	6.48844	2.90771	2.0274	0.87842	96.5788	16.0118	5.768	3.19967	3.80909	2.14068	102.082	15.2997	6.74924	5.33938	4.86158	4.62382	61.3266	14.4299	7.19904	3.21626	3.12986	1.59434	48.9986	11.2143	5.59211	2.65386	2.45993	1.31956	53.8978	11.1366	5.77891	2.88404	2.28759
1	1	1	0.407407	1	0	1	0	0	23	2.1839e+06	2.29146e+06	0.600456	1.08682	1.3405	151.237	31.9334	8.24529	3.51067	3.45116	2.93073	164.48	32.3987	8.91332	3.8617	4.38588	4.12241	181.666	32.1614	8.38247	6.57821	9.28536	12.3203	70.3497	21.4004	7.32	3.59274	5.31583	3.23469	61.7707	16.9904	5.96694	3.08107	3.7218	2.77089	62.9917	17.5734	5.67388	3.97389	5.47372
1	1	1	0.444444	1	0	1	0	0	23	1.24178e+06	1.49187e+06	-0.34315	0.280472	1.60968	85.813	22.5004	5.98841	2.37057	1.95911	0.79102	87.7885	21.5863	6.52717	2.54131	3.07876	1.76827	114.2	20.0306	5.69595	4.66642	4.19954	3.45964	54.0208	19.9696	6.18926	2.67294	3.12202	1.37577	45.0914	15.6278	5.22893	2.21292	2.24321	1.30174	46.685	14.5297	4.62322	2.26279	2.52894
1	1	1	0.481481	1	0	1	0	0	23	1.52861e+06	1.05481e+06	-0.057367	-0.165513	2.08767	107.626	23.7329	5.95441	3.0945	2.4258	0.86636	101.614	20.8263	5.72603	3.23451	3.61381	1.92055	146.598	21.9725	5.7287	4.83609	4.87018	4.10464	58.1529	21.0286	6.51988	3.51626	3.72834	1.37313	46.3306	15.5434	5.23472	2.78953	2.63904	1.17879	55.9059	17.0867	5.04771	2.82633	2.61608
1	1	1	0.518519	1	0	1	0	0	23	1.84048e+06	1.21169e+06	0.2511	-0.005695	1.42692	111.532	27.4274	5.95534	2.6437	2.31145	0.98993	116.419	26.2973	5.78445	3.09904	3.83636	2.22747	125.13	22.5249	5.42596	4.6641	6.18771	4.77969	70.009	22.5544	6.46464	2.92006	3.59323	1.4015	61.2341	16.934	5.07677	2.43497	2.4832	1.35417	56.1191	15.9601	4.60406	2.32213	2.51804
1	1	1	0.555556	1	0	1	0	0	23	1.35272e+06	1.03888e+06	-0.237307	-0.189478	2.10203	132.488	26.0368	6.9145	3.1675	2.39612	0.92371	136.534	26.0778	6.6965	3.19103	3.81474	2.26015	157.667	22.0441	7.12048	5.70777	5.93056	4.86962	75.8058	21.5358	5.9942	3.3888	3.37138	1.35573	60.3164	16.4174	5.00508	2.68079	2.62138	1.15028	66.9062	15.6259	4.77485	2.91554	2.53756
1	1	1	0.592593	1	0	1	0	0	23	1.16248e+06	955567	-0.430633	-0.271462	1.59514	171.698	24.6972	6.81549	3.13641	2.16318	0.88857	180.234	24.9299	6.78468	3.75248	3.27369	2.00203	191.169	24.7106	6.09708	5.80364	4.77165	4.9296	84.3124	17.2222	7.40491	3.6134	3.44666	1.52928	69.2634	13.1847	5.93955	3.36807	2.61386	1.25193	70.3764	13.2068	5.44336	2.90769	2.58229
1	1	1	0.62963	1	0	1	0	0	23	1.58309e+06	969765	-0.00882	-0.277608	3.16956	120.121	24.447	6.43734	2.38047	2.27357	0.83266	125.603	21.6647	6.03264	2.74851	4.09497	2.07789	179.676	24.5742	6.26671	4.63172	7.54929	4.70084	57.314	19.173	6.01547	2.70557	3.52997	1.28271	46.7071	13.8994	4.37649	2.34619	2.75712	1.18051	55.2908	14.5746	4.99697	2.3799	2.50988
1	1	1	0.666667	1	0	1	0	0	23	1.94083e+06	964183	0.343228	-0.268682	1.39787	79.9101	19.4255	5.79565	2.6709	2.1971	0.86819	80.4211	16.9989	5.44159	2.89963	3.29518	2.08674	116.316	19.1357	5.6479	5.32834	5.53514	5.02056	55.6849	16.6707	6.65536	3.03632	3.55011	1.35361	43.6818	11.502	5.28513	2.82843	2.60831	1.11658	49.841	12.8502	5.16152	2.84093	2.33263
1	1	1	0.703704	1	0	1	0	0	23	1.8699e+06	1.39861e+06	0.272832	0.148815	2.64431	111.823	22.5861	6.58019	2.96004	1.98088	0.80397	104.799	22.7201	6.07432	3.23402	3.17448	2.1176	146.231	20.527	5.75394	5.10065	5.9213	5.03026	60.4181	17.3933	7.14287	3.25592	2.79196	1.28618	51.2486	13.2621	5.26324	2.5704	2.08	1.06311	57.379	12.2167	5.54244	2.69262	2.0833
1	1	1	0.740741	1	0	1	0	0	23	1.88743e+06	1.15388e+06	0.286157	-0.088935	1.59591	79.2739	18.2523	6.24807	2.81209	1.881	0.90664	102.818	19.4025	6.14677	3.09262	3.51898	2.13806	89.1151	15.2765	5.5165	4.73816	6.2972	5.05104	47.1292	15.289	6.1661	2.88147	3.28479	1.38913	48.5862	11.808	4.68452	2.39753	2.18529	1.22027	38.6848	10.4609	4.68737	2.3344	2.11453
1	1	1	0.777778	1	0	1	0	0	23	1.70255e+06	1.03005e+06	0.098774	-0.214348	1.36884	112.453	23.9611	8.06655	2.88732	2.147	0.86131	124.93	23.7142	6.87292	3.2778	3.49972	2.37459	129.794	23.5654	8.12136	5.61822	7.1949	5.59294	71.3883	18.9334	7.7838	3.05801	2.96061	1.44743	58.619	14.7168	5.68995	2.50606	2.21219	1.17778	60.5354	13.9171	6.13539	2.54841	2.43746
1	1	1	0.814815	1	0	1	0	0	23	2.17857e+06	1.70996e+06	0.573402	0.458327	1.68474	113.951	26.1023	6.7517	2.93821	2.24303	0.78469	108.358	24.0194	5.86648	3.00594	3.79443	2.17296	154.889	24.6897	7.4181	6.30964	8.51418	5.85281	68.1898	19.1456	6.31499	3.04332	3.20444	1.24922	52.5492	14.6069	4.69844	2.52762	2.40371	1.06229	64.8613	14.6246	5.02433	2.66971	2.60737
1	1	1	0.851852	1	0	1	0	0	23	1.5043e+06	871365	-0.102226	-0.387624	2.01184	145.038	29.0011	9.20227	3.07417	2.54495	0.98419	142.704	28.8998	8.18419	3.63878	3.70836	2.37166	190.672	26.1881	8.01776	6.15703	7.13842	5.91195	70.9264	21.2332	8.0734	3.17295	4.06816	1.48445	55.5021	16.5961	5.86111	2.79629	2.79687	1.28339	64.6008	14.5169	6.23693	2.71321	3.05605
1	1	1	0.888889	1	0	1	0	0	23	1.65739e+06	1.14974e+06	0.047371	-0.105853	1.3072	175.951	30.942	6.53775	3.53949	2.26017	0.95811	170.969	29.884	6.54256	3.92004	3.2767	1.95518	222.427	31.8297	6.19573	5.54169	5.49179	4.74345	72.2024	21.4318	6.5482	3.67213	3.84906	1.28047	56.5126	16.8745	5.78098	3.18323	2.87727	1.198	69.3486	17.6032	4.58627	3.00465	2.34157
1	1	1	0.925926	1	0	1	0	0	23	1.31089e+06	1.12213e+06	-0.29967	-0.145014	2.03678	114.592	25.1436	7.66468	3.48913	2.2163	1.03137	118.494	22.9772	7.19198	3.62158	2.95333	1.84057	151.68	25.1867	6.68016	5.02245	4.84719	3.99254	58.2045	18.625	7.74247	3.71319	3.1716	1.39737	47.3783	14.6929	6.55216	3.02005	2.43556	1.22467	54.0714	16.7054	6.07682	2.92117	2.33402
1	1	1	0.962963	1	0	1	0	0	23	1.55321e+06	1.54261e+06	-0.059496	0.272075	1.98356	167.883	29.1382	8.58853	2.34522	1.94161	0.77136	182.231	27.657	9.26295	2.85622	3.28703	1.69372	192.186	25.2337	7.5508	3.91147	6.0028	3.71436	80.9145	22.3468	6.23632	2.78558	2.83346	1.20692	70.521	18.025	6.27434	2.59445	2.08893	0.97817	66.3915	16.9653	5.14493	2.41951	2.00769
1	1	1	1	1	0	1	0	0	23	1.43934e+06	1.81048e+06	-0.176375	0.540888	1.51447	166.626	27.8348	6.98479	3.00642	2.44327	0.7509	160.195	25.9213	6.55626	3.07361	3.34514	1.5762	211.32	22.8799	6.86737	4.63102	6.16678	3.83898	91.4648	25.1198	6.04665	2.95798	3.51161	1.13299	71.394	18.323	4.82495	2.52336	2.41648	1.03018	85.6212	16.3379	4.64028	2.55017	2.48796
1	1	2	0.037037	1	0	0	1	0	23	1.31186e+06	786038	-0.314722	-0.521838	1.20465	159.508	36.7	6.77973	2.75568	1.61719	0.95183	177.509	39.1517	6.90941	3.19775	2.42986	1.7937	185.288	39.6581	6.77814	2.82549	3.04146	2.71881	83.6027	20.8664	6.1106	2.89644	2.64454	1.4914	73.7827	16.8375	5.11659	2.70327	2.49195	1.65174	67.1149	16.4092	4.9912	2.20891	2.03193
1	1	2	0.074074	1	0	0	1	0	23	1.3799e+06	1.15583e+06	-0.245373	-0.148102	1.1807	180.375	41.4624	8.30396	3.04921	1.9617	0.94593	201.292	42.6639	8.89598	3.22464	2.7325	2.00366	208.281	43.2568	7.04761	4.39879	3.58844	2.94151	80.25	24.88	7.13178	3.20732	3.18448	1.5297	70.587	19.7197	5.76984	2.82678	2.66573	1.59338	67.2552	18.6673	4.74302	2.9402	2.53029
1	1	2	0.111111	1	0	0	1	0	23	1.6433e+06	1.15279e+06	0.01942	-0.147622	1.19732	106.778	26.3871	5.99903	2.52805	1.94496	0.86406	116.681	26.5515	5.54209	2.4299	2.8271	1.87739	142.711	28.9489	5.91903	3.77797	3.61133	2.99439	56.332	18.0727	5.71141	2.80961	3.22661	1.2736	47.852	14.6334	4.67748	2.34965	2.56306	1.49218	48.4698	14.1726	4.52691	2.63087	2.39325
1	1	2	0.148148	1	0	0	1	0	23	2.25357e+06	2.02244e+06	0.63109	0.725536	1.21474	128.578	28.4614	6.48792	2.7618	2.08676	0.96545	163.826	33.1759	6.96703	2.73751	2.98879	2.04923	153.345	27.1812	6.35055	3.86516	3.68492	3.154	56.7195	17.4871	5.31478	3.04144	3.16388	1.51289	54.6015	14.2895	4.75062	2.92181	2.79391	1.62115	50.1638	13.3474	3.99414	2.36089	2.31315
1	1	2	0.185185	1	0	0	1	0	23	1.56795e+06	1.32243e+06	-0.053126	0.029014	1.23495	151.197	33.5287	7.68253	3.113	2.31739	1.00559	172.897	37.9179	8.0329	3.39507	3.01061	1.95981	170.101	30.8343	7.06879	3.93803	3.92544	3.12771	78.2398	20.7542	6.35859	3.36081	3.17694	1.50923	65.4521	17.5902	5.18255	2.84981	2.5925	1.46945	65.1016	15.5853	4.96738	2.88699	2.82487
1	1	2	0.222222	1	0	0	1	0	23	1.28691e+06	893486	-0.332863	-0.395945	1.20659	129.963	34.0991	5.77641	2.08016	2.14522	0.93863	142.49	35.7531	6.044	2.47515	3.119	2.12791	149.859	32.7934	5.88811	3.44261	4.35617	3.18699	72.4526	22.2647	5.47538	2.54887	3.10297	1.44544	57.1555	17.0505	4.32161	2.36614	2.47766	1.41346	55.314	15.3803	4.13963	1.9203	2.26061
1	1	2	0.259259	1	0	0	1	0	23	1.48993e+06	667296	-0.128	-0.620905	1.44308	111.472	29.5313	7.69852	2.91674	2.13753	0.9702	127.051	29.1054	7.15638	3.34535	3.78881	2.33227	135.398	29.171	7.75962	4.51476	5.90523	5.06142	57.2259	19.9685	7.04304	3.55814	3.21239	1.42789	47.8367	15.9269	5.62974	3.28887	2.71415	1.55705	48.4605	14.4313	5.09021	2.59169	2.16244
1	1	2	0.296296	1	0	0	1	0	23	1.65328e+06	1.83752e+06	0.036047	0.556366	1.12103	108.266	28.8879	7.45888	2.2411	2.35566	1.01959	141.473	30.1283	7.68955	3.08853	4.2262	2.93044	149.587	29.2462	7.93582	4.91851	6.3994	6.5818	57.0493	19.707	7.32449	2.5835	3.57103	1.48547	52.556	15.5405	5.55026	2.46852	2.99199	1.55352	50.4201	15.3785	5.50629	2.12626	2.4444
1	1	2	0.333333	1	0	0	1	0	23	1.58205e+06	1.22117e+06	-0.033713	-0.056812	1.17154	128.181	26.7145	7.29941	2.81609	1.7879	0.79959	136.103	28.6497	6.79227	3.2287	3.42571	2.29518	169.586	25.5559	7.02328	5.26382	6.05103	5.35644	59.8773	18.7249	7.11537	3.17339	2.81033	1.32297	48.9941	15.5193	5.77786	3.18262	2.4418	1.35198	53.8695	12.8737	5.29275	2.45477	1.9783
1	1	2	0.37037	1	0	0	1	0	23	1.59474e+06	1.47244e+06	-0.019749	0.198566	1.13171	108.414	28.3419	6.38472	2.95956	2.23814	0.98414	138.112	30.3564	6.52364	3.14179	3.29539	2.47054	124.129	24.9685	5.82685	5.21778	5.94739	5.11584	50.9387	19.6466	6.04378	3.27354	3.49924	1.43834	45.9476	14.2131	4.88038	3.08621	2.7304	1.47705	41.8023	14.8494	4.74009	2.70013	2.47403
1	1	2	0.407407	1	0	0	1	0	23	1.71119e+06	1.08523e+06	0.098122	-0.185278	1.16259	128.198	33.5532	9.31934	2.89117	2.09358	0.82919	134.697	30.8901	9.30642	3.39358	3.5811	2.23093	186.442	34.6906	7.98245	5.62844	7.33976	6.34687	64.4593	22.6354	7.34029	2.93425	3.43326	1.2469	53.707	17.4536	5.9719	2.6214	2.81396	1.15071	62.5147	18.0019	5.55058	2.5212	2.49598
1	1	2	0.444444	1	0	0	1	0	23	1.81734e+06	1.1442e+06	0.205489	-0.121866	1.09049	128.443	30.6933	9.3455	2.52641	2.00627	0.79239	138.553	32.0333	8.14951	2.84273	3.70048	2.274	160.786	28.9618	8.95222	5.92906	5.81674	5.91067	60.2042	23.6531	8.24722	2.79887	3.04321	1.22128	50.9785	19.5219	5.99313	2.37035	2.58834	1.15309	56.4309	16.8014	6.28494	2.41755	2.25603
1	1	2	0.481481	1	0	0	1	0	23	1.4181e+06	1.50529e+06	-0.192374	0.242821	1.1001	133.206	31.5316	8.6302	3.40033	2.08247	0.79631	137.939	31.0923	8.52705	3.56447	3.18713	2.28637	157.03	28.0399	7.72954	5.90822	6.8064	5.44315	68.3842	23.6863	7.59527	3.66286	3.3018	1.27434	56.8571	18.6833	6.05271	3.14335	2.45359	1.08236	56.8096	16.2898	5.71348	3.13253	2.37591
1	1	2	0.518519	1	0	0	1	0	23	1.44787e+06	1.33987e+06	-0.161195	0.080871	1.12133	160.148	31.3362	6.93397	2.68028	2.25135	0.73896	184.979	31.7553	6.70182	2.97794	3.40201	2.19374	202.362	28.0802	6.17402	5.71201	7.2884	5.74593	66.3989	21.727	6.9271	3.10081	3.55817	1.22672	61.9761	16.2658	5.47715	2.72654	2.79935	1.19799	59.3689	17.1599	5.49101	2.9538	2.90567
1	1	2	0.555556	1	0	0	1	0	23	1.47197e+06	1.0564e+06	-0.135686	-0.199164	1.14666	198.82	35.5646	7.28407	3.17233	2.41282	0.85442	205.587	33.6388	6.94595	3.83411	3.36995	2.2385	228.175	31.3383	6.40665	6.7037	7.86445	6.4919	96.7131	27.1862	7.76388	3.40629	3.72901	1.27173	75.4451	19.2518	5.66858	3.2351	2.58014	1.26121	81.6	20.1861	6.15107	3.03461	2.56916
1	1	2	0.592593	1	0	0	1	0	23	1.68349e+06	982448	0.077274	-0.269787	1.18125	196.462	27.3289	5.85477	2.69489	2.09228	0.83485	197.808	28.3845	5.35672	3.29454	3.84842	2.22974	234.228	25.7762	6.46093	5.95431	7.81909	6.20902	96.2646	20.8889	5.6345	2.94236	2.86491	1.27677	73.048	15.538	4.21131	2.88498	2.2752	1.23194	87.8168	16.1711	4.79407	2.4683	2.41054
1	1	2	0.62963	1	0	0	1	0	23	1.7678e+06	885627	0.16315	-0.363972	1.28268	164.24	36.7777	10.7369	3.28548	2.26963	1.02511	178.824	37.867	9.48913	4.45169	4.03044	3.52959	213.913	38.1502	9.58896	7.90929	9.50568	8.49148	72.7398	21.5949	7.96549	3.47056	3.27982	1.42619	61.5524	16.0423	5.7884	3.65049	2.76773	1.51118	66.4561	17.3351	6.5059	2.80659	2.64253
1	1	2	0.666667	1	0	0	1	0	23	1.24641e+06	1.09676e+06	-0.356812	-0.149489	1.31531	165.564	34.4695	8.3515	2.61264	1.92157	1.0315	190.225	35.5491	7.78842	3.61519	4.54102	3.08633	216.565	37.2758	8.2668	6.26764	9.00074	7.3686	67.5544	22.4503	8.04968	3.02132	2.77301	1.47634	59.8766	17.389	5.99796	2.47101	2.39145	1.49113	61.4387	16.4316	6.30344	2.21506	2.54814
1	1	2	0.703704	1	0	0	1	0	23	1.09249e+06	1.33333e+06	-0.509453	0.091201	1.27493	121.145	24.4013	6.81726	3.34449	2.37562	0.94029	113.194	22.9407	6.53438	3.55708	4.21762	2.99417	174.597	25.3318	6.20957	7.84674	8.45747	7.48385	61.4792	17.4994	7.07433	3.94768	3.32413	1.34281	42.6642	12.8374	5.22678	3.53524	2.57965	1.3462	61.5468	14.2387	5.29816	3.31485	2.74446
1	1	2	0.740741	1	0	0	1	0	23	1.85956e+06	1.49566e+06	0.25899	0.257169	1.28018	99.1902	18.165	7.49076	2.39075	1.93595	0.98834	99.4195	17.0912	7.01697	3.07133	4.25167	3.05479	137.122	21.3632	7.20994	6.00302	7.99854	7.83866	61.5972	15.2159	6.95685	2.54868	2.79318	1.5385	49.196	11.1836	5.00561	2.27093	2.28858	1.38453	54.2123	11.9953	5.1162	2.27168	2.24098
1	1	2	0.777778	1	0	0	1	0	23	1.57289e+06	958558	-0.026345	-0.276153	1.27168	104.904	23.6669	6.77457	2.16371	1.83326	0.88423	110.175	23.6617	6.96367	2.95943	4.15715	3.05091	141.809	23.7498	6.71492	6.0657	8.06272	7.60044	66.1556	18.723	6.36105	2.41552	2.97314	1.39451	53.2792	15.1548	5.04052	2.1461	2.28886	1.32037	59.4187	13.4795	4.95277	2.03558	2.48097
1	1	2	0.814815	1	0	0	1	0	23	1.30536e+06	1.1688e+06	-0.292512	-0.062209	1.2704	130.005	34.7468	6.71489	2.76185	1.84303	0.798	161.412	37.5565	7.18085	3.65793	3.8919	2.8324	149.99	34.3419	7.65323	6.74118	8.49787	7.55157	68.0072	20.3595	5.91411	3.14624	2.54134	1.38242	63.0094	16.1214	5.15818	2.47646	2.03927	1.25752	55.1442	15.5857	4.76712	2.6309	1.91367
1	1	2	0.851852	1	0	0	1	0	23	1.70887e+06	1.5987e+06	0.112439	0.371012	1.3068	141.717	30.6203	7.22661	2.98229	2.23241	0.81292	143.089	32.2911	7.60524	3.84551	4.25625	3.32416	194.363	31.4159	7.73567	6.98944	8.6296	7.70782	68.969	20.115	6.37674	3.31055	3.31374	1.35745	58.6209	17.006	5.34291	2.81252	2.42048	1.29954	61.5807	15.9929	4.96326	2.76885	2.43989
1	1	2	0.888889	1	0	0	1	0	23	1.40117e+06	1.0677e+06	-0.193893	-0.156355	1.31236	77.6485	25.4034	6.95605	2.67584	2.08452	0.82705	93.8024	25.2227	6.53821	3.20562	4.31844	2.87432	88.4969	21.8494	6.74685	6.1948	9.00393	7.22633	53.9218	20.5972	6.79118	3.29597	3.06532	1.41981	48.2085	16.2585	5.10295	2.73977	2.38253	1.28418	41.7437	15.519	5.38272	2.75402	2.53455
1	1	2	0.925926	1	0	0	1	0	23	1.42016e+06	937034	-0.173671	-0.282679	1.25002	192.459	34.8854	6.93504	3.0334	2.03739	0.81588	232.635	37.5576	6.91978	3.78328	4.85121	3.23282	208.859	32.0172	6.66532	7.65381	10.7146	7.75644	93.5076	22.2628	6.79746	3.05546	3.4391	1.33793	87.2113	18.583	5.50632	2.58537	2.52136	1.291	73.7733	16.7713	5.50254	2.58467	2.35873
1	1	2	0.962963	1	0	0	1	0	23	1.80348e+06	1.40796e+06	0.211087	0.191557	1.28705	104.085	28.7194	8.04054	3.42162	2.13853	0.98393	110.288	27.4168	8.31167	4.24778	4.04576	2.87266	149.424	30.3688	8.27112	7.59103	8.1496	6.85273	52.0263	18.951	7.54947	3.60459	3.13348	1.43107	40.8568	14.2845	5.85701	3.12335	2.43495	1.35791	47.3369	15.1466	6.08637	3.45791	2.44548
1	1	2	1	1	0	0	1	0	23	2.12351e+06	1.48402e+06	0.53254	0.271012	1.31558	103.6	26.3923	7.08854	2.82394	2.12922	0.89509	114.766	24.8012	7.37749	3.4742	3.84973	2.77777	105.333	22.3016	6.05586	5.30187	6.5887	5.92445	66.9652	21.7969	6.28888	2.78131	2.95593	1.49516	57.7765	16.2461	4.97174	2.52349	2.44395	1.35601	52.7152	16.7863	4.8729	2.25005	2.51889
2	0	0	0.037037	1	1	0	0	0	27	3.81793e+06	3.2773e+06	1.08745	1.1733	1.16354	206.933	59.1993	36.7908	8.21627	9.35249	3.54895	186.53	53.951	31.3158	10.4996	11.9635	7.53087	172.769	45.1762	24.303	7.48798	10.8709	5.89	58.9188	27.8779	34.3315	9.48499	9.72636	4.66078	60.8874	25.1792	52.9012	9.53694	11.4933	6.44373	55.2064	21.0137	39.193	9.70458	14.451
2	0	0	0.074074	1	1	0	0	0	27	3.64959e+06	2.12155e+06	0.95028	0.037516	1.15824	341.095	56.1804	45.1065	10.434	11.0276	4.57509	315.98	53.3259	45.4533	13.7954	16.2805	11.464	290.934	42.2821	29.854	10.7311	12.5663	7.00668	107.279	33.5468	52.6644	11.2774	13.0021	5.66625	104.664	28.9179	61.3108	11.5933	13.9168	7.28075	92.2388	26.1557	49.3578	12.4969	16.1721
2	0	0	0.111111	1	1	0	0	0	27	1.81539e+06	1.72579e+06	-0.852749	-0.338221	1.14621	286.106	56.766	33.0065	10.148	8.97582	3.5497	270.232	52.6928	33.0917	11.9781	13.2766	11.3149	240.544	43.1219	23.6298	9.93254	10.4235	5.94209	105.929	32.5739	35.8128	11.8382	10.5659	4.68027	105.084	28.9949	45.4654	11.1286	10.2433	5.87862	87.7838	23.0527	39.8772	13.1586	13.3393
2	0	0	0.148148	1	1	0	0	0	27	2.34938e+06	1.4252e+06	-0.287566	-0.618928	1.14835	214.783	49.7715	30.211	8.92938	8.57522	3.5006	194.163	42.0791	29.0385	14.4805	16.0753	13.5483	187.102	35.6258	22.7451	9.27524	10.2402	6.35338	77.7216	33.1028	37.2886	10.6009	9.81357	4.34404	75.1015	30.8892	32.9584	10.6463	10.2794	5.8296	71.0522	24.3983	35.1873	11.004	11.8639
2	0	0	0.185185	1	1	0	0	0	27	3.20129e+06	2.42809e+06	0.595426	0.404437	1.09347	287.855	40.7405	36.4407	8.14907	7.97732	3.3074	298.434	41.6206	30.5825	13.7951	16.4079	17.0632	225.302	28.6869	27.0347	8.90469	9.78175	5.83998	87.5829	27.4032	42.4797	9.53542	10.4332	4.07371	92.8624	27.6587	39.9703	10.148	10.9323	5.69618	73.7802	18.9289	37.5138	9.78678	11.9036
2	0	0	0.222222	1	1	0	0	0	27	1.70408e+06	1.29999e+06	-0.870528	-0.70411	1.12811	331.321	45.7524	29.4878	8.51186	7.76241	3.38173	345.156	43.7872	32.6106	13.8294	17.2996	19.9889	263.786	34.6654	22.3215	8.23685	9.45507	5.16279	104.961	28.6285	40.5871	10.8887	9.57477	4.16305	107.779	24.4864	38.4287	10.9944	10.3251	6.38315	86.2306	20.5038	29.5272	11.3905	10.6749
2	0	0	0.259259	1	1	0	0	0	27	1.52162e+06	1.09978e+06	-1.02187	-0.884043	1.09151	317.468	55.3886	34.4339	10.9928	8.08972	3.01266	331.996	51.4194	33.4126	17.9756	19.2498	14.7275	257.977	39.8709	21.7844	10.3405	9.79823	6.19477	98.339	34.0243	37.7691	11.9813	10.3173	3.60909	107.545	29.9345	41.366	12.8948	11.5689	6.28589	86.7403	25.0682	27.3599	12.183	12.0774
2	0	0	0.296296	1	1	0	0	0	27	2.95341e+06	1.73103e+06	0.441119	-0.232919	1.09532	215.611	54.2049	19.3103	8.18063	9.00827	5.16237	216.01	51.079	20.4792	16.6922	17.6288	19.6186	167.197	34.1139	14.9788	8.69467	10.2273	8.34519	93.6281	32.211	27.2908	8.98332	9.2561	4.65872	91.5482	30.9909	25.2879	10.1162	10.9105	6.80332	73.9309	22.2714	25.7451	8.9423	10.5971
2	0	0	0.333333	1	1	0	0	0	27	1.70699e+06	1.46438e+06	-0.774041	-0.480033	1.13046	309.77	42.3628	25.8511	10.4386	7.57116	3.29722	308.361	42.9382	25.799	17.0123	14.558	14.0362	247.239	32.0149	24.3613	10.4825	8.2186	5.4551	114.401	26.165	37.8071	13.1168	8.2518	3.69505	114.62	25.6298	29.5757	13.2151	8.42716	4.91157	90.7269	21.563	37.7351	11.8128	8.17396
2	0	0	0.37037	1	1	0	0	0	27	3.95129e+06	3.86606e+06	1.50151	1.94129	1.1554	436.35	61.065	36.2852	19.8811	19.5123	17.2174	428.15	55.2531	39.8482	29.0316	30.2263	26.3407	374.832	51.5708	39.1799	29.7657	34.6557	36.8901	151.432	42.5155	41.4931	23.5992	22.6162	20.1573	150.773	40.3402	43.8066	29.5018	27.9353	28.1191	125.193	37.9504	61.234	41.4521	45.6712
2	0	0	0.407407	1	1	0	0	0	27	1.90876e+06	1.73228e+06	-0.509932	-0.172089	1.10735	320.667	65.0386	49.1731	8.73358	10.615	5.7254	339.132	65.4229	50.0479	12.0201	13.2931	11.7067	253.795	49.2884	34.0483	8.88583	11.5416	8.72434	119.542	42.5226	52.2413	10.2089	12.3444	6.67381	132.678	40.7214	62.4354	10.3435	11.8599	7.26536	103.171	31.7654	55.6266	9.86704	12.1827
2	0	0	0.444444	1	1	0	0	0	27	4.67555e+06	4.21343e+06	2.28805	2.32892	1.11262	423.567	60.4922	41.3219	10.4536	11.6571	11.6065	457.286	61.6303	40.3572	12.91	11.7383	14.6555	338.21	42.942	35.7357	11.1739	16.547	22.0494	138.584	36.0888	52.2588	13.1325	13.8286	15.3719	163.109	35.375	56.3638	11.6962	11.3112	13.0305	114.722	26.8749	71.041	20.0221	24.2889
2	0	0	0.481481	1	1	0	0	0	27	2.50063e+06	1.16923e+06	0.144414	-0.695841	1.15668	315.045	65.497	44.5461	12.9062	8.88859	3.74798	317.268	59.9506	40.7543	15.9744	18.7528	14.8745	257.008	44.5005	29.8331	10.1314	8.10777	4.45407	115.668	38.422	48.2	14.2842	10.7268	4.66471	116.073	34.6875	63.561	14.512	11.8732	5.32138	95.8818	30.1865	50.3969	12.0422	10.2145
2	0	0	0.518519	1	1	0	0	0	27	1.69687e+06	1.24891e+06	-0.628173	-0.596128	1.14475	280.022	68.9836	29.9884	9.67451	6.30547	3.65493	276.591	70.4125	31.5436	11.9782	10.062	9.49584	225.904	50.9965	22.824	8.59415	6.57118	3.79806	105.269	33.3947	35.8246	11.6603	8.13244	4.46447	108.695	34.3378	42.5776	9.87641	7.03379	4.62006	89.3558	24.5977	31.5049	10.2608	7.33158
2	0	0	0.555556	1	1	0	0	0	27	1.42765e+06	1.17974e+06	-0.866169	-0.645558	1.16066	269.292	65.6507	36.7418	13.3996	7.88633	2.82936	269.836	64.5114	44.4427	16.8302	12.758	11.268	224.958	46.0226	27.6682	12.2061	7.05104	3.3876	102.678	44.4921	52.6316	16.5609	9.76448	3.45514	102.593	45.046	56.1933	14.2118	8.45648	3.72769	90.0755	32.4666	39.6832	15.0448	8.00644
2	0	0	0.592593	1	1	0	0	0	27	1.76397e+06	964807	-0.498656	-0.840626	1.16428	217.06	51.1494	28.2862	7.31428	6.98239	2.8739	228.8	45.5689	28.3965	11.9518	13.0649	13.9077	168.042	31.7149	18.5148	6.75515	7.40611	3.82861	78.5836	29.4777	33.1739	8.94591	8.57205	3.32351	84.9652	27.0866	38.2904	8.62216	8.18057	3.40297	62.8271	20.0367	28.0644	7.47699	7.24655
2	0	0	0.62963	1	1	0	0	0	27	1.4472e+06	1.28319e+06	-0.784303	-0.501984	1.13073	284.343	44.4885	34.6053	9.19602	8.30938	3.49211	294.107	37.4701	31.9112	16.2761	17.4025	16.8386	221.985	32.1515	23.6596	8.12563	8.29914	4.64456	89.0444	32.3134	43.5217	11.814	10.3732	3.89367	96.3084	25.2432	42.8525	10.864	9.79569	4.65191	75.6166	24.4455	32.5439	10.1036	8.39558
2	0	0	0.666667	1	1	0	0	0	27	2.65411e+06	1.93096e+06	0.453763	0.165839	1.11626	419.15	44.873	40.9042	11.6556	9.81953	5.63882	418.19	36.7407	44.6235	19.574	22.0419	20.1687	335.699	29.9845	28.0005	11.0071	11.293	7.26682	125.871	35.529	50.8862	12.9071	11.196	5.5796	134.444	30.6542	59.0396	13.0264	11.4887	6.93736	108.481	24.9106	55.5756	12.5994	11.5874
2	0	0	0.703704	1	1	0	0	0	27	1.4784e+06	1.80431e+06	-0.690759	0.059136	1.11175	407.342	94.8212	73.9309	16.4217	10.9771	5.29368	453.893	76.3659	81.4397	23.97	24.2411	22.2665	313.203	53.8848	45.7541	13.6526	10.5357	5.9445	129.397	54.0488	73.3999	16.2623	11.346	5.26993	153.219	57.7159	104.198	16.0122	12.5029	6.78481	110.23	39.0318	70.5709	14.6863	10.4802
2	0	0	0.740741	1	1	0	0	0	27	1.9411e+06	1.91618e+06	-0.196778	0.190438	1.15731	357.01	49.8331	31.5509	11.4048	8.91648	6.32577	390.034	49.4949	37.4483	19.0705	19.4124	20.5568	280.981	37.1892	26.2555	11.8805	13.446	11.6851	115.57	33.9906	38.9459	13.1102	11.2304	7.54958	140.383	31.2392	36.6566	12.5218	11.4361	8.95215	97.3553	24.0138	32.9224	14.0786	16.9111
2	0	0	0.777778	1	1	0	0	0	27	2.6688e+06	2.38578e+06	0.562112	0.679931	1.15854	349.214	40.899	29.3752	9.50693	7.71467	3.76513	353.825	33.1401	30.6146	17.7512	21.3782	19.4636	274.399	29.809	22.2272	10.8963	10.0041	7.6244	115.071	31.7935	32.0685	10.2891	9.11482	4.63614	111.543	26.0001	29.9567	9.11632	8.36899	5.60266	99.0408	24.4613	30.1222	11.971	10.2873
2	0	0	0.814815	1	1	0	0	0	27	1.79024e+06	1.45519e+06	-0.285236	-0.230859	1.16819	433.392	66.6266	39.2459	19.3231	22.0302	21.1223	514.223	59.8483	42.0172	54.8389	131.268	161.852	320.704	50.8745	30.2375	15.8716	17.0803	15.3996	133.578	40.697	51.7579	17.7654	18.8857	12.0351	155.764	35.2224	51.422	23.7913	36.6481	35.4944	117.07	33.8324	48.7635	18.79	22.9688
2	0	0	0.851852	1	1	0	0	0	27	1.44959e+06	1.65817e+06	-0.594607	-0.008406	1.21005	591.881	61.9043	64.1313	18.811	25.4468	20.1253	730.762	72.5819	57.9204	46.4568	81.1232	122.853	466.199	41.4004	43.5483	21.0475	31.6316	40.0777	145.88	35.7135	71.1228	16.2684	18.2251	11.8676	191.66	38.9485	71.0688	18.983	26.9517	27.492	121.45	28.9877	52.594	20.4217	29.0468
2	0	0	0.888889	1	1	0	0	0	27	1.56801e+06	1.63009e+06	-0.44501	-0.016514	1.20357	317.73	46.0606	58.0615	16.4381	15.5998	16.216	343.53	36.8715	55.9925	61.7182	141.116	166.387	234.936	29.4183	44.4601	16.1094	14.4774	13.4178	117.523	34.7336	68.0744	16.7329	13.969	8.49654	116.045	30.6224	54.099	19.0869	27.6622	29.9463	93.4839	27.0629	49.8599	15.0782	13.0183
2	0	0	0.925926	1	1	0	0	0	27	2.61318e+06	1.72046e+06	0.631233	0.09436	1.14618	364.019	47.5136	45.5804	17.0066	11.3911	4.23282	393.695	43.7369	43.2195	40.6752	50.135	55.204	288.031	31.6196	40.317	15.6932	12.4534	8.62669	108.304	36.4425	63.452	18.0753	12.0653	3.89003	120.271	39.1037	62.0145	21.0765	14.8651	7.1876	98.3441	26.0481	59.8204	16.108	12.3621
2	0	0	0.962963	1	1	0	0	0	27	2.48444e+06	1.24178e+06	0.533734	-0.364658	1.16897	450.25	45.5384	45.3391	14.2872	12.6808	6.07068	441.695	37.4712	44.6339	40.9779	72.0014	80.4741	374.254	28.7604	35.7195	17.3403	15.4389	12.2058	117.663	38.062	54.9377	17.561	12.9657	5.5157	116.879	33.4836	50.7968	17.8793	16.906	9.82474	102.968	27.1858	49.0273	14.5783	12.9595
2	0	0	1	1	1	0	0	0	27	1.95395e+06	1.37436e+06	0.03439	-0.211948	1.14786	233.194	59.9224	74.414	19.1288	13.2426	4.32796	238.095	43.8527	68.0757	43.5743	69.9758	68.6903	195.192	40.4954	53.3574	21.5928	17.499	13.4363	112.704	56.0698	94.3572	19.8634	14.0408	3.61231	99.1124	46.2298	95.4454	20.4923	17.5454	7.61645	97.457	42.0573	64.9743	17.8628	12.5538
2	0	1	0.037037	1	0	1	0	0	27	1.01153e+06	2.71448e+06	-0.611251	0.828779	1.21861	242.811	65.9325	39.2138	9.94054	13.2033	6.89685	268.054	64.9429	38.3168	15.4428	16.3029	12.9542	203.427	45.3274	24.9291	8.99856	15.1732	10.5263	87.2793	32.8889	37.6867	10.6001	14.0263	7.68469	98.4753	31.2384	51.4514	12.6812	16.171	10.49	71.5046	24.9203	44.6123	13.2883	22.3277
2	0	1	0.074074	1	0	1	0	0	27	1.828e+06	2.04195e+06	0.134004	0.108518	1.16278	366.738	65.3308	54.7126	16.9659	12.7518	7.47061	417.561	58.9534	52.9239	23.9558	27.1511	26.2536	364.032	51.297	41.909	16.0206	19.4715	15.948	135.054	42.608	63.2322	17.4004	14.7999	7.78776	136.718	41.3381	73.984	18.683	17.3252	13.2362	121.421	34.9215	61.9608	20.4238	29.024
2	0	1	0.111111	1	0	1	0	0	27	1.25834e+06	1.52947e+06	-0.506789	-0.452152	1.15093	243.2	49.7768	41.9998	13.7727	12.7044	6.78953	317.763	48.9412	45.3924	25.459	40.806	40.4114	239.814	34.0059	32.1185	15.5022	17.9877	12.6189	112.282	40.5831	54.6288	15.4318	14.2079	6.7659	125.037	37.645	49.8333	16.413	19.0635	11.8305	88.2228	26.1809	46.326	18.7158	22.764
2	0	1	0.148148	1	0	1	0	0	27	1.72714e+06	1.37532e+06	-0.108975	-0.655236	1.21096	171.031	53.0802	22.7001	9.89075	13.0857	8.48475	208.804	46.08	31.1887	41.0774	76.2499	101.42	153.18	32.1874	16.0824	15.8733	29.2834	24.6994	77.6522	37.9158	27.1339	9.73384	12.226	7.49443	77.9956	33.6814	26.2674	12.8003	18.0009	16.4441	60.1199	24.7457	21.3798	14.5573	24.7533
2	0	1	0.185185	1	0	1	0	0	27	1.96262e+06	1.2575e+06	0.055392	-0.821352	1.20994	217.815	60.5247	43.6249	14.9857	13.9729	7.7363	277.056	56.1172	48.4827	43.1809	63.2599	69.5565	193.874	40.5218	29.9464	18.8864	22.6724	15.6247	94.959	38.6499	52.7366	15.0433	14.6716	7.37405	100.016	37.614	56.8857	17.1909	17.3461	12.6178	75.2308	27.8873	41.2819	17.3064	23.0425
2	0	1	0.222222	1	0	1	0	0	27	2.68522e+06	2.88246e+06	0.7074	0.7527	1.45892	255.844	59.4246	52.8074	19.1223	22.7918	23.3672	314.796	52.1092	58.5367	53.9332	100.253	114.389	256.183	42.7336	44.7521	21.5084	28.1567	30.6779	100.584	37.0973	56.6783	17.3791	19.6798	16.0106	110.566	36.1336	56.6773	27.3106	35.9862	39.7687	86.981	29.1616	47.4102	22.0639	29.1192
2	0	1	0.259259	1	0	1	0	0	27	2.75883e+06	2.04439e+06	0.710282	-0.13556	1.63977	431.487	72.9788	61.1029	26.5733	54.3187	52.1838	569	69.7785	62.6169	45.5344	127.279	138.335	414.221	54.3792	56.8727	40.6411	111.259	133.733	170.883	48.1256	73.4475	20.6512	28.3536	25.436	179.346	42.5403	80.7144	23.7266	45.6001	48.3377	140.682	38.3241	69.905	22.1714	42.7812
2	0	1	0.296296	1	0	1	0	0	27	1.97585e+06	1.81463e+06	-0.143791	-0.413715	1.64728	336.749	59.0332	46.6699	14.4347	16.7745	9.30249	446.401	58.2715	53.4024	49.5906	97.7974	114.28	294.868	40.7532	33.8602	14.5853	24.2822	16.6561	121.842	39.288	50.8129	13.6401	17.6491	8.06879	140.413	38.216	70.3791	17.2919	22.4151	15.8114	100.297	27.7484	48.2573	13.8704	21.8969
2	0	1	0.333333	1	0	1	0	0	27	1.95963e+06	2.37013e+06	-0.23125	0.094154	1.58266	296.353	51.3595	51.1741	38.172	101.977	145.668	407.215	51.5137	57.3298	80.8042	262.589	281.649	273.401	34.3729	42.8242	50.4127	157.474	256.264	114.846	31.3991	57.6712	21.3459	45.377	47.2705	136.251	31.0961	51.599	29.8268	87.7601	93.3299	96.3999	24.5269	50.1672	24.5509	65.6587
2	0	1	0.37037	1	0	1	0	0	27	1.66673e+06	1.72297e+06	-0.595923	-0.597947	1.25907	334.644	55.0082	33.6578	13.3823	14.3482	6.83467	421.18	45.0545	37.2214	54.3659	119.782	112.059	321.157	39.0575	27.1134	19.07	24.0834	19.4956	114.856	40.7335	45.0796	14.5124	12.6283	4.79626	112.448	33.2808	39.1489	14.462	20.7025	11.9044	97.8697	30.6153	41.4849	13.8036	11.8079
2	0	1	0.407407	1	0	1	0	0	27	3.01215e+06	2.50242e+06	0.67827	0.133779	1.2023	269.926	56.117	49.017	13.6779	12.8742	6.7727	321.171	49.4143	47.5127	49.7123	80.1606	99.1925	236.563	38.3752	30.6105	19.2999	22.845	19.0604	101.623	35.0813	50.0348	15.3229	12.9495	5.30883	103.794	32.2549	53.3207	16.6327	17.2117	10.8336	84.8417	26.8025	42.111	13.2875	12.2943
2	0	1	0.444444	1	0	1	0	0	27	2.08395e+06	2.73392e+06	-0.321063	0.317099	1.19033	199.354	55.4405	55.8863	15.4042	11.0623	6.47457	275.739	47.1662	56.5132	62.7606	84.6512	105.448	185.499	42.6176	45.0885	20.2996	28.1909	19.9063	92.5978	41.0194	66.0001	14.4317	11.3424	5.0043	91.1981	36.5561	58.1563	17.8541	15.8098	10.7375	66.6575	32.646	53.9381	12.1463	13.1808
2	0	1	0.481481	1	0	1	0	0	27	2.39553e+06	1.76734e+06	-0.080359	-0.698961	1.30268	239.55	61.7177	42.9499	13.0683	13.3166	9.89424	319.675	55.9739	49.9361	49.9102	134.635	162.782	237.905	39.8487	32.6538	18.914	28.3075	27.619	106.387	32.251	55.2357	12.9929	12.498	7.19224	107.781	35.3001	57.9474	15.0391	19.5883	18.7747	87.971	22.4597	45.2324	13.5193	16.3418
2	0	1	0.518519	1	0	1	0	0	27	2.61078e+06	1.87379e+06	0.064898	-0.646434	1.84111	295.526	63.1762	56.6042	19.0626	17.3456	11.4466	391.677	64.964	64.5951	66.2884	141.446	181.294	298.596	39.484	42.2235	30.9154	38.2047	43.6204	125.902	45.1407	71.9077	17.7565	15.6287	8.20125	124.374	46.4272	81.5907	24.4089	28.5099	22.9495	103.016	29.5719	54.0935	16.9021	21.0585
2	0	1	0.555556	1	0	1	0	0	27	1.69286e+06	3.07006e+06	-0.925433	0.508103	1.2096	254.269	65.5762	58.7784	18.0727	15.9003	10.5323	346.208	56.0119	64.6009	79.7459	184.058	227.448	236.874	41.3817	44.8909	34.1374	41.2932	34.8165	105.273	39.8409	64.8846	17.8066	14.9681	7.02489	121.729	40.3568	66.012	21.3189	25.7534	23.4997	88.4566	31.4291	52.0515	19.4288	21.612
2	0	1	0.592593	1	0	1	0	0	27	2.50104e+06	3.90538e+06	-0.188213	1.29438	1.28	167.505	57.2041	53.8062	17.3413	13.2681	7.68315	244.79	52.1913	63.2105	67.0003	98.2296	125.447	165.723	37.7539	42.7236	24.0857	26.9613	24.7222	84.6647	37.4952	57.5103	17.3737	12.5453	5.1974	76.7905	35.1984	60.4477	22.2625	20.6463	14.7327	65.6213	29.1727	48.8776	17.3969	15.2921
2	0	1	0.62963	1	0	1	0	0	27	2.09121e+06	1.60403e+06	-0.669372	-1.05417	1.17376	212.836	48.7511	41.1386	13.9628	17.1717	13.1235	291.124	51.4308	53.979	63.206	177.25	201.137	216.635	33.902	35.6626	27.0988	59.0097	80.3207	98.4464	35.9856	60.5879	15.8943	16.5302	8.87549	100.063	39.8312	62.6856	20.1303	27.3942	22.539	76.7153	24.5891	49.8236	15.2504	24.292
2	0	1	0.666667	1	0	1	0	0	27	2.133e+06	2.23434e+06	-0.698558	-0.472845	1.23801	274.587	69.3228	82.8377	40.6844	65.2582	65.2997	372.987	65.2622	95.4168	103.466	300.681	299.47	239.318	47.952	66.4658	73.0426	140.696	173.783	111.172	54.3387	93.854	28.607	35.5232	29.4968	131.264	54.3034	95.5301	41.326	83.7016	72.1075	93.9356	37.1257	72.2843	32.9367	53.6796
2	0	1	0.703704	1	0	1	0	0	27	2.30661e+06	2.07155e+06	-0.59588	-0.684798	1.31995	314.515	66.7832	42.8218	25.1158	40.953	57.8804	437.26	62.922	52.1341	87.5443	178.078	211.59	317.513	42.254	36.2623	44.0477	104.12	201.396	129.909	48.5372	50.3656	17.6465	21.7331	22.955	136.403	50.733	50.4799	24.6078	45.3412	46.8441	116.118	32.8468	41.7796	20.1042	30.3683
2	0	1	0.740741	1	0	1	0	0	27	2.07552e+06	1.59816e+06	-0.898118	-1.20629	1.3004	268.058	87.6996	83.52	24.3906	19.2949	10.8612	450.056	70.3395	79.0488	80.2947	153.789	149.105	285.588	55.4309	62.0438	34.8974	50.0806	49.9647	133.014	62.7644	97.3939	24.2076	17.0148	8.66603	147.358	62.8364	96.1897	27.6869	29.0543	19.9403	111.559	44.2101	61.9349	23.9278	24.9653
2	0	1	0.777778	1	0	1	0	0	27	1.91523e+06	1.83319e+06	-1.12966	-1.01884	1.22927	252.219	99.1659	68.2945	18.1563	10.877	5.12595	349.313	77.5401	61.5195	43.3495	61.2202	62.4948	218.705	66.4864	49.3319	22.2732	19.4955	17.9998	107.391	68.2942	85.2503	19.3774	11.0577	4.41408	111.711	62.1469	78.7389	20.8808	13.7878	8.26081	83.1633	53.9316	63.4774	17.9428	11.7748
2	0	1	0.814815	1	0	1	0	0	27	4.87419e+06	3.57688e+06	1.75859	0.674552	1.42116	306.053	69.9782	42.7144	21.8677	24.6394	18.1495	446.692	69.8899	49.6134	42.3614	58.861	65.4623	316.654	54.5444	53.7936	40.8428	53.0211	50.8761	138.141	39.2471	47.8623	24.6518	27.6139	19.5331	154.964	40.9539	47.4548	27.222	28.3779	24.4621	114.843	35.176	67.8761	41.3185	62.9836
2	0	1	0.851852	1	0	1	0	0	27	1.67092e+06	1.49392e+06	-1.51574	-1.45699	1.44708	379.617	54.5479	45.111	19.516	12.884	8.38014	466.889	51.3819	50.02	58.7009	83.0827	111.455	333.601	41.5485	38.947	22.3643	19.2533	16.9039	116.533	39.7555	55.193	21.8518	12.452	7.2071	128.993	37.9491	53.6399	20.9621	17.2155	13.5692	95.6398	30.2759	57.9794	19.4523	15.0861
2	0	1	0.888889	1	0	1	0	0	27	1.90005e+06	1.28353e+06	-1.3575	-1.71678	1.55128	335.286	59.4578	48.0319	20.2218	15.2538	15.5452	401.666	46.5245	48.2296	67.7861	132.638	191.639	296.013	45.1011	37.7439	30.9524	42.1719	69.4582	111.449	43.6647	52.3366	21.8341	14.0084	11.725	119.467	36.1714	53.0285	21.6038	20.8876	25.6117	98.3785	34.7027	43.1764	20.8736	17.2273
2	0	1	0.925926	1	0	1	0	0	27	1.92335e+06	2.22729e+06	-1.40548	-0.820433	1.46587	310.846	78.8843	50.3303	19.5588	17.6678	10.4507	381.936	63.8338	52.636	69.3264	162.91	160.204	296.623	53.9934	42.9874	31.5607	46.0047	40.4131	105.167	56.614	73.5914	20.9244	15.339	8.17933	107.164	50.4424	67.5209	23.4864	24.4951	19.4483	88.1399	37.9515	60.7183	18.7848	17.5961
2	0	1	0.962963	1	0	1	0	0	27	9.14503e+06	8.64232e+06	5.74685	5.5374	2.31931	406.402	46.8503	51.2462	18.5336	26.0696	31.2871	474.137	47.2941	57.8181	50.7254	90.754	130.252	420.543	43.0673	64.1303	34.0263	64.3393	99.1197	142.692	34.3278	57.0322	20.6963	28.8294	31.5131	157.683	30.9261	53.5699	21.3233	37.4532	42.2066	131.705	26.7945	65.438	32.4252	58.32
2	0	1	1	1	0	1	0	0	27	4.6108e+06	4.55827e+06	1.14029	1.41118	1.72893	297.796	93.5421	65.6914	24.0783	23.6394	13.1975	422.567	85.7329	74.7246	103.593	308.708	297.989	303.429	57.637	50.367	39.2134	71.8692	69.7577	118.192	61.1701	65.4862	20.6207	18.4284	9.25553	121.223	60.2278	72.7858	29.2683	43.3295	29.4805	97.1711	46.3846	54.9981	20.8463	29.8314
2	0	2	0.037037	1	0	0	1	0	27	1.54042e+06	1.8907e+06	-0.585676	-0.469415	1.16301	317.77	51.506	33.2983	13.3255	10.2972	6.58606	353.379	51.5875	40.5861	29.9309	49.1526	49.6197	251.203	37.5097	23.1561	12.5712	13.3476	13.0584	96.6313	32.7327	36.8058	13.013	12.5065	7.01163	113.47	33.3049	48.6602	14.8242	14.6574	11.4159	82.5787	24.4817	37.5337	12.0986	18.5421
2	0	2	0.074074	1	0	0	1	0	27	1.59047e+06	1.39342e+06	-0.575963	-0.986842	1.16071	525.323	47.5077	41.1118	14.4694	10.6682	6.29865	548.829	48.6123	44.344	25.9235	35.5335	38.4737	418.487	36.4903	27.7876	14.8491	14.8996	11.9021	141.515	33.7744	52.1391	14.99	12.3162	6.88001	155.649	33.9748	54.0257	14.0257	11.3758	8.29728	123.947	26.0809	46.0388	16.1377	18.7244
2	0	2	0.111111	1	0	0	1	0	27	2.01916e+06	1.96817e+06	-0.187584	-0.432323	1.16618	474.669	69.5308	63.6502	32.9303	96.7225	155.016	581.812	70.6373	63.6874	86.8476	297.861	410.875	375.97	42.6774	47.155	48.9605	202.035	298.393	148.781	38.7776	67.6277	21.2617	39.5864	51.06	162.6	37.2669	73.6544	30.7512	81.7542	115.319	120.356	26.4707	52.6497	25.4597	57.8341
2	0	2	0.148148	1	0	0	1	0	27	1.34573e+06	1.54633e+06	-0.90132	-0.874406	1.17332	446.06	79.3581	38.0476	10.1799	7.41017	4.11079	487.262	81.5688	45.1833	24.3892	33.5797	36.2276	335.405	54.3848	27.0006	9.88991	9.24159	6.70386	132.225	41.4998	43.069	10.3449	7.66905	4.12588	141.469	39.29	38.4683	9.95179	8.36666	5.84347	118.896	28.4757	35.0279	10.8527	8.61714
2	0	2	0.185185	1	0	0	1	0	27	2.80837e+06	1.92253e+06	0.521127	-0.519062	1.23962	542.115	54.2268	43.8788	17.5596	17.9707	9.25957	639.808	53.8903	52.4266	52.95	89.2266	96.0023	388.868	38.8829	30.177	17.1042	25.5822	17.4811	128.534	37.0058	57.1711	19.3074	18.7303	8.47476	145.429	34.894	74.7825	21.8908	24.2064	14.9432	108.141	27.807	49.5135	19.3495	26.075
2	0	2	0.222222	1	0	0	1	0	27	1.14256e+06	1.09045e+06	-1.18511	-1.37082	1.19142	379.317	44.7335	31.626	10.701	12.6276	5.69837	435.427	42.4794	32.7465	39.6524	75.3013	85.7187	286.484	35.3665	23.369	13.055	18.5879	12.3975	107.51	26.6035	47.0209	11.3525	13.022	4.75213	119.068	21.8404	41.3467	14.1017	14.8842	9.48391	90.2587	21.3671	45.5363	12.0566	16.9764
2	0	2	0.259259	1	0	0	1	0	27	1.52009e+06	1.56261e+06	-0.847949	-0.91859	1.16918	626.098	75.5636	44.3055	12.9492	10.6198	7.59084	651.427	73.4175	47.2909	38.6359	76.19	94.832	476.599	51.0592	30.6866	15.5047	21.6361	21.8345	187.361	41.2313	45.382	12.8577	11.1492	7.46722	199.59	40.7513	44.6903	14.8124	15.4921	13.5268	147.676	30.1059	34.1566	14.2002	17.5453
2	0	2	0.296296	1	0	0	1	0	27	2.25559e+06	1.94518e+06	-0.151526	-0.562506	1.77552	512.245	56.9873	51.7713	21.4134	15.1712	10.1852	568.136	53.8614	62.395	72.5791	135.326	161.046	387.986	37.8888	36.551	24.1934	26.3243	22.8851	144.541	40.6153	72.7349	22.9812	15.6719	9.10258	164.526	37.2344	80.8985	25.3622	23.8509	20.0648	126.818	28.7812	57.2643	23.4514	26.2928
2	0	2	0.333333	1	0	0	1	0	27	1.79198e+06	1.56434e+06	-0.6564	-0.958752	1.31825	339.962	66.2976	56.309	15.4815	14.3329	6.74377	396.668	59.3039	57.4487	55.1005	77.0486	84.0157	241.139	44.2077	44.5153	20.0115	23.5429	15.4155	97.9136	47.6747	68.5022	16.6054	14.2981	5.99535	109.567	44.2533	72.4221	19.7224	19.6638	11.4105	73.9978	33.9984	54.2651	18.339	18.9883
2	0	2	0.37037	1	0	0	1	0	27	3.64425e+06	2.10384e+06	1.15526	-0.438005	1.18267	411.576	68.4545	33.9832	16.1078	13.916	10.0933	446.895	59.6648	40.4977	50.6892	89.2458	102.817	298.202	45.3847	26.1033	25.414	45.014	48.4646	139.601	42.3559	52.9002	17.1509	14.1396	9.103	142.966	39.6793	51.2289	20.517	18.1582	14.8961	100.06	32.3777	39.8309	19.208	22.0163
2	0	2	0.407407	1	0	0	1	0	27	2.04874e+06	1.92883e+06	-0.480687	-0.632571	1.12313	479.703	96.2499	53.6493	15.9563	14.337	9.49535	500.761	94.9537	62.3824	49.2002	74.7412	75.6695	360.562	57.6985	40.4901	21.2005	25.1662	20.9212	154.259	55.5152	63.6517	15.1438	14.8717	8.8996	156.958	55.0914	65.2244	17.7292	20.725	14.5642	120.822	37.3011	53.3013	17.9366	20.3744
2	0	2	0.444444	1	0	0	1	0	27	1.65825e+06	1.01841e+07	-0.911442	7.60228	1.15233	369.166	56.695	35.3014	11.2723	10.126	5.44368	395.001	54.6312	38.9252	31.4237	50.5922	48.8508	284.902	40.7128	27.5585	12.5647	16.1201	11.076	107.082	35.9347	38.7234	12.3791	10.6639	5.24156	109.258	30.4868	36.3718	13.1579	12.3163	8.08592	88.0509	26.3505	37.0917	13.7484	15.5877
2	0	2	0.481481	1	0	0	1	0	27	1.99602e+06	2.50307e+06	-0.613542	-0.101271	1.37384	266.674	59.5861	51.0768	15.7765	12.2765	7.3815	327.538	42.203	56.2208	46.0587	77.5941	82.3556	211.551	45.4363	41.8605	24.5022	36.5612	45.2402	112.267	44.8049	65.0436	16.7796	11.4298	5.99387	110.315	35.2208	58.4019	17.4523	14.8412	10.6983	96.4395	39.0706	51.5202	18.833	18.2755
2	0	2	0.518519	1	0	0	1	0	27	2.1415e+06	1.7551e+06	-0.508958	-0.866549	1.09886	506.307	65.7387	54.9892	16.597	13.6898	8.11086	523.385	58.8516	53.2985	37.1707	41.4968	52.5023	395.028	46.0267	43.0129	17.1578	26.2857	19.0308	127.628	45.4079	60.7136	16.9545	14.2235	8.00656	138.393	40.4243	57.613	16.3027	14.3395	9.99313	118.278	35.4031	55.6365	16.4887	28.2569
2	0	2	0.555556	1	0	0	1	0	27	6.90348e+06	6.4376e+06	4.2127	3.79575	1.10204	470.558	68.7994	41.596	19.2389	19.7583	19.2841	536.096	70.8558	43.4825	44.6093	52.7007	60.7124	365.879	47.8786	44.3335	29.7655	41.4059	44.5952	135.375	42.7231	46.4261	19.8971	23.3815	20.204	158.774	44.326	44.0007	26.2692	25.7673	23.7321	118.908	35.817	59.176	35.1888	46.8306
2	0	2	0.592593	1	0	0	1	0	27	6.26182e+06	5.68073e+06	3.53076	3.01851	1.12104	475.916	73.5609	58.8614	31.2938	32.2499	25.0231	539.985	77.9716	59.428	56.3337	59.7285	65.0208	378.878	52.5826	75.6514	49.6019	71.6713	68.0383	170.85	47.5969	63.752	32.8839	36.3526	27.5879	179.994	45.9797	61.9007	40.6133	37.9168	31.9303	140.615	40.9796	93.112	58.8587	78.4404
2	0	2	0.62963	1	0	0	1	0	27	2.63362e+06	2.84074e+06	-0.137771	0.158383	1.11779	280.716	75.7332	37.3488	11.874	10.318	4.31851	319.003	72.8573	33.0838	21.8827	34.8713	35.2364	208.222	48.5436	23.1105	10.3951	11.5316	5.00085	96.2872	46.5312	34.3495	13.2539	12.0811	5.02599	102.1	45.7222	31.4879	12.2521	10.6008	6.83221	80.5899	32.4432	28.2617	11.3537	10.8125
2	0	2	0.666667	1	0	0	1	0	27	3.2806e+06	2.35719e+06	0.468878	-0.345294	1.11399	367.114	46.1595	35.4961	14.6066	8.44493	4.7135	411.519	44.0561	41.0089	38.7095	54.0675	57.5825	273.493	31.1263	26.6141	13.6358	10.7528	6.5408	110.692	35.3012	38.3861	16.0716	10.1274	5.09476	116.412	31.6015	37.3418	15.4063	10.8039	8.28412	91.9171	26.1918	34.2095	13.723	10.404
2	0	2	0.703704	1	0	0	1	0	27	2.64258e+06	1.71475e+06	-0.209437	-1.00806	1.12832	329.69	57.8754	24.2965	9.92423	10.6608	5.78074	396.274	48.7321	30.4196	39.3256	68.0592	85.6164	236.916	38.3156	18.4573	10.1212	15.8154	11.577	107.36	37.3776	33.115	11.0624	11.7906	5.48284	120.895	32.2533	37.0754	13.6849	13.2272	9.46592	79.5305	26.2613	29.4782	11.0477	16.1415
2	0	2	0.740741	1	0	0	1	0	27	1.91834e+06	1.60045e+06	-0.974127	-1.14191	1.0698	238.301	63.6532	53.0462	13.3212	9.52015	4.97469	250.567	54.4606	52.6196	28.3868	48.5298	41.01	176.671	45.0768	39.8885	13.7317	14.3216	9.19731	105.438	43.0201	59.4623	14.2368	10.8616	5.12268	103.635	37.8251	48.0917	12.4999	11.9803	6.74653	78.1839	32.092	47.1835	13.9897	11.6626
2	0	2	0.777778	1	0	0	1	0	27	7.50477e+06	6.59734e+06	4.57195	3.83498	1.05316	588.393	60.0358	61.4771	23.0534	22.6982	21.4629	658.896	57.8901	62.1314	43.7714	72.4241	83.2581	423.008	40.2143	43.5381	35.1624	44.6076	49.7484	175.656	40.1373	74.1486	27.2224	28.0212	24.46	200.26	39.5495	73.8117	26.2279	27.2491	27.6592	138.939	31.207	66.4844	44.1767	68.4466
2	0	2	0.814815	1	0	0	1	0	27	1.86872e+06	1.41031e+06	-1.10438	-1.37251	1.08085	409.49	64.5444	49.0257	14.0248	12.6997	4.73061	460.694	53.5888	49.2426	43.6085	69.0949	66.7582	376.334	40.8487	35.7247	13.6077	14.3734	8.04971	103.062	48.5418	58.2966	16.8062	12.9375	4.55183	112.297	46.5335	51.7476	17.3567	17.1708	8.24757	90.1009	34.0882	44.5721	14.6328	12.3525
2	0	2	0.851852	1	0	0	1	0	27	1.74742e+06	1.38319e+06	-1.266	-1.4198	1.08198	338.564	62.2655	50.1013	12.422	10.61	6.30448	399.372	61.4973	54.0382	46.3019	82.7765	104.24	236.471	41.0839	35.8601	12.5201	14.5223	10.102	115.862	39.9694	62.4674	12.2566	10.9159	6.21633	130.321	38.4372	60.2845	13.7637	16.4296	12.7151	89.9037	28.7523	48.9347	13.7398	16.4472
2	0	2	0.888889	1	0	0	1	0	27	2.11195e+06	1.67653e+06	-0.941728	-1.14698	1.11469	336.309	85.6319	42.8363	23.5879	12.9994	7.87585	368.247	75.5056	53.117	58.8855	70.6461	89.9077	257.831	51.7619	38.8727	19.4968	17.3127	12.8141	112.671	58.2173	54.4925	22.8701	13.3835	6.91009	114.271	57.8657	58.0095	24.0638	16.8787	12.9241	94.3272	41.9945	46.8331	19.6765	13.6389
2	0	2	0.925926	1	0	0	1	0	27	1.67935e+06	2.00455e+06	-1.41478	-0.838442	1.04909	310.401	60.789	62.0847	16.7334	10.6951	5.88519	324.016	54.0255	55.5636	51.7135	73.8791	84.5693	252.763	41.8891	44.5061	18.863	15.0657	11.0899	99.9436	49.6812	68.1375	16.9235	12.4842	5.41531	95.9149	48.4369	58.8933	17.8512	15.6273	10.1755	90.7342	38.6396	50.6273	18.1953	18.7182
2	0	2	0.962963	1	0	0	1	0	27	1.57717e+06	1.08396e+06	-1.55718	-1.77975	1.10218	230.977	54.4094	55.6996	14.6373	11.3413	5.57853	255.55	44.8915	52.1637	48.7306	74.1679	71.6157	178.641	35.5544	47.1458	15.8218	17.3949	15.9104	92.8675	40.787	71.0945	14.4826	11.79	4.75981	86.8987	33.1168	61.3286	18.2788	15.7543	8.96342	70.5255	28.4262	52.7624	12.9442	11.6251
2	0	2	1	1	0	0	1	0	27	3.62142e+06	2.88071e+06	0.44682	-0.003554	1.13905	452.307	65.8669	47.8711	14.0082	10.281	6.71884	499.318	58.9662	49.9693	31.6975	47.2001	56.5686	348.477	41.6122	32.7833	17.3356	17.4796	16.6678	105.798	42.5702	53.7009	14.3954	11.1493	6.70436	121.047	43.3923	50.5208	15.4408	13.9873	9.67241	100.563	29.5454	44.6438	16.2969	17.6606
2	1	0	0.037037	0	1	0	0	0	27	1.69665e+06	1.70792e+06	-0.564159	-0.466415	1.31363	320.145	46.8491	36.4402	12.2962	7.967	2.72403	265.549	38.6008	41.0461	21.6156	27.4895	19.5968	272.953	28.6384	22.4595	11.7995	12.8827	6.8817	127.7	34.1997	43.8091	13.2878	8.4281	2.86186	104.86	28.9862	45.3565	11.7244	6.92828	3.11402	111.511	23.5055	30.9655	11.9197	7.47111
2	1	0	0.074074	0	1	0	0	0	27	2.39454e+06	1.58281e+06	0.113974	-0.598831	1.32778	259.57	31.0795	33.768	12.3404	14.1528	7.54958	217.439	23.5486	33.4416	27.6706	59.5777	49.0562	217.581	26.4036	29.6425	19.4917	26.7424	20.6212	115.01	27.3378	49.2664	14.1265	12.3143	6.52234	91.7969	20.2638	38.7811	11.4824	11.3153	7.56072	91.2671	22.9286	37.2034	16.5191	17.7989
2	1	0	0.111111	0	1	0	0	0	27	2.18927e+06	2.66183e+06	-0.111232	0.473789	1.25588	314.481	46.5799	40.2812	18.6299	11.4883	5.67718	312.995	41.6308	53.8942	43.1407	48.3811	46.1065	272.547	35.5842	34.7314	23.7082	39.5718	38.1469	110.464	37.8744	54.2169	18.9476	10.5609	4.9935	103.991	33.1607	59.3498	17.7025	8.91752	5.46213	95.5465	27.611	43.1247	15.5693	15.3114
2	1	0	0.148148	0	1	0	0	0	27	2.94864e+06	3.13228e+06	0.628442	0.936628	1.29885	265.28	54.4171	32.2391	10.5943	10.0073	7.32777	268.056	52.4051	39.5693	21.1279	26.3767	26.9326	234.979	45.2921	29.3044	15.0594	14.9891	11.3904	90.8089	32.562	33.6593	10.9303	10.9083	7.97872	94.0171	30.27	32.1644	10.3797	10.3345	8.89681	84.8248	26.9603	30.2697	14.4463	12.1608
2	1	0	0.185185	0	1	0	0	0	27	3.37401e+06	3.26026e+06	1.03408	1.0572	1.32293	437.223	71.3782	66.1454	18.7446	20.7617	11.8063	388.414	62.4308	68.1594	28.4186	36.8348	31.939	404.849	53.6412	63.4276	27.5435	59.2435	39.8467	138.176	44.2922	74.563	21.0365	22.6625	12.4812	118.673	38.8496	62.6103	18.1313	18.3376	11.3506	140.455	39.7644	88.2181	33.3887	58.5557
2	1	0	0.222222	0	1	0	0	0	27	1.74132e+06	1.40703e+06	-0.618373	-0.803293	1.3328	239.727	58.175	32.885	11.2461	10.0212	5.26726	229.631	55.5627	41.4459	20.8837	27.4884	19.6621	196.214	43.9888	25.0524	10.6787	12.6697	14.534	83.6536	43.941	38.754	13.6151	10.4182	5.74381	80.5618	38.3037	44.7369	13.3735	8.38827	5.5974	71.9056	35.2691	39.3216	10.5245	10.2068
2	1	0	0.259259	0	1	0	0	0	27	1.60729e+06	1.82475e+06	-0.772035	-0.393494	1.40653	209.959	49.1395	17.3	9.51903	6.61379	2.42177	204.763	44.533	22.3747	21.9149	19.588	18.6233	171.541	36.4401	14.9066	8.78059	7.48077	4.10008	105.853	31.1149	21.9547	10.0591	7.74274	2.78544	99.2275	28.3081	23.8025	9.0186	7.10746	3.01741	82.3106	23.6684	25.2067	9.0599	6.35651
2	1	0	0.296296	0	1	0	0	0	27	2.36791e+06	2.16007e+06	-0.031447	-0.064077	1.28578	323.206	45.8167	40.112	12.807	8.73814	3.15034	290.681	40.322	42.4759	26.8709	30.8059	22.225	264.979	34.3974	33.4121	13.0167	10.7219	7.05333	98.9162	33.4931	48.258	13.4863	9.16919	3.22086	90.8398	26.8074	43.7054	13.0387	8.38446	3.76872	83.8939	25.9339	39.9967	11.6462	8.42392
2	1	0	0.333333	0	1	0	0	0	27	1.77862e+06	1.63824e+06	-0.637776	-0.60693	2.61691	216.663	31.7337	21.7766	7.7439	8.65486	2.56874	197.829	26.6852	26.4818	25.4119	34.2578	31.3658	170.884	22.6362	15.5137	7.00907	8.8025	4.46265	105.344	29.2129	29.1116	7.74873	9.14685	2.60084	94.3307	25.1774	44.2912	8.81425	8.55261	3.16292	77.1441	19.9047	25.3441	6.11927	7.43243
2	1	0	0.37037	0	1	0	0	0	27	2.4716e+06	2.17344e+06	0.032721	-0.065242	1.30687	232.488	36.8953	36.5414	14.6257	8.44306	2.93009	212.651	34.3995	37.2757	33.8286	34.8093	31.2592	189.426	26.4505	30.684	14.9298	10.8712	6.00627	118.424	31.0604	44.2223	14.6287	8.46225	2.79245	97.0701	26.3684	43.3487	12.9072	6.91984	3.39689	87.5078	23.5425	39.3138	12.7892	6.8975
2	1	0	0.407407	0	1	0	0	0	27	2.17845e+06	1.81414e+06	-0.280209	-0.43176	1.31275	221.77	57.9986	48.7532	18.0046	9.18732	2.99504	193.806	57.0754	52.6639	39.7498	33.3841	24.0276	177.926	39.789	40.1545	16.3825	10.9436	6.0123	97.6026	40.6269	55.6622	19.677	9.50835	3.00332	84.2184	40.9709	56.9563	20.717	8.70979	3.88711	77.3446	31.6715	56.5003	16.0455	8.42722
2	1	0	0.444444	0	1	0	0	0	27	4.14623e+06	4.06894e+06	1.66757	1.81702	1.20375	326.633	46.9508	69.5446	16.2256	23.4989	24.8233	315.032	46.8075	73.1654	38.5803	58.0251	65.613	299.789	40.7173	105.95	29.3057	52.2734	65.2654	114.401	30.0585	67.6561	16.3264	24.3571	25.1329	111.885	28.7098	62.9782	21.9569	37.4408	29.2644	113.417	25.5882	116.765	30.7527	52.286
2	1	0	0.481481	0	1	0	0	0	27	995161	743089	-1.50317	-1.51657	1.25968	258.137	52.7274	23.0735	8.78492	5.53384	2.53726	233.257	53.0787	34.4343	15.57	14.2187	9.0505	214.629	38.4111	14.7048	9.62646	9.13957	7.43582	101.372	40.9049	32.6393	9.8694	6.62347	3.17003	84.5102	36.3913	35.5036	8.87363	5.46461	3.01594	81.8607	29.0843	22.8931	11.4635	9.7502
2	1	0	0.518519	0	1	0	0	0	27	2.8733e+06	2.41273e+06	0.355253	0.145587	1.29062	268.97	44.8289	25.0771	9.92699	6.58157	3.31801	235.884	40.2819	29.3614	19.3759	20.5259	16.2484	228.986	31.1129	17.3028	10.7091	8.26774	6.13203	106.277	28.6103	38.0762	11.1993	7.20732	3.71608	92.3993	24.2732	32.8973	9.83074	6.12366	3.74173	88.1005	21.0432	24.1719	11.377	7.99567
2	1	0	0.555556	0	1	0	0	0	27	1.86149e+06	1.46676e+06	-0.676419	-0.807187	1.25717	149.119	37.7755	27.1054	10.6098	8.34856	3.3184	133.48	35.2181	25.7963	25.3473	37.8362	32.5634	122.803	28.1749	20.2237	10.6963	10.5353	5.88171	79.8925	31.8563	40.3322	11.4772	8.57695	3.56285	63.9306	27.1892	45.3301	10.4796	7.50664	4.10197	59.5968	21.0789	42.9691	11.1875	9.25159
2	1	0	0.592593	0	1	0	0	0	27	2.2341e+06	2.34799e+06	-0.323636	0.067129	1.23347	368.537	62.2769	47.311	13.4732	7.2567	3.77188	338.122	57.249	48.5078	23.9921	23.8747	19.2231	305.554	47.0111	31.6943	11.1548	8.46579	6.81605	120.395	38.553	62.5769	13.9563	9.00622	4.32913	106.442	35.1235	56.3145	14.3331	7.50393	4.32601	107.137	28.7289	40.989	12.8129	10.768
2	1	0	0.62963	0	1	0	0	0	27	2.47074e+06	2.68227e+06	-0.106716	0.393927	1.26505	318.449	67.2	60.002	21.8576	22.8345	18.9884	279.887	50.4069	61.8875	31.7468	39.6719	31.7328	278.737	52.5276	58.0642	34.852	52.3518	67.1051	106.057	43.3078	69.3959	19.6414	22.648	18.5742	93.2242	31.3977	67.5425	20.5732	24.6107	17.8485	97.8259	39.1555	81.0389	29.3106	48.8766
2	1	0	0.666667	0	1	0	0	0	27	4.28416e+06	3.96263e+06	1.68707	1.66637	1.33791	330.011	41.4255	41.065	11.4506	15.0852	14.9585	322.781	37.5102	43.367	24.325	25.5667	25.8111	274.794	36.6497	48.1273	17.5887	37.5271	49.0521	117.074	29.4836	45.8566	11.9723	15.7744	15.5654	111.656	24.4882	40.5083	13.1001	13.9222	16.9832	104.399	28.4371	62.058	19.6886	38.9151
2	1	0	0.703704	0	1	0	0	0	27	1.69839e+06	1.563e+06	-0.918528	-0.740199	1.31727	192.632	50.6961	20.9588	9.88229	9.28709	2.5371	167.74	46.2009	24.809	19.2445	19.0467	13.2149	157.073	35.8194	16.3835	8.34199	9.57107	3.2047	89.6331	30.5531	29.505	9.71965	9.08049	2.89675	75.8328	24.1201	30.661	8.08131	6.62736	2.98963	72.2286	25.6088	30.4284	8.63067	7.85369
2	1	0	0.740741	0	1	0	0	0	27	2.29796e+06	1.80665e+06	-0.338752	-0.503639	1.31018	138.48	38.8839	63.4128	14.1358	9.38674	2.45445	121.788	31.0755	54.6799	25.3642	28.5098	19.1862	112.126	26.835	49.1842	12.453	9.66641	4.06543	82.3234	36.1074	75.1873	15.3798	10.1044	2.49425	65.5392	29.7822	69.1955	12.7462	9.16635	2.93156	54.2245	26.5326	52.4214	12.6878	7.73728
2	1	0	0.777778	0	1	0	0	0	27	4.93878e+06	4.28664e+06	2.28217	1.96976	1.25661	214.905	35.115	23.3688	9.59435	10.1503	5.4451	208.31	32.6845	25.3836	18.9648	20.8402	17.7405	173.355	25.8771	26.2761	15.2458	18.5677	10.8059	104.504	25.8545	28.9988	10.3297	11.4864	6.04038	101.226	21.3618	25.6825	9.63583	10.9046	7.04639	85.9516	17.7259	37.5658	17.4405	22.0521
2	1	0	0.814815	0	1	0	0	0	27	1.62901e+06	890024	-1.04726	-1.43466	1.31815	276.092	36.0144	25.1042	9.34498	6.37108	2.53755	272.941	32.8713	28.3473	16.4705	17.7722	14.6713	240.027	28.5223	19.7526	8.8493	7.32877	3.97434	133.14	28.3508	35.8181	10.4428	7.26485	2.96596	124.787	26.6959	31.3285	9.5511	6.12176	3.3571	122.039	23.1637	28.2473	9.02784	6.57711
2	1	0	0.851852	0	1	0	0	0	27	1.72639e+06	863396	-0.969683	-1.46834	1.30764	238.665	34.0321	37.3883	10.1095	8.58011	2.33348	211.787	27.5025	32.9275	20.0914	23.3886	16.6751	201.084	24.6975	30.4257	9.45709	8.89147	3.74631	91.021	31.2826	55.8178	12.3582	9.59332	2.3664	78.2887	25.4686	49.361	10.927	7.63103	2.53306	76.1744	24.0106	40.218	9.98226	7.62297
2	1	0	0.888889	0	1	0	0	0	27	4.26359e+06	3.96838e+06	1.54775	1.62942	1.31386	294.419	47.8748	26.3918	10.7805	10.8504	7.18858	274.604	43.8183	27.5379	19.7008	25.1752	24.3147	247.194	35.3321	26.3702	11.3101	22.9437	18.9503	84.4603	36.0097	36.1459	11.3369	12.695	7.61662	80.8136	30.6712	30.6218	10.1346	11.2112	8.96129	78.3593	26.8168	46.4499	13.2922	27.0233
2	1	0	0.925926	0	1	0	0	0	27	1.5212e+06	1.15054e+06	-1.21442	-1.19559	1.31612	246.766	42.2438	56.2152	12.9392	10.3854	3.7498	231.299	35.9035	57.2066	25.7011	29.7635	27.5082	219.768	30.3027	42.7638	14.9434	12.3842	7.0713	107.187	36.789	67.5852	12.5759	10.6753	3.51362	86.6639	31.0778	60.4896	11.8275	9.70115	4.27052	91.632	27.2939	48.5028	11.1602	8.97078
2	1	0	0.962963	0	1	0	0	0	27	5.46687e+06	5.1695e+06	2.71152	2.81595	1.34081	198.814	56.6962	52.2594	16.8524	21.7563	21.1962	187.518	48.8736	59.5632	19.7528	23.7165	27.3081	174.009	39.7941	66.4237	31.1345	60.8912	64.2445	84.332	34.2593	54.6114	17.6627	24.214	23.6517	73.0412	31.2636	62.1763	16.8174	21.2575	27.4064	74.187	28.5178	87.6495	34.82	71.1867
2	1	0	1	0	1	0	0	0	27	1.25782e+06	946000	-1.51737	-1.41447	1.31856	205.794	48.834	17.6177	7.62718	6.3544	2.50047	196.894	42.3181	22.5586	17.7271	23.1482	16.4194	168.523	36.5238	14.2883	7.33627	7.39225	4.18171	83.6068	34.809	23.8081	7.97488	7.30699	2.89251	77.2221	27.9345	30.0979	7.83327	6.54108	3.24379	67.6648	26.6026	20.093	7.38703	6.65854
2	1	1	0.037037	0	0	1	0	0	27	1.04945e+06	1.50559e+06	-0.804235	-0.216816	1.48119	270.232	40.3906	24.0008	8.51733	8.40919	4.57063	224.295	36.4452	31.0988	9.7069	10.0842	6.17032	223.181	31.943	18.5513	8.79093	11.4483	9.45555	105.1	24.3118	32.5735	9.8345	9.81296	5.53209	89.9015	23.3165	62.8064	11.1445	12.264	7.58591	88.0328	18.6705	48.4426	13.1316	19.2622
2	1	1	0.074074	0	0	1	0	0	27	2.32663e+06	2.05269e+06	0.446495	0.310685	1.38585	262.716	64.2232	38.0011	10.0571	7.01331	3.58677	218.953	53.9574	39.0801	10.0466	7.21757	4.16306	215.667	48.4354	31.1437	9.37122	9.65345	6.35689	88.2242	34.5091	46.953	11.206	8.13623	4.5654	79.3371	30.0801	48.8425	11.2397	7.15925	4.59988	82.2432	28.5209	49.1961	13.4592	13.9403
2	1	1	0.111111	0	0	1	0	0	27	1.26729e+06	1.82349e+06	-0.638843	0.059701	1.50115	251.73	42.9359	25.7229	6.58287	5.72474	2.90252	212.735	35.7742	26.3305	7.03654	6.24012	3.23304	215.711	35.2828	19.3269	6.23728	6.81727	4.95426	94.232	22.2012	33.0934	7.77306	6.59103	3.48077	89.3369	19.8	25.791	6.69019	6.02675	3.28472	80.9755	17.8721	37.8198	8.55179	10.069
2	1	1	0.148148	0	0	1	0	0	27	1.40303e+06	922714	-0.529562	-0.860615	1.40014	206.811	70.3696	44.5091	11.7633	7.65496	2.0751	175.264	53.5264	48.2257	14.134	8.30171	3.23813	187.268	49.2472	33.8135	8.771	7.34681	3.21827	90.1421	42.0192	48.0122	11.5441	9.0872	2.7768	80.3404	34.4865	58.2531	11.6624	7.91409	2.16678	82.3938	33.6503	56.4528	10.4634	9.92707
2	1	1	0.185185	0	0	1	0	0	27	4.77908e+06	3.89807e+06	2.82075	2.09161	1.64477	366.273	53.4875	25.7796	11.2433	9.98349	8.92405	304.188	48.9487	34.0607	14.6557	12.7613	12.0744	320.909	40.5641	18.9601	15.7715	16.2707	19.8436	120.383	28.8207	31.3331	13.6091	11.1288	10.7157	112.391	27.0179	37.1054	12.6024	10.6035	10.6551	106.981	23.142	28.7839	22.7412	18.3267
2	1	1	0.222222	0	0	1	0	0	27	1.42715e+06	1.08156e+06	-0.556843	-0.748423	1.92643	195.191	45.2884	25.0471	10.6691	9.65542	2.99242	183.009	41.7224	28.4208	13.3437	13.2245	6.23725	149.716	31.4574	17.2202	9.71688	9.53869	4.82113	80.2585	35.7348	35.0419	11.2875	11.141	3.60812	73.1744	29.8711	31.9791	9.87726	8.57636	3.25591	62.6675	24.8549	30.7013	10.8465	9.65883
2	1	1	0.259259	0	0	1	0	0	27	1.52371e+06	1.12724e+06	-0.486945	-0.721234	1.72439	229.586	45.5958	20.8865	7.72942	7.8178	2.55601	200.242	40.933	20.9485	11.805	10.8002	6.59603	192.661	33.0152	17.3752	6.69699	7.12728	3.02383	86.3404	32.3387	28.4163	8.45366	8.40703	3.12408	77.7322	27.2568	47.9671	8.20086	6.90502	2.97272	73.8515	23.3783	37.0845	7.17577	6.60315
2	1	1	0.296296	0	0	1	0	0	27	1.55513e+06	1.45115e+06	-0.482264	-0.41546	1.48901	195.436	42.8934	33.4862	9.24869	9.40352	2.78074	165.83	38.6542	37.7582	19.0406	27.7162	19.6952	159.534	30.8865	25.1789	10.4367	13.708	10.1243	91.9558	35.017	45.6355	10.8907	9.57119	3.02288	77.2856	30.5212	51.2941	10.7003	8.01013	3.75216	75.1949	25.4526	39.1215	8.86714	7.95482
2	1	1	0.333333	0	0	1	0	0	27	1.54432e+06	1.44797e+06	-0.518883	-0.441396	1.69731	299.587	33.4401	19.544	7.72027	5.14936	2.27962	253.566	28.3596	23.7527	16.111	17.7191	18.4041	259.81	27.3771	17.2727	8.15587	7.53827	5.80652	102.295	25.5446	23.9834	8.06304	6.38069	2.65162	88.427	19.643	18.822	7.01082	5.58952	3.1349	93.9254	19.4524	18.11	6.06696	4.62301
2	1	1	0.37037	0	0	1	0	0	27	2.33931e+06	2.24528e+06	0.253605	0.316401	3.5152	210.887	38.5988	24.3083	9.12936	6.55056	2.18877	189.962	34.0635	29.9538	17.8208	16.5508	14.012	174.118	27.9377	18.056	9.46633	8.32249	4.50945	85.6527	32.0338	34.1695	10.0022	7.65586	2.3542	76.0009	26.8588	35.9662	8.31047	6.00758	2.72862	71.9638	21.5212	29.2459	7.71138	5.99444
2	1	1	0.407407	0	0	1	0	0	27	2.92325e+06	1.93861e+06	0.80712	0.010244	1.48895	436.864	33.1724	37.8167	10.0061	8.1279	3.29161	408.685	29.3172	36.7675	19.6435	22.4315	16.4422	358.094	25.9014	26.5864	11.9922	11.9388	7.65736	138.202	25.8366	45.59	11.9843	9.2009	3.41922	133.552	20.1717	42.0626	11.6517	8.03013	3.80057	120.434	19.6318	31.8361	9.89785	8.97131
2	1	1	0.444444	0	0	1	0	0	27	1.10036e+06	1.18421e+06	-1.04192	-0.765182	1.53121	264.234	32.5985	27.8272	8.47545	6.50848	3.00925	220.109	30.8997	31.237	16.4409	19.4228	16.5965	229.943	24.7749	21.3755	7.93291	8.44513	5.29235	95.8662	24.2041	38.9659	9.3553	6.89136	3.06385	80.5657	19.4357	36.1492	8.43512	5.7036	3.17299	87.5756	18.1527	31.7372	8.02288	6.32215
2	1	1	0.481481	0	0	1	0	0	27	2.57246e+06	1.659e+06	0.407198	-0.327472	3.11431	164.146	43.7222	25.0933	8.37038	6.28556	2.21478	152.113	40.2255	28.8395	19.3687	20.5112	18.9482	143.244	29.5291	20.7142	8.65727	7.68579	4.2579	79.6007	33.1069	34.2342	9.08991	7.84654	2.41271	67.3725	29.4736	33.2967	8.01811	6.65251	2.58285	67.5905	22.518	32.4862	7.31675	6.26094
2	1	1	0.518519	0	0	1	0	0	27	2.75543e+06	1.88499e+06	0.560993	-0.107272	1.69403	136.167	32.6183	41.8668	11.9221	8.63991	2.36257	132.18	27.5144	45.4392	25.4706	26.3091	17.9347	121.446	25.4726	32.7893	10.4407	9.44786	4.03625	65.5135	26.6369	48.2361	12.3645	10.3281	2.84573	59.1726	21.8313	49.9728	12.0191	8.16346	3.17825	57.82	21.4066	45.009	9.6299	7.93605
2	1	1	0.555556	0	0	1	0	0	27	990679	2.03405e+06	-1.23004	0.021349	1.67919	143.609	39.626	18.7418	7.36057	5.52746	2.20895	119.835	39.0505	20.917	11.5798	9.71259	6.79651	127.583	32.1765	16.9154	6.73637	6.72056	3.52433	59.3706	28.1216	26.599	8.51935	6.4467	2.56358	52.5245	22.3891	20.6826	7.26535	5.10438	2.62361	53.9015	21.2419	27.559	7.26768	5.4375
2	1	1	0.592593	0	0	1	0	0	27	1.60463e+06	1.59551e+06	-0.64253	-0.436768	1.58233	225.212	39.4087	36.2055	9.65341	6.75259	2.43858	197.135	35.8927	38.5615	16.7248	15.4641	12.9817	185.021	30.7818	27.8318	8.85532	9.16333	4.44571	82.4971	22.5791	31.5489	10.4645	7.89997	2.77933	70.4727	18.5389	34.0993	9.69613	6.64121	2.89969	74.2759	20.052	37.5709	8.31062	6.47121
2	1	1	0.62963	0	0	1	0	0	27	1.65685e+06	1.69369e+06	-0.616952	-0.357146	1.38786	177.581	36.7863	33.6723	7.23489	7.51767	2.7615	156.604	28.9581	30.1304	19.8741	22.5878	19.6461	144.13	25.6904	24.8682	8.12619	9.43235	5.34126	81.7156	28.845	46.312	8.85308	7.95953	2.76263	70.9289	21.8621	47.1599	8.57813	7.02014	3.75408	62.8153	20.3395	35.9725	7.02792	5.93707
2	1	1	0.666667	0	0	1	0	0	27	1.67158e+06	1.54798e+06	-0.627869	-0.526519	1.68261	149.564	55.2542	39.8589	13.0076	7.67716	2.43637	144.942	49.811	43.5387	25.0268	22.4211	17.5473	123.785	35.8332	29.0797	12.5007	8.73123	4.45253	76.2381	35.5872	49.6167	15.3079	8.98859	2.58085	66.4149	28.5964	56.2788	14.7408	8.77262	3.98436	61.7585	25.5042	43.1922	12.5834	6.61163
2	1	1	0.703704	0	0	1	0	0	27	1.80007e+06	1.61639e+06	-0.520683	-0.503635	4.07755	201.222	56.7331	42.2792	12.9124	8.75423	2.78522	186.328	58.6297	47.3888	27.8001	32.0165	26.1303	168.71	36.1591	33.5662	11.2598	10.3457	5.70732	82.3603	40.0064	48.6804	13.1745	10.142	2.76886	73.5394	38.9179	51.7986	11.2068	9.24015	4.29515	69.2525	28.8993	42.8972	10.476	7.26768
2	1	1	0.740741	0	0	1	0	0	27	3.00777e+06	2.56603e+06	0.655832	0.4504	1.67874	274.268	34.8921	29.4029	13.147	8.98915	3.7568	222.25	34.2562	36.8908	29.4004	30.2858	27.8608	251.488	28.5509	24.1001	13.9921	12.2373	7.56172	90.3305	26.1928	38.0192	15.0933	9.4084	3.50448	72.8811	24.2995	39.5239	14.3888	8.33865	4.24683	91.3266	20.2003	35.2737	11.305	7.3596
2	1	1	0.777778	0	0	1	0	0	27	4.9133e+06	4.77152e+06	2.53502	2.63579	1.6321	359.561	44.4498	37.2518	16.8946	26.5719	24.5191	336.479	39.4171	44.2602	30.2557	40.1286	40.9635	302.456	45.1257	41.2795	35.5018	80.5768	92.619	135.461	32.3653	39.0269	17.5132	27.8162	24.6329	128.523	26.6482	39.006	19.679	27.8773	26.1502	120.277	38.9828	42.78	36.2644	83.6257
2	1	1	0.814815	0	0	1	0	0	27	2.26902e+06	1.69482e+06	-0.133664	-0.470825	2.52696	209.28	41.2766	33.271	6.47874	6.01514	3.03718	180.288	35.5468	34.2158	9.91845	8.98985	5.36572	177.765	34.273	22.064	6.24162	7.01777	4.58437	77.2051	29.2409	35.3606	7.43573	7.5842	3.82211	67.9128	24.211	33.3315	7.13091	6.47157	3.85409	64.4908	23.2806	29.3871	7.56489	8.1935
2	1	1	0.851852	0	0	1	0	0	27	1.58779e+06	1.60895e+06	-0.842225	-0.571783	1.99905	303.568	47.7377	29.5964	10.5172	5.25768	2.41057	274.909	49.8187	32.5058	11.8439	8.18512	4.25602	258.378	32.8871	24.4912	8.94854	5.94491	2.88823	104.771	29.8896	34.1345	12.6739	6.4946	3.0715	100.216	29.3688	31.6518	10.4186	5.64246	3.07682	93.2561	22.3091	35.6268	10.4719	5.84572
2	1	1	0.888889	0	0	1	0	0	27	1.30693e+06	1.40922e+06	-1.14983	-0.789579	1.75674	241.508	40.466	40.6712	14.2421	7.71978	2.55814	237.121	41.451	42.3327	17.4165	16.9953	10.6839	195.761	32.1487	36.5013	11.8661	8.68824	3.36491	89.6856	23.5914	51.3146	13.5972	8.56452	2.54471	80.8164	22.0767	47.883	10.9408	6.98708	2.73433	77.406	19.6991	53.1629	11.6182	7.20199
2	1	1	0.925926	0	0	1	0	0	27	3.90427e+06	2.97723e+06	1.42083	0.760032	1.54653	263.316	53.2474	28.3467	10.0926	7.28369	2.88895	225.35	44.4922	30.1438	19.1076	18.8916	15.9412	231.451	38.7408	22.5698	10.377	8.05053	3.7053	99.6906	36.9006	38.1581	10.7755	7.98559	3.26684	85.1663	32.1871	31.4661	9.56839	7.02532	3.77254	87.2968	29.0805	31.4969	10.4505	6.93538
2	1	1	0.962963	0	0	1	0	0	27	4.04248e+06	4.08418e+06	1.53299	1.84543	1.64024	337.847	45.8888	54.9009	17.7124	14.0896	12.1651	305.118	40.2684	52.6903	17.169	15.2046	14.294	303.192	38.2874	55.2895	35.27	28.5855	37.1701	109.196	32.0161	66.3239	20.1312	15.8483	13.3336	109.412	28.7456	71.7675	16.852	13.643	11.6665	104.008	24.9962	79.86	43.9039	35.3062
2	1	1	1	0	0	1	0	0	27	1.80754e+06	1.63014e+06	-0.727158	-0.634466	2.14534	247.891	34.8224	39.9056	8.79514	5.41237	1.82333	226.364	30.5938	43.6268	15.3725	12.8955	8.16866	202.477	25.8511	29.6928	8.05894	6.71526	3.5806	95.4357	27.9005	50.4313	10.0774	6.70723	2.27239	83.0109	22.5165	46.3186	8.56254	5.40292	2.25404	77.7559	19.5416	37.8472	8.48899	5.14171
2	1	2	0.037037	0	0	0	1	0	27	2.06334e+06	1.21957e+06	-0.382812	-0.996571	1.23579	224.042	44.361	35.4352	9.9074	8.24881	1.87485	179.054	36.6923	34.111	10.8611	8.69125	3.68587	205.366	35.5686	24.2887	8.36529	8.13016	2.88223	78.5541	29.9455	43.1837	9.29114	8.35052	2.24804	71.7046	23.1417	78.9716	9.84769	7.9417	2.05252	76.8207	23.4828	49.4548	7.92151	7.35906
2	1	2	0.074074	0	0	0	1	0	27	1.65198e+06	1.09477e+06	-0.781287	-1.11811	1.24453	208.39	58.323	37.7927	10.6561	7.23831	2.01465	191.45	50.5884	35.2391	16.7381	13.185	7.90101	177.819	44.3417	26.2116	9.59858	7.50788	3.21662	74.8772	38.8423	49.7716	10.2837	7.96306	2.60012	69.5603	32.0788	44.2758	9.74184	6.93391	2.70356	66.8645	31.924	37.6844	9.45004	6.44625
2	1	2	0.111111	0	0	0	1	0	27	2.18854e+06	2.18193e+06	-0.231809	-0.027825	1.26452	258.671	41.0066	36.3081	11.7639	6.46984	2.47076	235.786	38.8564	35.9306	17.3162	12.0568	8.73308	229.339	30.4823	27.4939	10.5003	7.28154	3.99689	101.732	33.5599	47.1173	13.2487	7.93661	2.99558	99.4352	29.5772	39.6201	10.2864	6.15724	2.95011	88.5524	23.0032	37.6009	10.5744	5.91668
2	1	2	0.148148	0	0	0	1	0	27	1.76328e+06	1.94153e+06	-0.644214	-0.264844	1.26117	274.164	39.561	26.0238	8.60979	6.36921	1.95602	247.552	37.23	31.5006	14.6767	14.7756	10.61	216.51	30.0041	19.0105	8.15934	8.13496	3.9249	101.942	28.488	33.6906	7.88139	6.38343	2.55757	100.039	27.115	30.2633	7.31251	5.55331	2.49589	87.5504	20.988	22.6177	7.69643	6.28879
2	1	2	0.185185	0	0	0	1	0	27	2.72591e+06	2.34105e+06	0.331335	0.13781	1.28157	233.604	47.5708	34.5823	10.8693	6.62222	2.30107	203.286	40.4596	34.6842	17.1503	14.0981	10.7615	193.771	36.4347	26.2222	10.0169	7.98881	4.56928	85.4133	29.7577	38.9154	10.8872	7.73707	2.71914	76.0001	24.7483	32.316	9.60581	6.13795	2.6526	71.1204	24.4016	32.4835	8.76134	6.98918
2	1	2	0.222222	0	0	0	1	0	27	1.64166e+06	1.00176e+06	-0.740107	-1.19781	1.24944	162.469	41.4405	40.0762	8.58455	7.53187	2.36851	155.344	34.2863	44.146	14.5301	13.4626	9.90314	137.405	31.3768	25.8191	6.86421	8.07589	3.4559	63.0811	32.1897	54.4224	8.79785	8.60621	2.45832	59.7853	23.7238	66.8234	9.0337	7.35068	2.51057	51.879	25.5533	48.8101	7.52983	6.66421
2	1	2	0.259259	0	0	0	1	0	27	1.29889e+06	1.29262e+06	-1.07003	-0.903506	1.23985	178.499	39.3601	37.7153	10.9298	8.22561	2.51838	153.176	31.447	43.435	20.9646	21.2616	16.3207	161.63	31.1621	27.8089	10.4909	10.9278	6.06593	81.0907	30.9925	53.4299	12.0227	8.71771	2.6688	64.3734	25.8896	43.8303	9.95652	7.4093	2.98937	65.7814	22.1192	37.0983	9.02817	6.72956
2	1	2	0.296296	0	0	0	1	0	27	1.72718e+06	1.36915e+06	-0.628671	-0.824657	1.33784	355.367	53.6361	48.7835	11.155	6.0343	2.24726	297.439	47.2307	53.6237	23.2826	23.005	21.145	291.349	38.0765	34.9734	10.8828	7.86952	5.38923	113.577	38.9254	59.8183	11.9599	7.19444	2.36037	97.9006	34.3934	59.6115	11.8231	6.83887	2.98022	101.199	29.8279	47.4627	10.0306	5.5921
2	1	2	0.333333	0	0	0	1	0	27	2.44874e+06	1.79544e+06	0.105646	-0.394429	1.28094	219.996	48.8546	41.7424	7.34898	6.14475	2.32664	214.658	38.9237	35.9687	15.5421	19.2753	15.5836	183.523	33.0721	27.3355	7.50511	7.91374	4.5548	75.6006	29.6819	48.8589	9.55511	6.91473	2.70226	76.0727	22.9587	57.1829	9.9659	5.91611	3.07986	60.3261	20.7592	39.796	6.7281	5.4707
2	1	2	0.37037	0	0	0	1	0	27	3.82168e+06	3.99265e+06	1.49143	1.80624	1.27014	280.958	45.8375	25.1526	12.4885	10.6739	9.03722	284.216	39.3222	32.965	21.8118	20.6549	19.4483	243.185	36.7789	28.3375	21.2477	24.5505	25.6236	112.795	30.7423	32.5382	14.0667	12.2669	10.0828	116.864	25.2066	31.225	15.6979	12.3964	10.8705	111.184	25.9562	41.0981	24.4269	25.1653
2	1	2	0.407407	0	0	0	1	0	27	4.05675e+06	4.31909e+06	1.73955	2.13513	1.35616	474.754	66.7023	63.93	23.7688	19.5796	20.63	505.888	61.1206	61.7441	28.2475	24.9186	25.5483	402.784	58.3679	68.4067	45.4378	41.4205	65.5266	164.877	32.7213	65.7434	26.1261	22.0476	23.5598	183.722	27.6887	57.6798	26.3357	24.1826	23.3212	162.655	34.777	80.4326	51.8209	45.6312
2	1	2	0.444444	0	0	0	1	0	27	5.37667e+06	5.23937e+06	3.07246	3.05817	1.41211	501.602	91.3656	53.8847	24.5183	19.7514	20.7158	462.832	81.9134	60.0823	23.1766	19.1678	19.1765	420.936	66.7018	58.8541	54.6487	58.2785	66.1868	151.08	38.8531	58.4734	27.1669	23.8126	24.0234	148.484	35.9359	63.1581	23.4721	20.3039	20.5528	141.8	37.7851	69.8711	69.5812	71.4825
2	1	2	0.481481	0	0	0	1	0	27	1.5893e+06	1.47237e+06	-0.702094	-0.705236	1.38748	266.536	58.0321	34.4605	9.6412	6.58952	2.00417	227.477	49.9238	40.8852	10.0153	6.62186	2.86349	245.882	46.3218	22.7501	7.77337	5.88843	2.37433	90.6135	34.5246	39.7261	10.7471	9.20166	2.68847	81.3941	29.8939	47.25	11.6781	6.89502	2.39937	86.12	27.4505	38.151	7.81702	6.76358
2	1	2	0.518519	0	0	0	1	0	27	3.80919e+06	3.85184e+06	1.53065	1.67768	1.37738	256.666	65.7133	32.7948	12.3316	13.797	20.918	229.537	60.4795	36.9331	15.0039	19.8465	28.3221	220.268	60.9359	34.8559	19.9417	24.9158	60.8657	141.549	35.2744	36.0476	13.3688	15.607	22.3554	105.639	31.1164	51.1992	14.7343	18.4745	29.4956	104.212	36.7202	52.5341	22.3358	27.0669
2	1	2	0.555556	0	0	0	1	0	27	1.4028e+06	1.94726e+06	-0.862942	-0.223163	1.34004	291.178	46.1035	18.9302	5.8133	5.60785	2.43005	259.37	38.5908	18.4084	6.43453	6.02925	3.3432	226.424	34.7737	14.4981	5.16022	5.41874	2.77164	107.665	23.6318	23.5168	7.51293	5.96985	3.11948	103.952	18.8027	21.9408	7.41729	5.31294	3.09284	84.9992	18.767	24.0494	6.42817	5.24578
2	1	2	0.592593	0	0	0	1	0	27	2.15938e+06	1.52781e+06	-0.093592	-0.638779	1.29222	220.97	58.3394	21.7496	4.04228	5.96146	1.89659	185.058	47.2929	21.6326	6.21364	6.89446	3.21122	184.836	44.7547	15.0435	3.25455	4.72947	2.02802	87.3855	30.3014	26.5755	4.94352	6.51023	2.47756	73.9227	24.5177	48.452	5.54599	6.5361	2.41149	69.4172	21.6388	34.1248	3.62452	4.44979
2	1	2	0.62963	0	0	0	1	0	27	4.6884e+06	7.07497e+06	2.44841	4.91113	1.3496	486.77	69.3317	40.2098	17.1499	12.3071	18.1389	448.095	62.3243	48.0301	15.5777	11.1915	13.4705	388.996	52.9847	34.4059	31.6839	28.3732	75.142	147.384	34.6535	37.8272	18.873	13.2439	19.8985	144.784	30.9666	45.9287	16.1944	11.6604	15.6746	130.048	29.1558	43.8377	46.8384	31.7193
2	1	2	0.666667	0	0	0	1	0	27	1.3651e+06	1.16859e+06	-0.862135	-0.99127	1.28838	192.315	45.2147	29.6305	9.04094	7.0465	2.69963	168.953	34.8891	33.5404	9.41046	6.95082	3.51883	157.932	35.8809	20.633	7.77163	5.60043	2.69472	79.2827	28.0164	36.5322	8.92227	8.49494	3.42495	70.9871	21.3815	53.0122	9.69174	7.79512	3.36477	70.4115	22.5068	40.8568	7.97831	6.29003
2	1	2	0.703704	0	0	0	1	0	27	1.51674e+06	1.56418e+06	-0.697523	-0.592874	1.33979	220.374	49.9273	19.9733	7.40139	5.12482	2.02331	203.182	41.8898	21.6538	8.13429	6.82788	4.24478	189.846	37.5101	16.2398	6.49282	4.75106	2.58564	79.9504	36.4647	25.7466	8.19222	6.07144	2.75883	77.4932	30.5983	21.29	6.9135	4.92736	2.53186	70.073	26.7154	24.2608	6.79181	3.96151
2	1	2	0.740741	0	0	0	1	0	27	1.79434e+06	1.77728e+06	-0.406968	-0.376847	1.37988	190.72	51.3329	19.1251	5.30655	5.87825	1.92438	174.075	42.722	18.3985	6.42836	7.02341	4.33229	156.739	41.3125	14.5624	4.5974	5.32733	2.58832	79.4968	24.9952	23.8624	6.72286	6.86357	2.61424	75.0051	18.9466	24.84	6.7554	6.6169	2.36998	60.7839	19.4586	37.7363	5.47415	5.50615
2	1	2	0.777778	0	0	0	1	0	27	1.4399e+06	969361	-0.748601	-1.18109	1.34821	264.236	50.8054	19.841	7.44108	5.44521	1.86287	231.835	38.6147	21.8919	10.3228	8.98116	6.34617	211.041	39.698	17.5228	7.27625	5.67471	2.93512	103.408	33.7435	26.1245	7.70635	6.84909	2.45738	92.8411	25.8105	26.931	6.57704	5.39165	2.20657	82.6212	26.8394	27.6745	6.93807	4.91535
2	1	2	0.814815	0	0	0	1	0	27	1.9867e+06	1.95174e+06	-0.188963	-0.195192	1.33109	197.374	44.1127	23.2134	7.7821	4.3678	1.71997	175.495	38.7036	24.5303	11.9856	8.74163	8.03742	171.046	34.2289	20.4131	7.25329	4.90852	3.0003	91.7149	28.7026	35.9403	8.36062	5.89033	2.31029	81.4382	23.8973	29.9618	7.50839	4.75806	2.0553	80.7308	20.5266	28.4079	6.64799	3.77563
2	1	2	0.851852	0	0	0	1	0	27	1.57162e+06	2.19704e+06	-0.591129	0.053188	1.35632	269.222	37.8448	18.2185	6.70731	6.27326	2.49401	235.13	33.2969	24.475	12.1007	11.637	7.68217	231.238	30.5106	13.32	6.08299	6.6156	3.63246	95.2071	24.8613	21.7403	7.17395	6.7472	3.04026	81.8626	20.4657	24.4991	7.95987	6.25647	3.05309	85.183	17.8494	21.9115	6.52172	5.32589
2	1	2	0.888889	0	0	0	1	0	27	2.53479e+06	1.81796e+06	0.384814	-0.322013	1.30501	244.476	37.2021	20.2458	5.43183	4.0452	1.33772	202.406	29.6653	18.5433	8.8634	7.87607	5.90791	217.801	28.232	17.3278	4.66738	4.35506	1.91673	92.1246	28.4096	29.6231	5.72124	5.35561	1.6447	78.4459	22.6933	22.1373	5.34353	3.98038	1.46218	80.184	20.6809	31.303	4.39569	4.08439
2	1	2	0.925926	0	0	0	1	0	27	1.70241e+06	1.31508e+06	-0.434828	-0.820893	1.24183	295.971	56.3081	22.1552	7.52627	5.66717	2.04562	256.358	48.4186	24.7503	12.2507	11.9105	8.5363	260.88	47.5372	18.1739	7.07052	5.89385	2.70845	106.093	33.6104	27.0258	8.71993	7.34985	2.44527	95.3858	27.129	24.3528	7.68625	5.65188	2.3443	96.3568	26.8044	24.7194	6.92137	5.31674
2	1	2	0.962963	0	0	0	1	0	27	1.78329e+06	1.36156e+06	-0.340905	-0.771951	1.32659	237.076	58.3083	35.1562	10.3178	5.15609	2.22345	201.017	53.852	42.2362	13.6244	11.5808	8.559	210.557	40.1255	25.0269	8.60969	5.54031	3.57693	87.3591	34.8707	36.1473	10.8635	6.23558	2.54154	78.807	31.3601	35.8284	8.88367	4.70424	2.45445	79.4481	25.904	31.2743	8.87117	4.56484
2	1	2	1	0	0	0	1	0	27	1.65933e+06	1.38009e+06	-0.451963	-0.750228	1.34042	272.714	62.6114	31.2941	9.85894	4.7833	1.8045	221.197	52.0223	36.0808	14.7015	8.66702	6.66016	238.777	46.0716	20.6647	8.41815	5.11828	2.43064	104.909	36.1244	31.1364	10.4662	6.6027	2.32503	86.5907	29.7168	36.1325	10.6167	5.19593	2.29133	90.7531	28.999	35.5323	8.75775	4.44885
4	0	0	0.037037	1	1	0	0	0	53	7.98448e+06	6.32831e+06	2.33675	3.1535	1.40724	55.7544	19.4273	6.17094	1.99234	1.5406	1.03849	55.1532	14.8711	4.57025	3.36184	3.29854	3.54918	65.6318	17.9785	5.59008	3.41962	3.24582	4.08646	32.3548	15.0309	6.1219	2.17968	2.0931	1.33554	28.7689	11.028	4.61047	2.01951	1.96952	1.51838	27.2947	10.4124	5.19156	2.26384	1.98884
4	0	0	0.074074	1	1	0	0	0	53	7.19114e+06	4.36296e+06	1.71283	1.25557	1.54577	46.1787	23.7321	5.04488	2.39747	1.89586	1.10192	43.4225	16.3777	4.35479	3.27987	3.86061	4.09496	58.3334	18.7943	5.3534	3.65759	3.58441	3.61887	33.164	18.3229	5.0438	2.35517	2.47776	1.21608	26.2501	13.0751	4.01576	2.01853	2.03625	1.36048	28.1797	13.7336	4.7085	2.73657	2.40197
4	0	0	0.111111	1	1	0	0	0	53	1.03805e+07	3.1923e+06	5.07117	0.1545	1.47473	51.3565	21.7456	6.76125	2.75304	1.7429	1.07286	55.1216	14.3214	5.34632	3.87614	4.367	4.62664	49.2203	16.778	5.95032	3.43294	3.17376	3.2078	34.6059	17.9526	6.618	2.86488	2.06868	1.20232	30.5268	11.8034	4.82606	2.42876	1.90348	1.2783	26.6715	12.6094	6.00201	3.3832	2.00176
4	0	0	0.148148	1	1	0	0	0	53	6.89938e+06	2.31541e+06	1.75921	-0.653589	1.47917	47.7627	19.6387	6.94413	2.37355	2.10646	0.98174	44.4218	15.5515	5.35238	3.96739	3.60531	4.2262	68.788	17.8755	6.62594	3.18699	3.33529	2.99033	32.3226	17.0941	7.57713	2.54361	2.7819	1.25298	25.4833	12.9892	6.41023	2.45015	2.14819	1.2907	29.8262	13.3161	7.90269	2.62499	2.34774
4	0	0	0.185185	1	1	0	0	0	53	5.70138e+06	3.02803e+06	0.730513	0.127075	1.5571	48.7821	16.9269	6.6953	2.57393	2.42217	1.03073	54.2125	14.118	5.55402	3.80222	4.43173	4.40045	49.5403	13.9667	6.2877	3.51852	3.47852	3.16972	33.7667	16.9737	7.4245	3.01466	2.99569	1.24352	31.8546	13.1284	7.03527	2.50778	2.47311	1.31939	26.7396	15.105	8.57923	3.18168	2.67901
4	0	0	0.222222	1	1	0	0	0	53	5.51434e+06	2.37928e+06	0.712646	-0.453018	1.57601	45.4725	18.5363	5.20027	2.52484	2.0924	1.39152	51.5249	13.9714	4.52181	4.76848	4.64118	5.30556	49.1665	14.3733	5.3916	3.25654	3.45114	3.72975	34.1146	16.3259	5.08707	2.80695	2.43187	1.55412	31.3297	11.4408	3.81231	2.75982	2.44124	1.87217	27.2337	12.1974	4.60649	3.08946	2.312
4	0	0	0.259259	1	1	0	0	0	53	4.51633e+06	3.35001e+06	-0.116603	0.588485	1.39114	39.6344	15.3686	7.1727	2.37323	1.72314	1.15042	46.8511	12.8648	5.31298	4.23997	4.03811	5.47219	40.6304	13.3047	5.83424	3.03354	2.911	3.0934	30.1649	13.1852	7.64853	2.40339	2.13501	1.39298	28.2664	10.2314	5.30261	2.50342	2.20727	2.10674	23.5673	10.9411	6.46376	2.64575	2.12491
4	0	0	0.296296	1	1	0	0	0	53	3.5946e+06	2.11306e+06	-0.86926	-0.579267	1.35852	42.2893	18.684	7.60939	3.33485	1.96377	1.06568	47.7091	15.6812	7.17613	5.86264	4.09876	5.25427	49.0494	15.3023	7.9992	3.74294	2.51819	2.83035	31.1119	15.5594	7.91336	3.65069	2.63412	1.25477	27.3359	12.5261	6.94103	3.9845	2.24375	2.13101	25.9312	13.1491	7.75613	3.58063	2.10512
4	0	0	0.333333	1	1	0	0	0	53	3.3871e+06	2.2692e+06	-0.907608	-0.354348	1.36518	56.3378	18.3593	5.39515	2.5798	1.94124	1.10214	61.3109	16.2065	4.47422	4.4367	3.55495	6.00632	71.266	15.0566	5.48605	3.37292	3.32401	3.35012	33.2269	15.8319	5.56097	2.85241	2.90211	1.35727	32.5488	12.1905	4.19062	2.81722	2.26721	2.43696	30.9293	11.0889	4.62241	3.57799	2.42254
4	0	0	0.37037	1	1	0	0	0	53	2.53583e+06	2.70281e+06	-1.58986	0.148722	1.3067	58.0988	19.6121	5.91774	2.76693	1.98299	1.10605	53.175	14.7221	5.3556	5.12756	3.86819	5.76084	65.2082	16.7788	5.76087	3.64121	3.26772	3.10096	43.8316	16.6939	6.9936	3.30726	2.37031	1.34729	34.3608	11.9789	5.49872	3.23398	2.34326	2.36172	36.6303	12.0879	7.23111	3.60207	2.205
4	0	0	0.407407	1	1	0	0	0	53	3.91591e+06	1.60253e+06	-0.040641	-0.882695	1.306	43.0232	15.5661	5.74145	2.10217	1.57726	1.2062	44.6628	12.9816	4.39774	4.43382	4.0121	5.88794	40.845	12.9911	5.58969	2.71349	2.89456	2.94756	30.5524	14.0677	5.3441	2.33915	1.96965	1.44629	28.3761	10.748	3.88911	2.90794	2.2012	2.67408	24.2672	10.5524	4.94862	2.76899	1.77593
4	0	0	0.444444	1	1	0	0	0	53	4.70828e+06	2.62602e+06	0.92093	0.209317	1.33801	39.3697	21.8406	6.43627	2.80044	1.66593	1.19028	48.3584	14.9788	5.02221	4.34306	3.42244	5.59614	47.2251	17.1062	6.224	3.66801	2.50319	2.93805	29.053	19.6851	6.77954	2.95905	1.984	1.45342	27.7089	13.1529	4.92337	3.00607	2.04272	2.49906	26.3838	15.2092	6.07732	3.6202	2.13379
4	0	0	0.481481	1	1	0	0	0	53	2.47979e+06	967862	-1.1383	-1.38055	1.39147	39.5427	21.0176	6.23333	2.5874	1.75869	1.20798	44.3563	16.2598	5.73303	5.13497	3.39308	6.0512	48.4729	16.9976	6.18815	3.63984	2.88134	2.82846	31.6773	17.7509	6.75587	3.0383	2.05718	1.54112	28.0397	12.4258	5.3874	3.09484	2.25185	2.82832	27.0707	13.8952	6.54452	3.89362	1.94408
4	0	0	0.518519	1	1	0	0	0	53	661206	1.18082e+06	-2.78762	-1.09942	1.45775	43.7814	16.7614	6.26621	2.70974	1.96956	1.35229	50.016	12.1879	5.09171	4.93632	3.69547	7.60005	53.9142	14.8903	6.47536	3.34805	3.27603	3.24926	33.067	14.621	6.61141	3.10918	2.07873	1.52468	30.2338	9.75995	4.78313	3.60474	2.30811	3.62443	28.5839	12.0334	6.44654	3.43665	2.21635
4	0	0	0.555556	1	1	0	0	0	53	1.19429e+06	2.48887e+06	-2.08545	0.277796	1.42726	50.3949	21.5986	6.73965	2.78384	1.9183	1.16044	54.3456	16.4466	5.63513	5.20887	4.41275	6.9107	62.4751	16.1267	6.64593	2.93845	2.21138	2.1385	33.8913	19.9039	6.7107	2.99992	2.40494	1.30358	32.196	14.0859	4.90991	3.30105	2.74695	3.91706	30.5094	13.6962	6.25898	3.5131	2.16055
4	0	0	0.592593	1	1	0	0	0	53	2.10316e+06	2.32544e+06	-1.00745	0.183197	1.42916	54.5091	15.0403	6.36462	2.54333	1.79046	1.26007	67.4219	12.8956	4.54872	4.99134	5.22192	8.08482	55.9534	12.8225	5.84781	2.89399	2.12113	2.08779	38.3643	13.8634	6.99537	2.71314	2.4526	1.44631	39.2218	9.78048	4.42243	3.43156	2.92839	4.2436	32.4641	11.3166	6.51663	3.16258	2.19329
4	0	0	0.62963	1	1	0	0	0	53	2.51581e+06	1.52688e+06	-0.425246	-0.548586	1.62889	42.0711	17.8305	5.21182	2.36026	1.98891	1.23758	49.6167	12.5894	4.04547	4.84011	6.95813	8.18384	43.969	15.5059	4.96896	2.79989	2.77535	2.26345	30.5457	15.3038	5.89196	2.39173	2.35783	1.42549	28.4516	10.8157	4.51068	3.08377	3.34001	5.09314	23.2963	12.231	5.57402	2.74544	2.21191
4	0	0	0.666667	1	1	0	0	0	53	2.73497e+06	1.81148e+06	-0.037184	-0.193943	1.51427	51.5669	14.4864	6.6815	2.85665	1.85183	1.32044	48.95	11.9418	5.32409	6.0241	6.01436	9.08009	67.4194	16.3023	7.31297	3.37784	2.83082	2.26934	39.2824	13.1016	7.73386	3.0938	2.17206	1.58772	30.4781	9.33939	5.51828	3.76155	3.53709	5.28712	36.3853	13.381	11.419	3.46415	2.03754
4	0	0	0.703704	1	1	0	0	0	53	2.26105e+06	1.50267e+06	-0.342117	-0.433119	1.43968	44.1468	21.4109	5.16262	2.34794	2.14845	1.19867	50.2399	14.5756	4.02799	5.14398	5.85967	7.83591	52.3802	16.0837	5.68622	3.02447	3.18055	2.35	30.2489	18.5602	5.04102	2.58451	2.78588	1.53457	29.4957	12.6513	3.6775	3.16786	3.89138	4.47645	26.3778	13.6532	4.78052	2.54813	2.45603
4	0	0	0.740741	1	1	0	0	0	53	949670	1.98057e+06	-1.48442	0.113953	1.40831	44.0526	20.676	5.7719	2.1822	1.84782	1.09368	50.7245	16.9517	4.74398	5.3892	5.78503	9.12186	47.9467	15.0815	5.60358	2.67421	2.46904	2.34657	31.1856	16.3912	5.52821	2.48488	2.28268	1.29539	30.5957	13.3261	4.31319	3.2402	3.58319	4.28326	26.9694	12.8971	5.20116	2.92071	2.11412
4	0	0	0.777778	1	1	0	0	0	53	1.62955e+06	2.95943e+06	-0.635481	1.16204	1.37277	45.1553	18.5469	6.89167	2.55853	2.0895	1.16854	46.9425	12.5948	5.30167	6.00541	6.8243	8.51373	60.3267	16.0874	6.1564	3.15132	2.82103	2.24421	31.9608	15.3883	7.49154	2.82387	2.32357	1.40938	27.9785	10.6615	5.37171	3.33737	3.60869	4.18965	29.9128	12.7403	6.82683	3.14162	2.26318
4	0	0	0.814815	1	1	0	0	0	53	3.05795e+06	1.68471e+06	0.96199	-0.043446	1.33571	53.6321	21.5032	5.46135	2.99175	2.04244	1.28729	57.1253	18.3879	5.13497	6.01572	6.09208	9.21432	63.4033	12.946	5.64672	3.58295	2.99982	2.34108	35.0091	17.9078	6.11485	3.10507	2.41661	1.48537	32.6854	14.479	4.94601	3.23026	3.53784	4.6774	31.9542	10.7182	5.96846	3.48637	2.27445
4	0	0	0.851852	1	1	0	0	0	53	1.75325e+06	852350	-0.173632	-0.806681	1.30993	61.5738	17.7159	7.006	2.54503	2.10423	1.25433	59.616	13.6526	5.5748	5.7268	6.46612	8.82471	68.5236	16.5407	6.23467	2.9962	2.83086	2.3737	38.3975	14.356	7.03698	3.09566	2.38207	1.34995	35.3445	10.4313	5.60879	3.35336	3.66847	4.72002	32.2143	11.4045	6.54881	3.50557	2.24211
4	0	0	0.888889	1	1	0	0	0	53	1.48361e+06	2.03903e+06	-0.273504	0.44569	1.61377	45.7844	16.1329	5.73243	2.2306	2.08878	1.23122	51.1429	12.8221	4.78105	5.795	7.17073	8.79441	48.1004	13.1076	5.57337	2.88246	2.46609	2.37699	32.4181	14.0609	6.30901	2.66277	2.50197	1.44913	29.7408	9.88006	4.93956	3.18653	3.25917	4.78873	25.686	9.45414	5.61446	3.03269	2.17607
4	0	0	0.925926	1	1	0	0	0	53	1.8877e+06	1.51941e+06	0.299029	-0.001554	1.27555	63.4537	17.5129	6.78907	2.45545	2.18302	1.23012	69.119	15.2779	5.61762	5.73659	8.80244	9.29481	58.3374	15.3279	5.84027	2.88173	2.69027	2.47651	44.3929	13.9359	7.78879	2.5183	2.86349	1.35095	41.1234	10.3906	5.89797	3.70131	3.96027	4.85046	34.7983	10.8303	7.09421	2.80724	2.38858
4	0	0	0.962963	1	1	0	0	0	53	2.02881e+06	1.21743e+06	0.609856	-0.237593	1.55523	37.2632	13.0353	5.66212	2.12907	2.24366	1.32464	29.7248	9.79009	4.12151	5.71275	7.58783	10.2195	50.5055	11.0915	4.85831	2.89218	3.28267	2.50198	30.2843	11.3045	6.10265	2.29434	2.78187	1.46753	21.7383	8.33272	4.35043	3.08266	4.11153	5.08692	28.608	8.86538	5.13432	2.42837	2.38262
4	0	0	1	1	1	0	0	0	53	2.08291e+06	1.39458e+06	0.832693	0.010433	1.36087	40.9934	21.1966	5.6239	2.36358	2.21171	1.34879	46.7192	16.577	4.79542	6.16106	8.44835	10.1594	45.9754	14.1085	5.61541	3.0515	3.24238	2.53306	30.6508	18.6256	5.85297	2.30816	2.52242	1.58026	28.065	13.9733	4.51504	3.28779	4.05795	5.15066	25.6464	13.139	5.99468	2.6276	2.252
4	0	1	0.037037	1	0	1	0	0	53	1.83175e+06	2.17005e+06	0.045657	0.722185	1.79538	52.9485	22.0883	6.53675	2.60007	1.86361	0.99083	64.1547	17.6202	5.98019	4.92218	4.93696	6.10738	55.1009	15.1389	5.85898	3.76572	2.60031	2.80498	32.3991	18.2162	7.30844	2.97039	2.27708	1.30157	34.3282	14.2098	5.98781	2.90184	2.19462	1.47701	27.6598	12.9113	6.46268	3.46523	2.62139
4	0	1	0.074074	1	0	1	0	0	53	1.52414e+06	1.37907e+06	-0.247808	-0.03897	1.59506	50.156	20.0747	6.25155	3.17279	1.96336	1.10764	53.4848	15.2438	5.56537	5.35216	5.36796	6.08022	52.466	15.8912	5.67103	4.16494	2.59871	2.72612	35.3527	18.1272	7.28016	3.53077	2.40058	1.35009	31.7552	13.4509	5.91675	3.00966	2.48418	1.63257	29.6532	12.9198	7.20471	4.13937	2.4306
4	0	1	0.111111	1	0	1	0	0	53	1.6666e+06	1.6552e+06	-0.090739	0.264603	1.62463	59.7333	16.2925	9.87133	3.4156	2.17031	1.25771	72.7502	12.9723	6.68188	5.8346	6.42648	7.06932	59.7941	15.3441	10.2787	4.51355	3.03274	3.03342	40.741	15.1829	10.3252	4.01898	2.68412	1.46284	41.5091	9.39143	6.94501	3.43611	2.80472	1.97523	33.1113	14.0744	10.3923	4.87551	2.85738
4	0	1	0.148148	1	0	1	0	0	53	1.47528e+06	858080	-0.267254	-0.50603	1.74486	46.4013	23.0266	7.19382	2.63387	2.17487	1.12079	52.0707	16.6596	5.70998	5.29089	6.02155	7.11777	49.8321	20.7839	8.47174	4.2755	3.23252	2.85388	29.2697	18.1014	7.37236	2.95093	2.78915	1.42282	26.2993	12.7683	5.29286	2.70082	2.65467	1.62972	25.07	14.9699	8.39015	3.80278	2.77151
4	0	1	0.185185	1	0	1	0	0	53	1.46949e+06	862841	-0.25921	-0.469869	1.39386	52.9992	22.9303	7.19254	2.85865	2.34981	1.2827	58.3648	16.4975	6.03147	4.96881	6.46682	7.07566	60.2573	18.7198	7.38352	4.08517	3.10732	3.38529	39.9221	19.6394	8.28938	3.79564	2.91804	1.47771	37.8014	14.184	6.64399	3.51385	2.66566	2.00978	31.8351	14.5297	8.92383	5.18937	2.88879
4	0	1	0.222222	1	0	1	0	0	53	2.30868e+06	1.09515e+06	0.596259	-0.218552	2.23258	42.1396	19.1912	5.84258	2.74788	2.16699	1.27641	48.0924	14.6429	4.96239	5.73163	6.37245	7.76325	50.9649	16.1201	5.64338	3.40193	3.3333	3.13759	30.5736	18.0263	6.47322	3.15031	3.06041	1.5289	28.5052	12.31	4.83101	2.83269	2.54237	1.87899	26.0794	13.4627	6.37917	3.9473	3.27803
4	0	1	0.259259	1	0	1	0	0	53	1.2739e+06	868947	-0.421361	-0.430158	3.4948	39.3877	18.6268	5.50753	2.44623	2.3608	1.18365	43.7736	12.785	5.01809	5.55147	5.66632	6.88236	49.4386	14.1337	5.37022	3.85036	3.17695	2.8626	28.3915	15.8594	6.08913	2.572	3.08796	1.47898	26.7429	10.7867	4.35798	2.34105	2.51826	1.67536	25.6949	12.0076	5.34259	3.40794	3.03122
4	0	1	0.296296	1	0	1	0	0	53	1.58808e+06	1.54937e+06	-0.095919	0.29463	1.89917	44.8796	16.9054	6.27806	2.13576	2.11504	1.15267	52.3378	13.4705	5.19773	5.04356	5.8879	6.12138	45.5327	13.9929	5.86251	2.90034	2.53192	2.63453	29.4324	13.6686	6.68644	2.37354	2.58546	1.44182	31.2888	10.0769	4.95954	2.18457	2.42089	1.68121	24.1153	10.947	6.35899	3.52773	2.51616
4	0	1	0.333333	1	0	1	0	0	53	1.86141e+06	1.02755e+06	0.193788	-0.208645	2.78174	40.8597	16.6779	5.04442	2.40423	1.79524	1.12549	43.549	12.7463	4.53915	5.04612	5.41136	6.46004	45.243	13.984	4.63514	2.949	2.44391	2.40915	30.5182	14.5929	5.46054	2.63129	2.23734	1.34374	25.7922	10.0012	4.06991	2.46643	2.2921	1.65082	24.7888	12.3778	4.72411	3.19574	2.72714
4	0	1	0.37037	1	0	1	0	0	53	1.69539e+06	814323	0.039474	-0.379752	1.40193	56.1731	22.0421	5.61159	2.70158	2.07362	1.28887	46.2842	14.6432	4.6144	5.33719	6.1576	6.559	68.9472	16.3168	4.74353	3.2846	2.75588	2.49711	40.2814	18.3503	6.03205	2.93314	2.77186	1.40004	30.1656	12.9383	4.77158	2.7652	2.36466	1.85904	34.1713	13.6327	5.65246	3.28682	2.90712
4	0	1	0.407407	1	0	1	0	0	53	1.63434e+06	797048	-0.00547	-0.377127	2.15495	38.1449	15.1937	4.85214	2.3488	2.18924	1.25141	47.7375	13.8469	4.72937	4.85175	7.52114	7.87792	38.7072	11.1983	4.2567	3.1789	3.37165	2.97989	26.4099	11.185	5.85013	2.49546	2.65095	1.38096	26.6742	9.57503	4.37223	2.62045	2.81318	1.93401	21.7029	8.1266	4.80433	3.18072	2.98358
4	0	1	0.444444	1	0	1	0	0	53	1.85098e+06	1.02264e+06	0.226571	-0.128084	2.56724	37.7109	18.4227	5.86715	2.27457	2.50342	1.15582	44.367	13.2392	5.47336	5.29565	6.61548	7.2895	42.1769	13.4566	5.65999	2.86433	3.41277	3.01753	25.6602	15.5967	6.54412	2.62421	3.03	1.37724	26.5485	10.7677	4.90329	2.57208	2.82339	1.7566	21.8362	11.163	6.46384	3.40908	3.23987
4	0	1	0.481481	1	0	1	0	0	53	1.47824e+06	1.20337e+06	-0.131309	0.078885	2.71191	48.8256	21.7418	5.59266	3.40176	2.25367	1.32032	48.0374	15.0962	5.32666	6.2025	7.08671	7.46649	55.4874	15.4731	5.59518	3.99161	3.48287	2.84366	35.2224	18.5288	6.52103	3.67172	3.13026	1.46018	30.6609	12.8546	4.92148	3.459	2.41957	1.90205	30.3235	12.2925	6.19589	4.85749	3.33881
4	0	1	0.518519	1	0	1	0	0	53	1.46091e+06	1.60838e+06	-0.13604	0.521506	1.76439	46.8631	22.5404	5.44544	2.96872	2.31749	1.37473	49.884	16.3059	4.77887	5.53239	7.02487	7.83896	57.0052	17.6928	6.04216	3.57319	3.79009	3.24718	30.6202	20.068	5.72527	3.32786	2.90795	1.58366	27.7259	13.898	4.49156	3.03327	2.83117	1.91735	25.8263	15.4495	6.10822	4.39765	3.23225
4	0	1	0.555556	1	0	1	0	0	53	1.59451e+06	978770	0.01148	-0.077191	1.45999	34.8406	21.857	4.75162	2.2475	2.12474	1.36387	36.5507	14.4575	3.98472	5.61256	7.67072	7.25888	42.6252	16.4604	4.13975	2.79172	3.76065	3.17459	26.207	17.1748	5.35636	2.52986	2.43708	1.45448	22.5909	12.0671	4.19569	2.55499	2.8819	2.07283	22.8338	13.6671	5.1671	2.79342	2.64219
4	0	1	0.592593	1	0	1	0	0	53	1.53228e+06	811117	-0.035976	-0.218168	1.56259	46.1455	22.7399	8.204	3.52612	2.90566	1.37261	51.2841	15.68	6.51117	6.19642	7.49731	7.10492	58.4798	16.5035	7.3207	3.67414	4.5998	3.52698	29.6544	20.2366	8.87695	3.76172	3.36487	1.39684	28.6334	14.3247	6.79953	3.56693	3.33388	1.84594	25.4974	13.9126	8.78002	4.85936	3.64604
4	0	1	0.62963	1	0	1	0	0	53	1.71859e+06	1.01282e+06	0.164881	0.011266	1.56357	49.7577	21.1988	6.88184	3.07218	2.70646	1.47579	64.4055	15.6069	6.19211	6.7636	8.51345	9.43427	56.9942	15.9917	6.19726	3.98477	4.91159	3.69318	31.1024	18.3921	7.8813	3.50252	3.0532	1.63962	33.1316	12.9435	6.13881	3.6007	3.42765	3.07673	27.4725	13.81	7.33546	5.18067	3.56723
4	0	1	0.666667	1	0	1	0	0	53	1.12413e+06	703342	-0.414002	-0.275605	2.05702	45.2002	14.7826	6.22407	3.30109	2.64686	1.45003	47.5256	10.8363	5.01542	6.58341	7.95699	8.42599	47.0497	12.206	5.69641	3.7801	4.06873	3.53347	34.9128	13.5636	6.86822	3.39939	4.32113	1.71124	32.2185	9.22897	6.12002	3.7765	3.23526	3.39896	27.6312	10.315	7.1691	4.90452	4.2021
4	0	1	0.703704	1	0	1	0	0	53	1.19798e+06	841974	-0.323721	-0.118727	2.96883	45.1436	17.5783	6.25286	3.44407	2.35913	1.61834	48.7189	13.2923	4.83953	7.23549	7.02734	8.87624	61.7954	17.5245	6.06944	4.21587	4.01564	3.58059	28.839	14.8754	7.57505	3.61944	3.16136	1.76118	25.3051	10.2241	5.30301	3.99408	3.37683	3.60399	28.997	12.2715	8.50085	4.88643	3.64145
4	0	1	0.740741	1	0	1	0	0	53	1.71506e+06	1.44241e+06	0.204967	0.52436	1.53711	44.0025	20.9385	8.68126	3.46807	2.39266	1.51674	38.8168	13.8138	6.27069	6.5532	8.26738	8.61889	57.629	17.1258	9.03815	4.56874	3.90699	3.81304	33.9235	18.9407	10.3058	3.68796	3.41991	1.72383	25.7254	11.9347	6.64039	4.32545	3.32685	3.49069	33.5098	14.099	10.1612	5.1703	3.98401
4	0	1	0.777778	1	0	1	0	0	53	2.06604e+06	1.19932e+06	0.572565	0.298605	2.5369	45.6856	20.5303	5.8747	2.3389	1.7504	1.48469	52.202	13.893	5.04338	5.88689	7.83559	8.70694	50.6779	15.9165	5.47358	3.7647	3.63589	3.60645	32.7389	18.7938	6.04463	2.48875	1.9583	1.60547	31.0864	12.9997	4.26802	3.11221	2.88834	3.54187	26.671	13.803	5.40259	3.61412	2.88115
4	0	1	0.814815	1	0	1	0	0	53	1.89004e+06	959344	0.41204	0.081695	2.98611	52.7878	19.5655	6.55397	3.27349	2.5266	1.34516	66.6209	15.7494	5.97231	6.11678	8.48614	8.27511	58.5153	14.8343	6.91164	4.34224	3.90084	3.4572	34.8913	17.7229	7.48435	3.62223	3.09365	1.40649	33.01	13.4941	5.96401	4.36902	3.13017	3.37155	29.0913	12.9478	9.93261	5.38474	3.5543
4	0	1	0.851852	1	0	1	0	0	53	1.82087e+06	782166	0.354799	-0.054457	1.71083	37.2814	17.6329	5.32075	2.71104	2.49804	1.55159	39.8444	13.308	4.82588	5.74861	8.81177	8.89418	45.9629	15.0734	5.27371	3.85017	4.40043	3.72961	28.3205	15.7424	5.5992	2.7819	3.16535	1.62298	25.4496	11.8459	4.41065	3.51624	3.2379	3.71916	23.5982	12.6858	5.25226	4.2878	3.40725
4	0	1	0.888889	1	0	1	0	0	53	1.3487e+06	523866	-0.102899	-0.284615	1.67268	36.1264	18.5429	6.0286	2.49007	2.75002	1.60552	41.384	12.0166	4.79699	5.87431	9.41659	9.14746	43.4649	14.1659	5.58035	3.2688	4.95557	4.11189	26.7828	17.1056	5.83476	2.45617	3.44699	1.70539	25.1534	11.7989	5.1083	3.25911	3.43529	3.71914	23.3736	12.6362	5.53478	4.34208	3.70033
4	0	1	0.925926	1	0	1	0	0	53	1.53977e+06	682228	0.102678	-0.098283	1.65095	49.3543	19.728	5.04427	2.23853	2.72226	1.40243	49.508	14.5006	5.32553	6.47814	11.1915	9.28018	62.3401	14.9725	4.36019	3.70919	4.76337	4.52993	29.9182	17.8389	5.75245	2.31842	3.56062	1.44242	27.3022	12.7253	4.39578	3.13317	4.16877	3.88485	29.3407	12.478	5.79135	4.20631	3.80287
4	0	1	0.962963	1	0	1	0	0	53	1.10468e+06	676065	-0.315628	-0.087955	2.73128	48.9357	19.732	7.81964	3.3031	3.01954	1.68749	47.4005	13.9148	6.67988	7.00404	10.9516	12.0678	67.3054	15.8386	5.61807	4.68839	5.02476	4.6594	32.7844	17.462	8.14759	3.37798	5.00192	1.78896	30.3453	11.9944	6.22034	4.16031	4.30484	4.87594	30.1994	12.2832	7.27564	5.22931	4.29781
4	0	1	1	1	0	1	0	0	53	876473	763781	-0.530741	0.034882	2.02298	38.4441	19.4881	5.57248	2.69543	2.55315	1.66181	43.3263	11.1098	4.82205	7.13423	11.5626	12.0446	50.9794	15.6652	5.1733	3.83111	4.90561	5.00318	27.0272	16.0039	6.7409	2.81903	4.1547	1.67207	25.5056	9.69007	4.68924	3.65632	3.99753	4.82489	24.8083	13.1678	7.64835	4.50155	4.56166
4	0	2	0.037037	1	0	0	1	0	53	1.51914e+06	736350	-0.020359	-0.262657	1.3554	57.3435	20.5115	6.11938	2.49519	1.73292	1.12032	57.535	13.2956	5.64869	5.15038	4.38297	6.57996	59.6545	15.7918	6.00734	3.28788	3.13411	3.22854	41.6924	17.2297	7.32218	2.74618	2.19489	1.43411	37.0876	12.0591	5.41147	2.98182	2.47058	3.23957	33.439	13.2602	5.95707	2.76259	2.49012
4	0	2	0.074074	1	0	0	1	0	53	1.6845e+06	1.20407e+06	0.159776	0.213634	1.34599	47.186	20.7538	8.563	3.12876	2.01653	0.9842	51.6737	18.1345	7.14108	5.48618	4.24068	6.54583	52.3865	16.2306	9.23569	4.12117	2.9462	3.11762	35.2861	16.9559	9.18323	3.95795	2.94387	1.39334	32.6255	13.7773	6.70442	4.13053	2.26299	2.89777	29.434	12.7603	10.1778	4.23869	2.75296
4	0	2	0.111111	1	0	0	1	0	53	1.28002e+06	854531	-0.230162	-0.126123	1.22064	38.3474	17.6253	6.17113	2.40091	1.87372	1.04642	32.38	12.5517	4.27533	4.91652	4.54645	6.77762	48.5322	12.8519	5.68299	3.65023	2.67894	3.3685	31.6629	16.1782	6.84245	2.67176	2.98799	1.36391	24.1964	11.1585	4.59419	3.09422	2.90827	3.33321	30.2991	11.3072	6.80896	3.15093	2.54174
4	0	2	0.148148	1	0	0	1	0	53	1.2282e+06	762657	-0.267165	-0.209669	1.23462	64.1695	25.0087	7.63876	2.91032	2.00565	1.01431	64.9067	18.4159	5.71977	5.59004	4.90774	6.87146	76.7138	20.0605	9.19219	4.24947	3.54687	3.08647	41.3044	19.6481	8.03648	3.38226	3.592	1.37154	35.0909	14.8363	5.57778	3.61169	2.63947	3.16607	35.9079	14.2116	9.76602	3.8636	2.84404
4	0	2	0.185185	1	0	0	1	0	53	1.92655e+06	821872	0.446172	-0.142927	1.32571	45.7914	21.5267	7.25055	2.79496	1.9332	1.03725	46.9866	14.1085	4.87586	5.23107	5.41488	7.06748	47.5052	15.7148	6.35123	4.37486	3.33316	3.88372	36.1527	20.0085	8.34332	3.23949	3.02243	1.28915	30.5852	13.3658	5.89697	3.45176	2.57391	2.99408	28.4251	14.5793	8.32975	3.76101	2.41289
4	0	2	0.222222	1	0	0	1	0	53	1.00417e+06	604320	-0.4614	-0.352091	1.33387	50.2031	20.7089	6.58433	2.76118	2.21915	1.07766	47.5231	12.0496	5.03502	5.84583	5.24326	6.56345	54.531	15.5703	6.04467	3.95353	3.20606	3.31395	39.059	20.369	7.58893	3.38746	3.45166	1.37397	30.0008	11.8169	4.97917	3.73471	2.69833	2.85348	32.0899	14.7868	7.09646	3.70332	2.69075
4	0	2	0.259259	1	0	0	1	0	53	918851	665576	-0.532237	-0.280768	1.18104	54.3032	18.814	6.30339	2.48664	2.01093	1.079	53.5409	15.3065	5.24242	5.56332	4.83958	7.13168	67.3589	15.2795	6.11854	4.2595	3.11578	3.68922	36.5478	16.5714	7.01782	2.82669	3.18042	1.45537	32.6941	12.7546	5.32072	3.10567	2.7725	3.2349	32.4084	12.6986	6.96045	3.66769	2.74146
4	0	2	0.296296	1	0	0	1	0	53	1.35402e+06	851455	-0.082261	-0.086501	1.18932	46.6832	16.6155	7.22434	2.16806	2.13203	1.16714	48.6343	11.3584	4.89655	4.87708	6.41186	8.28039	59.1224	14.7682	6.7712	3.89539	3.39273	3.62818	31.2702	15.202	7.17649	2.73711	3.15215	1.52575	29.9834	9.61291	4.48142	3.4128	2.57014	3.4007	27.3278	10.8825	6.50927	3.12792	2.68167
4	0	2	0.333333	1	0	0	1	0	53	1.6483e+06	783080	0.226879	-0.146688	1.21678	44.5533	21.3845	5.1999	2.78273	1.93558	1.18486	52.537	15.6382	4.96052	5.52758	4.55967	8.16502	51.8788	14.5546	4.93841	3.92102	3.14461	3.54888	31.4143	19.5126	6.01453	3.26019	3.04088	1.5278	30.1782	13.751	4.74536	3.24983	2.38586	3.0565	29.5388	13.5946	5.49477	3.75534	2.4638
4	0	2	0.37037	1	0	0	1	0	53	1.35212e+06	751973	-0.054528	-0.169218	1.20699	55.6493	21.1813	7.59625	2.95469	1.90117	1.16942	58.5511	17.3649	6.37424	6.63168	5.19226	7.65573	62.4899	20.4898	6.87349	3.87127	3.49845	3.20708	36.7401	16.5903	7.50804	2.98036	2.50767	1.46735	34.4766	12.0404	6.04354	3.60461	2.50726	3.23139	31.3439	13.275	6.24695	3.24617	2.43945
4	0	2	0.407407	1	0	0	1	0	53	850683	422875	-0.541046	-0.490482	1.26853	28.6343	14.3169	5.55963	2.15079	1.76909	1.16377	21.4729	9.23044	3.30552	4.51825	5.47209	7.00449	28.9328	11.7477	4.94594	3.03558	4.56712	4.15612	20.5575	14.6529	5.77621	2.50785	2.55522	1.43422	16.0424	8.53868	3.41005	2.61919	2.34941	3.35853	16.3953	9.91363	4.9004	2.70897	2.30134
4	0	2	0.444444	1	0	0	1	0	53	1.51199e+06	1.12138e+06	0.134939	0.217073	1.2129	68.1265	19.1517	6.4163	2.54441	1.90426	1.15855	56.6952	12.8933	4.88663	4.98361	3.97618	5.80318	89.8706	20.4015	6.01268	3.81186	2.88426	3.539	37.6489	15.4066	7.24134	2.80007	2.42275	1.35804	31.1237	9.61703	5.09766	3.57368	2.29662	3.04059	34.5883	11.5772	7.17046	3.39694	2.4362
4	0	2	0.481481	1	0	0	1	0	53	1.12561e+06	631982	-0.236779	-0.263196	1.15037	39.6569	20.6585	6.56751	2.53142	1.71437	1.15494	40.9736	13.1878	5.05014	4.86477	3.79846	5.89961	50.771	17.7122	5.87142	3.34015	2.93981	2.93835	31.0736	17.799	7.5924	2.68248	2.18128	1.35688	24.8383	11.3482	4.79629	3.05916	1.87126	3.11643	27.8823	14.7605	7.24004	3.1765	2.2582
4	0	2	0.518519	1	0	0	1	0	53	1.66017e+06	713089	0.312641	-0.173943	1.18193	46.8691	18.3128	5.85685	3.08765	1.97244	1.24069	41.9036	11.3816	4.30179	5.26639	3.86947	5.94565	53.013	15.19	6.4252	3.62512	2.91486	3.14753	36.4091	16.4026	6.77307	3.14537	2.31913	1.48035	28.4461	10.2665	4.24311	3.37066	2.18163	3.41778	30.9319	13.1121	7.50008	3.44331	2.42472
4	0	2	0.555556	1	0	0	1	0	53	1.12499e+06	901829	-0.207477	0.021951	1.30871	55.6275	19.5974	5.76354	2.54298	1.86435	1.14446	46.5126	12.9635	4.64722	4.87575	3.41896	5.50479	77.5467	18.9668	6.4752	4.04143	3.41786	3.45915	37.9514	15.6219	6.44055	2.98533	2.05887	1.4207	28.6054	11.272	4.31764	3.23347	2.00591	2.97147	38.7286	13.4242	6.63708	3.87582	1.95261
4	0	2	0.592593	1	0	0	1	0	53	1.55259e+06	1.05784e+06	0.237622	0.172753	2.62293	46.195	17.6511	5.66222	2.78076	2.07958	1.19197	50.9495	13.2787	4.51062	4.65641	4.14558	5.65407	50.1962	13.799	5.77492	4.0397	3.41904	3.26827	28.8993	15.713	6.64645	3.02043	2.66664	1.43076	27.7456	10.4087	4.62353	3.23358	2.43701	3.26598	23.2447	11.1973	7.97329	3.30667	2.42789
4	0	2	0.62963	1	0	0	1	0	53	1.57763e+06	1.03319e+06	0.274988	0.169054	1.42491	47.4474	17.8931	5.59538	2.80863	2.26588	1.30383	48.5824	13.6362	5.01632	4.88349	5.23222	6.12078	60.268	15.4977	4.77082	3.42239	3.74836	3.3925	32.1398	14.8152	6.15495	3.19716	3.10066	1.55287	29.0389	10.7292	5.41702	3.45342	2.83705	3.44734	28.767	12.7437	6.1462	3.79186	2.92765
4	0	2	0.666667	1	0	0	1	0	53	1.32277e+06	614011	0.035218	-0.243131	1.56669	39.9008	16.1345	6.51027	2.81797	2.13219	1.1629	39.5855	12.0532	5.24966	5.2452	4.76357	5.39107	56.9284	13.942	6.68422	3.56587	4.00407	3.56525	27.8765	14.4105	7.39184	3.3306	2.8455	1.43809	23.5432	9.5374	5.61489	3.52177	2.77772	3.09021	25.3477	11.1921	7.54572	3.84114	2.58045
4	0	2	0.703704	1	0	0	1	0	53	1.66358e+06	1.08556e+06	0.39087	0.236632	1.59181	61.9598	18.5567	7.20015	3.55983	2.54674	1.32044	72.1678	14.9203	5.12713	4.8037	5.5334	6.24923	60.053	14.4139	6.60081	4.32195	3.98324	3.58506	39.941	15.35	7.86245	4.35007	3.45534	1.50373	40.2864	11.8303	5.57652	4.36642	3.24772	3.34474	31.6657	11.3761	7.94152	4.85481	2.89327
4	0	2	0.740741	1	0	0	1	0	53	1.6902e+06	970918	0.431737	0.133232	1.326	45.2635	19.7876	6.62176	2.9056	2.76699	1.24913	46.845	15.0154	5.05065	4.63917	5.84379	6.03605	51.2234	15.2842	6.02774	3.85318	4.10898	3.38452	30.9594	16.7425	7.32289	3.34838	3.64247	1.5691	28.8767	12.0615	5.22126	3.4545	3.59785	3.42226	27.1267	11.5328	6.83203	4.03096	3.30212
4	0	2	0.777778	1	0	0	1	0	53	1.42843e+06	697659	0.184736	-0.131429	1.31423	47.2979	16.3129	5.14769	2.54363	2.081	1.46272	56.0505	13.5337	4.95976	5.23525	5.24863	6.97691	53.4077	14.211	5.69188	3.54735	3.65619	3.91621	34.4944	14.5796	5.75998	2.66054	2.41043	1.65385	35.0285	10.3019	4.40945	3.00839	2.79359	3.44667	29.2619	11.4758	5.85885	3.45137	2.35005
4	0	2	0.814815	1	0	0	1	0	53	1.20492e+06	884767	-0.023959	0.064086	1.32057	42.8357	21.0263	5.9298	2.55976	2.17323	1.35483	42.5605	15.7382	4.56123	6.23093	4.84001	7.99923	47.7931	15.6038	5.51723	3.3937	3.92111	3.54382	32.2976	17.5098	6.06242	2.79972	2.53122	1.6006	28.9704	13.6766	4.95702	3.46337	2.42279	3.68551	27.8748	13.1275	5.87292	3.14779	2.41239
4	0	2	0.851852	1	0	0	1	0	53	890330	912324	-0.322232	0.092408	2.06081	46.5608	20.7781	6.70467	2.75211	2.41622	1.48809	35.789	12.8473	4.65986	6.1669	5.45854	7.98985	71.2162	20.1596	6.85853	4.37223	4.68625	3.94673	32.0856	18.9817	6.73979	3.11257	3.98224	1.75783	23.6102	11.4554	4.9947	3.84027	2.83343	3.75723	31.6025	14.4962	7.60039	4.16145	3.29522
4	0	2	0.888889	1	0	0	1	0	53	919187	711550	-0.280391	-0.090747	1.1828	56.0669	24.6651	7.74388	3.33783	2.61968	1.40012	50.571	18.0204	6.50295	5.00671	7.96918	8.36833	61.564	17.0692	7.23486	4.12748	4.92112	4.14004	38.5807	19.3547	9.15853	3.81687	3.80217	1.54344	31.3426	14.3885	7.86884	4.06957	3.40499	3.22039	34.2522	13.4284	8.81201	5.1533	3.33393
4	0	2	0.925926	1	0	0	1	0	53	1.10106e+06	875492	-0.083709	0.081588	1.1907	42.5544	14.1939	7.92287	2.77862	2.59758	1.39448	43.1382	9.94872	6.64765	6.64984	6.8299	9.44644	52.9223	14.3199	6.3971	4.02151	4.36726	3.89627	28.5652	13.3138	8.35167	3.18182	3.85071	1.49489	24.8199	8.64301	6.32374	3.59378	3.65979	3.41435	25.1248	11.4277	7.30029	4.21672	3.91481
4	0	2	0.962963	1	0	0	1	0	53	1.07623e+06	1.22809e+06	-0.093692	0.442424	1.21373	36.9563	23.3454	10.1115	2.94237	2.50698	1.5763	37.5158	17.0126	7.65198	6.10093	8.42569	10.0233	44.9638	17.0026	7.24109	4.62361	3.28234	3.77248	27.4329	20.7397	11.0531	3.48085	2.99991	1.66819	25.0633	13.9182	7.64902	4.27157	2.98187	4.03639	24.7646	14.0205	8.63008	4.70932	3.1658
4	0	2	1	1	0	0	1	0	53	990353	750529	-0.164694	-0.02709	1.25441	40.7821	22.5608	6.18227	3.28983	2.64983	1.45408	46.2626	16.0028	5.53281	6.13723	8.01248	10.3525	56.2883	19.3201	6.18239	4.70795	3.64416	3.56211	27.3594	18.6317	7.17563	3.7387	4.33595	1.61551	25.3059	12.6906	5.12905	3.56363	3.14987	3.89995	25.512	15.6396	9.24242	5.90528	4.18524
4	1	0	0.037037	0	1	0	0	0	53	1.9608e+06	1.43209e+06	0.319806	-0.021946	1.19954	58.1879	16.6407	6.5277	3.18919	2.73899	1.25571	66.4437	15.5382	6.24364	7.12858	13.7044	9.58473	47.3361	14.7258	6.79219	8.11747	8.76952	8.97842	32.2868	12.3936	6.82032	3.73868	3.42439	1.69523	33.3379	9.49581	6.21631	4.03566	3.18364	2.68073	26.3832	10.6344	6.23633	4.64714	3.60524
4	1	0	0.074074	0	1	0	0	0	53	1.18408e+06	1.39163e+06	-0.444358	-0.037992	1.27163	55.5602	18.4945	8.15629	2.68422	2.53984	1.28659	65.2505	15.8594	7.61527	7.56504	12.9389	10.5872	45.2629	16.4893	8.95934	8.38946	9.25376	9.41228	31.3516	13.3808	8.44513	3.2165	4.12208	1.77674	31.8137	9.87065	8.23104	3.48086	3.49504	2.85261	26.07	11.8148	10.3134	3.88492	4.32702
4	1	0	0.111111	0	1	0	0	0	53	2.27177e+06	1.94481e+06	0.655668	0.540708	1.23744	50.7603	16.3543	6.07637	2.98365	3.02793	1.26305	53.3726	13.9485	5.85243	7.12924	18.0937	9.95626	47.2158	15.3528	7.10971	7.76889	10.254	9.72593	29.9152	12.3564	6.68235	3.72282	5.18866	1.78246	28.9271	8.40473	5.67658	3.99995	3.49823	2.57427	26.6505	10.86	7.45496	4.46437	4.58779
4	1	0	0.148148	0	1	0	0	0	53	1.75601e+06	1.13732e+06	0.152314	-0.241569	1.23267	49.4957	16.2603	6.71898	2.91377	3.20336	1.28811	45.3479	13.7877	6.6268	8.22017	18.3106	11.0582	49.1492	14.7234	6.16101	8.16048	11.0738	10.2124	26.6536	11.6054	7.77055	3.49511	6.13621	1.80495	22.6141	8.68869	8.25056	4.34759	3.9407	2.81031	23.5209	10.0126	8.20629	3.89106	4.84558
4	1	0	0.185185	0	1	0	0	0	53	1.55174e+06	1.52987e+06	-0.039666	0.176768	1.17273	48.1295	18.8214	7.86573	3.02913	3.09595	1.30112	50.453	14.7078	9.37511	7.76576	17.8408	10.2611	47.4717	16.7289	8.49385	7.46173	12.621	10.8185	28.8593	15.7942	9.44298	3.89708	5.86287	1.72557	26.6573	11.2929	10.0092	4.48098	3.95055	2.62907	24.7648	14.1588	10.5899	4.66668	5.08349
4	1	0	0.222222	0	1	0	0	0	53	1.17549e+06	1.48327e+06	-0.403241	0.153966	1.30407	37.6235	15.5171	9.18024	3.31551	3.67996	1.40631	41.1773	12.3763	7.43985	7.86296	20.0179	12.6518	39.5829	13.4118	9.0368	9.32257	12.0117	10.922	26.4449	12.6507	9.55112	4.0619	7.50571	1.81425	24.0379	9.4973	10.8488	4.9238	4.18904	2.888	23.8555	10.337	11.7649	4.90043	4.93835
4	1	0	0.259259	0	1	0	0	0	53	1.04624e+06	816089	-0.520247	-0.487212	1.22321	46.0369	17.6686	8.384	2.80992	3.31206	1.23434	39.9573	14.266	8.49116	6.551	16.8917	10.7419	49.9285	14.2431	7.70744	7.77704	11.2185	10.2675	30.561	12.803	8.25476	3.36089	6.93974	1.5328	23.4365	10.5923	9.36927	3.93245	3.50156	2.82754	28.2373	10.9252	8.65343	4.24926	5.44886
4	1	0	0.296296	0	1	0	0	0	53	1.58957e+06	1.51121e+06	0.035627	0.232417	1.28644	52.072	15.048	6.75545	2.65541	3.54016	1.40989	41.6773	12.1324	6.09441	7.56584	22.2375	10.9606	54.9673	13.399	6.75617	8.27705	12.1906	10.4682	32.1452	12.356	8.19682	2.9067	6.89004	1.53252	25.7455	8.7218	6.61455	3.57871	3.87408	3.09876	29.6493	10.5317	8.96748	3.43458	4.2425
4	1	0	0.333333	0	1	0	0	0	53	2.30011e+06	1.56966e+06	0.758272	0.317589	1.13671	41.8441	18.2698	6.54699	2.55756	2.84777	1.27957	42.4619	13.0785	5.70122	7.68043	20.9368	11.9273	37.009	14.9745	7.27367	7.68759	10.6165	8.154	26.9863	15.2338	7.45063	2.9296	5.68864	1.72283	24.942	10.3965	8.80026	3.8276	3.87161	3.11319	21.8545	12.1718	10.5621	3.50087	4.61978
4	1	0	0.37037	0	1	0	0	0	53	818754	1.28519e+06	-0.710633	0.058058	1.15777	41.0647	14.8014	6.39729	2.86507	3.61883	1.31727	43.6051	12.1739	6.1423	8.07497	22.8162	12.3518	33.3761	12.2372	6.94314	8.156	13.2739	8.80967	32.8324	13.5699	8.62791	3.44281	7.23523	1.66231	29.2538	9.93854	7.80612	3.95237	4.25626	3.11827	25.4858	11.506	10.8135	4.19388	5.11152
4	1	0	0.407407	0	1	0	0	0	53	1.29435e+06	827881	-0.222476	-0.374859	1.23205	40.0725	15.6533	6.57155	3.42717	3.72526	1.41348	35.474	13.9041	6.5939	8.58092	29.9807	14.5494	42.6031	13.9583	6.26113	7.55581	13.7689	11.3379	25.5661	11.0899	7.33601	3.89717	5.61836	1.60812	21.3416	8.5055	6.21841	4.14581	4.32571	3.2263	24.8093	9.90205	8.04291	4.2057	4.86269
4	1	0	0.444444	0	1	0	0	0	53	1.52415e+06	1.0742e+06	0.019606	-0.102733	1.1701	38.9546	16.3588	11.5588	3.89644	4.28938	1.64845	39.4257	13.3451	9.26181	8.54666	27.1282	14.3806	35.3292	13.6417	9.97209	8.72096	14.3117	11.2918	27.3429	14.2127	13.5929	4.82911	9.01457	1.71076	23.6066	9.53856	15.8345	5.95452	4.54414	3.13964	22.0247	12.9358	20.1983	5.85697	5.05663
4	1	0	0.481481	0	1	0	0	0	53	1.49059e+06	1.53249e+06	-0.001511	0.380595	1.18261	43.8778	17.2252	6.3363	3.21847	4.10475	1.47908	44.938	13.3339	6.07213	10.2576	22.9797	12.3712	44.0222	14.7629	5.74651	7.2679	11.3745	10.1151	26.9331	12.4238	7.33261	3.48014	8.54487	1.79372	25.6962	8.90891	7.55992	4.18928	4.60243	2.96023	24.106	10.6304	8.27343	4.45546	5.9785
4	1	0	0.518519	0	1	0	0	0	53	1.80286e+06	880277	0.323143	-0.246335	1.17079	48.4526	15.2715	9.88536	3.83664	3.67941	1.5354	49.5209	12.5754	10.3521	9.8179	23.5685	13.4373	46.5729	13.852	8.48952	9.61589	11.5699	10.4431	33.7451	14.5279	11.4226	3.85831	5.93342	1.69517	32.1002	9.80454	12.9407	4.59931	4.11264	2.7909	27.9775	12.4012	10.9271	5.29793	4.79506
4	1	0	0.555556	0	1	0	0	0	53	1.17658e+06	651028	-0.290799	-0.45006	1.13613	31.5035	15.1439	7.9186	3.97264	4.48883	1.67962	27.6703	11.5189	8.6696	8.85443	25.8418	14.8126	32.8406	12.3586	7.33962	8.53585	13.3779	10.0115	25.5723	12.8718	10.6379	4.93574	7.96045	1.74899	19.4227	8.76234	14.2716	5.4159	4.49749	3.10063	22.6272	12.4355	11.4771	5.31413	5.72692
4	1	0	0.592593	0	1	0	0	0	53	695911	718878	-0.759001	-0.357321	1.16247	41.0426	15.9471	7.98088	3.68803	3.97851	1.68744	35.3333	11.4706	8.07655	11.4134	19.9089	13.084	40.257	15.2737	8.45117	9.3404	11.9661	9.6516	28.9528	13.9475	10.4928	4.74135	7.17944	1.81967	22.8736	9.19066	11.6303	5.00577	4.46344	3.0177	22.3251	13.5206	14.3182	5.36551	5.67327
4	1	0	0.62963	0	1	0	0	0	53	901822	908412	-0.540761	-0.142209	1.12271	48.8312	18.4183	7.48788	3.29435	3.90351	1.75166	44.5934	15.6278	8.36092	9.77857	26.4926	15.2029	47.6092	15.8162	7.50201	8.28861	12.6689	9.91899	33.3502	14.9395	8.88783	3.90525	6.05044	1.90575	27.4102	10.2471	10.9375	4.18449	4.45745	3.30908	30.8721	12.3158	9.59081	4.60201	5.2557
4	1	0	0.666667	0	1	0	0	0	53	1.00858e+06	901151	-0.421609	-0.124197	1.11215	61.8705	18.7512	9.30093	3.99927	4.85828	1.99241	70.5389	17.4764	9.42991	10.8083	27.5961	15.7856	56.3296	17.16	9.60777	9.01031	14.4892	10.3627	35.8967	15.1994	11.2252	4.99051	9.11848	1.99763	34.7613	11.905	14.6903	5.98667	5.68507	4.5902	30.3106	15.7891	16.2462	5.87544	6.34747
4	1	0	0.703704	0	1	0	0	0	53	890765	524284	-0.527049	-0.475744	1.09709	45.4363	19.4172	12.3101	4.06524	4.22265	1.99382	44.6288	15.2173	12.6821	11.8007	30.4832	19.5526	48.0485	17.2709	10.4958	10.0963	15.5596	12.3086	29.3816	16.5203	15.2874	5.12401	8.61092	2.16729	27.3711	11.7974	21.6349	7.54616	6.53063	7.36123	26.2216	13.385	19.8018	6.81533	6.405
4	1	0	0.740741	0	1	0	0	0	53	1.34402e+06	809188	-0.06133	-0.165947	1.12306	40.9732	14.9916	8.92855	3.7687	4.00775	2.08106	38.3728	11.8315	9.06545	11.9906	32.1977	22.2189	46.7836	12.2606	8.78038	8.5188	15.9695	11.7975	26.8379	12.5408	10.9281	4.20128	7.53826	2.37656	20.9358	9.72354	12.7305	6.33343	6.22195	8.76371	25.1545	10.2345	16.3615	5.41271	6.93554
4	1	0	0.777778	0	1	0	0	0	53	2.04795e+06	1.16445e+06	0.655162	0.213733	1.19481	44.7983	14.542	6.35928	3.10813	3.28658	1.90037	40.1921	12.6993	6.05968	13.3228	24.9407	21.3427	40.8105	10.4633	6.54273	8.3934	14.5441	12.9825	32.8173	13.4257	8.65048	3.21994	5.13352	2.01721	26.4854	9.85607	7.29208	5.28154	5.92321	8.87944	27.6548	10.3697	10.957	4.70318	5.40276
4	1	0	0.814815	0	1	0	0	0	53	2.44163e+06	1.30557e+06	1.08014	0.284588	10.3564	48.5758	18.132	11.8964	4.16643	4.44732	1.94507	43.188	13.529	11.8288	12.8749	30.9105	21.3674	56.9371	17.5346	11.2126	9.85518	14.8499	12.0759	26.2853	16.5591	15.676	5.00864	7.06361	2.10699	22.1644	10.3717	14.8139	6.26327	6.34446	9.12083	26.3415	14.8659	21.1001	6.14113	6.55978
4	1	0	0.851852	0	1	0	0	0	53	1.49687e+06	1.08714e+06	0.163601	0.011468	18.0237	54.4001	17.4339	9.16293	3.5389	4.20555	1.96725	47.3286	14.5563	9.55256	13.7395	27.9825	20.9641	60.7608	15.6521	8.8528	8.95157	15.4939	14.5794	31.1518	15.5052	10.2029	3.88073	6.1543	2.09224	25.7217	12.9833	11.0392	6.01096	6.37653	8.36936	30.0213	16.0914	15.5719	6.19393	6.60622
4	1	0	0.888889	0	1	0	0	0	53	1.28236e+06	1.28008e+06	-0.058638	0.33128	8.25793	50.0174	15.8355	7.34013	3.72345	4.03048	2.12538	45.6575	12.9939	8.55969	11.8186	32.4695	23.175	53.8692	12.2817	7.82493	8.95616	19.2427	14.1107	32.2585	12.8747	9.61567	4.46792	7.48736	2.26926	26.4138	10.2011	14.3051	6.1848	8.53229	8.92939	28.1327	10.143	13.8137	6.32717	6.89919
4	1	0	0.925926	0	1	0	0	0	53	1.17307e+06	943281	-0.153467	0.009327	9.24889	51.951	16.851	12.5002	4.0148	4.3236	2.04673	45.8361	13.4612	12.0842	12.7248	34.2185	23.8061	57.0494	15.2514	11.894	9.77018	18.3004	13.6886	30.7577	16.3918	15.3112	5.06414	7.02242	2.19926	25.4379	11.5511	17.4735	5.82836	7.30864	8.60934	28.8545	15.9671	25.9959	6.24648	5.87128
4	1	0	0.962963	0	1	0	0	0	53	1.15032e+06	562409	-0.165068	-0.340004	8.63656	62.1933	19.6753	10.0314	4.18356	4.53258	2.21954	55.6326	14.5401	11.3825	12.2386	34.0437	26.9594	66.8338	17.5495	9.5616	10.3824	19.1532	15.4294	36.2482	14.7884	12.6379	4.84056	8.66888	2.26878	31.9841	10.5223	16.974	8.00931	7.94595	9.62733	32.5968	14.182	18.1683	7.34361	6.43411
4	1	0	1	0	1	0	0	0	53	1.54287e+06	949020	0.248413	0.0287	12.7717	47.2533	18.4098	11.2911	3.7813	5.30363	2.12346	39.4996	13.7298	11.4385	11.2446	40.9361	25.9957	57.6816	15.4426	11.092	10.5757	16.84	13.0185	25.8024	16.5837	13.3877	4.98211	8.83991	2.16786	20.0364	10.9645	18.3114	7.80126	7.54996	9.77088	24.3424	14.3793	17.6559	6.05181	6.43901
4	1	1	0.037037	0	0	1	0	0	53	1.04881e+06	918654	-0.29668	-0.098835	1.5414	58.3316	16.2123	6.20162	3.17352	2.65101	1.33919	57.0865	14.2198	7.08961	9.86631	13.4901	11.2593	54.5254	14.4252	6.91872	7.44445	8.0439	8.62374	30.8361	14.1491	7.20766	3.32178	4.06837	1.66441	26.8652	10.205	6.00974	3.51777	3.29953	2.03018	27.6457	10.959	7.11657	3.97568	4.19519
4	1	1	0.074074	0	0	1	0	0	53	1.46163e+06	956442	0.111975	-0.063056	1.56499	62.6689	18.0859	10.0319	3.50014	3.24182	1.55958	61.175	14.3058	8.54124	10.0063	17.6655	13.0676	56.8701	15.4912	10.091	7.8565	8.5305	7.66548	33.8044	12.5582	10.4868	4.24098	6.50561	1.89337	30.9365	8.95524	9.57608	4.00612	3.89831	2.42026	29.3153	10.451	11.1525	5.44865	5.0652
4	1	1	0.111111	0	0	1	0	0	53	1.3803e+06	1.06839e+06	0.026491	0.046821	1.59461	66.539	16.1813	7.48054	3.01416	3.92001	1.31065	58.9429	12.8752	7.45254	9.56944	26.1319	11.7943	64.4994	13.3893	6.0198	6.78374	9.6759	7.96701	33.2763	13.7831	8.44742	3.33911	7.63503	1.61379	31.3648	9.31512	7.88028	3.50773	4.20933	2.07089	30.5001	10.8779	7.99558	4.26777	5.21012
4	1	1	0.148148	0	0	1	0	0	53	1.18219e+06	886613	-0.175621	-0.137758	1.69392	64.2875	19.5865	12.7708	4.16658	3.64378	1.35904	54.3301	14.2372	10.7696	9.63832	25.4276	13.7494	74.7757	16.4879	11.6615	8.64688	9.0102	7.93997	34.1797	15.6074	14.6606	5.01154	7.73224	1.59973	28.3428	10.8292	17.9548	5.76665	3.5052	2.12744	33.9024	12.9318	20.7824	5.34833	4.88645
4	1	1	0.185185	0	0	1	0	0	53	943807	537792	-0.418247	-0.488181	1.67835	63.187	17.6006	12.444	4.59259	4.36887	1.47746	55.2296	14.0091	11.587	11.041	35.5679	18.5039	73.263	15.2725	10.5381	8.58732	12.2605	8.17503	34.8945	17.5881	14.7825	5.96241	8.15477	1.57007	30.2352	12.8082	18.7213	5.91529	4.192	2.25967	32.228	14.4837	21.7905	6.74587	4.97455
4	1	1	0.222222	0	0	1	0	0	53	1.3181e+06	818772	-0.047675	-0.211444	1.91625	97.1728	18.7994	11.7692	4.67629	4.50836	1.53534	73.0461	15.9148	10.6451	12.1885	41.1937	22.8743	127.773	16.5815	10.2433	9.5712	14.2882	10.6977	43.4834	17.2951	17.1586	6.43947	7.42423	1.77429	35.5422	12.3952	18.7448	4.91731	4.65866	2.41896	47.9308	14.1961	21.2357	6.49283	5.31783
4	1	1	0.259259	0	0	1	0	0	53	1.22115e+06	574889	-0.145141	-0.475738	3.70652	62.3055	17.7726	9.19185	3.77169	4.00851	1.44412	49.4577	13.559	8.74537	13.4885	29.4659	20.0311	75.0355	14.7277	9.30278	8.67505	11.3354	9.03056	32.7576	16.1595	13.1117	4.6319	7.33668	1.69841	25.4663	10.7858	15.5131	5.11787	4.23261	2.2645	32.4607	15.3206	19.5618	5.9919	5.31359
4	1	1	0.296296	0	0	1	0	0	53	1.64945e+06	898932	0.27413	-0.12915	1.37256	58.8161	12.7415	9.69501	3.92557	4.94278	1.65879	53.3162	11.9135	8.95437	12.5592	42.964	24.13	66.9532	11.2832	8.54652	8.37032	12.4534	10.3948	32.1526	10.7458	11.6043	5.17018	8.85487	1.86803	27.2212	7.64771	11.513	4.87096	4.87233	2.73636	29.3896	9.5437	15.3457	5.34497	6.00739
4	1	1	0.333333	0	0	1	0	0	53	1.39053e+06	440605	0.012095	-0.594787	1.90493	56.5177	15.1715	10.5558	3.32519	3.69416	1.6017	43.3885	11.3202	8.81705	12.5486	40.9904	23.7114	71.9011	13.526	10.8143	7.55959	12.9557	10.7628	27.8786	12.9082	11.6351	4.71084	6.1385	1.80011	23.4562	8.52006	12.7018	4.31866	4.84531	2.54319	29.0476	11.1545	13.5377	5.14085	5.09008
4	1	1	0.37037	0	0	1	0	0	53	1.62995e+06	1.2125e+06	0.246411	0.17986	1.47169	57.7784	16.0974	7.02124	3.66919	4.89782	1.69456	55.4823	13.7658	7.10075	14.2847	47.9348	26.5025	60.507	13.6685	6.88908	9.01484	13.1491	9.44403	34.7778	14.1752	8.85429	4.55692	7.74951	1.89391	31.105	10.649	8.64729	4.61422	4.67322	2.64853	31.0013	11.672	11.4349	5.35601	6.03641
4	1	1	0.407407	0	0	1	0	0	53	1.24027e+06	1.46898e+06	-0.147631	0.435348	1.39719	97.1926	14.7992	13.3532	4.304	4.41398	1.87346	68.6538	11.895	11.4898	14.6933	47.8365	27.8283	125.115	13.4852	13.7523	9.24685	15.3453	13.11	40.6203	12.5027	14.9359	5.20222	7.74112	2.08906	30.2589	9.64855	17.0351	5.37514	5.01457	2.73734	44.7721	11.062	24.881	6.20434	5.62
4	1	1	0.444444	0	0	1	0	0	53	1.58224e+06	1.26335e+06	0.190088	0.228181	1.37542	127.205	16.475	11.6325	3.61922	4.84856	1.84211	91.6726	14.8557	11.4142	16.0509	53.1949	33.7301	173.864	14.9325	9.77446	8.66943	15.6017	11.7541	55.3812	15.3981	17.122	5.38271	8.14973	2.01546	43.2125	11.167	17.0635	5.3661	5.28003	3.17531	61.3145	13.1421	19.6674	5.51611	5.88619
4	1	1	0.481481	0	0	1	0	0	53	866256	612925	-0.526364	-0.442937	3.19254	50.638	18.558	7.496	3.45911	3.21723	1.73684	41.1457	16.6759	8.21116	15.2827	31.6866	21.4225	56.6141	14.1311	8.01235	8.73943	10.2693	8.81437	32.5068	15.1735	9.33605	3.74362	4.49274	2.03508	24.2024	11.2751	9.37184	4.19165	3.97129	2.71653	31.3076	11.5391	10.509	4.52225	4.33944
4	1	1	0.518519	0	0	1	0	0	53	800014	421812	-0.600049	-0.619492	1.62546	58.5845	15.9219	6.15306	2.52113	3.69748	1.9366	44.1814	11.4462	6.45692	14.5085	33.7756	23.9974	64.8841	14.512	6.45417	7.57295	11.4327	8.57973	33.7452	13.7394	7.70583	2.97876	5.6983	2.144	25.4301	8.93468	6.63789	3.45898	3.85266	2.72423	32.2137	13.0781	9.50646	3.81949	4.69762
4	1	1	0.555556	0	0	1	0	0	53	1.3512e+06	995038	-0.052033	-0.053267	2.12822	58.5046	15.1104	8.33558	2.94681	4.39962	1.97395	50.0788	12.4002	8.07156	16.5239	30.9329	23.1556	64.5439	13.1064	8.89737	6.71558	13.1385	9.12284	32.3276	11.3688	9.57773	3.75937	8.14621	2.12669	27.6364	9.1539	7.19022	3.98605	4.84286	2.67371	30.701	9.63414	11.6543	4.67786	6.15947
4	1	1	0.592593	0	0	1	0	0	53	1.82527e+06	1.24774e+06	0.417662	0.198472	2.05088	81.5111	17.6443	8.46256	4.30818	4.83941	2.08029	62.0299	14.799	8.01939	15.4254	47.4563	26.7854	98.2055	16.3189	8.37201	7.2682	16.3484	10.8069	42.0491	14.8881	12.3886	4.56024	7.55687	1.94879	30.3229	10.634	13.7444	4.53118	4.54049	2.68273	40.6216	12.7764	17.414	5.59534	5.66731
4	1	1	0.62963	0	0	1	0	0	53	1.35435e+06	1.26421e+06	-0.057406	0.212871	2.0811	106.482	19.2537	17.7642	5.23536	5.24501	2.20742	84.413	17.0245	14.9398	16.686	53.8677	31.2231	133.231	18.7491	14.2039	9.22386	19.0833	11.9782	44.1288	15.9872	23.6555	6.94347	9.16673	2.35456	37.0443	11.4711	24.4798	5.743	5.54911	3.10516	47.5245	15.2588	27.9825	7.85275	5.77863
4	1	1	0.666667	0	0	1	0	0	53	1.48364e+06	1.3723e+06	0.072262	0.296012	4.30628	107.533	20.1601	17.5874	5.39734	4.63394	2.16584	80.4755	16.7476	15.2534	15.0131	52.093	32.298	139.943	19.9593	15.5889	10.4979	18.1722	12.9473	45.6222	19.4432	19.6858	7.10222	9.05195	2.21136	37.0493	13.8646	23.9461	6.03341	5.21928	2.90836	46.011	19.8206	25.1988	7.88673	5.61611
4	1	1	0.703704	0	0	1	0	0	53	1.20312e+06	1.4305e+06	-0.216794	0.374292	2.20954	77.5882	16.9426	12.4675	4.87293	4.89321	2.23624	57.7696	14.6225	10.8795	17.2205	50.483	30.2673	101.454	16.0005	13.3366	9.88025	14.9587	10.554	35.2571	14.9267	15.9575	5.03793	8.60819	2.21736	27.0212	11.5419	16.268	6.27354	4.9681	2.9431	35.2776	12.8147	19.1352	6.41638	6.26216
4	1	1	0.740741	0	0	1	0	0	53	1.22638e+06	1.31092e+06	-0.197852	0.253496	2.15687	54.5415	17.6402	7.78474	3.25345	3.98632	2.04339	47.3072	14.5473	7.68502	14.2101	39.4726	27.7381	59.2744	15.6556	7.73309	7.41916	12.0761	8.72713	31.1559	14.2313	8.13134	3.75847	6.62085	2.19742	25.2266	9.68762	6.44383	3.93767	5.0087	2.71522	27.6143	12.3423	9.36122	4.69979	5.28183
4	1	1	0.777778	0	0	1	0	0	53	1.76536e+06	573453	0.33627	-0.482456	1.84171	98.2188	21.544	8.80587	4.4496	4.5266	2.34093	81.6878	16.5675	10.6401	15.8458	42.5584	28.01	116.073	19.7044	8.26232	7.75966	12.8779	9.49267	47.7062	19.3479	12.1549	5.16082	7.90987	2.47957	40.3495	12.3929	17.3979	5.33129	4.95989	3.05537	45.9782	17.7329	17.8873	6.25851	5.58089
4	1	1	0.814815	0	0	1	0	0	53	468704	706412	-0.958546	-0.381847	4.77827	55.9702	17.2303	5.17133	3.00253	3.24768	1.93388	51.7573	13.9911	6.74328	17.3952	23.8803	20.7161	55.5343	14.4093	5.55536	6.62186	10.0371	6.4621	32.6742	13.1479	5.96786	3.3031	6.81376	2.20034	27.9696	9.61793	6.52728	3.40803	4.00504	2.68538	29.3362	11.0438	5.53444	4.3281	5.52721
4	1	1	0.851852	0	0	1	0	0	53	671731	794955	-0.765446	-0.266191	2.00577	80.1789	19.3608	12.4858	3.82729	4.2535	2.10162	67.0577	16.2288	12.3726	15.3323	36.6958	27.6101	98.4776	18.9585	11.2113	6.79892	11.033	7.49222	39.6397	16.9216	16.6991	4.46174	8.86524	2.15608	33.2472	13.0313	22.4582	5.47736	4.93556	2.82535	41.2118	16.0234	19.826	4.93403	5.88417
4	1	1	0.888889	0	0	1	0	0	53	2.0626e+06	1.1745e+06	0.620309	0.116145	1.56794	101.4	24.832	15.1728	5.08084	4.60483	2.20573	87.8324	19.5188	12.6413	15.4805	42.9532	28.9518	111.891	21.7729	13.4736	8.48161	14.5341	9.70703	51.3787	21.9671	18.2391	6.52844	6.73083	2.13666	41.8862	15.422	22.3652	6.30847	4.51138	2.81281	49.51	21.6835	22.2642	7.11795	4.4334
4	1	1	0.925926	0	0	1	0	0	53	2.60102e+06	1.34122e+06	1.15753	0.265879	3.02983	91.4947	18.9437	18.41	4.81608	5.05634	2.5856	76.2451	16.1089	15.9444	15.4456	53.4783	30.6398	114.089	17.6802	16.2359	9.40472	13.1943	10.1789	41.3353	14.5941	19.1693	6.76989	9.82514	2.46294	35.0731	11.3772	30.7131	7.57705	5.35915	2.89992	43.8705	14.4049	27.1707	7.61212	5.25664
4	1	1	0.962963	0	0	1	0	0	53	1.74527e+06	1.34199e+06	0.295188	0.276898	1.87619	151.226	29.7276	16.3786	6.74819	5.68322	2.44029	116.356	27.5086	17.4969	20.4427	57.8696	32.0081	198.52	28.4271	14.646	11.407	16.3913	10.583	60.9447	20.9739	20.6164	8.05139	8.99053	2.64885	52.0327	17.9247	26.1	7.46901	5.63149	3.32401	65.6104	20.9214	27.695	9.41154	6.52011
4	1	1	1	0	0	1	0	0	53	1.39453e+06	1.23948e+06	-0.059828	0.17295	1.84454	91.1393	22.6264	13.0773	5.35835	5.04669	2.14039	83.8452	16.1705	12.7125	15.7911	53.8348	33.8545	110.003	18.4072	11.4188	8.9371	12.0332	8.60771	40.3147	19.0479	13.8189	6.45275	9.15158	2.15854	35.8527	13.3639	16.4792	6.94614	5.1676	2.96267	41.1654	16.3912	19.0011	6.70908	5.89186
4	1	2	0.037037	0	0	0	1	0	53	1.78951e+06	587152	0.115964	-0.645879	1.30087	72.7903	19.4064	6.62639	2.8696	3.26855	2.32865	66.9333	16.47	6.53225	4.89864	6.33362	6.10659	64.4932	18.9718	7.61309	8.5701	12.7715	18.6774	33.0672	12.8726	6.57763	3.13907	3.5895	1.9333	29.6821	9.55082	5.28849	3.59229	4.69808	3.94292	29.2165	10.385	6.59236	3.7395	4.52991
4	1	2	0.074074	0	0	0	1	0	53	1.3594e+06	735725	-0.311282	-0.504483	1.20915	51.1141	17.6843	6.11061	2.97789	2.93538	1.78745	52.772	17.0931	6.08	4.9951	8.60148	5.99922	47.6286	13.0993	6.03563	7.88421	9.62804	12.1613	28.3939	11.3959	6.69351	3.3715	3.65031	1.83663	25.6	9.57295	5.82231	4.13769	4.3588	3.4241	25.0321	8.76505	7.10431	3.79123	4.01068
4	1	2	0.111111	0	0	0	1	0	53	1.62252e+06	1.06557e+06	-0.045085	-0.182855	1.21769	53.9526	16.9656	6.35256	3.05311	3.56082	1.91491	50.0199	13.9255	5.40387	5.7516	10.827	9.2039	55.4167	15.4318	6.3739	7.22654	11.9052	12.2109	30.9454	13.0477	7.54307	3.41328	4.76027	1.94033	26.6979	8.67509	5.95597	4.35418	4.40926	3.79375	28.0689	11.3374	8.20428	4.30398	4.73163
4	1	2	0.148148	0	0	0	1	0	53	1.57198e+06	1.10669e+06	-0.09243	-0.150596	1.28754	44.5958	19.4222	5.55881	3.42514	3.1362	1.66097	45.3978	16.1962	5.31507	5.95468	9.26109	6.78805	43.4282	14.3923	5.5591	7.51698	8.28689	9.37806	25.4628	15.0489	6.09407	3.47177	4.87074	1.81063	23.3298	11.1803	6.04489	4.53285	4.00669	3.357	22.9736	11.0875	6.70468	3.7505	4.63585
4	1	2	0.185185	0	0	0	1	0	53	1.31895e+06	1.23776e+06	-0.342644	-0.026454	1.17161	52.3042	18.7999	7.86752	3.57713	3.96789	1.89152	54.9927	17.2876	7.23965	5.97398	12.0966	7.99185	45.1284	15.7907	7.26505	8.80681	9.5028	10.1651	30.4603	12.0023	8.95477	4.03126	7.12912	1.91082	28.8617	10.7916	9.41137	4.8705	4.96216	3.57061	25.0497	10.193	8.99556	5.22136	5.70647
4	1	2	0.222222	0	0	0	1	0	53	1.50491e+06	1.22541e+06	-0.153529	-0.04742	1.21839	46.7649	17.0353	7.3066	3.05923	3.27896	1.79913	40.3666	13.456	7.02807	6.10648	10.4493	7.03801	43.7381	15.5493	7.19753	6.70641	8.81312	9.94003	31.5273	12.7226	7.65296	3.0845	5.18256	1.77959	26.3424	8.64464	7.5326	4.11863	3.77105	3.3352	27.5232	11.4939	8.12234	3.54516	4.68159
4	1	2	0.259259	0	0	0	1	0	53	1.41444e+06	806597	-0.240948	-0.474376	1.2189	46.2104	15.9527	6.68414	3.3979	3.47737	1.99618	52.0089	14.2086	6.86021	6.16152	10.334	8.74441	43.3518	13.5411	6.58868	8.04296	9.72573	9.03874	23.5592	13.8479	8.34114	3.9856	4.05121	1.82014	25.6596	11.7748	11.8502	4.75242	3.71765	3.09199	21.5118	11.6281	10.7912	4.86826	4.23464
4	1	2	0.296296	0	0	0	1	0	53	1.36658e+06	720583	-0.285524	-0.569665	1.32865	65.7189	17.9924	7.02013	3.02473	4.074	1.79605	62.7328	15.8725	5.58666	5.91946	13.7142	8.32827	64.4888	14.6305	6.51662	7.53857	11.2409	9.89664	34.1132	12.3323	7.99421	3.57736	6.18785	1.72177	30.9251	9.57706	6.82825	4.00245	4.3372	2.69109	30.806	9.77789	8.07687	4.64427	5.31437
4	1	2	0.333333	0	0	0	1	0	53	1.4118e+06	743411	-0.237546	-0.55349	1.18657	36.1645	14.9017	4.68244	2.78003	3.21208	1.78195	35.2909	11.5555	4.79554	5.79289	11.1262	7.67977	36.928	12.9863	5.3026	6.70794	11.0129	10.181	24.7637	11.418	5.18166	2.60085	4.39894	1.89087	20.8757	7.49002	3.9597	2.80592	3.41864	2.38403	23.2876	10.4365	8.26216	3.15586	4.49371
4	1	2	0.37037	0	0	0	1	0	53	1.31051e+06	1.12161e+06	-0.335861	-0.182981	1.14382	56.2512	15.7427	6.72055	3.60765	3.54175	1.93092	50.7865	12.1386	6.41209	5.91413	12.3894	9.27128	59.0565	14.8468	6.86327	8.15343	11.474	11.2127	31.6555	10.8007	7.18832	3.94456	4.11825	1.82979	26.23	7.62206	6.35574	4.10707	3.39682	2.30813	28.9809	9.76174	6.77404	4.87393	3.82757
4	1	2	0.407407	0	0	0	1	0	53	1.56935e+06	1.65554e+06	-0.073839	0.34217	1.20594	44.9189	14.1195	6.78728	3.07359	3.67643	2.03452	50.5844	14.0054	7.48116	6.81683	13.5733	9.52389	39.5047	12.7704	6.58797	7.70536	11.3794	11.9588	29.025	11.0371	7.1637	3.16006	4.12661	1.99845	27.1298	7.83685	7.14441	3.37644	3.65002	2.27449	24.3584	10.148	7.93053	3.33634	3.95248
4	1	2	0.444444	0	0	0	1	0	53	1.87721e+06	1.45027e+06	0.236958	0.12936	1.14949	50.3826	21.3379	8.18934	3.41286	3.6891	2.05719	61.976	18.9585	7.81723	7.37022	19.6006	12.7614	43.7582	17.6135	8.16862	7.46208	11.1635	10.3667	27.9594	16.0538	9.49356	3.99715	3.94634	1.7816	29.0177	11.8042	8.35842	4.34022	3.14189	2.13663	25.2094	14.2362	10.1047	4.69714	3.61128
4	1	2	0.481481	0	0	0	1	0	53	908340	1.49711e+06	-0.72876	0.167583	1.19617	51.8593	20.144	7.93587	3.26748	3.8968	2.06827	55.4868	17.2198	7.68405	7.49352	21.8255	13.3358	42.6864	17.2161	7.45414	7.32299	12.8053	10.3243	29.5691	15.3023	8.98583	3.49285	4.61085	1.6768	28.0839	11.1754	7.84552	3.64384	3.57611	2.01056	23.0988	12.5764	8.7107	4.73556	4.37085
4	1	2	0.518519	0	0	0	1	0	53	2.08652e+06	1.72415e+06	0.452718	0.385241	1.31576	60.9822	22.7618	7.41669	3.95142	4.49712	2.25113	64.6242	20.1159	7.5547	8.598	20.6407	12.1855	56.3617	19.0975	7.92469	8.66887	12.5396	11.0414	32.177	16.4005	9.04211	3.683	5.59836	1.94082	32.3982	12.2639	7.19047	3.40435	3.7891	2.12425	27.4577	13.0936	9.05158	4.23196	5.08723
4	1	2	0.555556	0	0	0	1	0	53	1.94297e+06	1.59456e+06	0.312097	0.24818	1.25202	49.6021	17.0418	5.42681	3.35819	3.37237	2.10008	46.095	14.6741	4.9917	8.45367	15.4965	10.8335	50.322	13.7094	6.60829	8.12891	9.8904	9.4657	26.4252	12.4502	5.52981	2.85817	4.43002	1.70143	24.1752	9.27852	4.86272	2.95824	3.17391	2.10975	24.3961	9.8396	6.49033	3.20634	3.62326
4	1	2	0.592593	0	0	0	1	0	53	2.36698e+06	1.56956e+06	0.739215	0.21478	1.27772	52.2063	19.1237	5.76006	3.21023	3.98949	2.45671	49.4466	15.8667	5.84043	9.98876	20.181	18.8743	50.7909	16.3336	6.41267	6.79694	12.4085	10.0274	34.6167	15.2179	6.87623	3.48611	4.22605	2.44601	28.8239	10.5002	5.67516	8.59404	9.2066	19.8613	29.3236	12.92	8.1478	4.1563	5.03966
4	1	2	0.62963	0	0	0	1	0	53	2.03425e+06	2.1171e+06	0.409665	0.753553	1.33867	51.6343	13.6925	5.25224	3.37612	3.57878	2.11229	47.2244	10.7664	5.58647	9.44627	22.0232	16.9375	52.3034	11.6131	5.61413	7.28164	11.2652	9.10759	31.9736	12.1038	7.10061	3.44106	4.46719	2.36882	26.1772	7.84669	8.27979	7.24727	10.7542	18.7938	29.9728	9.85667	8.66617	3.90062	4.78698
4	1	2	0.666667	0	0	0	1	0	53	1.60115e+06	2.10117e+06	-0.020582	0.730505	1.2416	48.8101	16.2928	6.15693	2.93325	3.97198	2.33661	50.7985	15.8575	6.29556	9.47017	24.6118	19.0533	45.8321	14.3073	6.16811	6.31124	11.6315	9.00105	30.9257	12.8866	6.6443	3.57401	4.77892	2.67238	28.7038	10.3862	6.76169	10.9057	12.6356	22.6144	27.57	11.6406	6.85983	4.38258	5.14185
4	1	2	0.703704	0	0	0	1	0	53	2.05231e+06	1.63658e+06	0.433807	0.256923	1.32382	44.7528	16.4549	5.65973	3.58276	4.15737	2.45458	40.703	14.5072	6.55997	10.9383	26.8215	21.4637	49.9773	15.0106	5.7709	7.14434	13.5337	10.3941	27.34	13.1926	7.67032	3.85683	5.02603	2.69237	21.1891	8.99366	8.88093	10.8878	13.4694	23.8541	25.68	11.6151	9.01799	5.36638	5.91799
4	1	2	0.740741	0	0	0	1	0	53	2.20477e+06	1.65351e+06	0.589297	0.265834	1.31258	36.0538	18.3912	5.36378	3.09804	3.63689	2.23925	37.7541	14.8547	5.92482	9.52432	25.8054	21.506	36.3245	15.5921	5.21044	6.84392	12.7788	10.3751	24.8052	16.0092	6.83539	3.7728	4.96241	2.51861	23.2313	11.2684	8.05974	9.26375	16.3288	23.3648	21.6732	13.5888	8.46744	4.79717	4.72886
4	1	2	0.777778	0	0	0	1	0	53	1.90565e+06	1.87596e+06	0.293322	0.47971	1.35497	57.9597	20.4512	6.674	3.55859	3.61756	2.34746	62.065	16.135	7.77446	10.1758	20.5477	18.1774	55.239	16.8542	7.68187	8.21917	11.2193	9.36263	32.4399	16.2169	7.42836	3.66422	4.44887	2.77127	30.3906	11.4135	8.34784	9.77617	15.6322	23.8739	28.277	12.8531	9.39695	4.56064	5.65919
4	1	2	0.814815	0	0	0	1	0	53	1.89097e+06	1.60371e+06	0.281475	0.200453	1.24776	46.3184	18.1219	5.44234	3.31946	3.77359	2.39012	41.0806	13.9831	6.46095	10.6894	27.0855	20.7265	51.3955	15.6447	5.40197	7.2867	12.9718	9.76048	26.5358	14.5949	6.44541	3.19552	5.77708	2.7921	22.3919	9.63484	7.66978	10.0584	16.5086	24.9004	25.6136	11.85	6.5353	4.23633	6.25033
4	1	2	0.851852	0	0	0	1	0	53	983253	1.20442e+06	-0.623181	-0.207008	1.25081	41.8016	22.2317	6.47391	2.91207	4.30962	2.39808	39.8819	17.1016	7.0963	10.2886	26.5043	20.7611	46.1477	18.2423	7.32093	8.08293	13.613	10.3689	25.6355	17.1408	8.1542	3.11223	5.45494	2.8036	21.4213	12.2896	11.0575	9.72335	16.6783	23.8902	22.8454	13.8551	10.693	4.67483	5.65872
4	1	2	0.888889	0	0	0	1	0	53	1.07404e+06	1.17743e+06	-0.52931	-0.242265	1.26374	43.906	13.4594	3.81697	2.91043	4.65966	2.65929	37.9855	10.0968	4.86055	11.26	27.0193	21.2911	43.167	12.6031	3.71886	7.91611	15.5972	11.6927	29.2241	11.2314	3.94521	2.82095	6.62239	3.09555	23.365	6.87788	5.51015	12.0187	16.8168	27.0987	24.9896	9.93053	3.61603	3.46009	6.38978
4	1	2	0.925926	0	0	0	1	0	53	1.38872e+06	1.28748e+06	-0.211128	-0.142634	1.48361	59.0401	19.3327	7.12309	4.27067	4.71228	2.40319	56.1934	16.3886	8.24857	12.0457	29.1344	23.4983	59.1099	15.9914	6.65618	9.02741	16.2791	11.6685	32.4129	17.5072	8.07464	4.69288	7.58673	2.69866	29.0673	12.2206	12.0831	11.8818	17.0534	26.371	28.952	14.1387	9.20192	5.99838	6.57661
4	1	2	0.962963	0	0	0	1	0	53	1.57506e+06	1.09848e+06	-0.02213	-0.337744	1.2895	39.0816	15.6606	4.95501	2.94511	3.77564	2.39395	35.6692	11.8384	6.40038	12.2518	26.2265	21.1353	39.3691	13.238	5.77189	8.25437	12.4566	9.56303	28.66	12.6192	5.79442	2.99477	5.14306	2.94837	22.6531	8.18085	7.21575	11.5865	16.0389	26.5187	25.7252	9.92196	7.08536	4.4803	4.94565
4	1	2	1	0	0	0	1	0	53	1.31872e+06	810392	-0.275418	-0.633936	1.2864	49.0637	19.4169	7.06559	3.50495	4.45472	2.41234	48.2874	16.3347	8.68442	13.2556	32.1135	24.7292	51.7723	17.5205	6.85617	7.09347	13.247	10.1035	28.8057	14.7237	7.75954	4.13921	6.79546	2.87835	24.8546	10.4645	9.79334	12.1016	16.0189	26.9763	25.1308	13.1241	8.18833	5.39364	5.96412
5	0	0	0.037037	0	1	0	0	0	32	1.18769e+07	6.46059e+06	0.643944	0.867538	1.1842	235.714	56.9592	15.8729	7.48751	7.06303	2.96079	214.507	45.7147	15.0936	15.418	20.1521	20.5339	279.596	63.1972	15.8229	7.71629	7.27287	3.41062	67.0139	25.1611	16.9311	8.01353	9.23304	4.10771	55.6764	19.1439	16.4305	13.8281	23.6821	18.5217	74.3587	23.5998	23.3087	8.50711	9.34591
5	0	0	0.074074	0	1	0	0	0	32	1.52459e+07	7.50569e+06	4.40523	2.05186	1.18738	253.595	54.1957	15.4394	7.94368	5.86644	2.25166	229.049	43.532	10.739	11.9234	19.7686	23.2007	292.039	52.1971	18.0737	8.25162	6.77207	3.01374	80.2727	26.4103	14.7611	9.41259	7.84533	3.05583	65.3988	18.6966	11.6076	11.1217	18.4219	11.8339	82.5008	24.1085	24.901	11.4285	7.98719
5	0	0	0.111111	0	1	0	0	0	32	1.56397e+07	9.88544e+06	5.19123	4.57128	1.14692	254.753	59.7278	19.4299	9.27169	6.31757	2.264	220.913	47.3288	16.3146	15.733	16.8868	19.5294	338.085	65.3347	19.2732	9.79764	7.28261	2.90057	84.4066	28.5207	20.4998	9.88283	8.44384	3.75811	64.8812	19.471	17.9	12.2243	15.254	9.7225	98.3167	28.204	26.5158	12.1155	8.21129
5	0	0	0.148148	0	1	0	0	0	32	1.40748e+07	5.60282e+06	4.01886	0.42708	1.22704	254.32	52.1353	17.4199	9.18913	5.81314	1.74838	219.247	44.8165	11.3968	16.2924	16.0139	21.2945	279.385	47.9176	17.0842	10.1541	6.92563	2.53446	86.7468	23.5941	20.1633	10.2649	8.1349	2.60947	68.4138	19.0818	13.9979	9.73484	10.8763	5.69628	88.7156	21.3977	26.7963	11.4678	9.23412
5	0	0	0.185185	0	1	0	0	0	32	1.313e+07	5.24126e+06	3.46618	0.205453	1.16251	312.391	68.5925	19.0286	8.21652	4.48497	1.58695	276.449	53.021	14.1304	16.0611	17.6159	20.265	358.2	75.9612	21.7178	9.59752	6.02556	2.27504	86.8104	27.8993	21.2018	9.17602	6.2819	2.23333	73.8037	19.4444	14.45	9.80196	7.67473	4.19522	92.8328	28.4827	29.0534	12.3876	6.53837
5	0	0	0.222222	0	1	0	0	0	32	1.32158e+07	6.10879e+06	3.94435	1.2119	1.19431	325.874	68.5598	28.1287	11.4609	5.68287	2.1356	284.753	59.0462	24.9879	21.2831	15.7013	23.3551	400.652	69.7457	29.8485	12.3298	7.08548	3.06311	102.425	25.2534	28.2597	11.6025	7.18306	3.06058	79.9557	21.1047	22.6228	12.7255	8.68941	6.12869	115.837	24.7294	36.1886	14.8407	7.77789
5	0	0	0.259259	0	1	0	0	0	32	1.21698e+07	3.63313e+06	3.29048	-1.12363	1.10938	226.219	51.6885	16.2128	8.17099	4.91297	1.39948	210.902	41.928	12.4626	16.351	17.3282	20.4011	249.855	48.2894	16.4007	8.68973	5.77034	2.14219	76.9442	29.8835	18.0179	9.502	6.10825	2.20381	61.211	19.7382	13.3264	9.32652	6.78534	3.80357	81.9754	26.4577	21.7562	11.5132	6.94036
5	0	0	0.296296	0	1	0	0	0	32	1.09188e+07	4.49422e+06	2.43174	-0.122948	1.07738	252.029	46.8673	16.1397	8.95145	5.95367	1.39337	238.576	39.9295	13.0413	15.3617	18.6861	20.2192	267.187	42.2867	16.5682	10.9934	6.62223	2.11088	94.8897	23.1989	17.6093	10.0145	7.67764	2.25608	80.7507	16.9504	14.4237	9.01553	8.42412	3.25936	93.4882	22.0756	24.4589	13.691	7.80295
5	0	0	0.333333	0	1	0	0	0	32	1.08072e+07	5.6079e+06	2.71249	1.12962	1.11356	459.831	84.3876	16.5106	10.3012	4.90721	1.55682	416.747	70.6814	13.9476	16.562	20.8334	22.7376	556.372	88.4878	15.9684	11.0076	6.4895	2.56491	135.787	32.1541	15.8578	13.1823	7.22049	2.33942	106.282	25.8432	14.1033	12.3116	7.93869	4.03782	155.544	32.841	19.245	15.7343	8.10388
5	0	0	0.37037	0	1	0	0	0	32	8.37558e+06	6.09891e+06	0.673319	1.75903	1.1947	439.063	100.285	23.2773	9.18233	5.44185	1.50659	399.612	82.3308	19.9791	19.4747	17.1249	21.4406	526.021	101.209	23.4066	10.2364	6.88594	2.45462	122.748	33.8546	22.6301	10.6151	7.27868	2.27059	100.248	25.7141	17.6116	10.7911	9.067	4.07151	139.021	32.8588	23.194	13.5	7.91572
5	0	0	0.407407	0	1	0	0	0	32	5.64709e+06	3.60152e+06	-1.66273	-0.599813	1.26257	280.635	64.2728	15.6172	6.29598	4.18737	1.52422	258.559	56.6674	12.4831	16.9796	15.4358	22.6987	326.352	61.5896	17.8573	8.44177	6.35743	2.47283	86.2642	28.0958	16.9899	7.50623	6.19274	2.30734	69.5987	22.1413	11.2431	7.67126	7.36059	3.77303	92.6247	27.5263	22.1235	12.0166	6.86835
5	0	0	0.444444	0	1	0	0	0	32	5.2006e+06	3.88457e+06	-1.71714	-0.176456	1.16159	578.132	107.94	17.8997	8.54757	5.5632	1.59252	456.943	82.6381	14.0022	17.113	15.4313	21.3827	689.998	118.376	21.2645	11.0617	6.96918	2.46764	157.433	40.5643	15.647	9.73165	6.81104	2.47418	123.469	30.9986	13.2409	8.92927	7.42808	3.6715	178.436	40.0749	17.5456	14.0321	6.94968
5	0	0	0.481481	0	1	0	0	0	32	3.25432e+06	4.62931e+06	-3.2712	0.707939	1.1227	274.077	91.6182	26.5103	13.0476	6.08368	1.54025	221.553	72.1966	22.2619	22.0562	16.5738	22.3454	380.535	106.84	26.9592	14.3223	7.15073	2.77875	86.9231	33.6709	30.5842	14.0118	7.74365	2.53706	65.4797	27.3744	26.7572	14.1499	7.90756	3.78456	106.585	35.4719	36.9212	19.0966	8.02018
5	0	0	0.518519	0	1	0	0	0	32	2.94464e+06	3.32111e+06	-3.18847	-0.461557	1.17535	371.908	83.9354	20.0958	11.2059	4.82134	1.73931	344.118	74.6599	17.1504	22.6453	15.2044	22.1736	452.757	79.8446	20.805	12.4068	6.2005	2.84618	107.793	34.5275	22.7339	13.3574	6.95709	2.59931	90.9237	29.6076	18.9437	13.6863	7.28147	4.17048	121.184	31.5561	25.2871	16.1845	7.24968
5	0	0	0.555556	0	1	0	0	0	32	3.5179e+06	3.15939e+06	-2.22296	-0.483839	1.15804	464.175	91.0004	22.2343	11.38	6.71348	1.7848	407.162	80.2662	18.0844	19.4616	22.0349	22.7563	548.093	94.7647	23.5178	11.2503	7.19123	2.75657	122.584	30.3338	22.7528	12.3443	8.35421	2.44405	101.715	26.894	20.1849	12.0135	10.8399	5.52599	137.612	29.1502	23.848	15.1632	8.54976
5	0	0	0.592593	0	1	0	0	0	32	3.70218e+06	2.85039e+06	-1.64636	-0.653719	1.17109	384.731	81.3517	21.781	9.37988	5.86449	1.74439	331.27	67.5199	15.6406	15.1864	21.8627	20.9672	443.906	88.0211	22.1801	12.2036	7.2443	2.86035	113.982	29.2369	21.3644	11.3378	7.8699	2.52221	90.2343	22.7338	15.98	11.3717	10.5681	4.5856	128.052	29.775	24.0578	16.5562	7.46657
5	0	0	0.62963	0	1	0	0	0	32	2.75045e+06	2.96822e+06	-2.20588	-0.396167	1.12568	305.469	69.4077	13.232	6.85695	4.32952	1.73501	306.58	53.3167	10.6328	17.2655	14.9213	22.2767	350.49	75.8512	13.7777	8.90822	6.13532	3.00974	100.105	34.609	14.9413	7.91505	5.81058	2.58836	90.5805	24.1298	11.5874	7.9998	7.63881	4.45654	103.37	32.2574	17.3836	10.3644	5.93786
5	0	0	0.666667	0	1	0	0	0	32	1.89262e+06	2.59778e+06	-2.67151	-0.626895	1.08203	336.773	84.2706	22.1516	8.37759	4.82284	1.62283	250.057	58.3264	16.5237	18.6064	13.9562	22.4621	443.81	95.6651	22.002	10.4465	6.39599	3.01101	112.912	37.7319	20.098	8.56842	6.99307	2.39712	84.5396	25.0561	14.9441	8.90634	8.73443	4.16353	129.151	41.4661	23.0467	11.7108	7.43817
5	0	0	0.703704	0	1	0	0	0	32	2.32185e+06	1.71594e+06	-1.85003	-1.36921	1.05556	419.102	76.2818	21.248	8.98703	4.48244	1.63954	390.897	62.0666	13.7478	16.9352	16.1065	21.2797	486.91	82.556	20.6731	10.9631	6.76461	3.20243	119.13	24.7254	17.6423	9.06663	5.94759	2.58326	100.023	20.0752	11.4246	8.73385	7.3204	3.79334	132.687	26.1763	21.4173	11.1571	6.51905
5	0	0	0.740741	0	1	0	0	0	32	2.37145e+06	1.76904e+06	-1.40776	-1.17876	1.23807	294.759	64.6057	17.6701	7.36939	5.40844	1.5616	267.16	52.9255	14.3186	19.1105	14.8901	20.155	335.558	63.3056	16.1669	9.00164	6.47834	2.97872	102.2	27.2799	17.5581	7.21268	6.47308	2.33929	83.559	20.3059	11.9173	8.31888	8.66995	4.24082	103.667	26.8241	19.7255	8.99201	7.62541
5	0	0	0.777778	0	1	0	0	0	32	2.32001e+06	2.29558e+06	-1.06709	-0.512017	1.1473	529.975	97.4011	24.2363	10.6838	6.3843	1.55983	447.082	76.8387	17.104	16.9386	21.3794	23.0503	620.7	103.705	27.6735	13.8181	7.88246	3.03413	140.247	32.6298	23.6119	13.4681	8.19034	2.32641	113.285	24.8625	16.8007	11.1714	9.26468	3.89284	153.055	32.0898	26.7594	17.8117	8.10448
5	0	0	0.814815	0	1	0	0	0	32	2.1276e+06	2.45138e+06	-0.866956	-0.218215	1.26793	559.736	118.219	31.1187	11.2611	5.39729	1.73645	461.425	87.4922	22.7385	20.8788	17.8	23.5282	682.879	127.891	29.8619	12.4504	7.52562	3.293	153.419	46.4025	27.7143	12.5543	7.48323	2.67463	120.313	33.4589	18.3886	11.2496	8.83885	4.19935	172.464	46.3618	31.3467	16.5048	8.21419
5	0	0	0.851852	0	1	0	0	0	32	1.99393e+06	1.84672e+06	-0.608569	-0.682456	1.15534	334.576	73.7772	18.2718	10.5483	6.59528	2.98316	323.242	61.6891	18.9856	20.631	17.395	27.5783	383.189	75.9467	19.6998	12.1318	9.50065	5.27242	106.637	27.4591	18.4657	10.7623	7.74847	3.62539	96.4349	21.396	16.2815	10.4725	11.7555	9.50002	109.534	27.7752	23.3443	12.4836	8.37749
5	0	0	0.888889	0	1	0	0	0	32	1.28097e+06	1.66531e+06	-0.92925	-0.724499	1.14438	550.486	98.1988	13.2266	7.74149	4.44496	2.06193	429.589	71.7616	10.4341	20.158	18.8327	23.0942	707.952	116.498	15.3094	10.111	6.75868	4.44015	173.229	34.0378	10.9704	8.07383	5.42826	2.75773	125.491	25.9474	7.75735	8.58722	9.38204	7.57402	199.168	35.1682	13.7307	9.27113	5.48144
5	0	0	0.925926	0	1	0	0	0	32	1.21629e+06	2.06384e+06	-0.601618	-0.1868	1.15241	395.414	74.3945	17.9345	8.37104	5.27155	1.91908	326.279	52.8155	13.959	17.9461	21.2815	22.0855	525.522	84.414	17.1676	10.191	7.32182	4.02241	110.805	32.8627	18.6612	10.2209	6.45288	2.53083	85.8784	23.4158	14.1647	10.1305	9.29008	5.68312	133.95	33.202	19.3625	13.5105	6.23657
5	0	0	0.962963	0	1	0	0	0	32	2.35628e+06	2.05476e+06	0.930888	-0.05775	1.26094	445.052	95.627	20.0554	10.4699	5.41979	1.75557	384.883	76.715	19.4532	17.5453	14.3581	22.9869	584.916	109.104	21.8489	10.4749	7.22539	3.88616	126.415	32.3067	19.3327	11.1956	6.6052	2.54644	105.975	27.611	16.9588	10.5783	8.54685	4.97185	145.491	32.7019	25.1344	11.7139	7.19321
5	0	0	1	0	1	0	0	0	32	2.73805e+06	2.17893e+06	1.70468	0.207061	1.12698	627.679	124.308	29.0897	12.8062	5.485	1.98009	501.353	93.5277	22.8876	16.3178	15.8837	21.0591	804.769	144.28	27.6005	14.9111	7.2974	4.18527	179.812	45.8973	24.4323	13.7585	6.96112	2.73033	139.386	33.2221	19.0579	11.248	7.68822	4.34034	208.085	47.6887	26.2046	17.8131	7.64524
5	0	1	0.037037	0	0	1	0	0	32	1.8694e+06	1.98135e+06	-0.02325	0.225547	1.24199	430.654	88.0377	20.0274	9.64822	5.01943	1.54887	364.339	67.2051	15.6519	19.4636	18.2078	24.9147	513.213	97.9565	22.6392	8.94972	4.82757	1.86665	116.114	29.3971	21.9598	9.60636	7.65721	2.41901	90.7028	22.3188	16.1223	9.35338	8.45346	4.28196	130.572	30.75	27.0066	11.7695	8.14856
5	0	1	0.074074	0	0	1	0	0	32	2.93004e+06	2.02013e+06	1.05786	0.284923	1.11191	451	108.817	18.009	8.95565	6.18063	1.45327	411.132	90.7706	16.2023	16.5132	17.0279	18.2554	554.829	117.464	20.2475	9.01229	6.19051	2.27128	125.101	35.9846	18.4645	9.7393	8.81389	2.29677	96.8361	29.2839	16.2905	9.00574	7.73493	3.17867	145.068	37.0479	25.9437	11.0703	9.20263
5	0	1	0.111111	0	0	1	0	0	32	1.55797e+06	1.64091e+06	-0.293375	-0.075485	1.15269	500.053	98.4888	20.4981	9.93828	5.684	1.71463	427.753	78.5534	15.3311	14.3165	14.0704	14.7708	601.189	107.996	19.2137	9.67274	6.14129	2.71296	140.801	33.7156	18.6222	11.5814	7.45597	2.76546	111.838	25.8175	14.2792	10.7359	9.26378	5.3311	160.397	37.6815	23.1471	14.1377	7.72777
5	0	1	0.148148	0	0	1	0	0	32	1.09796e+06	1.02135e+06	-0.732775	-0.675116	1.08576	279.825	70.3388	19.2192	7.6404	4.74311	1.63534	233.901	53.7147	15.2544	11.3334	8.71972	9.93844	353.142	78.5398	19.5874	8.67061	5.52028	2.88177	89.6323	28.093	22.5095	8.21766	6.36172	2.76269	71.7086	21.3702	18.1073	8.73383	7.38064	4.76085	105.921	28.8337	26.2745	9.18561	7.08574
5	0	1	0.185185	0	0	1	0	0	32	1.52457e+06	1.21626e+06	-0.28527	-0.461726	1.15886	446.66	88.7965	15.0473	7.84313	5.08836	1.61872	356.425	72.0912	13.7319	10.6424	13.3988	12.8893	536.716	94.2957	16.6178	9.15798	6.6731	3.57943	131.639	33.8863	15.8231	8.56781	6.79795	2.73306	103.817	26.5221	11.7852	8.17535	7.86264	4.04507	150.37	33.3951	18.7509	11.1762	6.94248
5	0	1	0.222222	0	0	1	0	0	32	2.36911e+06	2.35797e+06	0.57998	0.699368	1.1445	1042.66	148.715	21.8011	9.82649	11.2436	7.10737	734.164	116.275	19.7828	19.0347	49.4247	52.2353	1289.26	171.112	24.6706	12.9594	19.8098	18.3679	326.926	45.4175	17.454	10.5669	11.9048	7.5132	250.613	35.0831	14.054	11.7791	23.7266	16.7987	375.924	49.4313	21.412	14.0326	17.9484
5	0	1	0.259259	0	0	1	0	0	32	1.1517e+06	1.61764e+06	-0.611553	-0.047631	3.63201	420.42	75.7399	17.3483	9.26434	5.56734	2.12417	347.955	64.068	14.0586	12.7578	13.8749	16.7858	477.09	82.3623	17.4401	10.0303	7.7128	5.56566	140.16	29.1173	21.9026	11.1973	7.21006	2.72248	108.405	22.1681	14.1587	10.143	6.04725	3.66418	147.034	29.9532	28.2207	11.8635	8.41129
5	0	1	0.296296	0	0	1	0	0	32	2.65378e+06	2.138e+06	0.90596	0.518808	1.05459	571.929	90.3714	22.5292	12.0352	12.0148	9.34826	446.753	83.0495	23.2311	25.8185	32.6257	33.0368	822.926	110.784	23.6227	14.1849	24.7688	22.6015	181.743	35.9592	23.7087	11.7795	14.2539	10.7488	154.191	38.1477	20.2552	17.4209	19.6288	29.578	229.337	37.7399	26.8555	13.4621	22.2427
5	0	1	0.333333	0	0	1	0	0	32	2.01964e+06	1.60466e+06	0.293021	0.002384	1.27788	787.473	88.3657	22.1034	9.55138	5.31704	1.61897	545.845	69.435	17.1364	11.771	12.4652	11.4326	939.881	100.58	21.5254	11.8141	6.70707	4.99294	255.931	30.142	21.6528	10.8669	6.96464	2.50978	179.793	22.1127	13.8784	9.17113	5.20516	2.12713	282.543	32.832	26.8264	14.5292	7.64951
5	0	1	0.37037	0	0	1	0	0	32	1.83961e+06	1.67739e+06	0.137693	0.074368	3.19652	403.883	72.4255	21.9423	8.40788	5.48002	3.49457	364.871	68.6938	18.6911	12.0493	15.9689	25.6445	484.988	72.3368	21.6644	11.1765	9.29217	8.84231	117.038	29.0385	25.2905	9.64788	6.81955	3.72031	89.2926	23.805	16.9865	8.10896	6.75031	6.9381	133.261	28.3245	31.116	11.7849	8.55973
5	0	1	0.407407	0	0	1	0	0	32	1.43355e+06	1.21771e+06	-0.251688	-0.345524	1.22269	207.88	47.0005	16.2855	8.4132	4.86658	1.49658	187.212	36.4126	13.6072	11.2474	9.31081	10.3656	265.323	50.0741	17.311	11.3103	7.35992	4.97936	79.7719	27.0173	21.6805	7.70026	6.21458	2.3411	62.713	17.9897	14.7305	6.4356	5.97334	2.53118	89.4623	27.0463	26.2804	11.097	7.1871
5	0	1	0.444444	0	0	1	0	0	32	1.69574e+06	1.45289e+06	0.032674	-0.098333	1.91666	293.887	58.5338	21.0941	8.25704	5.00079	1.61706	233.216	41.6733	14.8834	12.4293	9.70841	10.212	364.703	62.5623	20.994	10.8157	6.70985	5.1393	105.93	28.6303	23.3769	8.04425	6.31052	2.46374	76.2494	19.0459	17.3418	7.04833	6.00002	2.39468	114.782	27.867	25.9451	9.12115	6.77834
5	0	1	0.481481	0	0	1	0	0	32	1.26722e+06	789142	-0.376156	-0.737497	1.40353	323.549	56.533	20.5986	10.3663	5.35758	1.53932	284.86	48.0918	16.2389	11.8977	10.2025	10.4028	356.406	56.5072	19.1216	14.1862	7.01937	5.3595	110.613	28.4257	26.2064	11.357	7.841	2.39024	86.9622	21.4539	21.7201	8.96851	6.43655	2.30577	116.228	28.2862	30.429	15.3194	8.37797
5	0	1	0.518519	0	0	1	0	0	32	1.44014e+06	1.11182e+06	-0.182703	-0.394543	1.30344	280.504	54.0183	18.8529	10.1812	5.12367	1.63011	247.566	43.8268	15.0666	12.754	10.3847	10.7701	377.844	59.1625	17.3408	11.9673	7.18048	5.73978	89.3637	27.6523	18.3216	10.4397	6.87761	2.37193	67.8295	18.803	12.7294	8.45874	6.11275	2.10532	106.371	27.0862	20.3933	13.2821	7.82939
5	0	1	0.555556	0	0	1	0	0	32	1.20957e+06	1.61454e+06	-0.392601	0.127824	1.26463	641.491	112.322	28.1731	14.1722	9.11181	7.14327	609.395	94.5193	26.9262	20.719	28.6271	54.6519	735.336	125.764	29.8645	20.7706	17.3438	16.3992	177.53	40.307	21.7659	16.1646	10.3624	7.02191	159.25	34.904	19.6789	14.5847	14.7822	20.363	191.865	43.3359	24.946	23.2091	13.997
5	0	1	0.592593	0	0	1	0	0	32	1.45188e+06	1.00233e+06	-0.129646	-0.464655	1.21738	282.83	64.4968	17.1496	10.0091	5.14148	1.47327	235.405	47.6336	12.7986	13.2371	14.2084	12.1524	335.894	69.6659	18.816	11.5607	8.45223	5.84593	94.0728	27.8141	14.9426	11.1193	6.618	2.10539	72.0022	20.5835	11.7501	9.96932	5.51976	1.88193	102	28.7894	17.64	15.276	7.43981
5	0	1	0.62963	0	0	1	0	0	32	1.41551e+06	1.16473e+06	-0.144414	-0.287332	1.63075	363.636	80.2027	20.705	8.60179	4.94221	1.42568	309.202	59.0628	15.8591	14.2279	14.3074	14.9944	413.153	84.6403	21.2991	11.5949	8.00001	6.11533	118.323	31.2922	18.5344	10.9949	6.80898	2.17938	94.2366	22.5794	14.0876	10.796	5.99778	1.79411	122.889	32.5505	24.4573	13.7667	7.20361
5	0	1	0.666667	0	0	1	0	0	32	1.06855e+06	1.22714e+06	-0.471424	-0.201693	1.24806	259.782	65.7226	17.4911	6.94351	3.87861	1.3457	223.942	46.1741	13.1633	12.9491	10.1351	13.4705	335.428	71.3091	18.984	10.3906	7.56944	5.42832	90.5523	29.8144	17.9376	7.43062	5.21288	1.9668	70.2346	20.5562	12.4978	5.61745	3.94504	1.48718	100.832	29.5237	23.8424	8.79051	5.8514
5	0	1	0.703704	0	0	1	0	0	32	1.34621e+06	1.1529e+06	-0.165619	-0.294051	4.83401	502.883	107.376	27.3699	9.88326	5.39138	1.39634	429.169	86.2249	21.664	14.4582	11.9452	14.1728	604.031	114.071	31.9164	13.4479	9.51205	5.78677	134.698	36.1427	25.0048	9.86826	7.3588	1.94743	111.943	29.7926	22.7286	7.55176	5.38176	1.53471	152.183	36.2998	29.1138	13.8309	8.04276
5	0	1	0.740741	0	0	1	0	0	32	1.58956e+06	1.42243e+06	0.092454	0.025132	1.91432	413.434	77.7571	22.2288	9.77735	4.99307	1.30034	342.309	56.7833	15.376	16.3692	13.3678	13.7047	537.832	93.4457	23.533	13.168	7.66091	6.07905	109.501	34.3016	21.2153	12.2877	7.58985	1.91367	84.2337	24.0909	16.1449	9.48767	5.99389	1.60527	128.65	35.0367	23.1771	15.189	7.14461
5	0	1	0.777778	0	0	1	0	0	32	1.48071e+06	1.53251e+06	0.003283	0.159807	1.39989	539.641	96.3722	23.4717	11.7388	5.31932	1.39355	405.377	71.4904	16.6961	16.1546	12.5185	16.1171	694.232	108.961	24.3628	14.2854	9.98255	5.78479	153.439	34.8174	22.9317	13.7044	7.83231	2.1061	112.925	24.8881	16.0212	11.6327	5.57959	1.6735	183.212	37.139	27.7672	16.8697	7.59677
5	0	1	0.814815	0	0	1	0	0	32	1.87794e+06	1.67589e+06	0.423914	0.309058	2.68343	421.387	91.7855	24.8106	9.72602	6.06538	2.43086	389.754	67.1932	19.4656	19.4119	17.9704	21.9957	513.59	107.775	26.5669	13.5277	8.95733	7.58848	114.61	38.1781	23.9086	11.6523	8.05477	2.94272	94.9028	28.6184	18.7039	11.2179	7.70256	5.09589	127.344	38.8918	25.5353	14.0043	8.17394
5	0	1	0.851852	0	0	1	0	0	32	992247	1.72238e+06	-0.44089	0.374028	2.75535	344.906	64.9896	20.9282	9.32591	5.02769	1.35532	294.221	50.6247	15.1555	15.7926	12.6648	14.4714	449.273	72.0188	22.0332	12.5615	8.20597	5.69227	110.278	30.5118	22.5905	13.4603	7.29093	2.09883	83.4309	22.4495	15.9017	11.0027	6.64843	2.466	126.271	29.0806	24.9104	15.5644	7.18701
5	0	1	0.888889	0	0	1	0	0	32	857678	1.27e+06	-0.557684	-0.044114	1.31527	632.228	98.6969	26.8083	13.0743	4.76516	1.43033	557.605	83.906	20.6367	19.6575	13.0224	16.4609	709.803	107.956	25.8598	16.4146	7.83249	5.70938	177.594	36.2681	24.3128	14.1036	7.19095	2.11105	147.731	29.5241	15.3128	13.4925	5.88205	2.06298	196.359	36.0468	26.6757	19.272	7.72712
5	0	1	0.925926	0	0	1	0	0	32	1.80544e+06	1.25647e+06	0.410659	-0.037565	1.23479	643.907	107.827	39.7924	11.4903	5.49033	1.3321	527.816	85.266	34.5631	15.2229	14.4078	17.4833	837.182	120.149	34.9174	15.1904	7.38514	5.77197	170.716	42.396	35.9177	12.6687	7.45412	1.95825	126.031	31.6564	28.6153	12.2949	6.18756	1.97608	211.404	45.5601	37.3752	16.4361	6.72262
5	0	1	0.962963	0	0	1	0	0	32	1.71412e+06	1.40714e+06	0.340517	0.130152	1.44488	459.646	83.3203	21.6653	8.90297	5.3672	1.41213	393.896	65.4339	15.3505	17.4804	17.1489	18.6104	550.316	90.4497	25.2079	12.0386	8.5238	5.98376	114.603	32.9214	22.0728	9.81699	6.599	1.90229	92.4654	24.1124	13.847	8.641	5.6533	1.56786	126.983	33.0699	26.1825	11.252	6.66031
5	0	1	1	0	0	1	0	0	32	1.57336e+06	1.63512e+06	0.219884	0.380508	1.14386	603.657	106.729	23.8935	11.5726	4.94015	1.38896	484.634	78.1498	20.2545	18.9867	17.5817	20.131	737.827	134.129	25.4677	15.6319	9.33934	5.71181	171.267	32.5816	23.0028	13.0626	7.27989	2.12494	132.214	23.6372	17.7212	10.4175	5.9363	1.64475	190.336	36.4434	26.951	14.9949	7.89048
5	0	2	0.037037	0	0	0	1	0	32	1.02157e+06	903870	-0.584334	-0.558943	0.986058	444.902	108.673	29.3227	12.0527	4.91505	1.2701	365.067	81.1785	22.3966	16.4081	17.9816	22.076	580.088	120.481	30.0581	12.0141	5.17051	2.18869	126.249	37.7249	26.5915	14.3173	5.92835	2.05489	94.6042	28.4794	19.2433	10.3676	4.76029	1.99014	155.088	39.7697	29.2488	15.4854	5.73908
5	0	2	0.074074	0	0	0	1	0	32	1.39741e+06	1.31809e+06	-0.199045	-0.131118	0.970419	664.16	114.969	37.8026	10.1801	4.54858	1.35245	593.976	92.1961	26.4443	15.4852	19.2436	22.6058	718.097	119.36	32.4055	10.8194	4.63572	2.0427	170.583	37.3181	28.6598	11.4826	6.48225	2.12196	148.78	29.5052	24.3797	9.26187	4.8206	1.85098	180.478	37.2043	26.4567	12.538	6.56709
5	0	2	0.111111	0	0	0	1	0	32	1.63625e+06	1.16206e+06	0.049352	-0.274021	1.00012	520.502	117.972	18.5843	7.17148	4.97607	1.99748	481.665	103.458	15.7889	17.1525	18.5119	25.1893	596.048	116.588	16.5177	7.94699	5.44877	3.94848	147.791	38.3824	17.6601	8.87847	6.64071	2.49081	121.506	30.3567	10.607	7.13739	5.53176	3.53962	161.341	36.8839	17.8224	10.8742	7.12916
5	0	2	0.148148	0	0	0	1	0	32	1.60028e+06	1.27856e+06	0.022817	-0.14382	0.9761	623.936	105.074	20.3018	8.5278	4.55417	1.62147	517.848	80.6856	15.2714	16.5303	16.8428	19.3614	734.201	114.215	21.919	10.2697	6.50239	4.47993	150.119	34.0993	16.7849	9.07313	5.2797	2.32807	121.382	25.2786	11.0715	6.95904	4.34249	2.09299	167.823	35.583	17.6541	10.224	5.32881
5	0	2	0.185185	0	0	0	1	0	32	1.84859e+06	1.68348e+06	0.280688	0.27418	1.01011	1106.29	126.742	29.7251	10.0928	4.66781	1.44805	918.922	101.446	21.2544	16.158	16.8065	20.4213	1257.33	134.181	34.6738	12.2547	5.96747	3.9894	292.942	42.8913	25.1247	11.8015	5.64517	2.00327	235.822	31.1078	17.9683	8.74508	4.55285	1.79182	326.645	45.2092	27.5958	12.3397	5.53749
5	0	2	0.222222	0	0	0	1	0	32	1.55623e+06	1.35386e+06	-0.002141	-0.042243	1.03379	428.732	86.7877	15.9031	5.95728	3.80173	1.38012	423.839	69.9267	13.6487	12.9367	19.3904	23.1044	458.805	84.7769	15.5219	6.76152	5.59089	4.19814	112.939	30.1296	12.3827	6.64827	4.8487	1.7697	99.2648	22.3453	8.26865	5.9813	3.75387	1.54833	120.039	28.5711	12.0098	7.21524	5.26458
5	0	2	0.259259	0	0	0	1	0	32	1.44203e+06	1.34772e+06	-0.10646	-0.036907	1.22246	621.907	100.095	18.1711	8.69514	4.59342	1.40593	523.871	77.519	12.2909	13.744	20.2073	20.951	735.502	109.967	24.645	12.0579	6.54517	4.76116	153.927	32.2631	15.6825	10.3324	5.69928	1.81622	123.609	24.3457	9.29215	6.82063	4.44084	1.53501	173.47	33.1552	20.4064	12.7502	5.29321
5	0	2	0.296296	0	0	0	1	0	32	1.34184e+06	1.17411e+06	-0.197712	-0.194285	0.954751	571.923	106.256	24.0522	9.81471	4.72276	1.58541	505.754	87.3097	18.9124	14.9429	20.7813	23.6818	670.104	106.778	27.4966	10.8834	7.11798	5.36867	141.373	36.6364	23.0832	12.1551	5.98759	1.9088	120.231	29.3759	17.1825	8.56668	4.47481	1.57361	154.776	37.1708	23.6225	12.6795	5.19859
5	0	2	0.333333	0	0	0	1	0	32	1.74884e+06	1.46863e+06	0.218881	0.113136	1.00672	608.708	100.401	23.5526	8.84979	6.11056	2.13192	493.292	82.6539	19.1117	16.5224	18.928	21.7372	686.537	107.584	24.9743	11.884	8.60111	5.24899	185.189	35.7557	21.2091	9.44057	6.9192	2.47981	142.909	26.3429	18.8936	8.13128	6.52267	2.97486	196.685	37.1176	30.0909	11.0997	7.41471
5	0	2	0.37037	0	0	0	1	0	32	1.50983e+06	1.04978e+06	-0.010646	-0.292219	1.00143	395.03	75.7983	21.7402	9.51321	5.82683	1.68913	367.434	60.2923	18.0183	16.356	17.8102	23.871	426.217	78.6142	21.7999	11.0659	8.56229	4.76909	123.359	31.9761	22.9894	9.90666	7.47336	2.11759	104.041	21.7906	18.8798	9.02616	5.68369	2.27986	131.554	34.051	27.8292	12.1533	7.77293
5	0	2	0.407407	0	0	0	1	0	32	1.77882e+06	1.44836e+06	0.267916	0.11938	1.04223	956.84	123.976	24.8718	9.83193	6.31708	3.5464	721.532	99.8727	22.649	14.4956	35.0181	27.7982	1179.39	143.565	24.8658	12.1145	10.4039	9.15664	267.843	39.8698	20.3509	11.6459	7.03868	4.1494	198.631	32.6364	15.7679	10.0725	14.0343	13.3086	312.488	42.9278	21.7795	13.3587	7.77129
5	0	2	0.444444	0	0	0	1	0	32	1.80685e+06	1.03163e+06	0.305265	-0.283086	0.96378	481.803	81.1866	21.332	9.19128	4.73756	1.62511	439.419	67.6821	17.2022	15.6119	17.0344	19.5101	546.159	83.3382	18.8186	10.8578	9.78958	6.3951	121.987	30.7065	19.3103	10.8129	5.86259	1.89665	103.889	23.5322	16.4823	9.13095	4.85793	1.87617	132.689	31.0052	27.1678	10.6186	6.22586
5	0	2	0.481481	0	0	0	1	0	32	1.44521e+06	1.5916e+06	-0.046709	0.289438	1.04875	440.925	97.3228	17.4517	8.85195	5.22253	1.73934	360.947	78.4816	13.0617	15.7873	13.6024	16.8278	524.214	99.2231	21.2085	13.3073	9.56705	6.3714	135.771	37.7104	18.2646	8.83199	6.36185	2.20131	101.943	27.6594	14.7209	7.26845	5.14194	1.96672	155.857	38.2668	27.2156	11.0654	6.40103
5	0	2	0.518519	0	0	0	1	0	32	1.25395e+06	1.07338e+06	-0.228494	-0.215251	1.03972	457.895	101.522	19.1203	7.77681	4.65452	1.69989	383.024	86.1431	15.3964	14.388	14.9549	18.0751	583.975	107.534	20.5064	11.8252	8.58534	5.77023	131.491	36.4311	18.194	8.65004	6.01273	2.005	99.6276	27.8522	13.3807	7.71306	5.18437	2.07697	161.276	35.8306	19.4772	10.4023	5.56679
5	0	2	0.555556	0	0	0	1	0	32	1.50024e+06	1.82578e+06	0.027305	0.550487	1.0498	757.869	126.805	22.1358	12.8644	8.50532	6.25446	711.041	114.683	16.9002	24.2678	30.8049	49.3812	825.16	130.865	27.6883	17.9526	14.4111	17.143	197.068	35.4206	23.0148	13.7728	9.54116	6.2708	175.941	31.7927	16.1695	16.1481	12.0936	16.3047	211.181	36.9922	33.355	16.7094	12.4558
5	0	2	0.592593	0	0	0	1	0	32	1.43756e+06	1.43417e+06	-0.026007	0.172906	0.99403	614.03	125.778	25.0317	10.4961	5.06372	1.88423	579.695	106.453	19.7003	16.8034	17.7964	18.6484	689.678	130.304	27.1949	12.5346	9.5685	5.31661	158.46	39.5781	22.7787	11.3004	6.22765	2.24223	139.027	33.1637	18.0492	9.45923	5.3159	2.32324	173.34	39.622	23.6002	13.11	5.71332
5	0	2	0.62963	0	0	0	1	0	32	1.70058e+06	1.22891e+06	0.246523	-0.018992	1.00183	533.864	95.9136	23.8102	9.07836	8.50747	5.91821	427.763	73.1634	19.0459	19.8112	33.3092	35.9376	649.929	104.552	27.851	13.7583	14.7356	16.8603	153.318	35.4634	25.7005	9.86622	9.39658	6.80233	112.97	26.4625	21.1434	11.6642	14.5479	22.1526	179.508	37.7605	37.3576	12.1414	12.0471
5	0	2	0.666667	0	0	0	1	0	32	2.05602e+06	1.06171e+06	0.61148	-0.172929	1.01853	346.38	80.677	15.0854	6.13303	4.79493	1.67247	276.581	62.5738	10.6382	12.5894	13.1792	17.5563	419.964	83.6188	16.2896	10.2839	8.75829	5.38258	121.277	33.9588	15.8285	5.98278	5.65615	2.21427	91.5157	24.2776	12.7946	5.6431	4.79354	2.24612	130.966	33.8035	23.4909	7.18525	6.61881
5	0	2	0.703704	0	0	0	1	0	32	852497	747487	-0.582679	-0.473065	0.956783	309.96	63.4369	17.2564	8.69076	4.85029	1.82809	243.035	43.6015	13.8405	13.4549	12.489	15.9734	378.512	63.9104	18.0041	13.2548	8.05817	5.56401	105.193	30.595	20.4184	8.26591	6.0358	2.3906	79.8658	20.3535	14.6883	6.56702	6.37624	2.58941	117.988	29.2883	30.7018	9.99297	7.31748
5	0	2	0.740741	0	0	0	1	0	32	862111	966057	-0.563518	-0.241352	0.985407	538.352	110.386	18.2447	8.85303	6.46262	1.85795	409.956	75.1066	12.8892	14.549	17.5782	16.7082	654.54	121.986	19.5644	11.2757	9.11931	5.59009	164.585	40.5008	17.2757	9.44115	7.88121	2.20802	116.85	26.5192	13.7504	8.41439	7.66637	2.5763	188.457	42.1396	24.2448	10.9138	7.05869
5	0	2	0.777778	0	0	0	1	0	32	1.27097e+06	1.32454e+06	-0.145036	0.129889	1.05143	438.958	94.377	22.7924	9.05784	5.81982	2.04396	359.213	73.978	18.3893	14.4379	14.9047	17.5802	561.606	98.4813	21.6495	11.3792	11.0371	5.9421	129.964	35.8728	22.8358	8.6417	6.96633	2.36604	95.5523	27.1776	18.1023	8.57386	6.88433	3.22901	153.438	34.9241	27.7707	10.7791	7.62993
5	0	2	0.814815	0	0	0	1	0	32	1.48098e+06	1.95259e+06	0.07436	0.771896	1.00181	611.462	89.4366	22.7853	12.5628	7.33972	5.05883	554.582	68.2082	19.1286	23.6966	29.5172	37.0179	753.95	100.241	23.6215	16.8947	12.6846	11.2506	165.14	38.8869	24.8302	12.8528	8.20987	5.0222	143.085	28.0444	19.9378	12.631	11.4175	11.8927	194.988	38.9781	27.7308	16.34	10.511
5	0	2	0.851852	0	0	0	1	0	32	946755	1.08272e+06	-0.450395	-0.08443	0.992092	348.665	69.2604	19.2412	8.17499	5.45734	1.85597	323.609	58.2754	14.3844	15.3116	13.9657	16.6441	377.155	69.7161	17.4075	11.1655	9.20538	5.41326	114.975	29.5825	21.4466	8.081	6.48516	2.31443	94.5249	21.1561	14.7047	7.5114	5.74729	2.4765	116.493	29.2069	27.4685	9.56974	7.0445
5	0	2	0.888889	0	0	0	1	0	32	1.0493e+06	805675	-0.338294	-0.348395	1.02662	236.704	58.5049	16.3176	7.3026	4.97714	1.72895	208.224	43.9389	11.2179	12.7857	15.9715	17.7308	282.885	61.3203	16.9073	11.2491	9.84734	6.24226	76.474	28.8386	19.3929	7.52307	6.30626	2.26018	60.6011	20.1599	14.0777	7.43943	5.82357	2.3585	83.0614	27.4674	24.6828	9.49744	6.69698
5	0	2	0.925926	0	0	0	1	0	32	2.06963e+06	1.55201e+06	0.691619	0.410904	1.0726	546.503	88.7113	19.2725	11.4472	5.72659	2.1426	452.798	71.4404	18.6217	14.7394	15.0377	15.4925	691.215	96.6139	24.0396	13.5753	10.1699	6.76987	147.418	36.8351	17.1577	12.46	7.17637	2.62126	109.689	27.2417	14.6555	10.0088	7.17018	3.30308	175.443	36.0373	22.9949	14.1884	7.72308
5	0	2	0.962963	0	0	0	1	0	32	1.67946e+06	1.02493e+06	0.310956	-0.102826	1.08127	579.514	113.243	25.8998	9.86155	5.22453	1.57248	497.446	83.2974	17.9713	12.8639	13.8044	15.9718	688.356	119.559	25.6314	12.9117	9.62312	5.58353	167.246	43.8855	20.1815	10.9252	6.69968	1.94451	136.336	31.5385	15.5109	9.59008	5.31915	1.75775	187.197	43.4417	25.1381	13.8414	6.9996
5	0	2	1	0	0	0	1	0	32	1.19381e+06	1.07135e+06	-0.165436	-0.041781	0.968033	324.565	75.7958	17.0534	9.12105	4.94553	1.77069	238.95	55.0404	12.2683	15.4756	11.6297	17.335	447.43	85.0486	17.0258	12.4192	9.70982	6.27084	110.012	31.867	16.8935	8.84139	5.97535	1.9962	77.0288	23.5674	13.811	7.34287	4.49081	1.68134	127.507	31.5568	19.8725	11.6552	6.79666
5	1	0	0.037037	1	1	0	0	0	32	1.31577e+06	1.33469e+06	-0.248866	-0.27122	1.11808	394.906	90.5957	19.7258	8.67005	4.8693	1.73562	317.069	69.6501	15.5668	8.03375	5.31896	2.60447	569.194	115.266	19.7313	8.21873	4.99191	2.61385	117.79	31.5534	20.0492	9.94578	6.62433	2.68453	103.078	26.7206	15.0691	8.48506	5.67951	2.67301	116.441	24.4705	22.5757	9.98712	7.05715
5	1	0	0.074074	1	1	0	0	0	32	1.51632e+06	1.44333e+06	-0.043863	-0.158587	1.05673	577.5	86.2619	31.8445	13.5014	6.02116	1.59088	435.964	64.7676	22.61	12.2947	6.97003	3.79508	845.162	116.043	27.9097	11.6583	6.15556	2.90349	150.141	31.4156	29.6667	14.5474	8.1321	2.40021	128.833	25.0856	23.5305	11.9573	6.50064	2.26264	152.058	29.5913	28.4723	13.4136	6.9902
5	1	0	0.111111	1	1	0	0	0	32	1.36861e+06	2.03446e+06	-0.187037	0.436052	1.04068	568.627	116.447	29.7889	9.39427	5.41221	1.32651	451.13	94.9425	20.9758	8.8706	6.72829	3.97712	817.301	161.952	30.4755	9.459	5.12388	2.26728	144.234	39.6278	24.6941	10.8677	7.85289	2.2911	133.614	33.1818	17.6134	10.3042	6.52585	1.78319	145.586	35.5462	27.9557	12.095	6.36706
5	1	0	0.148148	1	1	0	0	0	32	1.24202e+06	1.45293e+06	-0.308873	-0.143004	1.12526	420.63	112.439	24.7425	11.9048	5.48576	1.61986	326.007	81.6145	18.8752	10.8271	8.45008	5.48463	605.323	144.985	23.3888	10.9038	5.97988	2.89156	123.528	44.9713	23.8248	11.639	7.7534	2.2098	106.202	33.2277	19.0112	10.5846	6.90381	2.36099	124.998	38.9928	21.213	11.8655	6.25032
5	1	0	0.185185	1	1	0	0	0	32	826191	1.23975e+06	-0.720223	-0.352349	1.07854	354.767	85.6344	25.6018	11.2764	4.29778	1.27044	296.206	64.1972	20.3797	11.6278	8.48513	6.49176	504.555	105.99	24.4028	11.0865	5.4612	2.56378	93.9076	37.0947	27.3096	13.8579	5.65732	1.97322	87.9433	30.15	20.7293	13.1678	6.45365	3.22125	87.2262	28.8355	23.3133	12.1884	4.79633
5	1	0	0.222222	1	1	0	0	0	32	1.74514e+06	1.46065e+06	0.203098	-0.12706	0.978384	733.625	87.5663	30.8774	14.4034	6.50511	1.40765	546.208	63.4194	22.6078	13.3786	11.1172	6.94354	1093.88	126.798	29.9804	13.6226	6.93453	3.02474	168.059	38.0835	33.7905	15.8405	9.49014	2.06735	149.157	27.1124	23.5747	13.0359	7.37147	2.29012	164.703	33.7128	31.0137	16.0225	7.12294
5	1	0	0.259259	1	1	0	0	0	32	1.44162e+06	1.30061e+06	-0.095805	-0.28396	0.999109	391.238	94.1123	18.8222	7.52585	5.14593	1.41471	257.846	57.8857	14.2657	8.79672	8.31305	6.23432	659.601	151.22	22.9477	9.12989	5.4697	2.7441	109.789	35.1262	19.2443	8.07475	7.23962	2.20281	86.5097	22.9352	14.4793	7.81957	6.37784	2.86892	123.069	33.513	23.0339	9.64151	6.29552
5	1	0	0.296296	1	1	0	0	0	32	1.81749e+06	1.6011e+06	0.284963	0.018244	1.15574	520.676	101.632	32.0117	8.75797	4.97714	1.59881	377.74	73.5222	26.5728	11.4942	10.0112	8.15262	832.449	158.174	30.4137	9.17652	6.10604	3.26321	133.293	32.0012	29.1733	9.19556	7.27071	2.32014	111.309	26.1507	24.6344	8.62508	7.50989	2.87791	146.993	31.621	27.4414	10.1272	6.3937
5	1	0	0.333333	1	1	0	0	0	32	1.85398e+06	1.61659e+06	0.325606	0.039181	0.953863	531.339	107.212	25.2568	5.65268	4.72971	1.28595	404.904	79.4384	19.5149	7.56691	7.21943	6.4301	774.334	151.445	25.4949	8.02669	6.06056	3.25692	146.845	35.284	27.0008	5.37801	6.31963	1.99394	128.484	28.6184	18.0263	5.13986	5.44901	2.48767	145.075	28.8299	28.9948	5.18887	5.87229
5	1	0	0.37037	1	1	0	0	0	32	2.01618e+06	2.44426e+06	0.492485	0.869728	1.00012	618.419	114.018	22.2448	9.89262	5.88968	2.14075	457.495	86.0261	19.4613	12.0905	10.9265	10.1327	956.593	171.662	24.5287	10.956	7.03332	4.40953	152.135	33.5179	20.617	10.8738	6.88216	2.721	134.42	28.886	16.8132	10.0421	7.27748	3.70098	156.326	31.1671	22.8752	10.7421	5.74045
5	1	0	0.407407	1	1	0	0	0	32	1.48691e+06	1.57548e+06	-0.032267	0.004566	0.973585	304.995	77.7177	16.0773	10.1941	5.02171	1.40685	258.379	58.3712	16.8	11.2343	7.95275	6.7065	460.7	98.7804	17.1747	10.7117	6.3867	3.22971	79.5887	33.9021	19.1851	10.9045	5.52396	1.89293	77.0781	26.9319	20.1939	9.49805	5.73408	1.98903	73.6262	26.554	23.2509	9.14786	5.4324
5	1	0	0.444444	1	1	0	0	0	32	1.37692e+06	1.39313e+06	-0.137627	-0.174723	1.00159	565.589	109.566	13.9201	6.82288	5.20443	1.36138	433.73	87.6317	12.2415	8.24006	8.88098	6.38313	832.965	147.332	15.9265	8.22083	6.06785	3.43246	150.593	33.5263	13.5436	7.86315	7.11498	1.97774	134.113	29.3031	11.1557	7.60572	6.46025	2.1367	145.224	26.8459	15.2117	8.468	5.63893
5	1	0	0.481481	1	1	0	0	0	32	1.72793e+06	1.75115e+06	0.218008	0.186414	1.02419	421.969	98.1416	16.6368	8.34335	5.20305	1.67922	310.707	70.3614	12.7294	10.0477	8.56119	8.34052	657.356	143.555	19.774	10.3192	6.7021	4.19896	109.438	35.0442	17.3902	8.86175	7.10105	2.39693	96.4031	26.9823	12.0993	8.00929	7.36805	3.18769	109.397	29.6132	19.2666	10.7953	6.29473
5	1	0	0.518519	1	1	0	0	0	32	1.3122e+06	1.2306e+06	-0.193129	-0.330861	1.03137	443.326	97.8367	19.5006	8.77556	5.71073	1.6045	360.108	80.0368	17.3619	10.8138	8.84157	7.31341	655.712	126.306	19.3562	10.5045	7.17995	3.74514	115.6	36.9994	16.7358	9.14652	7.12332	2.19807	108.72	29.1286	13.1222	9.65386	7.48085	3.2633	119.664	28.3446	15.8181	9.72465	6.21063
5	1	0	0.555556	1	1	0	0	0	32	943375	1.19411e+06	-0.55746	-0.363618	0.993821	492.307	112.5	22.1062	8.28114	5.24623	1.725	363.204	83.3775	16.3885	9.03864	9.29803	7.46139	764.887	152.83	23.9452	9.84706	7.59577	4.03521	125.456	39.2336	19.5036	9.00648	6.07627	2.32247	101.596	30.3909	14.5358	8.03971	5.9551	2.95457	124.936	31.0701	20.8298	9.73474	6.10729
5	1	0	0.592593	1	1	0	0	0	32	1.31253e+06	1.4076e+06	-0.183671	-0.147066	1.0221	726.586	149.019	30.6578	11.0221	5.02022	1.69478	534.303	110.871	24.3825	12.8494	13.4242	11.7212	1103.43	205.447	30.5699	10.9253	7.30892	4.12379	188.892	46.7769	31.9859	14.1763	7.25349	2.21669	157.221	37.8917	25.7094	13.5251	7.11006	2.86609	187.777	38.9243	29.2223	12.6659	5.45792
5	1	0	0.62963	1	1	0	0	0	32	1.83556e+06	1.51201e+06	0.343851	-0.0389	0.982485	514.166	104.555	19.3641	9.14635	5.16818	1.54411	390.47	77.0246	13.3331	11.3298	11.2908	9.49887	753.462	145.044	21.5454	9.95498	7.05466	3.89084	136.963	36.6469	19.0869	10.1969	7.25057	2.19748	123.18	28.4239	11.1031	10.003	6.25578	2.3879	129.526	31.0618	22.4946	10.7078	5.9144
5	1	0	0.666667	1	1	0	0	0	32	1.86923e+06	1.86619e+06	0.382283	0.317722	1.06987	743.268	130.203	26.8406	12.5627	7.21178	2.58245	584.621	99.9516	19.6586	15.3334	13.4041	12.498	1098.56	180.332	27.3869	13.9428	9.94421	5.7725	173.432	45.2013	27.8131	14.4101	10.4926	3.54483	165.893	35.3287	20.1727	12.3433	8.80304	4.6875	166.384	43.0121	32.6076	17.7459	12.9555
5	1	0	0.703704	1	1	0	0	0	32	1.3014e+06	1.19969e+06	-0.181082	-0.344892	1.01873	589.945	136.101	18.1654	8.03438	5.48172	1.38979	418.546	102.96	15.9571	10.6608	10.9957	10.7797	950.093	195.844	17.7796	9.05325	6.67586	3.575	147.056	41.6107	17.9402	9.77533	7.78052	1.96237	119.09	33.484	12.6824	8.64549	5.88636	2.22626	160.614	35.4652	15.7193	11.075	6.32676
5	1	0	0.740741	1	1	0	0	0	32	1.40046e+06	1.56175e+06	-0.077469	0.020649	1.00524	890.925	151.359	30.7363	11.7357	6.01716	1.43306	581.942	110.74	25.2148	13.4431	11.212	9.78694	1481.84	223.994	31.871	12.243	7.93913	3.96176	218.3	44.6551	25.1	11.8999	7.46327	2.1264	168.818	36.8655	19.5312	9.7866	6.27681	2.13398	242.79	40.1457	22.9283	12.5375	5.64838
5	1	0	0.777778	1	1	0	0	0	32	1.65929e+06	1.5157e+06	0.190319	-0.044215	3.13379	662.691	123.903	18.5142	6.87451	4.89959	1.45886	512.816	95.8502	14.7477	9.16496	10.3098	9.36645	949.846	171.034	22.164	8.78919	8.60542	3.97016	188.122	38.336	17.5566	6.464	5.93204	1.994	161.635	30.8259	10.9364	5.79255	5.13863	1.86527	178.172	32.2177	21.5367	6.7032	5.93241
5	1	0	0.814815	1	1	0	0	0	32	1.59524e+06	1.71107e+06	0.129029	0.163692	2.25121	647.339	130.757	20.4494	10.6407	5.20975	1.69885	531.197	106.441	16.5165	11.8285	12.7363	10.9689	980.825	176.661	23.3539	11.4448	9.17125	4.32246	152.762	39.5817	19.6586	11.8751	7.60439	2.13273	141.732	35.2794	14.3796	9.23752	6.44176	2.15973	154.694	34.2058	21.9849	12.3804	6.65807
5	1	0	0.851852	1	1	0	0	0	32	1.40184e+06	1.59571e+06	-0.062195	0.063778	1.09013	621.799	125.757	21.2535	7.92228	4.1456	1.47172	461.892	94.8783	17.1794	11.5851	10.8978	9.67421	918.474	173.566	22.3608	8.29602	7.51423	3.76253	166.38	38.1715	19.7763	7.54255	4.99339	1.88779	143.773	31.8231	15.342	6.63028	4.36224	1.74715	159.78	32.8438	21.3505	6.95492	4.74914
5	1	0	0.888889	1	1	0	0	0	32	1.55957e+06	1.64965e+06	0.099923	0.122021	0.998802	662.547	103.421	20.0419	9.04091	5.08891	2.50007	448.293	73.9109	17.6415	14.1671	13.3836	12.1512	1120.92	148.683	24.271	10.473	8.43376	6.33299	168.857	36.6495	18.5299	9.39123	5.99158	2.95438	135.641	28.7324	14.2911	8.74302	6.06302	3.27682	186.567	31.0638	22.4716	9.40103	7.09126
5	1	0	0.925926	1	1	0	0	0	32	1.14142e+06	1.40355e+06	-0.313664	-0.120641	0.99007	753.182	123.823	19.3339	9.07982	5.33344	1.3694	536.293	94.7347	14.1648	11.497	14.5899	11.1958	1162.15	174.359	21.5779	9.35258	7.87219	3.82957	179.008	37.7131	16.6396	10.5839	7.63611	1.95145	152.502	32.0371	11.484	9.36429	5.96378	1.7227	185.893	31.6572	17.0192	10.9852	6.63064
5	1	0	0.962963	1	1	0	0	0	32	1.46817e+06	1.45363e+06	0.017603	-0.066939	0.963792	656.923	143.256	19.8714	10.1223	5.1844	1.53934	480.778	104.898	18.9313	14.2527	13.8374	13.2541	1023.45	191.086	20.5763	11.2421	7.8038	3.96621	166.112	47.5257	25.4586	10.7901	6.35179	1.84183	144.327	39.315	20.7724	8.27414	5.27104	1.64134	172.831	42.1692	25.5887	11.5725	6.10547
5	1	0	1	1	1	0	0	0	32	1.38615e+06	1.5956e+06	-0.059734	0.077846	1.01542	492.569	116.287	14.3954	5.09617	4.2438	1.31173	382.169	84.9205	11.3872	9.10991	12.197	11.1312	787.129	153.88	17.0871	7.04892	6.67059	4.09225	132.526	40.5466	11.6669	5.35842	5.0306	1.62654	117.462	33.0906	9.44814	4.78133	4.49554	1.42862	139.02	31.7177	12.2829	5.09924	4.59829
5	1	1	0.037037	1	0	1	0	0	32	1.44483e+06	1.39257e+06	-0.114327	-0.166831	2.70006	562.573	106.89	19.753	5.99297	4.51732	1.50411	425.964	80.8841	14.2723	9.84923	11.3954	11.4815	805.056	150.094	20.4884	6.52772	6.91077	3.51853	141.789	32.7738	21.1651	6.0194	5.27242	2.09465	121.928	27.7044	15.7401	7.05665	6.85639	4.28327	143.27	27.268	26.2282	5.56772	6.2592
5	1	1	0.074074	1	0	1	0	0	32	2.28621e+06	2.06747e+06	0.719686	0.514562	1.65501	1315.56	210.298	37.6859	16.7341	7.00658	3.42514	1188	181.669	31.1772	20.2528	12.442	12.2448	1735.62	288.996	41.6134	13.3297	8.70925	7.11248	310.97	51.1856	35.4599	18.6699	9.99446	4.44041	312.196	47.6508	27.9095	18.4938	8.29511	5.4784	301.611	46.3971	32.6567	15.8811	9.30275
5	1	1	0.111111	1	0	1	0	0	32	1.67038e+06	1.61513e+06	0.098657	0.057777	1.66068	665.039	127.834	25.8198	9.66932	4.90512	1.22999	526.808	103.058	18.0329	10.0776	9.71298	7.10006	921.18	168.946	27.6033	10.3851	6.81235	3.20044	159.924	41.4702	29.1282	10.7724	7.22405	1.75452	147.044	33.2545	17.2954	9.00105	5.35239	1.64276	153.277	36.1148	31.6912	10.9256	6.3932
5	1	1	0.148148	1	0	1	0	0	32	1.38737e+06	1.30109e+06	-0.186847	-0.274378	2.9788	1030.05	160.297	29.2692	11.3777	4.87693	1.57721	791.411	127.249	23.2775	12.5338	10.9358	9.63816	1465.77	208.015	30.1249	11.4287	8.33611	4.73376	234.931	53.4244	29.9268	15.1239	6.20642	2.0117	206.687	48.4995	25.202	12.2175	5.53286	1.85782	232.148	42.6177	29.8192	15.243	5.88016
5	1	1	0.185185	1	0	1	0	0	32	1.31051e+06	1.37863e+06	-0.271183	-0.189767	1.87895	675.871	148.627	24.8438	9.35239	5.38739	1.23602	515.532	109.586	20.7944	11.6824	9.22876	8.53012	1002.03	190.826	28.9179	9.54581	10.2154	4.13291	160.654	46.749	25.9288	10.6802	6.68287	1.77164	143.751	36.8791	20.6279	10.0222	5.69409	1.88178	163.208	39.5603	29.9803	10.9952	6.51215
5	1	1	0.222222	1	0	1	0	0	32	1.27343e+06	1.24076e+06	-0.31273	-0.335768	2.239	641.962	125.304	31.137	11.2975	5.98992	1.47441	506.732	91.7576	25.4689	13.5507	12.4642	10.0512	912.623	167.927	33.3186	12.1539	11.1483	4.99862	167.881	41.9582	35.5698	12.4577	8.16524	1.98503	150.813	34.7895	27.3615	10.901	7.03169	1.75077	167.416	37.3	39.1875	13.0646	6.94939
5	1	1	0.259259	1	0	1	0	0	32	1.43088e+06	1.39388e+06	-0.160968	-0.184643	2.00922	728.311	124.247	28.5167	12.2096	5.86874	1.38626	541.934	89.1465	21.3876	13.4933	11.782	10.0882	1059.99	181.428	31.4166	15.0607	11.5144	6.40651	189.157	39.0541	31.0991	13.5269	7.26284	1.99681	161.906	31.9491	23.8289	10.9248	6.31545	1.71804	180.391	35.7523	31.8421	14.3509	6.24735
5	1	1	0.296296	1	0	1	0	0	32	1.42185e+06	1.69795e+06	-0.175388	0.115993	1.91757	961.69	121.398	36.665	12.4108	7.75977	2.03775	698.672	92.3212	27.7015	15.8648	17.4886	14.7748	1437.46	167.489	40.8376	13.854	14.2771	8.25112	242.943	40.7259	30.2864	12.5335	8.52578	2.26228	198.278	34.4489	21.3166	11.3585	8.09523	2.39191	253.678	34.7413	31.3555	13.0648	6.40458
5	1	1	0.333333	1	0	1	0	0	32	1.3979e+06	1.62401e+06	-0.19748	0.001922	5.35001	879.05	119.702	31.1794	14.8093	6.62104	1.70563	618.008	88.0302	25.415	18.3476	15.8051	14.5916	1402.5	158.591	32.7325	15.7947	13.1704	8.68286	209.709	41.8262	35.7355	15.7392	8.66892	2.07731	161.666	33.3153	24.0043	12.8082	6.67889	1.94234	239.416	37.5528	33.9219	15.6464	5.8608
5	1	1	0.37037	1	0	1	0	0	32	1.22152e+06	1.39631e+06	-0.386995	-0.190105	1.50387	876.675	90.4092	25.2277	12.7894	6.81942	2.26132	663.767	62.8466	19.2689	16.9499	23.3304	23.0396	1303.44	128.321	29.026	15.6103	13.8115	9.61291	187.805	36.1511	27.2468	16.2218	8.45403	2.37956	170.398	28.4155	19.626	12.8564	7.60239	2.65937	196.322	30.4546	27.7623	15.2818	6.562
5	1	1	0.407407	1	0	1	0	0	32	1.23688e+06	1.4968e+06	-0.376838	-0.094025	1.50633	1048.32	69.384	42.1295	20.5871	8.4176	2.62719	806.096	43.4264	34.5295	25.2237	30.3151	29.4216	1461.42	97.2702	35.9461	21.2287	15.905	10.0813	244.905	35.3415	49.9599	24.7427	10.9033	2.23019	222.313	26.2846	35.3588	20.9253	8.80876	3.08594	224.482	33.5744	40.2873	21.638	7.15866
5	1	1	0.444444	1	0	1	0	0	32	1.76488e+06	1.50871e+06	0.145878	-0.086137	1.47083	611.109	103.565	21.9498	8.14897	5.69106	1.98517	399.628	70.59	15.3371	17.6193	15.483	18.7767	977.626	149.7	23.4912	11.8508	12.0751	10.9106	137.986	35.3765	25.7564	8.5856	7.35796	2.01287	104.898	27.3413	17.5288	6.968	6.50438	2.28855	151.049	29.7973	30.5031	9.48049	6.37199
5	1	1	0.481481	1	0	1	0	0	32	2.02923e+06	1.82003e+06	0.405478	0.218447	1.69635	1054.96	125.423	26.7521	10.8482	7.02542	2.55921	797.878	91.8549	20.9946	18.0486	21.1122	23.6448	1507.96	165.74	29.7468	15.0503	14.2879	11.1753	235.303	44.7422	26.4558	12.9868	8.14088	2.63498	200.151	36.3727	19.4049	12.6574	7.99093	4.33576	237.751	37.9664	28.0124	13.7788	7.16947
5	1	1	0.518519	1	0	1	0	0	32	1.78957e+06	1.56077e+06	0.160772	-0.046034	1.77691	617.887	108.708	20.2865	7.4399	5.23994	1.91305	509.703	87.1719	18.2158	14.7587	15.9183	18.9705	812.407	140.109	21.7228	12.1093	15.4242	11.3383	160.728	38.2039	20.7003	9.10013	7.05219	2.11927	150.241	31.8614	15.6705	8.99001	6.3862	3.27446	145.52	32.7667	23.7844	10.0849	6.62284
5	1	1	0.555556	1	0	1	0	0	32	1.18277e+06	1.29612e+06	-0.446574	-0.33863	4.03913	563.58	104.145	26.7325	10.1068	5.09899	1.80103	406.073	73.3499	18.7878	14.6447	12.1964	13.6212	861.028	146.656	29.8906	16.4193	14.7597	12.2287	158.598	35.292	26.9412	11.8154	6.907	2.1287	126.999	29.4938	17.7133	10.5131	6.44247	1.9376	171.786	31.2363	30.6249	11.0503	6.59353
5	1	1	0.592593	1	0	1	0	0	32	958743	1.30426e+06	-0.676609	-0.330822	3.64985	455.027	96.4539	20.5807	12.2298	6.73236	1.87873	371.897	71.0411	17.4584	16.2115	15.0616	15.9289	661.129	132.596	20.2083	15.1159	17.4984	12.2617	112.064	34.2678	22.2041	14.5539	8.89817	2.09175	104.087	29.2182	16.9509	12.2225	7.05291	2.01264	107.055	28.9833	24.355	14.0789	6.84208
5	1	1	0.62963	1	0	1	0	0	32	1.80081e+06	1.80292e+06	0.157612	0.176762	2.37134	723.297	112.815	30.6878	10.4819	6.95252	2.84775	482.028	73.9338	23.6722	19.51	21.617	25.6591	1199.14	156.469	33.3395	14.4742	20.2332	13.1948	184.38	41.4275	31.4965	13.2139	8.49533	2.79677	137.823	31.2757	22.1193	13.2236	8.61195	6.49378	218.825	34.9733	30.7443	12.308	7.16579
5	1	1	0.666667	1	0	1	0	0	32	1.40412e+06	1.20464e+06	-0.245417	-0.420181	1.82192	646.429	135.381	17.4212	10.9446	6.34278	1.88102	451.665	86.6828	13.9512	15.4701	18.0772	17.8947	966.842	186.19	20.6701	16.6986	17.4928	12.852	169.252	45.3786	17.8057	10.8926	7.64077	2.08185	137.954	35.7451	12.4119	11.6434	6.9793	2.54374	171.33	37.7308	20.3384	11.2354	6.12493
5	1	1	0.703704	1	0	1	0	0	32	1.86975e+06	1.78807e+06	0.21463	0.160736	1.64226	864.816	156.561	34.6565	15.5096	7.27201	2.77312	628.835	106.681	27.3893	20.0517	19.3587	20.0306	1263.69	212.456	36.3552	20.3101	16.2058	13.5203	224.723	50.7668	32.2152	15.1041	9.0864	3.23137	193.239	40.6973	26.7027	14.5239	8.13713	4.62327	226.63	46.7057	31.4059	18.3637	11.1681
5	1	1	0.740741	1	0	1	0	0	32	1.64486e+06	1.60139e+06	-0.010449	-0.055704	4.07885	854.637	143.639	29.1602	13.467	6.69298	2.15669	600.007	103.379	23.8384	20.5126	19.2499	18.342	1328.39	198.617	33.8266	17.9115	14.483	13.236	234.269	47.5732	27.9022	13.7958	8.1454	2.49424	186.735	37.9559	23.7143	13.4352	6.52544	2.98916	248.28	42.4873	26.9441	14.3752	5.90875
5	1	1	0.777778	1	0	1	0	0	32	2.39964e+06	2.30555e+06	0.733896	0.670456	1.54554	1432.98	152.99	35.0746	14.8257	7.15232	4.23184	914.096	112.779	36.6068	19.2116	18.0587	26.8478	2230.8	220.175	38.0812	18.5169	10.4559	11.5529	379.643	51.2115	32.2021	15.0408	8.62355	4.23772	282.741	42.2142	29.4154	13.6522	8.03824	6.4843	430.305	50.7948	32.6211	17.0436	8.91206
5	1	1	0.814815	1	0	1	0	0	32	1.43676e+06	1.15408e+06	-0.232666	-0.493142	2.28809	474.776	126.805	20.8763	5.76342	4.47276	1.58217	389.288	96.2885	16.1729	9.00664	10.5624	11.1696	641.791	160.184	23.3214	8.62487	7.01397	4.15227	122.848	41.5558	19.7576	5.41989	4.87928	1.80201	111.221	33.2889	13.3535	4.78244	4.40839	1.67805	121.598	34.3693	22.5502	6.28207	4.96463
5	1	1	0.851852	1	0	1	0	0	32	1.21456e+06	1.24531e+06	-0.461675	-0.398192	1.51049	630.005	139.331	20.6125	8.68716	5.16356	1.57734	468.322	95.6066	15.2467	10.6865	12.0089	10.6845	928.494	174.244	23.4961	9.82102	8.36147	4.91791	154.508	45.6906	20.0038	9.31767	6.53207	1.84603	132.327	34.7674	14.3504	8.15026	5.28083	1.42516	163.087	37.2889	23.2778	9.12792	5.47107
5	1	1	0.888889	1	0	1	0	0	32	1.45113e+06	1.34617e+06	-0.228517	-0.310806	2.38311	778.213	132.958	38.3988	13.977	6.62465	2.02142	612.402	91.4557	28.3344	17.9157	18.4417	12.4638	1104.65	178.719	39.7514	14.9269	9.58214	5.41505	196.073	46.5066	38.3604	14.0547	7.73543	1.97541	175.585	35.7893	28.4312	13.6799	6.1552	1.69204	194.328	41.516	35.0551	14.2287	5.74692
5	1	1	0.925926	1	0	1	0	0	32	1.67792e+06	1.79595e+06	-0.009439	0.147227	1.16891	1022.43	135.657	32.6376	12.8226	7.36361	2.35307	809.85	103.802	22.1525	17.3281	22.0199	19.4262	1418.75	180.648	31.3747	13.112	10.904	6.19115	246.256	46.0134	32.3439	14.2268	8.83832	2.39518	228.821	39.5106	20.2106	11.6111	6.68807	2.72149	237.597	42.0623	31.7459	14.2311	6.85276
5	1	1	0.962963	1	0	1	0	0	32	1.64737e+06	1.63146e+06	-0.04509	-0.022197	1.22181	1125.63	144.784	28.9313	19.2516	8.03172	2.61532	830.407	102.823	24.9927	25.1249	26.4927	24.5132	1554.7	189.34	36.014	17.0711	9.82152	6.17927	305.903	45.8621	30.8386	19.643	8.45544	2.39435	267.554	38.1684	26.7364	16.5168	8.31791	3.1714	283.478	38.4194	32.5204	17.5077	5.79214
5	1	1	1	1	0	1	0	0	32	2.55124e+06	2.5349e+06	0.855219	0.868518	2.02268	1338.2	178.828	29.4034	12.1559	8.3225	6.68899	1176.03	144.304	25.539	16.6743	24.3147	32.7295	1780.37	250.237	35.8961	13.026	13.9156	11.7652	343.4	45.2047	28.0948	13.5489	9.49119	6.27375	348.783	41.1103	19.0356	11.4303	9.39184	9.55728	345.478	47.6631	32.1681	18.5817	22.5656
5	1	2	0.037037	1	0	0	1	0	32	1.2428e+06	1.31879e+06	-0.360103	-0.175389	0.896952	597.939	156.076	24.2653	8.31375	4.67924	1.30166	451.383	118.444	17.8957	7.72783	5.01449	2.61637	900.031	214.28	28.8791	8.24077	4.46424	1.77837	137.394	44.612	22.6994	9.93886	6.54786	1.92995	120.928	37.8026	14.4212	7.70786	6.00134	2.3835	148.92	39.8955	25.3914	9.19235	5.71577
5	1	2	0.074074	1	0	0	1	0	32	1.52202e+06	1.46062e+06	-0.086234	-0.041787	0.935702	885.654	127.342	26.6985	12.3815	6.12861	1.34252	622.813	96.3815	22.937	11.0787	6.27582	3.51291	1375.94	172.892	27.7467	11.6581	5.40341	1.896	225.227	43.0294	23.673	11.6751	9.97144	2.23723	181.273	34.9739	18.8871	11.7338	7.21221	2.19494	248.665	36.9777	25.0622	12.0718	7.2632
5	1	2	0.111111	1	0	0	1	0	32	1.24943e+06	1.40018e+06	-0.364291	-0.109908	0.922793	708.174	136.907	31.0243	11.896	4.85057	1.15293	492.583	96.8552	21.482	8.70501	4.72284	1.64789	1084.87	201.004	33.1043	11.5638	4.80323	1.48201	178.195	43.7056	26.9424	14.2956	6.93207	2.15888	142.306	33.9114	21.5134	11.5543	5.689	2.23691	195.142	41.3074	29.4775	13.7183	5.06769
5	1	2	0.148148	1	0	0	1	0	32	1.50861e+06	1.19279e+06	-0.110441	-0.325624	0.971822	409.789	110.573	21.2758	6.88422	4.73244	1.02516	296.016	75.7307	14.5466	5.51775	4.51647	1.28265	657.939	148.776	22.9863	7.02235	4.66466	1.3297	118.987	41.207	25.9243	7.34233	6.33385	1.85489	99.6346	29.6805	19.1097	6.48163	5.50165	1.68848	131.853	34.1338	30.7546	7.34151	6.02661
5	1	2	0.185185	1	0	0	1	0	32	1.42288e+06	1.26245e+06	-0.201605	-0.263808	0.974952	525.131	108.698	20.3728	9.79941	4.73193	1.00893	422.114	86.3379	15.4572	8.22258	5.25346	2.45548	771.96	135.894	22.1558	9.7763	4.6088	1.50873	123.166	37.8524	22.0209	11.7355	6.72257	1.73535	113.308	31.9575	17.0465	8.63289	5.56461	1.76992	129.523	28.8875	26.755	12.365	6.32231
5	1	2	0.222222	1	0	0	1	0	32	1.47048e+06	1.35071e+06	-0.159417	-0.183467	0.985041	406.035	86.575	19.8277	7.80513	5.34568	1.13268	331.508	65.1686	14.7417	7.56651	5.59633	3.15864	598.142	119.099	20.8611	7.6052	5.01064	1.66928	110.595	38.1578	18.2285	8.55645	7.11043	1.71019	99.7924	28.8432	16.2014	6.78548	5.21766	1.61898	109.599	31.1445	20.1314	9.36728	5.60567
5	1	2	0.259259	1	0	0	1	0	32	1.98051e+06	1.70251e+06	0.345086	0.16095	0.943251	961.31	122.85	31.9976	13.0507	5.01575	1.49142	672.694	84.6507	27.3014	12.6477	7.62355	5.9256	1568.99	174.175	34.5059	11.075	5.34337	2.24324	221.913	44.4269	32.1446	15.2307	7.55099	2.17568	183.028	32.9355	26.5498	13.1406	6.1505	2.40339	264.059	40.7313	31.753	12.441	6.19711
5	1	2	0.296296	1	0	0	1	0	32	1.67683e+06	1.38988e+06	0.035992	-0.159612	0.95458	698.093	144.709	20.5312	9.17777	5.51291	1.37905	573.951	110.751	17.0048	9.53708	7.39739	6.19829	1060.03	191.033	24.2409	9.76173	5.61077	2.4163	157.723	48.8939	23.3489	10.2554	6.8378	2.08715	151.267	40.8156	19.1217	9.04954	5.5147	2.00868	169.541	39.9199	29.1495	10.5513	5.4964
5	1	2	0.333333	1	0	0	1	0	32	1.6553e+06	1.44603e+06	0.008899	-0.110625	0.891681	492.028	130.71	19.0253	6.23745	5.12688	1.23825	375.723	91.9167	14.5661	6.44115	6.08292	4.40483	737.82	163.43	19.8314	6.8413	5.61232	2.11953	128.185	50.8449	20.7795	6.78703	7.33282	2.14127	111.54	38.3428	17.4678	5.39499	5.11694	1.49491	130.183	39.4955	26.6814	6.38013	7.10017
5	1	2	0.37037	1	0	0	1	0	32	1.43839e+06	1.51711e+06	-0.213324	-0.048006	0.953595	634.391	114.491	18.9871	9.95099	5.34962	1.1689	502.013	96.4273	14.7439	8.40654	6.61223	4.30611	885.603	152.062	20.3899	9.8115	5.75762	2.22602	170.583	37.0451	19.1432	9.89424	7.49617	1.89618	154.769	32.6176	14.5388	8.68109	5.50213	1.3358	155.015	30.4478	23.7163	10.7458	5.33308
5	1	2	0.407407	1	0	0	1	0	32	1.6447e+06	1.42459e+06	-0.012477	-0.14821	0.941333	521.312	105.997	32.4903	13.1939	5.39148	1.26617	362.104	77.5137	23.0877	11.345	9.05517	7.17085	796.852	139.242	32.96	12.1949	7.29864	2.3826	137.014	40.3988	35.7157	13.6781	7.10751	1.76384	111.287	31.6693	27.8219	10.3285	5.89552	1.43925	141.03	32.0418	36.5128	12.3384	5.99425
5	1	2	0.444444	1	0	0	1	0	32	1.5025e+06	1.52101e+06	-0.160219	-0.05906	0.889233	840.862	115.713	23.3021	13.2161	5.7499	1.31765	602.903	80.6979	19.1075	13.3583	9.39816	7.3679	1257.85	164.327	23.6095	11.5275	7.37465	2.51206	198.885	42.4156	26.4244	15.9453	8.49026	1.85938	164.211	33.3272	21.4601	13.3853	5.603	1.54603	211.286	36.6335	27.5477	15.792	6.29802
5	1	2	0.481481	1	0	0	1	0	32	1.88283e+06	1.75191e+06	0.2147	0.163905	0.900426	803.305	94.9196	39.2146	14.1415	7.66843	1.76813	552.382	69.214	30.6821	15.4442	15.0173	13.8484	1252.96	111.401	36.4946	13.242	8.32105	3.98928	203.777	46.1496	45.0837	15.0925	9.72746	2.30516	166.204	39.5977	35.2127	14.0245	8.00011	2.51986	210.849	33.2522	40.1274	14.7332	7.75311
5	1	2	0.518519	1	0	0	1	0	32	1.4833e+06	1.36895e+06	-0.190217	-0.22713	0.925333	616.528	106.887	24.8924	15.3412	6.39228	1.63435	466.736	79.4512	18.1477	15.8692	14.9062	15.7906	901.925	134.687	25.4849	13.2101	8.96096	5.6189	159.104	42.4655	24.9615	18.1015	9.20628	2.19785	139.061	34.5093	18.9566	14.1688	6.96508	1.97726	160.424	34.6464	27.3787	15.6026	5.97462
5	1	2	0.555556	1	0	0	1	0	32	1.82435e+06	1.65971e+06	0.145297	0.056313	0.877273	746.197	116.136	26.9952	11.4549	5.70041	1.88066	508.629	83.6847	24.8093	17.0782	16.3783	19.5729	1115.1	149.815	23.6884	12.3424	8.21812	7.10513	195.07	44.3514	29.3849	14.252	7.43158	2.17576	158.976	39.0796	23.2547	12.647	5.94713	2.64072	200.791	37.5936	27.3421	13.3616	5.57869
5	1	2	0.592593	1	0	0	1	0	32	2.15627e+06	2.1464e+06	0.471719	0.535498	0.848003	608.711	120.356	16.8721	5.24949	5.32442	1.8114	452.233	84.1173	12.8334	12.1787	13.9276	15.431	880.678	160.15	18.9702	8.99447	8.11583	7.6471	151.221	40.309	17.4346	6.27206	6.3985	2.17404	132.681	30.615	13.847	5.3373	5.93649	2.66572	145.133	33.1058	23.6271	6.71805	6.30062
5	1	2	0.62963	1	0	0	1	0	32	1.45185e+06	1.43335e+06	-0.238058	-0.18576	0.88573	864.078	122.519	21.5919	12.0198	6.50803	1.66143	547.678	84.639	19.2393	17.3389	17.4627	15.4566	1403.93	155.706	24.2117	14.0428	9.12665	7.67479	206.684	43.9663	22.2069	12.5425	8.07741	2.09506	155.796	33.6138	17.7898	12.1713	6.74951	1.91097	238.146	35.7752	26.7901	11.3432	5.66991
5	1	2	0.666667	1	0	0	1	0	32	2.4584e+06	2.11255e+06	0.763099	0.485401	0.906891	610.989	107.222	22.5417	8.18643	5.23814	1.79206	476.781	80.7327	15.9285	10.1981	9.58434	10.6838	877.989	144.874	24.6013	12.6856	9.0514	8.23754	147.455	36.8129	25.8561	10.6733	7.25378	2.44559	135.836	31.0227	18.709	8.59108	6.93398	2.90063	143.645	28.6805	26.2384	12.3627	5.91416
5	1	2	0.703704	1	0	0	1	0	32	1.78972e+06	1.5967e+06	0.088983	-0.038286	0.908815	748.291	105.325	24.9718	11.5491	6.46188	1.69689	533.364	79.8231	18.3588	16.1933	14.0463	14.0024	1179.95	144.836	26.3257	15.7016	8.64424	7.99017	162.317	38.1752	26.0459	14.1293	8.43179	2.18442	137.08	31.303	22.0168	11.8868	7.02096	2.20621	185.415	33.9887	26.9078	14.6267	5.65863
5	1	2	0.740741	1	0	0	1	0	32	1.67574e+06	1.60536e+06	-0.030438	-0.037412	0.905892	529.696	124.3	19.0881	6.78387	4.75823	1.37348	406.18	96.0924	14.3605	10.818	11.2117	12.5097	800.288	164.099	20.9521	12.3446	8.86186	8.40238	123.246	40.733	17.5747	6.95154	6.42902	1.78995	110.946	34.0081	13.0167	5.96475	5.18372	1.65204	126.574	33.0615	19.1298	7.0007	5.85097
5	1	2	0.777778	1	0	0	1	0	32	1.44754e+06	1.52453e+06	-0.264053	-0.126141	0.914477	762.458	115.539	38.2412	10.8559	5.5509	1.57163	579.369	95.1958	31.5937	14.6056	14.6554	14.8913	1112.05	154.037	34.3706	12.9821	10.2764	7.54943	188.321	34.9064	40.667	11.7569	7.42564	2.02152	169.916	35.0252	29.275	8.62379	5.74919	1.71432	184.823	32.4587	37.896	10.4911	5.29909
5	1	2	0.814815	1	0	0	1	0	32	1.65663e+06	1.47926e+06	-0.060366	-0.179417	0.932278	668.161	140.689	39.3698	9.99632	6.16236	1.66445	529.513	95.9996	29.7674	14.3176	13.3066	13.6959	921.734	189.298	41.3606	12.6319	10.2995	9.27813	168.119	51.4901	40.007	11.2273	8.48515	2.08101	159.719	39.5323	30.6605	9.83245	6.08764	1.91062	155.048	45.5934	43.2303	11.3506	6.34728
5	1	2	0.851852	1	0	0	1	0	32	1.4192e+06	1.45222e+06	-0.303311	-0.21387	0.894097	685.303	124.131	35.6951	16.1316	6.93071	1.94774	508.016	85.2891	26.6319	18.6185	19.1088	17.7119	1039.42	167.414	32.5505	16.1248	12.2186	9.09561	144.739	44.6383	37.4905	17.7351	8.72101	2.11193	129.24	37.6556	32.2569	12.9103	6.78253	2.14856	153.606	37.5985	38.3451	17.1357	6.59935
5	1	2	0.888889	1	0	0	1	0	32	1.51729e+06	1.64989e+06	-0.210624	-0.024206	0.912097	746.41	110.881	22.3192	9.98323	6.56143	2.81132	508.981	86.8925	25.8838	16.9056	18.5744	21.0842	1200.9	148.93	22.3665	13.0591	9.51556	9.25358	184.764	39.2188	20.8636	11.6749	8.12666	3.14026	144.676	31.9967	21.5623	13.4198	12.0141	6.09812	195.798	33.2775	23.5327	12.7459	7.02063
5	1	2	0.925926	1	0	0	1	0	32	1.58655e+06	1.45349e+06	-0.146811	-0.228359	0.906098	689.672	145.726	23.6241	11.6233	4.42929	1.33278	553.016	108.107	18.258	15.1388	13.2179	14.1256	1008.7	186.159	27.9719	15.8911	8.59654	8.45257	155.708	46.4667	22.5994	13.9452	6.06761	1.70995	147.021	37.6617	17.0906	12.3478	4.68559	1.56903	153.545	38.5747	25.6131	12.1863	4.64931
5	1	2	0.962963	1	0	0	1	0	32	1.71527e+06	1.76848e+06	-0.023385	0.078122	0.972999	787.096	136.908	42.3179	13.8339	5.27365	1.64891	536.541	89.2995	27.5661	17.0169	17.1624	16.5034	1234.82	183.214	47.556	18.038	9.75612	8.40452	187.079	45.703	39.0597	15.6407	7.31337	1.95656	152.143	35.8061	25.8479	13.3594	4.96964	1.8156	204.446	38.2078	39.8924	16.8904	5.68445
5	1	2	1	1	0	0	1	0	32	2.03996e+06	2.16788e+06	0.296007	0.468982	1.04203	824.989	146.415	26.9954	9.99098	5.38795	2.15335	586.396	109.648	22.1362	12.7617	11.8105	12.508	1294	200.138	27.4387	12.5897	8.5454	8.39947	185.918	41.0194	24.1485	11.1203	6.34726	2.62597	155.286	35.431	18.2663	9.54711	5.23687	2.75059	203.518	35.1482	29.9302	11.1983	4.77807
6	0	0	0.037037	1	1	0	0	0	28	1.59232e+07	1.29328e+07	7.18306	5.54017	0.978136	459.52	84.8029	11.246	2.65404	1.93851	1.2136	476.399	83.3339	12.0903	3.3528	2.78896	2.74619	586.759	105.035	14.5185	4.99674	5.85291	6.73015	99.449	22.9064	4.9099	2.21388	2.16341	1.40541	93.4066	18.798	4.30521	2.66766	2.39495	2.17361	119.757	25.3929	4.2711	2.2918	2.50245
6	0	0	0.074074	1	1	0	0	0	28	1.64036e+07	9.3075e+06	7.94812	2.124	0.95854	419.516	100.146	10.3989	2.35554	1.71334	0.92164	460.98	105.453	9.97786	2.90935	2.9283	2.76362	492.698	112.911	13.119	6.84636	8.07892	9.84758	101.151	26.4273	4.18858	2.12484	1.76284	1.09026	90.011	22.4218	2.94972	1.76578	1.75618	1.42615	109.265	26.9387	3.51084	2.03316	1.99293
6	0	0	0.111111	1	1	0	0	0	28	1.2975e+07	1.0118e+07	4.8041	3.14378	0.928857	548.011	112.158	14.7201	2.69504	1.8141	0.83512	736.105	141.184	16.6782	3.52642	2.95917	2.48049	577.275	118.423	16.8573	7.2367	6.0955	8.88773	146.199	26.2643	6.36393	2.33829	1.88019	1.03108	165.739	28.2157	5.39944	2.06996	1.79067	1.11948	137.841	25.858	4.9452	2.10313	1.8657
6	0	0	0.148148	1	1	0	0	0	28	8.04976e+06	9.09251e+06	0.16369	2.32663	0.98159	386.369	79.2779	9.98252	2.667	1.80423	0.95884	416.792	90.4435	10.8595	3.38143	2.77018	2.68402	425.04	78.4411	10.7918	7.14401	7.38192	10.4348	91.1295	20.7996	4.33425	2.35754	1.94229	1.15805	81.6078	19.2674	3.52677	2.0753	1.7908	1.19957	98.1498	18.94	3.53244	2.24248	2.01621
6	0	0	0.185185	1	1	0	0	0	28	3.9755e+06	8.10089e+06	-3.62585	1.54377	0.997275	223.845	47.6717	5.84756	1.96767	1.47468	0.87388	244.223	49.9564	7.30893	3.0282	3.01266	3.12755	255.679	51.5722	6.36455	7.57416	6.91815	12.2699	60.2159	14.6888	3.51436	2.05456	1.52776	0.97219	54.0769	11.6541	2.87895	1.6899	1.49243	1.05463	63.9386	14.5319	2.65509	2.07754	1.69992
6	0	0	0.222222	1	1	0	0	0	28	6.79475e+06	7.8313e+06	-0.522119	1.48412	0.899445	567.686	102.931	12.7138	2.74505	1.92023	1.10235	615.503	119.639	14.4654	4.22914	4.10483	5.39894	623.818	104.586	13.0608	8.98388	8.23104	10.3522	125.657	26.8517	6.18957	2.52116	1.97656	1.24119	117.024	26.3796	5.19005	2.294	2.08682	2.14651	138.623	25.1909	4.63856	2.54034	2.25869
6	0	0	0.259259	1	1	0	0	0	28	5.77585e+06	6.4277e+06	-1.25634	0.289481	0.897024	229.095	46.0738	6.13751	2.54173	2.01676	1.42158	315.163	50.7882	7.10607	3.6952	4.19928	5.77235	257.235	49.8006	7.53768	6.12343	7.35683	10.5666	66.4892	14.8222	3.95668	2.56147	2.1861	1.52525	77.6924	12.0263	3.17134	2.51383	2.80615	3.17147	60.2551	13.7093	3.14626	3.16483	3.06618
6	0	0	0.296296	1	1	0	0	0	28	8.04503e+06	6.88764e+06	1.29756	0.958182	0.912897	320.634	72.9674	8.25596	2.29318	1.35327	0.82687	323.802	79.1093	8.79292	3.39943	3.21461	3.50873	399.766	82.5312	10.7837	8.238	9.06369	10.7283	78.286	20.6371	4.75971	2.247	1.60095	0.95354	62.7376	17.7358	3.28879	1.80365	1.32226	0.88969	91.1454	19.5549	3.32779	1.96249	1.47684
6	0	0	0.333333	1	1	0	0	0	28	3.79956e+06	5.30418e+06	-2.66324	-0.416266	0.90417	393.809	73.1751	6.80783	2.15763	1.61571	0.831	426.447	81.8623	8.25123	3.59136	2.88022	3.17354	428.917	77.2822	8.64079	7.6163	8.23818	11.1556	101.589	22.6629	3.96054	2.21375	1.8182	0.96045	88.9675	19.2492	2.93733	1.96635	1.51453	0.90533	100.921	20.4519	3.07545	1.93672	1.54491
6	0	0	0.37037	1	1	0	0	0	28	3.61923e+06	4.82436e+06	-2.55881	-0.68752	0.938986	366.514	81.4784	9.82905	2.34366	1.59047	1.43735	401.651	92.1859	11.6203	4.58083	5.29628	7.75189	409.61	89.3873	12.043	9.43249	8.9918	13.647	88.0247	20.0948	4.31442	2.23699	1.64065	1.47759	79.2426	18.4703	3.74477	2.21241	2.2306	3.303	96.2547	20.3442	3.68134	2.21215	2.02579
6	0	0	0.407407	1	1	0	0	0	28	6.29593e+06	3.66773e+06	0.402538	-1.63506	0.922945	159.514	37.8847	6.63879	2.21345	1.48472	0.84045	167.586	40.885	7.28714	3.27817	3.01871	3.15688	164.447	36.8225	7.06521	5.95381	7.59443	9.80996	46.5751	12.7638	4.30543	1.91344	1.64836	0.97923	41.3288	10.0412	3.59816	1.66862	1.42578	1.04842	43.7505	10.4885	2.75139	1.54041	1.46246
6	0	0	0.444444	1	1	0	0	0	28	6.84989e+06	3.80736e+06	1.24128	-1.28697	0.967756	559.527	100.598	10.5266	2.52365	1.65695	0.80462	622.99	106.136	12.7354	3.74902	3.14466	2.71934	646.451	115.046	12.909	7.4754	7.36805	9.97601	129.624	25.7583	5.36626	2.16548	1.78768	0.89477	122.255	21.9783	4.26698	1.70676	1.4351	0.72347	138.635	27.3208	4.01133	1.93541	1.48348
6	0	0	0.481481	1	1	0	0	0	28	4.66137e+06	1.77973e+06	-0.662628	-3.1053	0.932394	408.608	75.0888	9.38043	2.40737	1.57845	0.73392	466.427	92.7471	10.4619	3.74607	3.52329	3.2569	427.632	73.7327	10.7883	10.3215	7.77016	10.6979	98.8954	21.1785	4.87622	2.34755	1.66479	0.85616	91.1706	19.5908	3.39866	1.79386	1.2244	0.71067	97.3916	19.0074	3.74137	2.11735	1.44001
6	0	0	0.518519	1	1	0	0	0	28	4.0227e+06	3.99534e+06	-1.01654	-0.681121	0.966364	398.723	99.9141	10.6704	2.39794	1.7491	0.87989	427.362	110.428	12.6687	3.49392	3.42542	3.17414	447.171	108.115	12.7441	7.40172	8.32401	9.63907	105.767	27.3173	5.14975	2.25267	1.94042	0.95202	90.3479	22.7038	4.2319	1.85237	1.36458	0.91342	110.813	25.8624	3.9816	1.95163	1.68505
6	0	0	0.555556	1	1	0	0	0	28	3.83552e+06	5.28179e+06	-0.91909	0.814529	0.940672	429.45	77.5365	10.779	3.086	1.96252	1.49297	470.154	84.7985	12.4711	4.29271	4.71148	6.3165	498.32	84.2264	13.8126	7.71606	7.84976	9.39137	100.246	22.9852	5.00631	2.60772	2.11564	1.77455	88.2663	19.1404	5.15809	3.1741	4.24039	9.30169	113.163	22.0767	4.45888	2.49435	2.48363
6	0	0	0.592593	1	1	0	0	0	28	3.10509e+06	3.08867e+06	-1.36244	-1.18176	2.1016	343.757	64.7033	10.9005	2.76005	1.69447	1.06702	383.691	69.4093	12.332	3.89344	3.41539	3.89387	369.181	72.3592	12.1972	6.86781	6.90968	9.19008	82.3868	19.5223	5.53279	2.52292	1.60943	1.01024	78.3029	15.9375	4.06741	1.99765	1.57057	1.1765	87.0551	19.0556	4.24419	2.21797	1.55794
6	0	0	0.62963	1	1	0	0	0	28	3.04399e+06	2.59983e+06	-1.14116	-1.45004	0.983943	346.143	72.7734	8.0438	2.36509	1.54079	1.00762	412.098	87.2381	9.84563	3.32829	3.90475	4.38449	344.775	69.4627	9.07817	7.93095	7.76513	10.5039	94.8436	21.4105	4.29235	2.30766	1.68996	1.1625	92.5989	19.5661	3.29745	2.02848	2.27919	2.5095	87.3252	17.5984	3.35288	2.1723	1.65758
6	0	0	0.666667	1	1	0	0	0	28	1.55616e+06	3.30951e+06	-2.34439	-0.530945	0.937645	307.773	56.4781	6.32819	2.61338	1.58971	1.00927	355.924	66.554	7.13468	3.60787	3.68415	3.89105	316.502	55.1165	7.78666	8.27786	7.84412	11.6285	82.8199	16.7315	3.91071	2.44458	1.65527	1.09914	76.7568	15.4356	2.81336	2.1616	1.85264	1.73949	78.0539	15.3207	2.94922	2.1967	1.58913
6	0	0	0.703704	1	1	0	0	0	28	1.76916e+06	2.12979e+06	-1.84661	-1.50225	0.986569	459.8	82.4893	11.3564	2.85329	1.62627	1.00584	543.181	95.5518	13.078	4.3491	3.597	4.21847	453.768	83.2092	13.8804	9.22747	8.02562	11.4987	121.118	22.0633	5.76887	2.45157	1.64297	1.10995	118.277	20.1021	4.45664	2.05463	1.82478	1.54307	111.554	20.383	4.59277	2.24195	1.55822
6	0	0	0.740741	1	1	0	0	0	28	2.63658e+06	2.77695e+06	-0.694496	-0.64616	0.986493	497.662	94.0841	10.4432	3.08703	2.38735	1.6821	560.341	108.338	12.9781	5.80553	6.87004	8.62824	507.819	96.9579	11.8692	9.14846	10.1921	13.8449	147.196	24.2575	4.73818	2.9068	2.55168	1.94343	136.643	23.4329	4.41404	3.79942	6.55079	8.04517	135.063	22.9659	4.03461	2.95755	3.5733
6	0	0	0.777778	1	1	0	0	0	28	2.39174e+06	3.59846e+06	-0.654667	0.384354	0.979241	194.588	41.9826	5.68149	2.38178	1.81527	1.11794	215.397	47.8693	6.25269	4.60627	5.00391	7.78521	200.141	42.0765	6.40992	9.51653	9.33553	14.4518	61.4801	13.2789	3.82484	2.27047	1.98355	1.24793	55.1072	11.7881	2.91292	2.05837	2.32516	2.03886	57.2169	11.6325	2.7436	2.37676	2.25871
6	0	0	0.814815	1	1	0	0	0	28	1.61069e+06	2.4393e+06	-1.15108	-0.565614	0.95327	300.43	50.4392	6.42456	2.72827	1.72709	1.18713	407.033	57.0453	8.32031	4.59724	4.25036	5.70668	326.573	57.1838	7.46181	12.3943	9.58544	17.8424	80.6704	14.847	3.94945	2.64488	1.74819	1.27936	97.5811	13.4061	3.44956	2.30561	1.84987	1.73135	74.106	15.1311	2.84853	2.77149	1.92803
6	0	0	0.851852	1	1	0	0	0	28	1.59178e+06	1.37713e+06	-0.885442	-1.41818	0.889117	498.362	83.3966	11.2172	3.1662	1.91577	1.10161	565.058	91.3281	12.9701	5.1303	5.08258	5.10181	541.656	93.8003	13.3421	11.9032	10.0867	17.6978	120.45	22.5445	5.24686	2.77623	2.08937	1.24638	116.139	19.5459	4.01665	2.4358	2.18314	1.59612	123.407	22.8126	4.11568	2.57104	2.23913
6	0	0	0.888889	1	1	0	0	0	28	2.93841e+06	2.08634e+06	0.745905	-0.50022	0.905129	620.376	110.809	10.8697	3.20493	2.33427	1.88607	704.67	128.485	12.5583	4.26192	6.20423	7.30361	665.206	121.747	14.6139	7.81972	7.80047	12.3912	153.893	27.7269	5.74809	3.08805	2.33057	2.14102	155.763	25.958	4.65592	3.23341	3.63409	6.09418	155.347	28.1018	4.78612	3.14381	2.94524
6	0	0	0.925926	1	1	0	0	0	28	1.68324e+06	2.74076e+06	-0.224369	0.362065	1.00704	483.265	93.1447	11.227	3.19708	1.99938	1.42302	617.134	104.454	13.8343	4.84916	4.38571	4.8466	477.27	100.607	11.9783	7.69244	6.38471	10.9307	128.944	25.986	5.15047	2.92567	1.99901	1.53419	148.55	24.6014	4.44514	3.30478	2.86445	2.6145	120.316	24.431	3.88047	2.92852	2.4368
6	0	0	0.962963	1	1	0	0	0	28	2.05607e+06	2.54845e+06	0.43295	0.379684	0.910876	400.796	92.3999	11.1166	2.9819	1.89791	1.40813	494.535	102.169	12.9583	4.85589	4.21127	5.19307	449.893	100.388	12.571	7.23273	7.25134	10.1992	97.4525	26.3282	4.88351	2.57819	2.09993	1.73575	105.372	22.8006	3.85381	2.75623	2.98485	3.50848	103.212	24.4088	3.82383	2.50088	2.755
6	0	0	1	1	1	0	0	0	28	3.63167e+06	2.35529e+06	2.29332	0.395029	0.951747	450.41	83.0243	12.5985	3.18371	3.48339	3.60134	512.003	93.3305	14.3185	6.08333	11.236	20.6274	476.117	88.5982	13.2018	5.37905	6.29865	9.33843	111.747	23.3388	5.80443	2.87957	3.82795	3.78839	113.438	21.3703	7.23209	5.36199	12.5855	17.4864	120.343	22.181	5.54506	3.74272	7.81042
6	0	1	0.037037	1	0	1	0	0	28	1.71059e+06	1.93301e+06	-0.394464	-0.249176	1.61739	507.943	93.3272	8.92342	2.67916	1.74341	1.34375	585.552	103.465	9.98575	3.38789	3.50468	4.8356	590.613	102.573	10.3546	4.27469	3.89325	5.78405	112.019	24.9887	4.39793	2.68791	1.80547	1.54435	111.74	23.3179	3.67595	2.66588	2.78712	3.55389	124.936	24.879	3.65231	2.87201	2.3079
6	0	1	0.074074	1	0	1	0	0	28	2.19103e+06	2.75159e+06	0.094839	0.593252	1.34217	472.928	83.2434	10.4589	2.89429	3.06021	3.16924	718.352	105.728	15.4287	4.60084	9.574	19.9496	482.362	85.8711	9.17408	4.53652	5.33238	7.66859	138.396	22.4122	5.82535	2.59031	3.25455	3.25391	182.8	23.4655	5.95717	3.62482	8.72151	12.607	114.481	19.9179	3.76253	2.92841	6.53782
6	0	1	0.111111	1	0	1	0	0	28	2.39485e+06	1.62303e+06	0.310922	-0.528653	2.71852	413.944	109.305	13.3081	3.18232	1.82942	1.41806	452.63	118.931	16.1578	3.48504	2.63855	3.22647	451.996	119.853	13.5365	3.92789	2.84564	4.07772	106.483	27.0191	5.43836	2.50828	1.98216	1.67855	98.1423	25.0196	5.40121	2.33653	2.35264	2.72445	106.883	26.8996	4.10872	2.41975	2.41892
6	0	1	0.148148	1	0	1	0	0	28	2.10201e+06	2.20421e+06	0.026638	0.077932	2.2952	405.022	101.784	11.5458	2.94568	1.77418	0.98465	470.922	114.276	12.3815	3.56252	3.26741	3.42959	438.661	105.564	12.4232	3.61124	2.79566	4.02812	93.411	26.5469	5.20365	2.54498	1.81363	1.13567	93.7046	24.0096	4.43725	2.65769	2.41696	2.32835	101.773	25.4088	3.89609	2.05166	1.58993
6	0	1	0.185185	1	0	1	0	0	28	1.99586e+06	1.73297e+06	-0.071728	-0.363995	1.49547	325.92	72.7784	8.90929	2.5142	1.68413	0.84959	368.568	83.778	10.503	3.31657	2.6567	2.87465	345.148	73.0198	8.43451	3.80657	3.61008	4.66887	82.1792	20.6367	4.22067	2.28588	1.77703	1.03035	74.8751	17.3093	3.53022	2.03999	1.69717	1.21258	84.2923	18.5648	3.27826	1.67007	1.67365
6	0	1	0.222222	1	0	1	0	0	28	1.76929e+06	1.71926e+06	-0.286393	-0.36924	2.69793	424.998	79.8754	9.93104	2.73679	1.66188	1.14148	480.136	93.8145	10.4013	3.2664	2.91549	3.10195	429.216	74.3065	10.1142	4.38367	3.217	5.01351	115.401	21.4595	4.97913	2.35623	1.84363	1.33573	112.615	20.5466	3.94644	2.04696	1.67339	1.45663	111.284	18.805	3.74868	1.90176	1.51223
6	0	1	0.259259	1	0	1	0	0	28	2.53434e+06	1.73472e+06	0.487948	-0.332103	2.63269	405.522	72.4064	8.2326	2.27372	1.54338	0.88552	435.434	76.2426	9.21066	2.89674	2.58607	2.83207	452.843	74.0533	7.63064	4.78947	4.157	5.1175	101.449	22.681	4.19228	2.15025	1.609	1.03521	88.8657	18.0079	2.84606	1.92749	1.43502	1.18922	106.957	20.9703	3.21863	1.82427	1.45326
6	0	1	0.296296	1	0	1	0	0	28	2.69351e+06	2.10853e+06	0.654005	0.075539	1.39908	459.321	79.7712	9.58481	3.45242	2.35804	1.3273	591.776	85.8908	10.7637	4.0554	4.10501	3.70376	466.758	87.4517	10.7829	5.83161	4.24139	6.30664	121.318	24.0078	5.42965	3.26102	2.46304	1.59406	133.518	20.6995	4.57193	3.00255	2.55194	2.20787	108.89	23.6609	3.75558	2.9692	2.14897
6	0	1	0.333333	1	0	1	0	0	28	2.125e+06	2.28133e+06	0.094621	0.270869	1.25168	348.26	84.4733	12.5421	2.77535	1.94351	1.73717	374.974	89.0731	13.0079	3.80597	4.79305	7.95761	377.024	88.7753	12.9679	4.87152	4.2325	7.05648	90.3435	24.9145	6.06735	2.54218	2.06438	1.95738	80.9546	21.0535	5.31357	3.35137	3.69843	7.60044	91.1407	23.0734	4.84419	2.71745	2.49902
6	0	1	0.37037	1	0	1	0	0	28	1.36874e+06	1.85264e+06	-0.652104	-0.137377	1.30394	344.225	79.1812	8.70713	2.39436	1.74303	1.04141	381.563	82.6484	9.28286	3.22982	3.21392	3.79366	369.29	80.1805	9.2255	5.02874	3.97234	6.46011	95.5209	26.0427	4.67313	2.25955	1.9042	1.19126	87.1563	20.9405	3.53712	2.16974	2.05628	1.62542	97.2782	22.3422	3.68903	2.10695	1.76946
6	0	1	0.407407	1	0	1	0	0	28	1.83842e+06	2.45337e+06	-0.172139	0.479983	1.72224	344.203	63.9037	7.93359	2.7553	1.80087	1.06028	393.704	69.0045	8.83447	3.74683	4.01869	4.41715	360.823	67.2519	8.17464	5.98637	4.37854	6.69663	93.7826	18.0354	4.23871	2.53149	1.93958	1.19972	85.644	14.8833	3.54915	2.19444	2.09163	1.6422	96.2241	16.616	3.45398	2.47855	2.02062
6	0	1	0.444444	1	0	1	0	0	28	1.76095e+06	2.29303e+06	-0.23866	0.332984	2.45669	264.282	58.8613	7.21595	2.63879	1.8522	1.08635	290.699	62.0742	8.00314	3.74938	3.79978	4.46614	295.239	57.1289	7.24163	6.25843	4.64961	7.42279	69.2048	21.3933	4.59749	2.46541	1.87962	1.39442	64.1488	17.6235	3.38148	2.69098	2.13907	2.17019	73.1709	17.4268	3.61868	2.83452	1.84933
6	0	1	0.481481	1	0	1	0	0	28	2.92302e+06	1.87537e+06	0.931144	-0.055123	1.63491	213.727	47.6981	7.30382	2.87597	1.86127	1.08394	258.965	51.6146	7.95044	3.96798	3.81822	4.23566	202.577	45.3989	7.20923	6.81838	3.96862	7.45727	64.8495	17.4954	4.55287	2.56072	1.872	1.25627	61.2773	14.1675	3.36419	2.72018	2.09146	2.03255	55.9111	13.978	3.57009	2.40984	1.90958
6	0	1	0.518519	1	0	1	0	0	28	2.64544e+06	2.38868e+06	0.662257	0.482884	1.27862	279.135	50.7331	6.81946	2.5324	1.77178	1.14927	308.509	49.9954	7.66452	3.93517	3.54286	4.54497	312.007	54.5306	6.60801	5.42288	4.93482	7.30938	78.0068	17.7166	4.60773	2.48512	1.91358	1.51654	72.3905	13.8789	3.84533	2.98801	2.65715	3.02205	81.5339	16.6421	3.26332	2.38243	2.26075
6	0	1	0.555556	1	0	1	0	0	28	1.5267e+06	1.93218e+06	-0.446656	0.045353	1.47266	233.714	30.0538	5.23295	2.2987	1.60665	1.1214	267.491	33.9455	5.87255	3.45697	3.63982	4.39103	224.822	26.782	4.40055	6.17001	4.35529	8.27592	70.3198	12.8944	4.42129	2.29997	1.6749	1.30808	62.9771	10.0793	3.01749	2.3316	2.05996	2.08136	64.8854	9.48697	2.71885	2.20853	2.02643
6	0	1	0.592593	1	0	1	0	0	28	1.56734e+06	2.13777e+06	-0.39641	0.271037	1.55837	245.306	42.9951	5.41499	3.09927	2.05185	1.12936	350.101	49.1197	5.84549	3.78627	4.2427	4.34695	221.503	35.2884	5.26926	6.06869	4.68627	7.59533	78.8225	18.1534	4.16829	2.9165	2.07126	1.31187	91.9847	15.3812	3.22024	2.95561	2.49548	2.23469	65.242	12.7958	2.86589	2.59642	2.29677
6	0	1	0.62963	1	0	1	0	0	28	1.14195e+06	1.57871e+06	-0.810725	-0.275374	2.35911	311.639	60.6373	7.44279	2.08776	1.71868	0.94589	367.56	64.6145	8.64959	3.44347	3.60879	4.11499	303.532	57.5129	6.75863	5.58762	4.52164	7.81649	85.8896	19.6273	4.48731	2.33413	1.92077	1.13121	80.4375	16.4621	3.44307	2.09775	2.08167	1.67776	82.9768	17.0731	3.24991	2.31693	1.86131
6	0	1	0.666667	1	0	1	0	0	28	1.17993e+06	2.0216e+06	-0.761546	0.179585	3.21607	269.956	52.8108	8.78994	2.65057	2.83543	3.33573	309.516	58.419	10.5655	6.26708	15.2812	26.6157	308.605	58.3423	9.3489	5.61557	7.33588	10.5749	67.8345	16.3318	5.0022	2.47959	2.9601	3.3941	66.9698	14.0563	5.02417	4.12882	10.2933	21.1548	69.4454	15.6207	3.76887	2.8551	5.60657
6	0	1	0.703704	1	0	1	0	0	28	1.89829e+06	1.59859e+06	-0.035074	-0.215798	2.57861	371.784	81.4848	9.14436	2.72075	2.23208	1.67519	439.506	95.0061	11.091	4.65157	5.42252	8.45993	386.543	80.5576	10.4306	6.98788	5.84929	9.23742	104.205	24.4509	4.75507	2.48556	2.16446	1.70109	98.2882	22.4356	3.76344	2.89204	3.27641	3.94533	104.001	21.4926	3.89264	2.47246	2.39703
6	0	1	0.740741	1	0	1	0	0	28	1.99254e+06	1.64292e+06	0.073045	-0.172912	4.73234	275.608	45.005	6.06916	2.30309	1.96351	1.17271	322.641	51.3642	7.39175	3.85783	4.21285	4.73504	256.188	41.5875	5.91516	6.45045	5.71604	8.22059	80.6517	16.6762	3.45477	2.2069	1.95242	1.26874	74.5992	13.7078	2.73583	2.51196	2.28176	2.18395	69.8159	13.2792	2.69238	2.30427	2.4438
6	0	1	0.777778	1	0	1	0	0	28	2.20264e+06	1.43311e+06	0.285514	-0.326056	1.30697	268.449	48.2722	6.70128	2.94085	1.99447	1.11881	332.497	55.4624	7.92814	4.01196	4.53497	4.19441	267.981	43.3045	6.27835	7.24375	5.85057	8.09669	76.8649	16.108	4.71569	2.93432	2.07915	1.31214	73.7644	13.9009	3.53951	2.6399	2.60778	2.08185	71.7086	12.9365	3.19124	3.04045	1.97833
6	0	1	0.814815	1	0	1	0	0	28	2.24565e+06	1.03711e+06	0.34119	-0.717438	2.87926	182.739	33.3298	5.97324	2.49105	1.94852	1.17921	233.619	40.8434	7.53999	4.14786	4.1444	4.28042	160.75	30.9073	5.62709	6.74464	5.67552	8.67962	62.337	12.8378	3.94116	2.41459	1.95012	1.37515	60.8503	12.094	3.3471	2.63268	2.33623	2.21403	48.6744	10.0798	2.84902	2.38806	1.97968
6	0	1	0.851852	1	0	1	0	0	28	1.92805e+06	1.17397e+06	0.030513	-0.546942	1.66523	285.134	64.265	7.56256	2.50585	1.79008	0.99808	345.376	72.3067	9.05733	4.30485	4.06592	4.47652	278.915	64.0169	7.63239	6.21319	5.28309	8.00051	78.4764	20.1148	3.80222	2.21294	1.98734	1.1575	78.4299	16.3101	3.08472	2.21871	2.31873	1.8801	72.0011	17.8905	2.92351	2.37638	1.93752
6	0	1	0.888889	1	0	1	0	0	28	1.6384e+06	2.02549e+06	-0.248983	0.321882	2.0184	368.188	62.7714	7.60416	2.59606	1.60725	1.20187	449.424	73.8612	9.27527	4.1783	4.34667	4.97937	359.798	60.937	7.53303	6.43278	5.23135	6.88649	96.3212	19.141	3.85947	2.6939	1.8016	1.43559	95.4145	17.5492	3.27326	2.70683	2.67368	2.60338	89.8608	17.3982	3.07018	2.7527	2.15162
6	0	1	0.925926	1	0	1	0	0	28	1.70341e+06	2.27419e+06	-0.17558	0.596823	1.51431	245.483	40.0867	6.08637	2.92788	1.89585	1.15859	326.275	52.2079	6.33862	3.93881	4.05669	4.72255	222.274	31.4032	6.10336	6.14569	5.05795	8.13107	68.3616	15.5398	4.54111	2.7578	2.10492	1.35744	68.5236	13.79	3.27326	2.83488	2.39123	2.16917	60.7928	10.769	3.18884	2.57365	2.04136
6	0	1	0.962963	1	0	1	0	0	28	2.32464e+06	2.36677e+06	0.454646	0.712562	1.30588	489.224	56.5116	7.86296	3.82474	2.05509	1.37563	813.591	71.1253	8.46876	4.768	4.89328	5.02226	384.298	54.7173	8.47767	7.13193	4.92044	7.66103	134.621	19.1049	5.10013	3.467	2.39082	1.52039	188.826	18.1952	3.98468	3.54045	2.97036	2.79471	90.7623	15.4534	3.90595	3.274	2.47462
6	0	1	1	1	0	1	0	0	28	1.88984e+06	1.39559e+06	0.033585	-0.259415	3.39789	241.222	29.9744	4.10261	3.0016	2.04566	1.06044	282.64	33.5113	4.67883	4.39169	4.34411	4.10298	229.679	25.5323	4.13072	4.90494	4.78516	7.53524	73.5768	15.0894	3.9715	2.82256	2.12771	1.1742	68.2688	11.5788	2.80642	2.73482	2.3778	2.0411	67.7031	9.98518	2.62606	2.44777	2.12636
6	0	2	0.037037	1	0	0	1	0	28	1.80184e+06	1.60006e+06	0.005128	-0.117147	0.992274	349.076	83.1135	10.6366	3.25793	2.58314	1.88482	365.775	90.0731	11.4308	3.49043	3.32825	4.59135	386.854	90.1489	10.4137	3.8019	3.7166	5.16824	94.6816	21.321	5.18082	2.76671	2.56277	1.94949	87.1317	18.4302	4.12234	2.40973	2.58489	2.84937	100.067	23.1693	4.99754	2.77761	3.54384
6	0	2	0.074074	1	0	0	1	0	28	1.80211e+06	1.38508e+06	0.006907	-0.318408	0.946621	313.484	61.8422	9.40669	2.86441	1.64518	0.76436	354.887	72.2845	10.2189	2.78557	1.8027	1.18891	323.386	62.6998	8.1633	3.02582	1.99607	2.03591	84.0671	19.645	5.10384	2.70544	1.75751	0.87027	76.5999	17.1998	3.85343	2.1091	1.35981	0.69925	82.7491	16.7444	3.6645	1.96958	1.31528
6	0	2	0.111111	1	0	0	1	0	28	1.16706e+06	1.00166e+06	-0.626561	-0.688504	0.939857	185.871	46.3757	5.72723	2.3387	1.56337	0.75841	213.153	51.733	6.64923	2.57441	1.87984	1.44845	214.093	47.7353	5.36437	3.27261	2.20418	2.671	53.1093	15.8411	3.81523	2.27762	1.65414	0.89937	50.605	13.2698	2.90329	1.87902	1.38829	0.91882	53.4373	12.8526	2.68272	2.13316	1.27525
6	0	2	0.148148	1	0	0	1	0	28	1.41861e+06	862157	-0.373397	-0.814779	0.942315	255.343	42.609	5.85033	2.46237	1.45209	0.73229	268.938	45.8641	5.87569	2.49832	1.83931	1.53814	275.215	40.7291	5.7578	3.34603	1.97993	2.76039	72.3036	15.8686	4.06436	2.36718	1.492	0.87388	61.5354	12.7496	2.91955	1.77442	1.33808	0.93269	73.3605	11.9625	2.88932	1.89059	1.22259
6	0	2	0.185185	1	0	0	1	0	28	1.6351e+06	1.47851e+06	-0.155296	-0.185262	0.950394	138.674	26.6087	5.14647	2.49207	1.71153	0.76852	155.663	28.82	5.17883	2.59823	2.01596	1.50117	122.474	22.8616	4.57264	3.27028	2.27516	2.75351	48.9529	12.1914	3.57162	2.3345	1.55927	0.9066	42.2698	9.25956	2.58278	1.86808	1.35282	0.8071	39.778	8.83836	2.6923	2.08271	1.29761
6	0	2	0.222222	1	0	0	1	0	28	2.38824e+06	2.43007e+06	0.599314	0.780236	0.884205	533.872	63.135	7.37903	2.87012	2.52779	2.59979	565.14	67.712	8.72362	4.83383	11.0106	20.1689	583.536	66.6936	7.34433	3.42957	4.26156	6.08034	123.086	20.5179	4.22921	2.85301	2.69851	2.70262	109.611	17.1007	4.94762	4.1485	10.2027	15.1779	130.979	17.8219	3.40834	3.43306	4.67964
6	0	2	0.259259	1	0	0	1	0	28	1.37522e+06	1.24358e+06	-0.41219	-0.392563	0.842379	186.889	26.97	5.41288	2.6488	1.60559	0.749	236.269	34.4841	5.53855	3.0743	2.42419	2.13024	172.345	22.5149	4.74484	3.2114	2.26927	3.02657	59.2078	13.292	3.95847	2.64525	1.7487	0.8991	57.6446	10.4113	2.53805	2.20413	1.78263	1.33656	52.1231	8.79864	2.85871	2.12902	1.42901
6	0	2	0.296296	1	0	0	1	0	28	1.88518e+06	1.18946e+06	0.099354	-0.433342	0.83385	198.01	28.0623	4.4635	2.32778	1.41069	0.77529	249.378	35.0465	5.11115	2.65452	2.93153	2.43313	184.611	26.4214	3.85936	3.48339	2.07232	3.02873	59.5858	11.4248	3.44429	2.37022	1.45898	0.94126	59.1415	9.60836	2.56623	1.81226	1.7491	1.23196	53.4859	8.74274	2.55192	1.99039	1.15033
6	0	2	0.333333	1	0	0	1	0	28	1.67794e+06	2.02475e+06	-0.106228	0.414888	0.863514	204.367	33.9894	4.90755	2.64641	1.93036	1.14021	330.582	44.1604	5.97837	2.66147	3.35756	3.5185	159.255	26.1276	4.29993	3.12537	2.75103	3.5988	72.2143	15.3446	3.82994	2.64828	1.98519	1.29801	88.3949	13.4564	3.01133	2.40296	2.27463	2.49994	47.7824	10.5662	2.57267	2.40778	2.15336
6	0	2	0.37037	1	0	0	1	0	28	2.19776e+06	2.16628e+06	0.415277	0.569253	0.903344	343.515	61.1926	9.08275	5.08695	6.0851	8.2503	430.931	78.5772	12.216	9.01325	20.9803	34.2034	373.501	59.4385	11.1554	9.09694	17.6493	24.2776	104.475	19.9919	4.89143	4.72203	5.90353	7.96981	106.59	21.2984	6.2776	8.58555	18.4553	29.4619	109.474	17.8385	5.54455	7.45769	16.1082
6	0	2	0.407407	1	0	0	1	0	28	2.1634e+06	1.76271e+06	0.382489	0.17909	0.88902	258.543	35.1617	6.6863	2.49563	2.03916	1.52641	323.294	41.0233	7.37667	3.87353	6.01916	10.1268	250.768	35.2338	5.27997	3.05401	2.4055	3.24128	80.3822	13.6529	4.94301	2.62479	2.1158	1.64233	80.5942	12.043	4.54565	3.00762	3.86307	6.64038	69.6053	11.5125	3.27442	2.18317	1.86679
6	0	2	0.444444	1	0	0	1	0	28	1.61306e+06	1.63271e+06	-0.166371	0.06297	0.828473	289.885	42.0725	6.23305	2.51401	1.85375	1.69479	362.472	46.3463	6.22284	3.60153	6.19947	8.9919	279.571	42.3253	5.76243	3.0706	2.45713	3.48108	73.3867	15.4069	4.68584	2.39763	1.70491	1.87316	82.488	13.3085	3.79696	2.45019	2.83623	8.66961	71.2492	12.7843	3.18482	1.87541	1.60464
6	0	2	0.481481	1	0	0	1	0	28	1.51819e+06	1.8199e+06	-0.259486	0.262621	0.90428	158.792	33.1211	5.32696	2.91686	1.58596	0.92798	175.694	34.0083	4.69086	3.8364	2.91003	4.48734	164.803	31.4194	4.54867	3.54573	2.15376	2.89438	56.3635	17.1489	5.03475	2.82241	1.72259	1.05835	50.2171	12.6958	3.19709	2.46362	1.81682	1.6142	51.5518	12.0934	3.26964	2.26438	1.22532
6	0	2	0.518519	1	0	0	1	0	28	1.69325e+06	1.53187e+06	-0.08269	-0.012834	0.969173	370.26	53.5704	7.62617	3.24027	1.81945	1.1731	437.93	56.4522	7.90545	3.13743	2.62564	2.05846	398.383	56.2597	6.38275	3.62141	2.4693	3.15722	99.486	15.9237	4.82179	2.88454	1.98226	1.31756	101.933	13.8849	3.83379	2.21432	1.83997	1.42943	94.5977	13.5428	2.94093	2.20821	1.44137
6	0	2	0.555556	1	0	0	1	0	28	2.18961e+06	1.19388e+06	0.41513	-0.336861	0.900364	195.012	41.7463	6.64342	2.23181	1.68095	0.92623	224.159	49.206	6.93291	2.40691	2.5437	2.409	198.842	38.9656	6.01929	3.32237	2.52315	3.17765	63.6174	17.0964	4.2775	2.26284	1.78878	1.0526	57.7753	14.0854	3.02606	2.06102	1.72716	1.47389	59.8487	12.8671	2.87009	1.89208	1.53289
6	0	2	0.592593	1	0	0	1	0	28	1.76345e+06	1.43641e+06	-0.009352	-0.081481	0.939662	202.602	29.8494	5.2271	3.08538	1.81622	0.94731	238.012	31.106	5.35698	2.76443	3.40128	2.99173	199.653	29.0588	4.19194	3.40466	2.46572	3.26345	61.3488	15.1477	4.50606	2.75734	1.87511	1.10356	55.2591	11.2124	3.35001	2.13666	2.1224	1.88869	57.156	11.0164	2.74398	2.45603	1.55617
6	0	2	0.62963	1	0	0	1	0	28	1.71054e+06	1.43101e+06	-0.060688	-0.073491	0.926341	158.236	30.4975	6.11849	2.62441	1.57996	0.91681	193.911	34.3742	6.28566	2.97544	3.03724	2.83454	152.566	28.8784	5.30122	3.96622	2.68827	3.94548	53.2514	12.9119	4.4388	2.54179	1.82517	1.03848	49.6407	10.2229	3.20766	2.46782	2.1375	1.41128	46.4777	9.61779	2.96639	2.20498	1.72766
6	0	2	0.666667	1	0	0	1	0	28	1.48722e+06	1.90527e+06	-0.282433	0.414163	0.912053	269.327	68.8239	9.34326	3.70194	2.90456	2.68889	287.62	69.7893	9.27896	4.20491	4.56495	5.29401	294.237	74.1696	10.4559	4.77554	5.0436	7.48795	77.9191	20.793	4.62668	3.28291	2.80531	2.72403	68.8017	16.6642	3.27599	2.98941	2.86604	3.29202	77.2809	19.2624	3.73871	2.55318	2.58845
6	0	2	0.703704	1	0	0	1	0	28	1.41594e+06	1.53801e+06	-0.352051	0.05986	0.940538	166.463	37.9295	5.07656	2.68153	3.01522	4.24031	186.26	39.3513	6.01394	5.97101	14.6324	32.781	183.292	39.2922	5.19631	4.00047	4.9077	8.00303	49.3872	14.4437	3.55504	2.58913	2.77041	3.82233	46.7177	12.4844	3.37105	3.24586	9.26544	18.2174	47.8709	12.4032	2.59533	3.1134	4.07242
6	0	2	0.740741	1	0	0	1	0	28	2.23818e+06	1.24993e+06	0.471748	-0.214747	0.919484	176.311	33.641	6.04103	2.22775	1.48486	0.91814	202.83	34.8985	5.34775	2.39396	2.1924	1.9234	177.561	33.0062	5.47463	3.25142	2.92872	4.08691	56.534	14.5547	4.31548	2.01893	1.59699	1.0642	52.9327	10.4626	2.77192	1.83551	1.58316	1.28625	50.8086	10.6724	2.8943	1.66281	1.39006
6	0	2	0.777778	1	0	0	1	0	28	1.13977e+06	1.01163e+06	-0.625029	-0.439966	0.935565	274.746	44.0948	7.84012	3.05362	1.82834	1.00213	340.549	52.2608	8.39206	3.09336	3.09055	2.67607	286.621	46.0489	7.58496	3.95866	3.23816	3.84321	78.8211	15.2125	4.9411	3.05008	1.94972	1.153	79.0502	13.1533	3.66319	2.55651	2.18909	2.28774	75.5052	13.0248	3.44189	2.56975	1.86959
6	0	2	0.814815	1	0	0	1	0	28	1.86252e+06	1.79071e+06	0.099392	0.351995	0.970879	154.041	32.1351	6.52448	2.96347	2.15239	1.66899	165.388	36.7525	6.35492	3.23041	4.42269	5.72217	149.592	29.9407	5.70265	4.52766	4.35561	6.1564	53.9058	14.3937	5.27473	2.89842	2.26757	2.06056	46.634	11.9995	3.89858	3.42307	4.12052	6.78938	46.7336	10.6563	3.67188	2.71581	3.17985
6	0	2	0.851852	1	0	0	1	0	28	2.06387e+06	1.38023e+06	0.302507	-0.046021	1.04703	323.975	52.9825	7.98764	2.79504	1.64753	0.96837	372.116	58.095	8.24073	3.17475	2.92554	2.66961	342.086	53.4285	8.20315	4.60908	3.54202	5.50428	93.1055	17.4553	4.52944	2.8032	1.99921	1.12945	87.92	14.4541	3.59596	2.47808	2.24878	1.67468	83.6327	14.6729	3.3235	2.35313	1.78598
6	0	2	0.888889	1	0	0	1	0	28	1.8189e+06	1.29871e+06	0.05914	-0.114313	1.04943	204.292	33.6977	6.46114	2.91819	2.07663	1.07218	233.097	36.6482	5.85173	3.10926	3.21511	2.74265	216.303	33.0209	6.4517	4.31295	4.32602	5.65162	64.2251	14.403	4.79096	2.68734	2.18089	1.25625	57.1886	11.4409	3.07968	2.60024	2.35077	1.87048	59.114	10.6589	3.24453	2.43911	1.90921
6	0	2	0.925926	1	0	0	1	0	28	1.79236e+06	1.39165e+06	0.034347	-0.008837	1.11785	230.311	38.0755	5.9566	2.18805	1.75041	1.05026	277.903	41.9604	6.6211	2.89989	2.88554	2.6683	233.977	39.169	5.80797	4.2082	4.38232	5.60878	66.8123	14.9035	3.99254	2.23745	1.91817	1.23893	66.4104	11.2541	3.11395	2.3019	2.36928	2.22945	59.9135	11.0141	2.87974	2.30269	1.86433
6	0	2	0.962963	1	0	0	1	0	28	2.07771e+06	1.83615e+06	0.32125	0.449149	1.09537	290.278	35.9553	6.05021	3.31899	2.37567	1.66926	404.542	41.9578	6.7021	3.84979	4.07325	3.92613	262.59	34.4539	5.89052	4.71387	4.70431	6.84498	86.934	13.4122	4.18551	3.09621	2.53735	1.75321	97.4713	11.2612	3.21019	3.33203	3.06092	2.96954	74.5059	10.5495	2.90411	2.506	2.3033
6	0	2	1	1	0	0	1	0	28	1.52023e+06	1.34827e+06	-0.234782	-0.024704	1.02092	190.634	28.5212	4.75627	2.63587	2.31091	1.4525	239.507	32.3721	5.36349	3.42881	4.84825	7.00208	191.54	25.9721	4.42348	4.49631	5.12407	6.74683	64.7833	14.1529	3.49158	2.53531	2.24786	1.5283	65.7596	11.6316	3.07397	3.19587	4.88735	5.41072	52.4146	9.21132	2.43151	2.3749	2.68303
6	1	0	0.037037	0	1	0	0	0	28	1.59518e+06	2.11694e+06	-0.111054	0.35581	0.93583	512.558	83.9663	9.79068	3.27319	1.79868	1.10909	499.884	84.9817	10.2022	2.98631	2.15357	1.65538	475.971	80.2265	9.91168	5.15582	3.58848	5.42965	132.414	21.5829	5.53683	2.90791	1.79161	1.36418	145.597	24.2336	5.21096	2.65323	1.87039	1.48943	110.613	18.2746	4.04281	3.08592	2.28813
6	1	0	0.074074	0	1	0	0	0	28	1.85026e+06	2.28598e+06	0.144213	0.53528	0.883763	381.777	72.0376	9.25687	3.33299	1.76197	0.93052	386.07	74.6038	9.26681	3.01272	2.20844	1.75193	342.215	61.1465	7.78775	5.77701	4.3244	5.71665	101.336	22.0306	5.69992	3.07984	1.97842	1.28657	114.061	24.0327	5.02188	2.62029	1.88423	1.50312	80.9426	16.3442	3.59039	3.22775	2.54311
6	1	0	0.111111	0	1	0	0	0	28	1.74315e+06	1.99981e+06	0.037477	0.258612	0.919889	547.467	95.3043	11.3397	3.44487	1.58466	1.01022	523.391	95.8813	11.214	3.71479	2.4262	2.06586	540.409	88.8276	11.7067	4.74788	4.08978	5.70096	138.016	26.5116	5.68049	3.01302	1.8423	1.24493	150.111	28.333	5.11997	2.91428	1.94606	1.49791	128.419	21.619	4.35284	3.01636	2.2144
6	1	0	0.148148	0	1	0	0	0	28	1.18055e+06	1.56895e+06	-0.52476	-0.16265	0.946806	508.614	93.004	10.9733	3.04813	2.0242	0.97911	481.561	84.1239	9.75147	3.72168	3.08474	2.35842	486.022	94.0472	11.038	5.62573	4.6302	6.19162	125.611	25.1018	5.76604	2.63965	2.12042	1.35037	140.389	25.8492	4.97378	2.65229	2.27094	1.58309	111.62	22.0376	4.42404	3.24582	2.75043
6	1	0	0.185185	0	1	0	0	0	28	1.70867e+06	1.42313e+06	0.003646	-0.298533	0.941682	399.854	91.7578	14.1692	3.79552	1.96527	1.10165	371.918	87.5129	13.626	4.42527	3.14433	2.64643	400.025	89.7487	14.8984	5.59648	4.7569	6.25531	101.916	23.5493	6.42973	3.41941	2.25646	1.45842	106.934	25.7247	5.80824	3.4375	2.70345	1.8109	94.6088	20.8349	5.31396	3.36422	2.98418
6	1	0	0.222222	0	1	0	0	0	28	1.75007e+06	1.62588e+06	0.045362	-0.085981	0.948872	393.684	71.1376	9.31988	2.78475	1.97764	1.12108	415.092	77.5642	9.55911	3.691	3.34822	2.81746	352.509	62.5348	10.0736	4.88059	4.58812	5.74768	104.867	21.1826	5.84753	2.79815	2.07555	1.47119	123.963	23.8848	5.20482	2.82806	2.33433	1.97759	82.0972	16.7844	4.11802	3.048	3.03467
6	1	0	0.259259	0	1	0	0	0	28	1.80021e+06	1.15748e+06	0.0959	-0.544949	0.992736	259.261	51.5829	7.07478	2.92056	1.85372	0.9583	289.5	56.9587	7.61126	4.36357	3.84158	2.98225	229.207	46.735	7.33465	5.19928	4.13555	6.00606	74.1081	17.7363	4.92283	2.80006	2.05907	1.28197	86.0691	18.9706	4.20441	2.98073	2.43969	1.59138	60.7914	14.1699	3.61186	2.90438	2.45645
6	1	0	0.296296	0	1	0	0	0	28	1.61174e+06	1.19638e+06	-0.092325	-0.495907	0.967385	270.493	58.5276	8.27894	3.04192	1.81066	1.01735	306.718	66.3574	10.111	4.31157	3.67888	3.3081	237.534	49.5577	8.01632	5.44106	4.8863	6.94364	75.1358	20.5873	4.63972	2.98505	2.04024	1.29126	93.3072	23.0794	4.30989	3.27764	2.2156	1.73071	61.5424	14.3253	3.36068	3.0799	2.84472
6	1	0	0.333333	0	1	0	0	0	28	1.68499e+06	1.21268e+06	-0.018736	-0.469898	0.984296	304.208	71.7999	10.5312	2.87498	1.69298	1.20742	329.042	74.5424	12.3703	4.38656	4.34743	4.22085	263.072	61.9246	9.74487	6.14637	5.3376	7.80779	86.24	24.0004	5.58344	2.57423	2.00931	1.59977	100.085	24.7713	5.46206	2.64975	2.3743	1.94595	67.8216	16.919	3.90175	2.90502	3.01263
6	1	0	0.37037	0	1	0	0	0	28	1.44498e+06	1.99161e+06	-0.258612	0.319722	0.906198	366.936	74.3849	9.48976	2.69097	1.97214	1.18721	380.503	82.729	10.425	4.63744	4.94704	5.12995	345.509	63.5887	9.4672	6.27577	5.05374	7.88727	94.8514	21.0656	4.93247	2.42885	2.13639	1.506	111.766	25.5436	4.35705	2.68807	2.68698	2.16869	81.0215	16.3809	3.73343	3.13031	3.21313
6	1	0	0.407407	0	1	0	0	0	28	1.39478e+06	1.72443e+06	-0.308535	0.062533	0.895932	343.493	78.3895	11.2282	3.71377	2.26189	1.25292	328.744	77.7393	12.0623	6.91756	5.01525	6.22483	337.739	73.1052	10.4859	8.54231	8.6984	10.6456	82.7819	22.5022	6.08682	3.37409	2.71346	1.58459	94.5107	25.1244	5.81699	3.87704	2.85395	2.27073	75.2427	17.6493	4.35055	3.64051	3.83834
6	1	0	0.444444	0	1	0	0	0	28	1.48375e+06	1.30016e+06	-0.219262	-0.351844	0.894951	374.806	72.8886	8.88438	2.52659	1.86313	1.16464	424.164	82.0967	10.7684	5.3156	5.61657	6.77465	333.776	59.8531	9.71159	8.71745	7.34802	10.5167	98.3538	23.3322	4.60824	2.61434	2.00553	1.45469	121.761	26.9326	4.54737	3.11604	2.38308	2.08307	82.8061	16.7788	3.73678	3.29627	3.15918
6	1	0	0.481481	0	1	0	0	0	28	1.44771e+06	1.90177e+06	-0.254897	0.259098	0.947501	342.272	63.1452	10.3508	3.48325	2.01228	1.07664	347.362	68.8481	9.92405	6.67534	6.18414	6.86326	294.987	53.8565	11.2273	9.85439	9.65602	10.9497	95.5589	21.0224	6.1979	2.9514	2.13796	1.35058	107.745	23.3841	5.21332	3.3505	2.73922	1.91864	74.5037	14.9645	4.92422	3.25786	2.55741
6	1	0	0.518519	0	1	0	0	0	28	2.15099e+06	2.17234e+06	0.448679	0.539604	0.942935	628.03	123.324	17.4253	5.31516	2.5491	2.10796	635.339	123.279	19.0703	7.46564	6.80211	8.92818	659.157	114.072	16.8984	10.0024	8.48209	12.8599	181.326	34.7909	8.04202	4.25943	2.8976	2.49917	195.715	38.1047	8.11258	4.4292	3.46524	3.61014	177.969	30.4914	6.24031	4.14582	4.01454
6	1	0	0.555556	0	1	0	0	0	28	2.3821e+06	1.9366e+06	0.680042	0.313965	0.921097	370.187	99.444	13.9436	4.04769	3.34134	4.326	388.57	110.592	18.0941	7.39754	8.68586	15.3937	339.727	84.9726	15.3557	7.6702	8.97159	14.3239	100.666	28.1852	5.8739	3.46592	3.67249	4.68277	117.665	33.0173	7.02717	3.84828	5.8337	9.559	84.0159	22.0732	6.32872	5.351	9.02128
6	1	0	0.592593	0	1	0	0	0	28	1.30864e+06	1.3573e+06	-0.393055	-0.25575	0.950358	423.502	84.3418	14.7267	3.41433	2.03754	0.93126	470.608	96.6777	17.8439	6.44933	5.18675	5.49722	374.556	72.0629	14.4794	5.76755	5.66729	5.35923	119.6	22.919	6.84167	3.01267	2.30203	1.14518	140.165	27.4621	6.65232	3.13314	2.07863	1.29286	100.035	17.9311	5.02206	2.68626	2.22023
6	1	0	0.62963	0	1	0	0	0	28	1.08533e+06	1.12195e+06	-0.616124	-0.480887	0.918076	271.285	61.6004	10.4616	2.99562	1.61941	0.9947	309.48	69.1164	12.2689	5.41581	4.73269	5.62306	236.827	52.5764	9.58343	5.95052	5.59961	7.26233	80.7691	20.459	6.26199	2.61993	1.79399	1.16041	98.1036	22.6282	5.5768	2.33266	1.8485	1.32748	64.7294	15.2771	4.45861	2.47225	1.76233
6	1	0	0.666667	0	1	0	0	0	28	1.51813e+06	1.40768e+06	-0.182938	-0.18574	0.962615	433.433	92.3975	12.239	3.36323	1.99427	1.53957	484.229	103.103	14.9085	6.70028	6.69555	8.24273	380.605	75.3424	10.5401	7.58262	7.01391	9.97573	108.266	27.3939	6.37357	3.14115	2.13205	1.79392	133.562	31.0786	6.28898	3.45578	2.71396	3.29073	91.6383	20.883	4.43737	3.40815	3.47254
6	1	0	0.703704	0	1	0	0	0	28	2.01987e+06	1.18103e+06	0.318944	-0.401691	0.884333	466.436	105.083	13.568	3.31792	1.7303	0.9115	486.995	115.849	15.9883	6.37373	5.02052	5.447	431.815	88.6566	12.8946	7.99109	6.05796	8.49196	115.545	28.2547	5.84247	2.76343	1.82247	1.08143	134.371	33.8143	5.62214	2.80604	1.72044	1.27915	102.715	22.8414	4.35074	2.48603	1.96861
6	1	0	0.740741	0	1	0	0	0	28	2.49682e+06	1.61906e+06	0.796264	0.045896	0.915209	476.823	109.368	12.4872	3.13024	1.7448	0.89573	475.453	112.857	14.6208	5.96401	4.81523	5.78108	436.194	95.4617	12.9923	9.2949	6.95862	9.1009	122.816	30.3007	5.65901	2.58939	1.84585	1.07538	133.796	33.8088	5.23226	2.46368	1.84246	1.21753	105.217	24.1762	4.46883	2.25135	1.88149
6	1	0	0.777778	0	1	0	0	0	28	1.53508e+06	1.0778e+06	-0.165207	-0.485324	0.900696	305.844	65.046	6.42425	2.25962	1.84601	1.09593	344.619	67.0484	8.46828	6.14724	6.00233	7.42601	260.407	53.6053	6.22813	8.99379	6.97437	11.8456	86.0519	21.4323	4.22356	2.27189	2.01221	1.23819	103.225	23.2324	4.05655	2.26597	1.97199	1.51192	68.5539	15.7161	2.91617	2.60376	2.35341
6	1	0	0.814815	0	1	0	0	0	28	1.57587e+06	1.79976e+06	-0.124191	0.246863	0.866713	269.212	42.3668	6.63488	2.57667	1.63183	1.03261	321.369	52.0845	8.28194	7.45185	6.81804	7.75103	242.438	32.0287	6.77127	9.61316	7.9406	11.2475	76.8314	16.7578	4.99244	2.29701	1.85095	1.20073	93.5129	18.3695	4.30918	2.62328	2.09756	1.51309	65.0426	11.6798	3.74157	2.41424	2.34907
6	1	0	0.851852	0	1	0	0	0	28	1.55479e+06	1.38828e+06	-0.144955	-0.154791	0.872176	464.175	88.9301	9.13575	2.76451	1.73806	1.19947	524.45	94.3019	10.9232	8.15528	6.94191	9.21246	378.262	73.5302	8.99948	9.70223	8.19461	11.3971	130.245	27.5547	5.06754	2.60118	1.76872	1.32357	158.269	30.6115	4.58792	3.02033	2.01524	1.73659	94.9019	20.5487	3.46926	2.65751	2.24295
6	1	0	0.888889	0	1	0	0	0	28	1.94357e+06	1.73021e+06	0.244117	0.19707	0.868226	446.768	79.2544	9.98523	3.81218	2.12101	1.36409	496.911	86.8665	11.7747	7.79862	7.0357	9.28126	387.028	66.6855	10.3381	10.9629	7.4055	12.6112	112.017	23.4595	5.23639	2.87334	1.87739	1.52103	136.22	26.6218	5.29022	3.03324	2.29349	2.14949	92.0093	17.452	3.71084	2.92487	2.44157
6	1	0	0.925926	0	1	0	0	0	28	1.43225e+06	1.39269e+06	-0.26688	-0.130702	0.880638	374.485	77.9689	9.24876	3.26493	1.94843	1.21617	444.973	84.1432	11.325	6.8013	7.15353	9.22223	322.01	64.4208	10.1322	10.0476	8.35148	12.5263	104.913	24.7349	5.27998	2.79909	2.11478	1.5691	131.819	27.3641	5.38497	2.81713	2.40067	2.13824	80.5715	17.9919	3.94538	3.16337	2.77156
6	1	0	0.962963	0	1	0	0	0	28	1.98179e+06	1.76582e+06	0.282992	0.25218	0.893123	364.453	70.1682	10.8318	3.65641	2.27544	1.20026	373.441	73.4045	12.2452	7.644	7.16263	7.89107	336.202	59.7401	11.5538	9.18938	7.93334	11.8963	99.4289	23.1637	7.18726	3.2346	2.50529	1.46932	112.132	25.2497	6.47798	3.67276	2.97334	1.92878	87.2383	17.8233	4.9421	3.13255	2.79989
6	1	0	1	0	1	0	0	0	28	1.64535e+06	1.87681e+06	-0.053145	0.373033	0.895167	266.868	58.0868	7.52801	2.69372	1.71826	1.14168	326.357	67.2255	10.0588	7.13541	6.81527	7.96602	224.996	46.5503	8.20915	10.3269	8.44644	12.7394	78.9014	20.1808	4.32148	2.654	1.82935	1.37487	99.3253	22.4701	4.10792	2.8567	2.14808	1.79388	61.7678	14.5088	3.48226	3.39376	2.34494
6	1	1	0.037037	0	0	1	0	0	28	1.73921e+06	939485	0.025612	-0.399071	1.28109	303.659	56.3128	6.48055	2.38068	1.60282	0.93042	316.856	58.1885	6.77613	3.47348	2.8074	4.35079	271.976	49.6386	7.46865	4.97533	4.45591	5.58531	85.5992	19.228	3.97938	2.0066	1.68699	1.13178	93.3114	20.2934	3.62517	2.01275	1.92078	1.52495	72.4902	14.2775	3.01949	2.29691	2.22376
6	1	1	0.074074	0	0	1	0	0	28	1.61887e+06	1.06981e+06	-0.094916	-0.271267	0.815872	276.9	52.0606	7.04646	2.87276	1.90299	1.01941	282.587	53.9694	7.00536	4.11929	3.87128	4.93909	247.351	42.7861	7.56497	6.95747	5.65646	7.85218	85.2233	20.6948	5.05161	2.96962	2.17116	1.30109	94.1427	19.8259	4.52831	2.99858	2.29159	1.6531	66.3934	14.5964	3.59345	3.15173	2.76088
6	1	1	0.111111	0	0	1	0	0	28	1.61482e+06	968123	-0.098234	-0.380166	0.800258	162.789	21.163	3.73286	3.17492	1.49439	1.09161	151.659	19.9817	3.39687	4.72107	4.11768	6.16113	155.401	18.4521	4.43327	7.05713	5.65757	9.83504	57.4423	11.2846	3.6606	2.91793	1.56875	1.26695	55.5836	10.1753	2.72439	2.79025	1.81287	1.66855	47.956	8.36378	2.35834	3.14424	2.20196
6	1	1	0.148148	0	0	1	0	0	28	1.74055e+06	1.41838e+06	0.028233	0.062847	0.787684	194.756	27.7141	6.99712	3.23717	2.05205	1.02049	191.035	29.2743	6.68213	5.20187	4.8722	6.45499	168.343	22.4125	6.28405	8.13341	6.81394	9.76814	72.4527	12.3245	5.73411	3.41705	2.14025	1.2789	74.752	12.3492	4.77392	3.23478	2.57931	1.72557	55.7084	8.59947	3.81313	3.24533	2.42608
6	1	1	0.185185	0	0	1	0	0	28	1.07406e+06	1.17174e+06	-0.635615	-0.200609	1.69465	224.573	33.1382	6.82151	3.0053	1.99132	1.1583	290.513	36.9719	7.69647	4.81071	4.63436	6.07641	171.61	27.0635	6.93843	7.13794	6.73977	9.44214	72.6837	15.8718	5.65468	3.12722	2.19766	1.42327	99.8812	16.0636	4.82822	3.30041	2.8737	2.12764	48.0935	10.5111	4.20299	3.44711	2.58574
6	1	1	0.222222	0	0	1	0	0	28	1.00667e+06	968082	-0.70402	-0.402638	0.830814	194.931	40.2732	6.46307	2.86705	1.62591	1.03165	200.508	37.0705	6.81588	4.09269	3.97598	4.62667	172.694	34.4647	5.95823	8.82695	6.12027	10.8387	61.0739	17.557	4.55289	2.81864	1.80829	1.26702	69.4948	15.8976	3.99364	2.6725	2.06295	1.62093	48.72	12.8045	2.98621	2.89107	2.24974
6	1	1	0.259259	0	0	1	0	0	28	1.57347e+06	1.65808e+06	-0.136351	0.279453	0.882672	425.07	89.6711	12.4513	3.94924	1.75402	1.13138	448.693	97.6827	13.3349	5.12348	4.35285	5.02299	373.463	77.0464	12.8323	8.84198	7.72689	10.781	111.212	25.6796	6.66807	4.00948	2.18748	1.43136	133.221	31.0631	6.3184	3.64426	2.34789	2.02012	91.907	20.231	5.15942	3.94401	3.13267
6	1	1	0.296296	0	0	1	0	0	28	1.72909e+06	1.70514e+06	0.0201	0.31884	0.911402	174.19	23.5379	5.51078	3.02465	1.73933	1.11978	196.445	27.0535	5.99776	5.10689	4.41676	4.58697	139.495	18.2309	6.22935	7.92153	7.50572	10.6869	53.9299	12.7509	3.93844	3.16041	2.00258	1.40839	62.6353	12.0278	3.63435	3.19239	2.33219	1.79036	37.9638	7.55007	2.79999	3.61551	2.78876
6	1	1	0.333333	0	0	1	0	0	28	1.90635e+06	1.45547e+06	0.198112	0.061841	0.9074	276.74	39.7175	8.49739	3.33035	1.65671	1.05703	283.128	43.1649	8.45344	4.04454	4.22376	4.12515	251.735	33.7621	8.38904	7.53299	6.8949	10.3911	76.6055	13.4206	5.42401	3.65495	1.99473	1.31641	85.5308	14.4603	4.69247	3.32687	2.47995	1.86347	66.5366	10.3704	3.88603	3.63546	2.58099
6	1	1	0.37037	0	0	1	0	0	28	1.56415e+06	927298	-0.143436	-0.473116	0.851031	165.236	27.0134	6.19925	3.05493	1.56354	0.98329	167.11	26.4049	6.07093	4.86391	4.00112	4.80598	153.747	24.6649	6.87112	8.80571	7.78994	10.975	53.6581	12.4758	5.05491	2.82456	1.70098	1.24274	59.1198	11.2649	3.86307	2.71763	1.99625	1.54229	45.5923	9.09604	3.51056	2.84242	2.2173
6	1	1	0.407407	0	0	1	0	0	28	1.81529e+06	1.24001e+06	0.108654	-0.168668	0.937145	216.653	23.3727	6.42948	2.75637	1.85071	1.07932	185.471	20.2826	5.78049	4.88224	4.38338	4.78087	216.659	21.0858	6.23052	7.18548	7.1434	10.7884	55.8716	11.8152	5.2312	2.82607	1.85798	1.24065	56.372	10.1711	4.63724	2.96261	2.30549	1.83898	51.0913	7.83441	3.33724	2.89367	2.34274
6	1	1	0.444444	0	0	1	0	0	28	1.4133e+06	1.24403e+06	-0.289988	-0.185079	2.19102	131.897	28.0621	6.59531	3.78514	1.85995	1.1014	126.611	24.3119	5.41851	4.32575	4.56205	4.89695	126.945	24.8874	7.12833	9.56551	8.08923	10.633	46.2238	14.5083	5.32776	3.03736	1.91387	1.24532	45.9407	11.9263	4.1798	2.92608	2.3507	1.78461	40.2089	10.6157	3.54203	3.03212	2.27083
6	1	1	0.481481	0	0	1	0	0	28	3.11676e+06	1.91347e+06	1.41183	0.489183	1.01959	341.03	48.449	12.2967	4.48676	2.29304	2.45167	313.017	50.7259	12.5988	7.45656	7.92488	15.2826	354.125	44.8649	12.1632	6.27249	7.39514	9.38931	79.8174	16.4019	9.65003	4.60813	2.49615	2.78154	87.0674	18.3726	9.64212	5.62333	5.23558	9.79062	79.8293	13.544	7.46589	5.30216	4.7688
6	1	1	0.518519	0	0	1	0	0	28	1.72715e+06	1.22699e+06	0.026385	-0.22187	2.67141	497.701	112.829	12.4096	3.03027	1.9742	1.27977	424.932	99.1196	12.4374	4.4564	3.89734	3.82563	517.888	112.768	14.5612	8.23184	9.97685	12.0397	115.019	30.2727	5.53254	2.83667	2.20327	1.46987	123.751	32.1298	5.15528	2.66936	2.53812	1.84428	109.674	28.0282	4.27792	3.12878	3.19783
6	1	1	0.555556	0	0	1	0	0	28	1.80986e+06	1.42278e+06	0.106729	-0.01759	1.14861	404.321	76.4597	11.9187	3.79597	2.03746	1.20929	381.833	76.9292	12.6819	5.49351	4.44203	4.89179	377.462	67.992	13.6481	9.91363	9.06091	13.4207	104.307	23.2717	5.8528	3.38014	2.20207	1.52841	114.615	24.9769	5.21698	3.51015	2.70669	1.9542	87.2984	17.7374	4.50951	3.44943	3.24146
6	1	1	0.592593	0	0	1	0	0	28	1.32896e+06	1.39189e+06	-0.372957	-0.058137	1.36859	276.253	70.5669	10.3794	3.58673	1.89938	1.3545	283.003	69.6895	11.4186	6.40089	4.89788	6.02918	264.551	63.4412	10.0359	10.5442	8.49444	14.442	80.6123	23.0491	5.62307	3.29947	2.15086	1.66322	88.977	23.7324	5.40145	3.60931	2.66826	2.30474	69.2982	18.2077	3.86776	3.85945	3.13234
6	1	1	0.62963	0	0	1	0	0	28	1.38808e+06	1.72122e+06	-0.313714	0.267096	1.05376	232.225	47.6904	6.73992	2.71056	1.86582	1.13847	219.283	49.047	7.91681	4.77863	4.95807	6.30745	213.837	40.4391	6.57923	11.3306	9.22868	14.9626	72.3343	17.0176	4.77195	2.44784	1.85346	1.37729	72.3748	18.255	4.04527	2.74257	2.16185	1.82475	59.2932	12.5664	3.22113	3.10145	2.75696
6	1	1	0.666667	0	0	1	0	0	28	2.14547e+06	1.49031e+06	0.444303	0.029527	0.985634	305.95	36.9921	7.3228	2.77387	2.27172	1.31972	337.309	42.3319	7.98342	6.20898	6.51516	7.52211	261.627	32.0695	7.50849	9.20428	9.01355	14.6312	87.4293	13.7115	5.56776	2.92319	2.33564	1.50062	108.912	13.5998	4.76899	3.57739	3.11193	2.35133	69.3396	10.4019	3.90801	3.41918	3.07638
6	1	1	0.703704	0	0	1	0	0	28	1.97278e+06	1.79521e+06	0.277103	0.303177	3.27821	528.709	85.9476	12.5969	3.68335	2.1472	1.47855	445.713	86.0659	13.2145	6.07189	5.27819	6.31652	590.694	78.099	13.9966	11.0465	8.71321	13.8375	140.333	25.4482	6.20564	3.46423	2.54323	1.7718	137.885	27.6431	5.90988	3.84273	2.73564	2.40286	145.295	20.7278	4.99966	3.66474	3.53831
6	1	1	0.740741	0	0	1	0	0	28	1.71078e+06	1.52195e+06	0.012378	0.040169	1.58638	353.64	49.4423	8.69597	4.03609	1.95468	1.19827	347.383	52.8389	9.68818	5.83539	5.53657	5.67259	352.187	43.9465	9.28375	9.56793	9.35592	14.7719	94.6177	19.4108	6.55763	3.83287	2.2784	1.45976	100.088	18.898	5.8706	3.83768	2.60175	2.06412	86.4621	14.2417	4.60674	4.03678	3.02911
6	1	1	0.777778	0	0	1	0	0	28	1.56661e+06	1.19276e+06	-0.131903	-0.291941	1.1589	314.168	52.9642	7.72967	2.97925	1.71152	1.09171	310.05	54.2301	8.86031	4.79076	4.03787	4.38437	308.217	48.9044	8.81318	9.79386	8.99684	13.2332	87.2926	19.5791	4.92264	2.92925	1.86609	1.20655	96.0761	18.9913	4.01067	2.80052	1.93069	1.46346	80.2005	15.5541	3.63844	3.02475	2.66804
6	1	1	0.814815	0	0	1	0	0	28	1.59129e+06	1.41628e+06	-0.106592	-0.075099	1.09222	378.456	57.586	7.54964	3.19745	1.70038	1.0558	408.189	66.12	8.73522	4.91295	4.48125	5.24855	365.99	48.8497	7.80421	7.93768	7.68184	12.5379	103.726	19.6654	5.18114	2.96201	1.85021	1.26939	123.36	21.8866	4.81309	2.95357	2.07099	1.71473	91.1519	14.8572	3.6474	3.39056	3.03608
6	1	1	0.851852	0	0	1	0	0	28	1.61292e+06	1.53371e+06	-0.084335	0.035656	1.02596	225.859	25.1251	5.62664	3.38842	1.80397	1.22885	194.047	26.3773	5.47765	5.5847	4.70463	5.65874	241.022	21.6933	6.04488	11.1003	8.72694	14.5565	68.8032	13.3853	4.90877	3.12027	2.00067	1.41432	66.2829	12.2092	3.7956	3.08146	2.16265	1.91065	63.563	8.74048	3.71591	3.47427	2.80606
6	1	1	0.888889	0	0	1	0	0	28	1.4727e+06	1.34396e+06	-0.223818	-0.161329	1.01219	215.108	38.6032	8.32082	3.81126	1.97256	1.1553	222.196	39.2095	9.6967	5.9077	4.69085	5.45881	217.325	36.5183	8.70948	11.0595	8.86147	13.6086	71.0967	14.1913	5.6648	3.47532	1.98243	1.27639	74.4205	15.229	5.25314	3.50589	2.31447	1.78815	60.5596	11.4115	3.65401	4.09094	2.7048
6	1	1	0.925926	0	0	1	0	0	28	1.60659e+06	2.19939e+06	-0.08902	0.686049	1.07768	311.038	37.2397	7.83658	3.52449	2.07796	1.13336	376.866	41.6934	7.64226	4.99171	4.46262	4.29037	255.213	31.1716	8.1921	8.94355	8.34591	13.1415	86.0662	15.6888	5.97651	3.47414	2.23893	1.26906	113.762	15.7209	5.11434	3.59992	2.44932	1.63382	61.7078	10.6327	4.11269	3.32805	2.84809
6	1	1	0.962963	0	0	1	0	0	28	1.61625e+06	1.37916e+06	-0.077863	-0.145253	1.43367	348.141	69.8625	8.90531	3.34447	1.80051	1.02038	342.218	72.3429	11.0233	6.26758	5.35167	6.17338	336.761	65.3105	11.2381	8.72172	9.12856	12.1337	83.5596	18.895	4.38175	3.08537	2.02799	1.23339	92.7543	20.9525	4.09193	3.05453	2.36824	1.69194	77.7194	15.8992	3.42727	3.32983	2.91797
6	1	1	1	0	0	1	0	0	28	1.81292e+06	1.50724e+06	0.119423	-0.023786	1.36085	222.767	31.3616	6.43026	3.66772	1.98679	1.02162	245.298	32.9173	7.6406	5.5768	4.77467	4.53461	198.428	28.2849	6.84469	8.69883	6.4747	8.96961	64.3929	14.5901	5.07448	3.53729	2.36779	1.20884	72.6204	14.342	4.6642	3.5046	2.80166	1.62231	50.6327	10.1205	3.70392	3.51781	2.96892
6	1	2	0.037037	0	0	0	1	0	28	1.80568e+06	2.9812e+06	0.068857	1.40595	0.954188	519.566	92.9572	10.358	3.95482	3.64686	6.1047	749.004	109.816	13.4134	8.34072	16.5257	32.8032	440.885	83.8944	9.66693	4.69168	6.18122	10.6804	139.826	25.232	5.76427	4.1997	4.01253	7.07991	217.833	35.4323	7.85423	6.9141	12.2291	31.4369	95.8968	19.504	5.68191	5.32788	9.53145
6	1	2	0.074074	0	0	0	1	0	28	1.034e+06	1.61473e+06	-0.705303	0.048213	0.993354	324.708	70.828	8.93955	3.43831	1.55836	0.88753	311.596	66.2764	9.0703	3.66594	2.67718	3.49069	312.176	64.5283	6.8546	3.51316	1.86735	2.26496	86.1842	24.3573	5.69858	3.03573	1.63932	0.96371	95.8399	23.6298	5.10708	2.65004	1.75405	1.23499	74.1612	18.5308	3.82258	2.55201	1.31998
6	1	2	0.111111	0	0	0	1	0	28	1.28627e+06	992493	-0.455721	-0.564191	0.928215	370.743	77.5465	10.0385	3.05893	1.623	0.71519	350.546	72.6898	9.50073	2.56902	1.97493	1.12463	373.94	74.9836	8.87419	3.5869	1.72888	2.0916	94.2336	22.6636	5.53553	2.88481	1.7161	0.88338	97.6762	23.1318	4.5799	2.24073	1.55116	0.7272	87.9117	19.3695	4.07693	2.73068	1.45136
6	1	2	0.148148	0	0	0	1	0	28	1.24368e+06	782728	-0.500895	-0.764677	0.915757	127.438	20.528	4.55719	2.97383	1.65737	0.67443	141.744	22.7764	4.21067	2.49982	1.85667	1.01592	116.067	17.7604	3.40219	3.15089	1.5472	1.89783	39.8394	10.8235	3.84531	2.68854	1.72753	0.75315	45.6346	9.99013	3.17231	2.24823	1.63534	0.78973	31.6406	7.29387	2.48464	2.15108	1.25579
6	1	2	0.185185	0	0	0	1	0	28	2.39102e+06	983064	0.643899	-0.555261	0.922426	238.95	45.4285	7.05671	2.85764	1.56766	0.78069	263.917	51.7057	7.79884	3.14289	2.40715	1.99006	213.836	39.5545	5.9371	3.24121	2.16999	2.60253	78.2553	16.0683	4.14132	2.50844	1.65865	0.98514	88.5559	17.8894	3.86166	2.19649	1.66345	1.04189	60.1912	11.1882	2.67225	2.11511	1.50329
6	1	2	0.222222	0	0	0	1	0	28	1.74284e+06	1.06513e+06	-0.006956	-0.463464	0.86681	297.557	59.457	8.60457	2.66477	1.75294	0.83809	293.525	61.5865	8.87024	3.24773	2.45249	2.27327	297.468	56.7729	7.84276	3.57101	3.36682	3.62364	86.6209	18.7363	5.65607	2.30878	1.67524	1.0025	92.8342	19.5994	4.88976	1.96151	1.6748	1.04726	79.7895	15.6107	4.24658	2.34426	1.55164
6	1	2	0.259259	0	0	0	1	0	28	1.59849e+06	1.26667e+06	-0.153907	-0.252576	0.847283	90.6903	21.6043	4.85194	2.14409	1.52488	0.83976	89.8759	19.4722	4.21406	2.67493	2.77974	2.08789	83.5002	19.4017	4.44364	4.11564	4.77886	5.10334	32.6613	11.2652	4.44704	2.18563	1.50614	0.92371	33.707	9.77288	3.5179	1.85896	1.42562	0.97373	23.9855	7.2918	2.8531	1.96147	1.5546
6	1	2	0.296296	0	0	0	1	0	28	1.97073e+06	1.6542e+06	0.21579	0.144065	0.851725	306.035	62.0609	8.00807	3.82422	3.23254	4.64	355.828	66.9651	8.43718	9.38766	13.1395	32.8292	272.168	59.2379	8.76923	5.99867	6.44203	9.95942	81.0695	19.4326	4.67956	3.62096	3.39067	4.64715	105.905	22.2948	5.34315	8.03287	10.8847	24.146	65.0099	16.0726	3.99305	4.46986	5.61151
6	1	2	0.333333	0	0	0	1	0	28	1.71257e+06	1.51237e+06	-0.039417	-0.016456	3.52398	340.03	60.8547	8.71519	2.85975	1.77597	1.03127	336.604	64.93	8.93253	4.07297	3.94447	5.3422	330.344	54.8743	8.31152	4.05661	3.95501	4.77625	87.2865	19.3762	4.81418	2.76274	1.79288	1.17507	96.4738	20.0615	4.58765	2.56125	2.44389	2.51876	77.4738	14.7981	3.72848	2.61062	1.85277
6	1	2	0.37037	0	0	0	1	0	28	1.47222e+06	1.05374e+06	-0.287731	-0.438638	0.903031	296.504	55.332	8.75545	2.99789	1.64025	0.85761	305.618	57.5106	9.43135	3.84743	3.33856	3.20842	269.686	50.5755	8.76522	4.52934	4.50272	5.21631	75.3206	18.2171	5.51607	2.54837	1.72777	1.00272	87.6968	18.6536	4.98057	2.35893	1.77359	1.18267	61.8962	14.0353	3.96572	2.14051	1.70384
6	1	2	0.407407	0	0	0	1	0	28	1.74628e+06	1.53213e+06	-0.016188	0.048663	0.926588	263.322	70.7894	9.77589	2.8874	1.70752	0.92316	278.972	75.3537	10.5834	4.89605	3.77349	4.20161	240.38	63.1528	9.64426	5.40157	5.27282	6.69333	69.8499	21.0511	5.49137	2.60506	1.85676	1.1117	79.0649	22.8124	4.74442	2.44373	1.79664	1.28338	58.9585	16.4126	3.95767	2.62497	2.22581
6	1	2	0.444444	0	0	0	1	0	28	2.15256e+06	1.81161e+06	0.387483	0.337571	0.899424	627.65	122.965	14.9929	3.38372	2.10614	1.11741	587.024	119.162	15.2845	4.9906	4.026	3.95916	608.388	120.137	15.1756	5.16524	6.24371	6.89856	148.653	31.0426	6.91746	2.84502	2.22035	1.3246	164.784	33.733	6.35225	2.45543	2.33851	1.47703	129.384	26.4759	5.1242	2.76232	2.23478
6	1	2	0.481481	0	0	0	1	0	28	2.09756e+06	1.59348e+06	0.329871	0.128883	0.871769	276.527	63.727	11.1125	3.2145	2.71658	3.12562	293.596	71.2638	13.5462	5.6859	9.04411	18.4387	252.866	56.7451	10.7928	5.68203	6.88425	10.4629	79.1225	19.6296	6.36428	3.14266	2.82235	3.54948	90.1009	21.5446	7.77618	5.25878	6.78925	14.8532	64.024	15.6408	5.31697	3.41297	6.3055
6	1	2	0.518519	0	0	0	1	0	28	1.88766e+06	1.49979e+06	0.117399	0.044373	0.868552	307.477	54.9752	7.25792	2.99238	1.74071	0.85517	364.236	61.6127	8.43964	4.70489	3.14356	3.3697	274.925	47.6933	7.553	5.59555	5.05827	5.59725	86.459	18.2484	4.54164	2.94913	1.87307	1.03215	109.688	20.4301	4.19066	2.85259	1.94697	1.19498	66.2355	13.6038	3.27497	2.66188	1.92658
6	1	2	0.555556	0	0	0	1	0	28	1.80831e+06	1.14279e+06	0.035533	-0.30368	0.887645	272.817	44.9756	7.12825	3.2292	1.58838	0.85639	300.974	48.7666	7.81248	4.52053	3.82651	4.40523	247.404	39.8115	7.10899	6.52761	4.83666	6.06371	78.0967	16.581	5.31951	3.00877	1.76493	0.98647	89.8793	17.2854	4.33472	2.53705	1.91622	1.26214	62.645	12.5425	3.64457	3.13887	1.96154
6	1	2	0.592593	0	0	0	1	0	28	1.70849e+06	1.01679e+06	-0.066866	-0.420444	0.879293	203.865	30.1741	4.7608	2.00572	1.65907	0.83006	206.927	30.8849	5.26059	3.18872	3.72868	2.94755	180.773	28.0444	4.34331	6.10263	4.82228	6.68435	64.5959	13.1014	3.42845	2.02305	1.66791	0.98476	70.0452	11.4905	3.00116	1.92467	1.85886	1.11927	52.1038	10.1853	2.41286	1.95131	1.47755
6	1	2	0.62963	0	0	0	1	0	28	1.78457e+06	1.16501e+06	0.00667	-0.263123	0.884568	237.141	37.3722	7.34513	2.72624	1.80147	0.92002	238.118	31.6135	6.72798	3.91149	3.48546	3.59249	232.02	37.847	7.32274	6.0975	5.93421	7.54066	66.8934	15.9145	5.56742	2.6666	2.07087	1.12631	74.6158	14.1768	4.83078	2.45194	2.07576	1.4805	57.2176	12.3891	3.90607	2.4593	2.33027
6	1	2	0.666667	0	0	0	1	0	28	1.4067e+06	1.25968e+06	-0.373787	-0.15917	0.871844	372.38	80.8469	10.4642	3.01686	1.78114	1.04932	334.732	74.0466	11.9036	5.35304	3.89439	4.71538	403.412	82.2951	10.9182	8.74586	6.01183	9.83555	96.7057	25.5715	5.29811	2.96021	2.06636	1.27165	102.99	25.2682	4.9804	2.7396	2.09126	1.47858	92.444	22.5568	4.2291	2.85043	2.63998
6	1	2	0.703704	0	0	0	1	0	28	1.96119e+06	1.60431e+06	0.178187	0.1944	0.892003	246.231	49.5186	7.68311	2.95427	1.78426	0.91787	238.718	45.7321	8.24087	4.72325	4.15787	4.37598	245.417	46.9251	8.57048	8.45205	8.15474	10.9305	70.1274	17.7471	4.88891	2.86917	1.90182	1.13926	75.2962	15.8693	4.30271	2.50769	2.07794	1.36454	64.0129	13.9373	3.60751	2.87919	2.10639
6	1	2	0.740741	0	0	0	1	0	28	1.68168e+06	1.2814e+06	-0.103904	-0.119251	0.881304	331.293	72.9288	8.35589	2.74483	1.68712	1.02287	301.69	65.8533	8.73833	4.50467	4.16662	4.42134	367.407	75.3421	9.32156	8.95519	7.79116	11.7158	86.967	22.4202	4.06331	2.63581	1.71779	1.29057	91.6143	21.3246	3.70417	2.47972	1.95641	1.53188	87.673	19.8272	3.53723	2.7843	2.3137
6	1	2	0.777778	0	0	0	1	0	28	1.78257e+06	1.53247e+06	-0.005537	0.140796	0.897686	276.552	47.4461	7.4686	3.45555	2.1256	1.10087	238.612	45.516	7.44547	5.35468	4.6243	4.91679	287.726	46.5143	8.40176	11.1948	10.1639	13.7469	83.986	15.9931	4.69824	3.15255	2.29541	1.39122	83.4004	17.2719	3.86347	3.24823	2.38317	1.80214	77.8479	12.988	3.6303	3.47388	2.80018
6	1	2	0.814815	0	0	0	1	0	28	2.06895e+06	1.7129e+06	0.278276	0.330438	0.891577	378.909	69.1039	11.1792	3.78587	2.51326	1.11278	409.481	72.1095	12.6104	5.71852	5.13174	5.03823	380.91	63.9821	11.8019	9.80265	9.14658	12.6068	98.4839	20.481	6.02791	3.71156	2.70893	1.37799	116.007	22.325	5.77919	3.8197	3.09497	1.904	94.6949	17.5646	4.43866	3.81307	3.0246
6	1	2	0.851852	0	0	0	1	0	28	1.76664e+06	1.61756e+06	-0.026641	0.244481	0.869784	295.678	50.1705	7.98379	3.718	1.83147	1.03	305.424	52.2261	9.03267	5.3783	4.216	4.37848	268.426	44.7884	8.32083	8.505	7.87142	11.4495	88.948	16.7117	5.41285	3.38553	1.99007	1.25454	97.1632	17.0852	4.69321	3.50964	2.32319	1.78306	72.0701	12.1322	3.89426	3.33974	2.47643
6	1	2	0.888889	0	0	0	1	0	28	1.45314e+06	1.31919e+06	-0.342698	-0.044754	0.870521	409.075	86.5201	9.63777	2.49403	1.70639	1.03643	391.208	82.9176	11.7614	5.16376	4.64812	5.08161	395.248	80.0786	10.5188	9.00131	8.25356	13.2662	100.749	25.4209	5.00208	2.43357	1.97782	1.22356	111.598	26.6906	4.78115	2.42548	2.15433	1.70908	92.3827	21.7647	3.94737	2.91705	2.46676
6	1	2	0.925926	0	0	0	1	0	28	1.89891e+06	1.31989e+06	0.10051	-0.034894	0.869661	262.88	51.0601	7.90681	2.96045	1.84006	1.06842	258.075	52.8204	9.42866	4.97585	4.96837	5.48737	244.202	45.1954	8.2043	11.2256	8.51561	13.289	81.2726	16.545	5.00058	2.77817	1.80082	1.28648	86.0331	17.3855	4.42902	2.62663	2.18676	1.8258	67.3162	13.3058	3.84292	3.29199	2.49544
6	1	2	0.962963	0	0	0	1	0	28	1.78736e+06	1.21819e+06	-0.013569	-0.127584	0.883519	285.395	48.5432	7.05361	2.71474	1.81011	1.0099	298.428	50.8693	7.63196	4.50461	4.83191	4.97771	263.544	42.9959	7.79598	11.4911	8.52597	12.1951	83.2257	17.0407	4.84954	2.63814	1.92594	1.19559	91.5736	17.6642	4.14675	2.55145	2.1454	1.57878	72.7394	13.1935	3.72574	3.08148	2.20557
6	1	2	1	0	0	0	1	0	28	1.8443e+06	1.55974e+06	0.040805	0.223154	0.879427	341.386	56.6392	8.45346	3.5901	1.88321	1.11494	330.399	54.0854	9.09048	5.93088	5.35851	5.56257	311.608	49.8798	8.88249	11.2911	8.7554	14.0162	101.97	19.9345	5.21836	3.7669	2.09721	1.40012	108.73	19.9198	4.38865	3.67427	2.42676	1.94483	85.6683	15.0472	4.10944	3.90661	2.62281
7	0	0	0.037037	0	1	0	0	0	28	6.43133e+06	5.59371e+06	1.80402	2.37506	1.24764	1352.91	215.579	35.5982	7.67186	6.81385	9.65646	1043.69	203.563	29.0962	9.63314	15.9339	32.3303	2060.91	236.888	41.7906	9.38199	13.9584	20.0289	271.646	41.5014	17.0707	7.26441	9.58924	11.7152	222.598	54.2291	23.8258	22.4911	60.5233	130.073	423.189	46.423	20.2187	11.9571	35.4227
7	0	0	0.074074	0	1	0	0	0	28	2.04013e+06	3.29354e+06	-2.49328	0.148047	1.21408	793.587	107.175	19.2384	5.60044	6.90067	10.7245	648.166	99.7524	16.6547	8.82399	21.0313	50.6272	909.779	108.146	20.1047	7.9517	18.6818	30.6398	201.354	32.0821	14.8584	7.35102	11.9471	18.1283	180.151	41.5309	17.4312	36.4742	113.458	206.934	240.798	35.3707	16.5591	13.8572	40.4598
7	0	0	0.111111	0	1	0	0	0	28	3.70253e+06	3.58142e+06	-0.736901	0.508677	1.21907	1180.82	90.114	21.4193	4.99519	2.62923	1.42965	942.193	88.3598	17.9264	4.59111	3.3867	2.9308	1506.58	96.5236	19.4344	5.38279	3.57228	2.92671	283.609	23.912	13.5969	6.11135	4.21529	2.3951	237.776	21.0734	8.39071	3.69121	4.16186	3.97512	334.661	22.6991	11.504	4.79919	4.80914
7	0	0	0.148148	0	1	0	0	0	28	2.09888e+06	3.16622e+06	-2.24664	0.166561	1.19249	643.989	59.3898	18.9922	4.8503	2.89207	1.01992	566.54	57.5302	12.6022	4.16432	3.16427	1.89238	793.664	65.1307	18.0176	4.99065	4.25103	2.61097	131.42	21.8375	21.602	6.27591	4.79384	1.61646	130.216	16.0243	10.2454	3.67596	2.09899	0.94428	158.695	20.2482	19.0822	5.27306	3.71093
7	0	0	0.185185	0	1	0	0	0	28	4.50976e+06	3.72026e+06	0.258285	0.792991	1.233	265.995	45.7093	18.2929	4.33235	3.25338	1.61372	234.159	43.504	12.1585	4.07291	3.51111	3.04079	360.979	49.7418	14.0273	5.23339	5.82798	4.95083	71.8081	18.8133	18.8556	5.77865	5.21313	2.74128	57.4561	12.2697	9.17447	3.79252	4.26634	5.47977	85.2264	15.2968	14.2078	6.98803	8.0361
7	0	0	0.222222	0	1	0	0	0	28	5.26959e+06	3.22291e+06	1.11202	0.368701	1.20877	411.625	60.6688	14.3216	4.75336	2.81407	1.27295	374.77	59.9775	11.3091	4.20622	2.7994	1.73653	527.372	61.2953	14.346	5.57824	4.37157	3.23451	110.792	23.6744	12.9239	5.01365	5.41984	2.24798	96.5357	19.1205	8.08763	3.312	2.61332	1.99466	111.783	18.7129	10.4349	4.48408	4.54234
7	0	0	0.259259	0	1	0	0	0	28	7.36424e+06	3.88928e+06	3.30058	1.10817	1.17981	320.779	59.7125	19.6262	4.15948	3.01617	1.48376	274.808	55.1849	14.1209	4.27296	3.27111	2.96031	407.854	55.4642	18.5861	4.33322	4.15238	3.2908	109.788	23.1124	16.1661	4.6885	4.67649	2.22917	85.4696	17.596	8.88296	4.04779	4.04716	3.70961	117.01	18.9711	13.4336	3.83937	4.49757
7	0	0	0.296296	0	1	0	0	0	28	9.5602e+06	3.447e+06	5.59047	0.738907	1.15998	428.025	53.1938	17.8958	4.71087	2.87542	1.21418	393.138	48.9901	14.7276	4.16984	2.75064	1.54246	489.819	53.0657	15.9586	5.85648	4.21559	3.09204	109.242	21.2693	17.1831	5.99731	5.12798	2.10432	105.261	15.1614	10.5806	3.47085	2.30101	0.97821	103.703	17.5192	13.2459	5.38619	3.58527
7	0	0	0.333333	0	1	0	0	0	28	4.45238e+06	1.54765e+06	0.576651	-1.08782	1.17797	219.077	52.3111	17.7253	4.50884	3.0066	1.7644	262.576	53.0503	14.7191	4.4488	2.85363	2.4604	252.374	52.5344	21.3764	5.1939	4.55015	3.44215	76.1148	18.3484	15.9867	5.98025	4.94817	2.6712	83.8109	15.4567	8.7673	3.36858	2.85747	3.02209	72.8565	15.7678	15.1839	5.05879	4.56422
7	0	0	0.37037	0	1	0	0	0	28	4.16894e+06	2.22814e+06	0.387092	-0.334141	1.14124	340.132	48.8703	12.9059	3.45167	2.76286	1.24183	529.178	50.5968	10.9822	3.248	2.36323	1.66522	529.027	50.3848	13.9379	4.0563	4.81157	3.7809	103.09	21.164	12.6858	4.06808	4.65901	2.10821	143.505	16.4772	7.79292	2.24758	2.02235	1.10021	127.368	17.9075	12.6668	3.13383	3.71526
7	0	0	0.407407	0	1	0	0	0	28	4.12687e+06	1.94661e+06	0.43905	-0.543177	1.17083	438.138	44.0973	13.4575	4.15711	3.49978	1.80103	387.477	37.3462	9.32285	3.34933	3.18387	2.1938	602.339	47.5031	12.3776	4.96431	5.81258	4.68926	87.1037	18.1953	12.0383	5.2501	5.90343	2.66776	95.0165	12.5762	7.32655	3.0497	2.70864	1.97454	109.032	16.5636	10.8301	5.59617	8.71185
7	0	0	0.444444	0	1	0	0	0	28	2.65509e+06	2.16863e+06	-0.938927	-0.247512	1.09067	345.352	35.8535	15.0478	4.44346	2.76036	1.22233	387.165	38.194	11.6032	4.23196	2.67743	1.85949	355.821	32.1103	13.4317	4.57788	4.72153	3.3959	86.5038	19.1385	17.1375	5.64737	4.50966	1.92594	95.3992	13.6787	10.5804	3.34257	2.27086	1.12006	78.7101	15.1892	12.7458	4.7521	3.78582
7	0	0	0.481481	0	1	0	0	0	28	2.47629e+06	1.47527e+06	-1.02384	-0.867708	1.05634	172.554	28.1766	12.4423	5.36535	4.65264	5.51842	192.846	25.0674	10.3528	6.57116	6.76023	13.9111	272.024	31.9118	12.7115	6.89568	12.4692	18.8601	51.6829	18.9091	15.0155	7.8158	8.06901	8.10521	63.0331	14.4659	13.035	13.7512	24.689	53.3364	61.7158	18.3773	17.9989	12.8176	22.4056
7	0	0	0.518519	0	1	0	0	0	28	3.23239e+06	1.9646e+06	-0.173713	-0.305863	1.0849	666.686	55.5978	22.3641	4.95065	3.10351	1.31654	642.741	49.4776	13.9936	4.25985	2.68405	1.60755	616.138	46.3262	18.2301	5.2591	4.92843	3.34455	183.359	26.302	19.9721	5.74319	5.76656	2.06283	171.78	16.0316	7.78752	3.17282	2.13418	1.32049	170.633	21.0226	15.042	5.25933	4.11517
7	0	0	0.555556	0	1	0	0	0	28	5.74497e+06	2.51496e+06	2.43285	0.317247	1.09034	402.686	30.7255	14.7258	5.50441	4.74765	4.09043	563.393	23.0732	10.5366	7.36074	8.14942	12.1186	368.325	29.9465	11.7143	6.77565	9.6034	11.9404	110.794	27.0796	18.2815	6.63832	8.98162	6.81548	146.396	12.9156	10.2219	22.4721	21.8504	47.1985	98.6928	21.5544	15.3769	9.20519	24.3082
7	0	0	0.592593	0	1	0	0	0	28	2.87787e+06	1.6967e+06	-0.340201	-0.428671	1.13434	325.64	65.0136	18.4578	5.37136	2.63883	1.69604	295.483	63.1097	15.4591	5.61767	4.825	8.29018	461.821	64.326	19.5374	6.03181	4.84383	4.14942	84.6282	23.7193	15.7586	6.67499	4.69043	2.55211	86.0462	18.5747	9.31948	4.08388	3.00563	2.90952	102.222	19.8015	11.9504	5.07779	4.19871
7	0	0	0.62963	0	1	0	0	0	28	1.1592e+06	1.89372e+06	-1.96502	-0.158259	1.07861	415.402	84.9847	18.4215	4.9415	2.56864	1.47973	403.919	64.1392	13.5887	5.66374	5.60437	6.6366	921.698	118.911	23.8818	7.67357	5.60947	6.01645	98.3113	24.5935	13.4439	5.14576	4.03227	2.32622	107.02	17.4084	7.94745	3.43948	2.82545	3.49987	165.365	28.0181	14.0298	5.31369	5.09009
7	0	0	0.666667	0	1	0	0	0	28	1.30406e+06	832970	-1.72618	-1.14627	1.08485	178.93	29.8429	10.7961	3.73503	3.07424	1.0243	212.398	24.478	8.00783	3.27133	2.66132	1.49334	243.808	32.1044	10.0406	4.06736	4.98322	3.14438	53.6458	20.1462	11.1511	4.37909	4.83571	1.62312	55.0924	11.1635	6.61535	2.5468	2.06125	0.9216	59.1269	15.8756	10.5133	3.46794	4.12451
7	0	0	0.703704	0	1	0	0	0	28	1.82729e+06	819886	-1.10881	-1.0874	1.16692	185.209	34.1812	11.475	4.51907	3.83333	1.74445	214.16	22.8538	8.65131	3.98612	3.50813	2.11565	204.104	32.1482	12.1678	5.13955	6.02664	4.60361	47.004	22.788	16.7287	4.69855	6.64919	2.21302	49.3292	11.0057	10.3162	3.41183	4.07205	3.33759	45.8974	18.1495	18.0473	4.07591	6.56293
7	0	0	0.740741	0	1	0	0	0	28	1.99152e+06	1.13652e+06	-0.85066	-0.697758	1.14759	140.684	27.5245	11.4562	4.69986	4.03009	4.48642	146.193	24.1609	7.65629	4.98031	6.31565	10.9251	192.404	30.095	12.7344	6.17543	11.5816	13.2508	49.8082	19.3572	13.6996	6.08931	6.7257	7.7629	50.3989	10.6334	8.83028	12.302	22.3375	63.8453	54.186	15.8301	11.8488	11.0694	26.4499
7	0	0	0.777778	0	1	0	0	0	28	2.08281e+06	1.64446e+06	-0.6654	-0.117085	1.15418	207.203	34.6617	12.1079	5.29985	3.89287	1.90547	276.301	25.6795	8.52678	4.44393	4.06772	3.80577	205.784	31.1951	10.1644	5.89783	7.36188	6.71035	70.3125	24.0063	15.4182	6.52728	6.97803	3.00633	68.926	13.2005	9.30522	5.24028	6.67414	7.70947	60.8064	19.6851	13.6712	7.89188	10.3126
7	0	0	0.814815	0	1	0	0	0	28	3.45709e+06	1.68063e+06	0.80287	-0.008201	1.16359	643.207	71.5535	20.1699	7.04027	5.77393	5.2768	617.476	63.2973	18.7576	11.2536	18.6627	31.5343	799.28	73.497	26.0097	9.73644	17.0676	18.1781	157.119	27.7472	19.0603	7.55836	8.82719	8.98951	154.087	22.1817	15.2563	15.9243	58.2834	102.432	176.389	25.2763	17.3637	14.8122	32.6701
7	0	0	0.851852	0	1	0	0	0	28	2.61433e+06	1.14417e+06	0.05403	-0.471659	1.14456	168.136	34.3773	13.7723	4.43198	2.9044	1.17426	149.711	29.802	8.26162	4.05922	2.70579	1.80219	228.877	32.7499	13.5219	5.79084	5.21372	3.45824	54.3785	18.2637	14.2653	5.5115	4.90817	1.86443	46.3129	10.7813	7.12787	3.66075	2.77857	2.33668	61.7765	14.9828	15.429	5.38286	4.73773
7	0	0	0.888889	0	1	0	0	0	28	2.43367e+06	1.13832e+06	-0.0325	-0.405515	1.22277	328.631	39.7105	13.5141	5.37167	2.83954	1.35665	351.986	35.8873	10.165	4.92441	2.79054	1.77677	359.985	41.2648	12.3232	6.03935	4.50561	3.59846	103.77	23.1845	14.5853	6.27465	4.75186	2.00008	96.8117	15.3255	8.32219	4.13445	2.25366	1.58324	100.302	18.4028	12.7382	5.43258	3.74141
7	0	0	0.925926	0	1	0	0	0	28	1.8246e+06	1.16283e+06	-0.547753	-0.307447	1.15104	306.416	26.0382	9.3647	3.7523	3.9987	2.56869	325.658	19.8739	6.68518	4.48232	6.39743	8.25359	337.017	20.5643	7.9836	5.50266	8.99212	12.0922	89.8254	23.9045	11.7373	5.40359	8.24903	3.61424	86.6604	12.3071	6.18266	5.47894	12.8037	15.3596	85.6097	17.6786	12.126	9.2521	19.6887
7	0	0	0.962963	0	1	0	0	0	28	2.11069e+06	1.77611e+06	-0.167722	0.378758	1.13891	480.876	77.8886	22.8458	7.39865	4.36298	4.23852	551.572	73.0046	14.9569	7.61238	7.75005	10.0517	564.758	72.6365	19.7792	9.43933	8.37657	13.3442	129.375	30.6989	20.9627	7.83864	7.2094	6.51036	143.12	23.8924	11.1614	9.15406	20.5691	41.8383	134.195	27.4995	17.4352	12.2219	19.691
7	0	0	1	0	1	0	0	0	28	1.97533e+06	2.65664e+06	-0.209237	1.33267	1.0839	252.095	44.7004	14.3125	4.54541	3.26391	1.17545	319.191	46.8507	13.2385	3.9303	2.85248	1.53422	282.537	40.919	10.5657	4.35823	2.65805	1.27268	76.1567	18.4013	14.8753	4.94709	5.52409	1.96698	94.4938	13.8585	8.99172	2.63198	2.62638	1.17589	72.6595	14.4177	13.4111	4.00618	4.55652
7	0	1	0.037037	0	0	1	0	0	28	1.90453e+06	2.17138e+06	-0.574375	0.463745	2.05346	160.86	40.915	13.5835	4.19255	2.69027	1.15823	191.643	38.1734	13.2388	3.82817	2.28516	1.63157	197.395	36.2027	14.7373	4.25238	2.59054	1.40204	58.6833	18.918	11.881	4.91516	4.74176	1.90867	56.3779	12.9151	8.88596	2.99533	2.58726	2.3252	59.6173	15.8789	12.205	5.21965	5.37634
7	0	1	0.074074	0	0	1	0	0	28	3.0399e+06	1.63269e+06	0.554325	-0.052309	1.71568	150.752	35.4893	12.2341	3.68629	2.78479	0.97202	137.81	28.221	8.49778	3.19824	2.0397	0.90871	179.61	31.6102	8.91869	3.66335	2.36202	1.0321	53.3746	19.9205	14.8243	4.26094	4.69746	1.69415	43.9821	11.1746	6.48694	2.57455	1.81056	0.78221	54.1534	15.1913	16.5015	3.70317	4.32745
7	0	1	0.111111	0	0	1	0	0	28	1.89023e+06	1.66361e+06	-0.601122	-0.0033	1.81436	732.987	79.8432	18.2452	7.4474	6.05108	6.7484	626.776	74.493	17.8015	11.3793	18.6626	29.581	1261.08	86.1863	16.2617	11.3623	12.3494	28.7129	171.894	28.979	15.8789	10.6646	11.1962	11.8953	168.779	24.8719	19.7933	38.8762	80.0183	147.435	281.653	27.2771	14.7543	19.08	39.8979
7	0	1	0.148148	0	0	1	0	0	28	4.25103e+06	1.55497e+06	1.75329	-0.090821	1.62148	309.544	47.486	10.9721	4.18341	3.14848	1.27008	240.143	40.7552	10.6645	3.53054	2.60173	1.16437	408.659	48.1245	11.341	4.04194	2.57902	1.22672	79.3103	19.3184	12.2402	4.62857	5.04406	1.96469	59.6599	12.8718	10.9521	2.9172	2.40878	1.03016	89.6131	16.3468	11.2366	3.53765	3.83984
7	0	1	0.185185	0	0	1	0	0	28	2.17882e+06	1.48506e+06	-0.320393	-0.164358	3.80541	440.591	82.6249	18.8702	6.32895	4.34967	3.91203	528.817	61.6227	14.286	7.27932	5.74118	7.97668	633.263	93.4944	18.7083	5.77479	6.46059	6.3805	122.931	33.1581	16.343	7.33606	6.44957	6.91549	155.296	19.6528	10.4683	15.5655	13.6047	25.1803	146.41	27.6459	15.0227	8.63393	11.9869
7	0	1	0.222222	0	0	1	0	0	28	1.54879e+06	1.51987e+06	-0.960069	-0.091883	2.02424	665.139	65.2476	25.8022	5.19167	3.70746	3.23748	572.222	53.7132	18.6375	6.23142	5.65331	10.3979	704.019	62.7862	21.3117	6.03578	5.71577	7.09415	205.618	29.5237	22.1395	6.58333	6.02318	5.70606	197.371	24.4066	19.366	9.10847	23.3494	55.9408	214.534	29.1173	21.399	8.0877	11.6644
7	0	1	0.259259	0	0	1	0	0	28	5.21546e+06	1.29687e+06	2.70042	-0.294784	1.92966	598.855	73.9381	23.982	5.71717	3.10467	2.03323	432.333	62.7695	16.4255	4.51929	2.72193	2.20846	801.918	78.008	22.2817	5.84819	3.24492	2.76015	146.475	22.7164	20.3249	6.75696	5.20323	2.73187	105.972	16.8058	9.94694	3.99132	3.21246	3.20641	178.255	20.9287	15.0685	5.47396	5.5984
7	0	1	0.296296	0	0	1	0	0	28	3.97935e+06	1.93078e+06	1.4583	0.358394	1.91491	614.229	122.97	20.0216	5.78307	3.56018	2.85956	567.021	103.194	17.2653	6.97058	7.19073	11.7533	791.273	125.365	22.2758	4.506	4.31646	4.36092	122.863	30.8225	15.2303	6.31737	5.23009	4.57627	125.51	24.6348	10.2876	8.17084	20.0741	38.537	144.531	28.6962	15.0934	5.80019	8.81948
7	0	1	0.333333	0	0	1	0	0	28	1.07985e+06	1.07178e+06	-1.44715	-0.481608	1.926	177.811	41.4875	12.1374	3.11665	2.41231	0.91108	162.686	35.6389	9.21307	2.64439	1.88439	0.91606	226.455	42.2912	11.5157	3.16516	2.34939	0.98463	66.1801	19.207	10.7924	3.27175	3.86234	1.60731	52.2741	12.4122	6.017	1.93579	1.78414	0.76549	65.2555	14.5761	11.0452	2.87497	3.41438
7	0	1	0.37037	0	0	1	0	0	28	1.06504e+06	1.0593e+06	-1.4679	-0.475182	1.94633	179.994	41.9226	12.1832	3.46985	2.31428	1.05378	159.022	36.7415	8.56424	2.87718	1.76468	0.95958	236.794	42.6192	9.42207	3.1751	2.06225	1.07418	56.0452	17.5061	13.6185	4.51142	3.95943	1.6807	46.7434	11.8612	6.87922	2.47446	1.75698	0.79337	62.5638	14.5102	13.0235	3.60502	3.7377
7	0	1	0.407407	0	0	1	0	0	28	1.9047e+06	1.789e+06	-0.632628	0.265572	2.72026	621.961	79.6266	24.3298	7.24947	5.6623	7.39328	506.259	69.187	18.888	9.55804	8.48538	23.5257	1009.09	97.0068	27.2798	9.66389	8.78473	15.3741	170.571	28.143	19.1644	8.08645	8.51674	10.8036	157.32	21.7524	15.6345	20.3313	33.4067	61.1549	224.555	30.1687	22.8579	17.1882	27.4293
7	0	1	0.444444	0	0	1	0	0	28	1.60806e+06	1.98676e+06	-0.936013	0.486285	2.35141	360.986	61.3646	22.3155	4.51397	2.7319	1.0216	285.063	52.9453	15.0698	3.70253	2.28436	1.12771	443.385	59.8217	16.1369	4.32973	2.48616	1.15125	92.5009	21.0677	19.1253	5.49435	4.89399	1.60315	77.6128	14.1803	10.0227	3.25775	2.15092	0.95566	109.419	16.3076	15.7141	4.5148	4.70804
7	0	1	0.481481	0	0	1	0	0	28	1.19126e+06	1.20448e+06	-1.3599	-0.271287	1.8149	447.127	62.9741	18.6946	5.44466	2.99001	3.60754	362.846	57.104	17.7922	5.14324	4.95561	12.5637	578.301	62.8398	18.5566	6.9631	4.14578	8.42295	112.87	21.4548	16.2485	6.44694	5.06618	5.61694	89.1118	15.3525	16.016	8.4619	15.5854	63.4567	132.671	20.6877	14.8903	9.06873	11.5803
7	0	1	0.518519	0	0	1	0	0	28	1.07773e+06	717800	-1.47972	-0.737254	1.66114	150.084	36.6875	11.1128	4.11626	2.79101	1.02026	154.373	33.1985	8.78855	4.08244	2.25156	1.00322	185.993	36.1101	9.55095	3.61651	2.65591	1.05287	50.8947	21.2733	11.1718	4.90614	4.68861	1.62757	41.9083	13.4349	9.13307	3.20537	2.05364	0.77538	44.0228	16.1836	11.16	3.77445	3.7792
7	0	1	0.555556	0	0	1	0	0	28	4.03222e+06	1.23596e+06	1.4687	-0.199571	1.62169	466.386	51.007	16.0716	4.80951	3.78906	4.13942	408.845	47.816	10.7908	4.82479	6.7921	12.2249	518.306	52.4641	16.2057	4.68054	3.60585	11.0303	123.91	20.4252	15.7559	6.7546	6.21451	6.23871	119.957	19.9479	10.6529	14.7225	18.3881	50.0513	134.641	20.5083	19.325	8.40299	11.9945
7	0	1	0.592593	0	0	1	0	0	28	3.94281e+06	1.34884e+06	1.37338	-0.067899	1.65306	380.402	49.2349	18.8275	4.47057	2.71238	1.42007	320.874	45.7105	13.0314	4.11808	2.5897	1.60727	517.224	47.2107	16.4451	4.18061	2.66746	1.68497	96.4867	26.336	22.8484	5.90668	4.11309	1.95861	88.832	15.8779	11.579	3.70046	2.82328	2.07052	120.869	19.4545	19.6591	5.78639	4.6864
7	0	1	0.62963	0	0	1	0	0	28	1.03265e+06	1.02638e+06	-1.54164	-0.376928	2.19824	369.735	68.5541	21.701	5.6248	3.68687	3.57505	353.539	71.9956	16.379	5.56306	5.526	11.0891	498.32	58.814	22.3159	5.93794	5.0757	6.60353	108.768	26.5594	18.7368	6.89439	6.20587	6.23627	97.9505	20.8062	14.2895	11.4041	11.6736	65.1971	129.064	22.356	16.6533	7.5036	15.6293
7	0	1	0.666667	0	0	1	0	0	28	3.06425e+06	1.57579e+06	0.483037	0.196408	1.73647	625.169	71.2693	19.7529	4.96188	2.95995	1.19945	594.133	59.464	14.9496	4.75778	2.70092	1.30247	738.371	69.1653	16.4008	4.49347	2.989	1.54643	138.658	26.1823	19.0582	6.1759	5.45819	2.00897	138.033	16.9757	9.74408	3.61134	2.62952	1.64892	152.811	22.5438	16.161	5.04899	4.7944
7	0	1	0.703704	0	0	1	0	0	28	1.28707e+06	1.53873e+06	-1.30021	0.178898	1.69443	392.764	47.9088	13.3352	4.1797	2.52171	0.97297	331.157	36.0531	9.21261	3.08684	2.00502	0.96076	425.892	49.1653	12.2771	3.70152	2.37994	1.07596	107.31	23.4762	12.3985	4.99703	3.99136	1.62985	84.5731	12.1353	9.41502	2.54197	1.99733	0.72704	104.567	20.4673	10.092	3.87855	2.63805
7	0	1	0.740741	0	0	1	0	0	28	1.40409e+06	1.39597e+06	-1.18895	0.054126	1.80258	503.33	43.4166	12.5109	3.77106	2.87989	1.04311	466.435	35.4559	9.33264	2.76924	2.19862	1.01629	535.007	44.08	11.0748	3.68337	2.47267	1.09412	129.428	18.9593	11.5998	4.42778	4.92206	1.70212	121.019	11.6443	10.1487	2.49983	2.21645	0.8106	127.802	15.9145	11.3085	3.66099	3.5824
7	0	1	0.777778	0	0	1	0	0	28	7.17016e+06	1.52049e+06	4.57154	0.195752	1.99561	398.227	48.7831	12.7336	4.42455	6.54953	5.86216	478.211	45.6983	11.689	5.63479	9.4638	18.2087	411.437	47.7051	11.9418	6.17993	11.0452	21.5645	120.858	22.2033	10.7555	5.59382	10.672	8.53374	160.13	19.109	10.1209	17.8527	63.5187	51.093	130.598	20.2673	14.311	13.7062	46.6251
7	0	1	0.814815	0	0	1	0	0	28	3.598e+06	1.71605e+06	0.995515	0.399746	3.02121	870.914	62.5349	13.6906	6.37756	4.25308	6.44522	882.635	63.3459	15.0115	8.35523	13.5384	29.7405	1024.53	65.7195	16.0275	7.86015	9.10656	16.7219	229.085	31.9605	11.8309	7.67433	7.01506	8.9793	300.979	34.9048	14.8	18.3458	23.638	64.7591	244.238	35.0287	17.835	13.1935	18.0455
7	0	1	0.851852	0	0	1	0	0	28	1.64425e+06	976310	-0.966391	-0.309879	1.96511	131.067	32.9965	14.6089	3.23595	1.9838	0.89967	137.41	27.7195	9.47839	2.3501	1.64775	0.90139	137.011	27.8218	10.7964	3.23967	2.11185	0.9504	49.1625	20.8342	12.171	3.82078	2.79147	1.37046	39.9519	10.6292	5.55269	2.01683	1.31959	0.73185	48.276	14.0942	12.6331	3.48538	3.66414
7	0	1	0.888889	0	0	1	0	0	28	2.61673e+06	1.20731e+06	0.003174	-0.07529	3.4554	792.616	77.9051	18.5103	5.55632	4.52245	5.62306	634.732	65.6536	14.7233	5.06436	4.84253	16.0287	973.097	88.046	17.3782	7.34841	7.17754	11.455	178.848	27.8758	12.3073	5.58909	6.07851	8.20592	179.046	21.4514	10.961	18.8397	31.2105	78.6441	203.155	26.2695	14.6836	10.0837	14.661
7	0	1	0.925926	0	0	1	0	0	28	4.85582e+06	1.46594e+06	2.23674	0.200167	3.67492	596.642	76.1485	19.2643	5.90185	6.58041	10.0043	474.608	64.82	14.5771	8.62704	14.3345	32.6883	690.485	67.6067	19.604	6.73598	15.8757	28.5871	141.834	26.9792	15.7301	7.2325	10.6087	17.3035	131.253	19.545	11.9962	33.8208	89.5229	195.754	155.31	22.287	17.2712	13.893	46.4097
7	0	1	0.962963	0	0	1	0	0	28	2.13403e+06	1.84467e+06	-0.493531	0.610629	2.46365	197.668	58.7811	13.5715	4.59969	3.03365	2.34786	212.966	55.875	12.2916	3.95789	3.15997	4.3982	277.689	56.3544	13.1285	4.97826	5.04565	3.45456	62.0822	22.5176	13.5833	5.27482	4.68697	4.83943	59.7841	19.566	10.9639	5.13085	17.6387	36.0849	70.4973	18.1424	13.5051	5.25267	9.21752
7	0	1	1	0	0	1	0	0	28	986165	826293	-1.6469	-0.390997	2.69082	151.183	37.363	12.2409	2.9446	2.1851	1.0409	135.442	31.5293	7.9925	2.49673	1.66749	0.94371	263.177	38.5578	12.135	3.40248	2.24126	1.19666	47.9127	17.7657	12.2147	3.74954	3.59962	1.53986	38.6185	11.296	6.39522	1.99672	1.60214	0.85781	66.5819	14.2025	12.2461	3.2522	3.30005
7	0	2	0.037037	0	0	0	1	0	28	1.86566e+06	1.88314e+06	0.172594	0.28486	1.18386	337.402	41.7904	10.7334	4.27698	3.07954	2.20049	269.03	38.2901	9.11285	4.37182	3.8631	7.68015	393.475	40.0394	9.99736	4.21778	2.7492	1.99829	90.3851	18.1608	9.08072	4.84435	5.58346	4.21619	83.6832	17.1251	12.0085	8.65653	19.9032	38.8134	102.944	14.7029	10.276	3.88072	4.92733
7	0	2	0.074074	0	0	0	1	0	28	2.39988e+06	2.71313e+06	0.677525	1.12602	1.18023	351.481	48.3482	17.6296	6.23503	3.53266	2.25095	246.209	39.704	13.1199	5.81099	3.75806	4.75527	469.413	46.2264	19.3688	6.53769	4.06294	3.41244	89.6769	26.3975	20.2027	8.32968	5.97008	3.41438	65.3816	16.5735	14.3387	6.79778	8.10747	12.4268	109.929	20.2915	16.4906	8.29937	6.67999
7	0	2	0.111111	0	0	0	1	0	28	755600	1.08887e+06	-0.995736	-0.488628	1.32465	144.591	34.4091	10.3049	3.63034	2.82495	1.20428	151.137	29.0502	6.9993	2.66696	2.30846	1.01072	151.394	30.773	8.74379	3.62431	2.43663	1.23012	42.9955	18.4265	11.9623	4.54577	4.20858	1.92515	41.6981	11.0674	7.85683	2.33805	2.09484	0.8851	40.5518	13.6275	13.2848	3.79674	3.37911
7	0	2	0.148148	0	0	0	1	0	28	1.25947e+06	1.21027e+06	-0.521543	-0.354084	1.13165	575.37	44.4374	17.543	6.29272	6.08818	6.96194	468.417	43.2094	13.5201	9.68815	20.4146	28.8002	755.631	48.6654	20.0867	7.039	7.5547	16.2699	149.997	26.0251	18.1007	8.87296	11.6604	11.0689	162.49	27.6118	14.3235	29.7889	110.796	114.765	182.61	23.9756	19.2617	15.3233	23.6678
7	0	2	0.185185	0	0	0	1	0	28	1.46391e+06	1.06318e+06	-0.346485	-0.489552	1.08365	382.357	34.678	11.4583	4.00554	2.44485	2.04915	336.979	29.8419	8.67414	4.21867	4.16284	4.13018	391.971	31.2741	8.73903	4.05891	3.22417	3.66648	93.4887	18.3432	11.5362	5.34844	3.80365	2.90756	84.4213	11.5348	6.67032	4.2168	7.13261	15.4881	99.2499	13.1031	8.35949	5.45121	4.24218
7	0	2	0.222222	0	0	0	1	0	28	1.6427e+06	1.1961e+06	-0.196791	-0.346435	1.17318	487.894	39.941	16.5612	5.95781	5.51449	4.70979	416.046	32.5607	11.3533	6.75502	13.4542	11.8204	489.221	36.188	16.2611	6.31628	7.63961	11.8304	124.584	25.1718	17.3672	7.96407	9.88261	7.9935	123.169	16.373	14.8581	13.4812	43.5194	65.2384	137.468	19.3998	18.0509	10.086	27.7833
7	0	2	0.259259	0	0	0	1	0	28	1.93505e+06	1.29458e+06	0.066114	-0.235977	1.09129	399.776	53.5427	18.2075	4.57843	2.61091	1.56656	252.049	43.5235	12.3355	4.12466	2.79755	2.22268	587.887	56.6605	18.5583	5.26775	2.7568	2.39319	88.2598	22.5901	16.8743	5.66348	4.03598	2.4219	64.3773	13.8509	9.31203	4.45636	4.69869	4.93986	128.154	19.9956	13.2801	5.49101	4.4776
7	0	2	0.296296	0	0	0	1	0	28	1.43776e+06	1.34895e+06	-0.460639	-0.169533	1.00119	338.106	36.7696	10.6277	5.10037	3.51021	2.42216	325.735	28.3657	8.51272	4.17286	4.31178	4.95833	356.049	37.9168	10.6388	5.73216	5.36547	7.16995	101.184	19.4762	10.8186	6.00089	5.52176	3.39627	87.4865	12.472	10.5194	5.86236	8.34875	14.9136	96.2111	22.4969	11.3692	8.02237	9.31502
7	0	2	0.333333	0	0	0	1	0	28	1.65156e+06	1.46239e+06	-0.276161	-0.044761	0.980817	311.171	30.3509	12.733	4.2958	4.27933	4.21502	324.272	26.1354	10.2695	4.98814	6.21898	15.8296	301.6	25.0832	9.42064	4.94177	5.99872	10.3549	87.6693	22.6584	15.4389	5.30255	7.22116	6.18194	80.4781	13.2236	11.4986	8.5057	23.2593	54.2926	84.4441	16.419	12.1333	7.47151	16.1837
7	0	2	0.37037	0	0	0	1	0	28	1.44371e+06	1.18515e+06	-0.513115	-0.311778	1.06763	368.791	60.3107	15.9917	5.96437	4.95718	4.82981	380.82	75.1288	21.2296	6.6917	16.7473	18.8679	425.654	68.904	24.4012	9.97067	9.55376	18.563	121.554	30.0312	15.782	6.95737	8.05054	8.37882	184.408	52.3899	25.5171	15.5132	57.8727	87.7967	139.318	47.6885	24.4633	13.3971	26.072
7	0	2	0.407407	0	0	0	1	0	28	2.65765e+06	2.13385e+06	0.67148	0.648366	1.03763	824.737	57.0233	16.0843	6.07027	2.68639	1.74969	719.629	48.2001	11.3608	5.03812	2.74788	2.32713	771.975	50.7093	13.96	5.43613	2.86015	2.3033	221.332	27.1253	15.28	7.8378	4.50648	2.95851	185.528	16.992	9.43827	5.63088	5.23236	9.95945	202.198	20.9469	12.6642	6.15789	4.81832
7	0	2	0.444444	0	0	0	1	0	28	1.55502e+06	802028	-0.460227	-0.673368	1.13724	155.486	39.134	11.4839	3.67281	3.04365	1.07716	132.758	32.2525	8.67822	3.16184	2.21039	0.98393	167.954	32.2806	9.13311	3.27601	2.65595	1.38347	46.0903	20.6975	14.844	4.65598	4.95341	1.68108	35.2597	11.4214	7.99611	2.57097	2.08556	0.82221	45.0431	15.345	10.1851	3.49475	3.76929
7	0	2	0.481481	0	0	0	1	0	28	2.23235e+06	908322	0.187806	-0.555815	1.12463	120.745	36.6682	10.2929	3.81459	3.326	1.18637	145.077	30.962	8.45232	2.88604	2.60726	1.18749	120.23	32.53	7.85141	3.73562	2.9639	1.71198	38.7002	21.2806	13.5936	4.62848	5.47233	1.86856	41.2336	12.1451	7.45476	2.52571	2.17775	0.87834	33.4645	16.629	11.1765	4.23424	3.98692
7	0	2	0.518519	0	0	0	1	0	28	2.42419e+06	1.32498e+06	0.35027	-0.127597	1.08287	105.492	25.5262	10.8583	3.63161	3.20324	1.23651	108.7	21.5503	8.34679	3.23264	2.74469	1.17575	128.363	22.9134	8.34712	3.57333	2.94375	2.01799	40.7594	16.8502	13.8711	4.12342	4.79393	1.68554	34.5654	10.0563	6.97464	2.40237	2.25991	0.84156	39.0154	12.6062	9.26028	3.4986	3.39345
7	0	2	0.555556	0	0	0	1	0	28	2.51567e+06	1.08234e+06	0.412463	-0.359031	1.07573	624.701	70.9846	16.7182	5.14402	3.76976	3.61603	471.929	55.7606	11.7283	4.06516	5.55967	11.3069	794.409	79.0225	19.1561	7.13074	5.31321	9.0987	160.316	27.1248	12.9234	6.59312	6.01477	6.22443	148.553	21.4144	11.2337	11.0651	19.2314	57.3277	173.866	29.1275	14.3361	9.48647	16.9731
7	0	2	0.592593	0	0	0	1	0	28	2.15953e+06	1.75391e+06	0.02695	0.3241	1.03345	415.92	51.4598	15.2711	5.28364	6.68401	4.6473	298.446	48.2662	13.1172	10.1264	14.8539	17.2935	539.642	50.6208	14.9283	5.31217	11.2132	13.2137	99.0416	18.6734	12.5573	7.16193	11.8843	8.10013	100.73	23.564	14.9672	23.5813	85.2804	83.9523	137.365	24.0049	15.8728	15.6814	31.0957
7	0	2	0.62963	0	0	0	1	0	28	1.87623e+06	1.49018e+06	-0.282853	0.057469	2.38116	133.779	29.0484	10.3052	3.35451	2.73837	0.95492	127.094	24.648	7.99864	2.56379	2.32755	1.03643	172.58	31.6806	8.15469	3.12694	2.60292	1.35764	48.2961	15.8307	13.0552	4.27044	4.83525	1.53086	34.1898	9.23038	6.91125	2.39626	1.93124	0.70502	48.122	12.3706	13.5543	3.48885	3.78295
7	0	2	0.666667	0	0	0	1	0	28	1.57676e+06	1.0167e+06	-0.614213	-0.391668	1.11211	272.377	42.4004	13.7733	5.05441	4.57988	4.90191	263.513	37.9676	10.0687	7.0092	8.68336	18.0264	351.919	45.8528	13.0848	7.57912	8.60927	16.2109	74.3452	18.3355	16.8491	7.02238	7.93661	7.62095	89.972	15.2377	11.6851	21.4534	36.4537	75.7274	107.99	16.1874	16.3543	9.48759	29.1103
7	0	2	0.703704	0	0	0	1	0	28	2.20051e+06	1.66689e+06	-0.019966	0.270787	1.00302	657.077	47.7552	21.0465	5.65808	3.02513	2.22491	468.72	43.715	14.5729	5.25053	3.37892	5.73192	688.459	42.8237	16.8423	6.17171	3.77947	5.53571	161.329	22.9709	21.5394	7.33554	5.04421	3.84677	133.801	15.2117	10.6804	7.72884	19.4049	31.8411	169.597	18.0338	16.9419	9.02383	8.54966
7	0	2	0.740741	0	0	0	1	0	28	2.1945e+06	1.52626e+06	-0.05517	0.140836	1.04531	438.642	40.859	13.0517	3.8911	2.13253	0.91728	375.51	34.3388	9.77343	3.3227	1.89155	1.14732	456.831	36.4235	10.5514	4.2316	2.31922	1.26062	113.874	22.422	15.6892	4.7573	3.56205	1.42773	92.1887	12.2372	7.23837	2.60851	1.53777	0.72236	110.891	16.8698	12.609	3.62002	2.5216
7	0	2	0.777778	0	0	0	1	0	28	2.82388e+06	1.63379e+06	0.544955	0.259365	1.05824	115.338	30.3682	15.2302	4.01059	3.38181	1.54498	115.189	24.7863	11.0319	3.8046	2.75088	4.48025	156.484	31.1995	12.6828	5.11793	4.05252	3.21733	42.2595	19.0316	17.5389	5.29111	6.02042	2.49606	37.8569	10.4683	9.966	4.19632	7.10246	9.09784	47.7919	16.0494	13.679	5.34436	10.2638
7	0	2	0.814815	0	0	0	1	0	28	2.37373e+06	1.58186e+06	0.065559	0.218378	1.07556	248.34	24.94	10.3197	3.44378	2.64529	1.07321	176.994	21.7445	7.36474	2.9187	1.93951	1.05667	320.357	27.1343	10.6886	3.58773	2.80412	1.42074	68.1518	16.0425	11.3806	4.35915	4.0685	1.62956	49.0196	9.83954	6.04671	2.31313	1.98429	0.8787	75.895	12.7152	13.3917	4.0935	4.50199
7	0	2	0.851852	0	0	0	1	0	28	2.14838e+06	1.19086e+06	-0.189085	-0.161437	1.06999	330.801	50.1859	14.4763	5.02237	6.09408	7.60482	277.611	46.3351	13.0666	12.2758	24.9423	45.4064	480.841	54.8723	16.6558	7.0437	11.851	17.3305	96.828	22.2297	11.149	6.22366	10.7298	14.278	88.6	25.52	13.6134	28.8664	121.259	202.7	120.031	24.074	13.8165	10.1803	25.3655
7	0	2	0.888889	0	0	0	1	0	28	2.75031e+06	1.53762e+06	0.383601	0.196271	1.08786	383.912	49.8824	17.1683	5.97427	4.77754	5.12016	263.735	45.4899	13.0241	5.21884	7.39804	11.7354	478.439	45.5561	17.1156	6.83958	6.28864	10.8086	104.453	24.5556	15.2946	7.21907	8.33025	9.07304	75.5499	17.7288	13.0999	14.6514	28.8713	66.0441	130.623	19.7703	15.8173	8.35395	25.7632
7	0	2	0.925926	0	0	0	1	0	28	2.85474e+06	1.53831e+06	0.458771	0.207999	1.09657	546.272	54.0055	18.8087	4.86672	2.5732	1.76599	347.704	49.7875	12.8052	4.11553	2.6819	2.9779	717.784	50.6164	17.8192	4.54436	2.75009	2.77117	133.284	25.3095	16.8132	6.08424	4.84092	2.93936	84.2577	17.5158	9.64452	4.18826	5.1281	15.3431	162.733	20.6838	13.6863	4.88666	4.31203
7	0	2	0.962963	0	0	0	1	0	28	2.5399e+06	1.46413e+06	0.114673	0.144832	1.10728	424.666	49.433	19.8415	5.75092	2.82795	1.16647	455.623	48.3004	14.6833	4.97986	2.61624	1.27482	380.221	38.8361	14.2733	5.12407	2.8277	1.42146	103.734	26.4392	18.5302	6.67445	4.17786	1.70322	103.962	14.669	7.96904	4.04212	2.22616	1.15811	87.8502	18.8699	13.6453	5.22101	3.55909
7	0	2	1	0	0	0	1	0	28	2.47089e+06	1.2825e+06	0.016337	-0.025451	1.08635	413.588	39.5125	15.8745	4.4475	2.58571	1.06799	290.899	29.8816	11.1838	3.57059	1.93188	1.15812	634.154	42.6513	16.5936	4.67008	2.73078	1.2112	108.699	23.9311	15.7483	5.98072	4.76808	1.83665	76.3629	14.2347	7.77232	3.60026	2.04681	1.26203	144.123	20.2949	13.5641	5.00316	3.64331
7	1	0	0.037037	1	1	0	0	0	28	1.80771e+06	1.87764e+06	-0.362002	0.126558	1.30304	648.505	93.4053	20.6054	6.01213	3.55936	2.978	925.917	130.913	27.1796	5.90703	3.98028	3.28108	844.059	83.0258	18.7068	6.6501	3.53914	3.26277	157.118	26.2591	15.5312	7.34453	5.85303	3.93526	218.461	36.2541	14.8013	5.46811	4.57087	3.39176	194.664	21.6699	9.19399	4.83122	4.03102
7	1	0	0.074074	1	1	0	0	0	28	2.22931e+06	1.8273e+06	0.073186	0.089694	1.26958	250.883	52.9274	15.3764	4.03677	3.1707	1.39023	448.047	74.7015	19.1609	4.12465	2.70016	1.57142	416.279	60.0638	16.6928	4.81452	2.39763	1.66741	70.9945	18.2677	12.3712	4.87635	5.46511	2.24638	106.704	19.4138	11.8905	4.10725	3.69484	1.63307	91.6842	15.2998	9.07459	3.29629	3.16201
7	1	0	0.111111	1	1	0	0	0	28	3.32847e+06	1.60423e+06	1.186	-0.120232	1.26866	300.423	54.7084	15.0907	4.06735	2.69721	1.33338	381.472	69.346	16.5142	4.30058	2.3292	1.42901	339.941	48.2361	10.1304	3.92118	2.42722	1.74305	82.9677	21.7854	13.1875	5.50324	4.479	2.14861	101.202	19.8493	10.888	3.71302	3.05488	1.38815	86.0811	14.9909	7.15956	3.09585	2.26685
7	1	0	0.148148	1	1	0	0	0	28	2.10606e+06	2.12155e+06	-0.022717	0.410062	1.28408	310.861	59.9425	13.1854	4.54312	4.0624	3.50995	558.887	93.2232	18.2524	5.17053	4.84617	5.46407	335.879	47.0831	12.7458	5.33027	4.22064	4.194	101.936	24.5511	13.8344	5.58035	6.0392	4.88329	151.097	27.5233	12.6894	4.32825	6.22765	5.27745	108.163	16.5287	9.72717	5.39237	20.5995
7	1	0	0.185185	1	1	0	0	0	28	2.36341e+06	1.57713e+06	0.248332	-0.121442	1.30472	275.849	63.0372	14.9658	3.82949	3.01886	1.53407	397.707	83.2752	16.1896	3.66747	2.309	1.76981	331.476	51.4513	12.6597	4.43832	2.50733	1.63141	95.2867	23.4388	13.521	4.88912	5.12109	2.30371	113.02	24.1502	11.3831	3.42252	3.6893	1.64965	79.6937	13.7144	7.34516	3.46814	2.67723
7	1	0	0.222222	1	1	0	0	0	28	1.54715e+06	1.25578e+06	-0.554235	-0.429832	1.3209	282.339	61.1412	16.568	4.7538	2.49439	1.41065	430.105	82.7022	17.4204	5.10865	2.23783	1.71831	421.166	58.9906	12.0841	4.96839	2.45628	1.73851	68.5959	23.7944	17.8218	6.44921	4.16776	2.20751	103.52	22.5492	11.9071	5.17347	3.11359	1.46445	97.7471	16.4666	7.74341	3.70153	2.18886
7	1	0	0.259259	1	1	0	0	0	28	1.94205e+06	1.41971e+06	-0.145747	-0.252421	1.28767	215.082	54.6998	13.1853	4.48026	2.82176	1.51942	292.202	70.7284	13.8453	4.62217	2.78576	3.77644	336.045	51.3083	10.9452	4.16647	2.58468	1.7642	67.7425	21.3791	13.1285	5.33483	4.83433	2.44636	73.4821	20.5718	9.71237	4.11891	3.31691	1.81008	74.8909	14.0753	6.49262	3.08953	2.46792
7	1	0	0.296296	1	1	0	0	0	28	2.00807e+06	1.62554e+06	-0.066087	-0.033397	1.28134	436.905	59.3565	15.7553	4.17233	2.38189	1.46066	745.82	89.3833	17.2314	4.1455	2.52635	1.7211	681.807	49.2196	13.2233	4.01329	2.45623	1.53805	105.708	22.4757	14.8525	5.4354	4.29687	2.45844	155.104	22.284	10.9759	4.22268	2.89862	1.57911	134.649	14.6552	8.33109	3.25589	2.23699
7	1	0	0.333333	1	1	0	0	0	28	2.25802e+06	1.28891e+06	0.197598	-0.357253	1.31566	183.768	39.2359	13.2716	3.94184	3.30968	1.32973	301.634	51.851	13.3	3.59699	2.65616	1.67164	247.107	29.7804	10.0709	4.03238	2.48592	1.41023	61.8653	22.8911	15.814	5.12877	5.26959	2.25413	81.6821	19.3102	14.3132	3.50679	3.97891	1.37138	66.859	12.8862	8.49918	3.35668	2.72409
7	1	0	0.37037	1	1	0	0	0	28	1.50868e+06	1.5923e+06	-0.538254	-0.039914	1.23708	815.75	87.9504	20.4093	4.03319	2.99412	1.75436	1015.75	106.029	19.2052	3.53008	2.86607	2.77986	1043.37	89.7984	19.2805	4.94815	3.05386	2.92482	196.702	25.0728	17.9988	4.52136	5.37527	2.48563	234.572	23.6349	13.0094	3.42997	3.77447	1.90653	246.392	19.0001	11.033	4.87375	6.94773
7	1	0	0.407407	1	1	0	0	0	28	2.31491e+06	2.22495e+06	0.28172	0.605426	1.27955	727.742	99.109	21.5505	4.67417	2.81732	2.01875	968.402	125.64	21.4729	4.72195	3.01953	2.9201	758.874	85.2572	18.4924	4.9296	2.64314	2.23832	180.286	31.6184	16.3046	5.27356	4.48712	2.82246	237.765	33.0495	12.1367	4.24048	3.133	2.23546	181.395	23.3027	9.90988	3.83475	2.97091
7	1	0	0.444444	1	1	0	0	0	28	1.60222e+06	1.91305e+06	-0.417243	0.306334	1.31095	815.965	28.9301	9.55796	3.9122	2.57293	1.27975	1003.51	37.4605	9.4755	3.93057	2.03755	1.48156	772.674	25.309	7.73137	3.67455	2.41527	1.39482	193.53	21.9593	13.6193	5.24216	6.68825	2.35986	234.485	16.3376	8.66041	4.4636	3.14592	1.28761	187.054	12.1925	6.51202	2.9889	2.45711
7	1	0	0.481481	1	1	0	0	0	28	1.29902e+06	1.08001e+06	-0.706879	-0.513115	1.26656	342.407	40.711	15.9599	4.51519	2.62601	1.15641	461.326	47.3346	12.2527	4.11974	2.38093	1.55031	330.468	27.9972	10.2916	4.47785	2.41466	1.4106	103.261	27.8967	18.4319	6.43369	4.48418	2.01833	116.317	24.6425	11.0596	4.65237	2.70156	1.13493	82.7368	15.3607	10.5173	3.80228	2.25928
7	1	0	0.518519	1	1	0	0	0	28	1.69166e+06	1.63466e+06	-0.300637	0.054949	1.23941	766.87	39.27	13.073	6.2184	2.71816	1.49391	968.857	53.9981	13.3497	6.71589	3.38501	3.1335	825.267	30.8762	9.18342	4.89773	2.22798	1.78708	184.312	25.7716	15.7506	7.68289	6.00838	2.31829	219.672	22.0049	9.60593	5.88271	3.42382	1.62876	205.12	15.926	7.8702	4.78557	2.41543
7	1	0	0.555556	1	1	0	0	0	28	2.48034e+06	1.629e+06	0.50172	0.062346	1.24675	813.027	30.6555	13.6731	5.85093	3.25214	1.32443	1142.67	35.0481	11.8293	5.51817	4.06282	2.51815	557.531	23.9022	9.99349	5.3482	2.72851	2.0316	222.175	28.938	19.4043	7.74895	7.16209	2.43145	276.502	19.0511	11.131	5.16894	3.40775	1.34261	154.238	14.3637	9.06447	4.50381	2.75347
7	1	0	0.592593	1	1	0	0	0	28	2.1982e+06	1.67885e+06	0.233231	0.125314	1.24781	633.453	69.3832	19.079	4.87338	2.4437	1.40636	574.714	66.3885	14.7427	4.15743	2.47204	2.02256	892.54	80.9876	20.7461	5.81161	2.88649	2.15076	164.169	27.1441	21.5368	6.74107	4.72795	2.36112	142.308	23.4662	12.011	4.77668	3.11162	1.86964	204.377	24.5585	12.9757	4.02753	2.94425
7	1	0	0.62963	1	1	0	0	0	28	2.23401e+06	1.74554e+06	0.282747	0.204905	1.2703	269.746	53.0373	14.1944	6.50468	5.09227	10.8017	307.527	58.3017	13.779	8.07588	11.8179	30.1685	351.856	51.3658	12.9721	9.77255	7.79298	23.0761	80.9492	21.0081	13.4247	8.21687	8.79562	16.4899	89.3581	23.4455	12.0966	12.7018	33.3162	71.977	114.453	28.7529	21.1927	50.9575	43.2529
7	1	0	0.666667	1	1	0	0	0	28	2.08268e+06	1.28791e+06	0.145144	-0.239957	1.3052	178.345	48.1288	10.9663	3.46268	3.23609	3.1122	305.686	56.956	12.7964	4.31075	4.64559	6.20826	263.772	40.032	10.0035	3.37834	4.3719	5.28984	57.714	26.3102	10.3361	4.96209	6.02736	5.53321	84.4215	22.3194	9.42613	5.75963	8.66891	15.1241	57.0738	16.5187	11.0184	13.8452	37.436
7	1	0	0.703704	1	1	0	0	0	28	2.28432e+06	1.28257e+06	0.360192	-0.230894	1.18265	239.342	60.5881	13.7515	4.03553	2.71993	1.93734	320.587	67.855	15.4239	4.18065	2.64617	2.57377	336.653	56.4924	11.5699	4.06193	2.73932	4.00602	81.0177	27.0002	14.3414	5.78741	5.71406	3.69071	87.5488	22.6604	11.6773	4.63098	5.22679	5.66381	112.764	21.654	9.54745	14.8802	28.6972
7	1	0	0.740741	1	1	0	0	0	28	1.28326e+06	978502	-0.627256	-0.521583	1.15915	192.215	39.9705	12.765	5.47512	4.10067	4.10549	300.198	52.4149	12.1785	6.29014	4.91989	9.19326	300.118	37.6551	11.8959	7.18547	7.5229	17.3293	62.7999	23.0199	14.7308	7.27924	7.09617	6.02479	73.3079	20.6092	10.5902	9.70799	11.737	14.7996	99.1923	14.386	14.8848	46.4789	77.6169
7	1	0	0.777778	1	1	0	0	0	28	1.80282e+06	1.15211e+06	-0.093979	-0.335171	1.19098	462.624	68.9608	14.8077	4.55107	2.38423	1.39984	523.229	68.3617	13.8748	4.55452	2.42725	1.76169	537.634	62.6176	16.0023	4.32543	2.37485	1.59123	120.458	27.8576	16.4626	6.13251	4.19591	2.31924	131.683	23.143	12.382	4.8313	3.05833	1.83034	132.391	23.7371	10.6239	4.19112	4.32166
7	1	0	0.814815	1	1	0	0	0	28	2.44494e+06	1.73725e+06	0.561751	0.263367	1.1647	307.336	39.9663	13.0222	5.08037	2.8139	1.24007	460.179	45.5028	12.5295	4.48046	2.48419	1.40885	329.173	36.2238	11.8268	4.82927	2.26357	1.4319	90.5347	29.1675	15.6992	6.68949	5.21766	2.1878	119.116	19.7808	11.3916	4.85604	3.20808	1.40509	81.7171	16.3956	8.26939	3.95156	3.05577
7	1	0	0.851852	1	1	0	0	0	28	1.8037e+06	1.55725e+06	-0.065767	0.096146	1.19902	836.467	63.2854	18.8082	4.6788	2.82467	1.24118	1109.82	83.4466	19.3429	4.69371	2.30014	1.34882	672.524	54.0251	15.625	4.65428	2.19599	1.33729	223.392	28.1335	19.4768	6.53561	5.33427	2.15906	284.854	28.8998	15.7178	4.85922	3.64923	1.39754	167.926	19.6011	10.2282	4.38792	2.61771
7	1	0	0.888889	1	1	0	0	0	28	2.02369e+06	1.45762e+06	0.167819	0.009986	1.16623	275.177	53.0537	14.3145	4.92714	3.82667	3.93436	339.446	60.8526	14.9906	5.74005	5.56973	10.683	382.385	55.8234	12.5346	5.42547	6.25028	7.732	80.8422	20.8403	14.9217	6.38512	7.45474	7.13971	85.0122	20.2082	11.152	9.33171	17.4376	30.9426	110.185	17.5575	10.637	19.4062	56.3354
7	1	0	0.925926	1	1	0	0	0	28	2.09765e+06	1.73889e+06	0.255595	0.303569	1.24531	840.573	71.5633	15.0909	3.73638	2.09168	1.15358	924.694	83.9899	15.5395	3.37783	1.82332	1.24609	886.022	60.5281	11.2907	3.90271	2.05819	1.42586	196.988	32.9748	16.0303	5.30251	3.39556	1.95053	222.408	26.3309	10.5412	3.68514	2.28601	1.64866	202.76	20.0904	7.48982	3.23561	1.97423
7	1	0	0.962963	1	1	0	0	0	28	1.24887e+06	1.39295e+06	-0.579599	-0.028873	1.20995	640.252	52.4474	15.7732	5.59595	2.71264	1.38814	806.454	48.4338	13.7373	5.10441	2.46676	1.60838	650.534	55.5029	14.2802	4.50291	2.14754	1.5258	137.342	28.8019	19.5489	7.22891	5.85444	2.58776	167.882	20.3067	13.1387	7.05933	4.08262	4.26247	133.471	18.5093	9.88951	5.93296	5.07853
7	1	0	1	1	1	0	0	0	28	1.69027e+06	1.39745e+06	-0.12457	-0.011103	1.19625	676.337	47.1422	14.1393	5.56815	3.65008	1.43583	753.181	45.3776	12.1388	5.36491	3.42304	1.55589	672.937	37.3367	11.0882	4.38557	2.69519	1.63921	148.287	25.6463	15.748	6.71473	6.11823	2.35421	174.874	20.8592	12.4409	5.40902	5.2342	2.47285	149.004	15.4335	8.51672	3.73086	2.96277
7	1	1	0.037037	1	0	1	0	0	28	1.6011e+06	1.50334e+06	-0.293661	-0.078671	2.61243	382.175	52.8427	11.0385	3.79759	2.10877	1.6191	458.25	60.9192	12.3616	3.85896	2.31823	1.7342	539.205	53.0496	11.2089	4.2979	2.13409	1.51584	83.963	21.9842	11.0652	4.70049	3.05568	2.56412	98.824	18.3753	8.02914	3.68921	2.34892	1.77201	120.868	16.8494	6.35977	2.89555	1.69699
7	1	1	0.074074	1	0	1	0	0	28	1.50741e+06	1.62544e+06	-0.38815	-0.017247	8.49119	540.943	70.4263	16.66	5.16051	2.49237	1.72942	476.418	88.6363	15.2736	4.5106	2.36976	2.13831	658.397	53.6373	12.9815	5.26654	2.5023	1.76972	147.659	29.633	17.7659	7.34116	3.79259	2.52741	133.304	26.2708	10.9774	5.06004	2.70439	2.06445	170.444	16.0237	7.2607	4.45963	2.31003
7	1	1	0.111111	1	0	1	0	0	28	2.99279e+06	2.17381e+06	1.07109	0.598505	2.07413	339.592	66.603	13.6633	6.70889	4.3031	6.84584	456.448	84.3858	13.4785	6.52086	4.77677	8.02051	479.776	56.0368	15.4111	6.95891	4.74042	7.55531	95.9979	28.7782	16.0024	9.09063	5.87476	7.12773	116.553	25.8592	10.7768	7.204	5.30419	7.14524	109.948	20.1191	12.2825	8.27699	7.42674
7	1	1	0.148148	1	0	1	0	0	28	1.48093e+06	1.05511e+06	-0.447729	-0.549739	4.96418	298.035	35.4028	13.202	3.73984	2.24287	1.08173	321.991	30.1798	9.66821	3.04265	1.8605	1.09798	325.388	34.1698	10.3946	3.3635	1.8948	0.989	76.0228	22.6972	14.7721	5.45301	4.18349	2.27343	79.3845	14.6136	8.86001	3.85579	2.49139	1.23858	72.3152	15.111	6.70804	3.14314	1.94496
7	1	1	0.185185	1	0	1	0	0	28	2.41308e+06	828139	0.470497	-0.771084	4.47653	193.121	46.5835	11.5365	3.82066	2.37896	1.01143	247.605	54.3387	10.6446	3.4309	1.93491	0.99342	216.198	34.1796	8.69837	3.18905	2.16547	1.01816	59.2044	19.1905	12.9586	4.94196	3.9565	1.8067	66.4679	17.5262	8.76295	3.62215	2.77466	1.15594	53.7605	10.5061	6.86834	2.81262	2.26852
7	1	1	0.222222	1	0	1	0	0	28	1.22527e+06	1.09116e+06	-0.73621	-0.477309	1.5764	169.533	37.3098	10.4566	3.59474	2.4899	1.16567	285.076	45.678	8.58615	3.34239	2.22274	1.19203	204.566	30.6026	9.61121	3.33127	2.04871	1.29499	57.794	19.9814	13.2127	4.28308	4.1162	1.79676	73.6013	16.9561	8.82374	3.0566	2.87539	1.1735	48.8826	11.4775	6.17392	2.80462	2.01206
7	1	1	0.259259	1	0	1	0	0	28	1.70464e+06	1.25191e+06	-0.267476	-0.327542	2.68389	354.666	41.6413	14.0718	3.63847	2.36476	0.94798	504.487	43.0207	13.4037	3.42623	2.12184	1.09815	333.05	36.7029	11.4639	3.6199	2.04855	1.23209	104.791	24.8198	17.7531	4.89361	4.42614	1.84705	129.476	18.3479	12.9749	3.72969	2.81451	1.12746	84.4132	14.676	7.99447	2.89826	2.13777
7	1	1	0.296296	1	0	1	0	0	28	1.48069e+06	1.49446e+06	-0.505647	-0.077867	2.05264	523.462	44.1992	18.1321	4.9084	3.25872	1.30254	650.294	40.6024	13.956	4.29675	3.18832	1.98235	589.827	40.7986	11.8961	4.62654	2.85991	2.03022	125.747	28.3307	21.412	7.54009	6.93715	2.35361	151.306	20.5043	13.4634	4.85331	3.83304	1.29902	132.384	17.1213	9.87973	4.30911	2.61153
7	1	1	0.333333	1	0	1	0	0	28	1.12593e+06	1.12534e+06	-0.872375	-0.451231	2.51354	384.19	46.6148	15.3412	4.68844	2.51527	1.50834	488.461	52.6084	12.7832	4.18452	2.68863	2.29759	518.643	51.9495	14.6559	5.28606	2.93205	2.5286	95.3368	20.7142	14.6748	6.1641	4.35724	2.19905	110.696	18.7926	10.7661	4.34538	3.19714	1.65541	117.106	16.1	8.4284	4.07201	3.06619
7	1	1	0.37037	1	0	1	0	0	28	2.90465e+06	1.49073e+06	0.896871	-0.10265	4.18041	271.053	27.6132	9.4332	4.22241	3.27573	1.17481	393.082	24.8651	7.32658	3.76254	2.83911	1.64555	343.474	25.295	8.12539	4.06879	2.77968	2.31736	79.7672	24.4141	13.9345	5.56235	7.0698	2.26046	93.5722	15.1192	8.35487	4.14584	3.59762	1.21576	83.1183	13.494	7.16987	3.3163	2.60793
7	1	1	0.407407	1	0	1	0	0	28	2.07522e+06	1.79329e+06	0.052419	0.21105	3.16317	1106.47	54.6807	15.4999	7.07508	3.4021	1.30959	1301.25	44.9458	11.9153	6.6174	4.09233	2.74673	932.182	43.4736	11.5123	5.17217	3.34376	2.55565	254.614	38.1094	18.8599	9.23806	7.43426	2.54057	299.924	26.6425	12.4841	7.55815	4.36785	1.79933	209.881	25.9073	10.2188	5.00723	3.08537
7	1	1	0.444444	1	0	1	0	0	28	2.70287e+06	2.26587e+06	0.666571	0.687142	2.87866	705.624	44.8213	21.2797	5.80566	2.91701	1.3034	889.461	36.9524	13.2159	6.09825	4.81094	5.96036	535.364	31.0646	13.7752	4.80771	3.93774	3.56848	168.825	39.6025	29.3643	8.96329	5.65286	2.53065	205.511	27.3893	15.3641	5.68388	3.45435	2.03738	128.488	21.8196	13.1072	5.09175	3.49895
7	1	1	0.481481	1	0	1	0	0	28	1.9956e+06	1.48043e+06	-0.052397	-0.103905	3.4698	379.725	30.0545	12.9033	5.46206	3.15856	1.18491	504.523	31.4765	10.388	5.84099	4.49177	4.8052	420.09	25.6443	11.5867	5.03358	4.16051	3.22304	97.6074	35.0256	18.9899	8.17178	6.15827	2.1254	117.341	20.8783	12.1442	5.95743	3.83742	1.52647	93.6005	16.9023	9.38204	4.69869	2.54252
7	1	1	0.518519	1	0	1	0	0	28	1.88914e+06	1.89261e+06	-0.173587	0.317992	2.58981	572.386	43.6657	18.9252	7.30368	3.42479	1.61499	758.468	31.4039	14.6502	7.48904	6.33328	7.5932	447.029	31.8879	11.7184	5.96019	4.52361	4.15953	169.059	35.5453	25.3987	10.8662	7.7155	3.06547	196.02	22.7792	16.2136	7.61955	4.34775	2.174	113.322	20.3884	11.3279	5.76947	3.98716
7	1	1	0.555556	1	0	1	0	0	28	1.71174e+06	1.70055e+06	-0.36413	0.127616	2.48165	416.964	44.4111	14.0657	5.45446	2.99328	1.54239	496.407	43.9647	12.261	6.70992	5.05457	6.44492	458.18	37.9905	12.6869	5.24655	3.9209	4.05044	108.397	24.3827	18.7247	7.02647	5.48546	2.44051	117.437	19.7601	14.0735	5.65035	4.08087	2.487	112.68	20.4008	9.59678	4.46715	3.36867
7	1	1	0.592593	1	0	1	0	0	28	1.6319e+06	1.65627e+06	-0.458027	0.089639	1.92922	698.996	42.5452	20.7173	6.96417	3.44199	2.0187	955.464	34.364	14.0294	8.38725	5.4048	6.33289	525.669	29.1513	15.0402	6.00391	4.38352	3.80935	172.27	47.8613	27.781	10.0383	7.87047	3.25993	202.005	30.3148	17.1962	7.41795	4.21008	2.45255	126.87	23.6745	15.695	5.59841	3.24341
7	1	1	0.62963	1	0	1	0	0	28	2.67974e+06	1.89796e+06	0.578745	0.322561	2.82348	305.359	35.6017	20.1102	6.83831	3.41493	1.41598	480.39	41.3126	14.3467	7.67313	4.70863	5.23234	273.195	32.4131	16.7078	5.85523	4.28701	3.63288	94.0807	22.6624	25.2764	9.08489	6.69461	2.52457	121.693	18.0997	15.0666	6.7238	4.09291	1.77561	71.8511	13.3271	12.5826	5.29088	3.44644
7	1	1	0.666667	1	0	1	0	0	28	2.44071e+06	2.14179e+06	0.326104	0.570403	2.4916	420.034	44.3321	19.5887	6.04066	3.37458	2.24324	579.172	31.7417	15.8092	7.10976	5.80993	6.71412	332.556	30.4627	11.7976	6.41698	6.82601	10.1065	111.719	53.6107	27.3196	9.35452	7.78242	3.87133	134.239	32.0865	18.7123	6.55485	5.15433	4.95038	100.633	27.0447	14.2865	14.1244	26.2676
7	1	1	0.703704	1	0	1	0	0	28	2.65317e+06	865408	0.525679	-0.705581	2.50615	198.095	37.8202	12.1536	4.21601	2.87156	1.61409	248.993	40.9726	10.4994	4.84374	4.53965	5.09241	287.957	37.6315	10.4731	5.30151	4.36903	5.45868	61.9645	17.4002	13.6098	5.14997	4.99016	2.58898	67.6974	15.9967	12.5002	3.84954	3.96008	2.37448	70.5859	12.3193	7.57014	5.87247	6.23978
7	1	1	0.740741	1	0	1	0	0	28	1.58999e+06	1.56894e+06	-0.551973	0.006356	1.75224	803.387	58.8695	16.5759	5.25434	2.85539	1.70756	958.767	62.0684	13.5036	6.0411	3.90221	4.19385	764.21	50.0808	14.8823	5.89316	3.64568	3.74421	170.532	29.6148	18.3341	6.86939	5.58132	2.79074	208.125	24.66	13.2529	5.50214	3.69071	2.01394	161.74	19.5181	9.85123	4.29129	2.93844
7	1	1	0.777778	1	0	1	0	0	28	2.27256e+06	1.92256e+06	0.119755	0.350031	2.75955	487.057	64.5661	17.0199	5.02583	2.82786	1.36199	523.206	67.7529	15.1062	5.90988	4.07083	4.07471	669.896	59.2321	15.2214	5.01771	3.71097	3.6584	127.811	33.9279	18.2492	6.66294	4.7636	2.5639	132.436	28.1353	12.9545	5.31711	3.20246	1.69377	151.378	21.4934	9.97071	3.8513	2.70741
7	1	1	0.814815	1	0	1	0	0	28	2.19439e+06	2.51247e+06	0.032526	0.921023	4.62873	483.646	86.1442	27.1258	4.90315	2.74652	1.39498	534.651	93.4464	19.9543	5.16668	2.32659	1.5876	800.654	87.0026	25.1932	5.01814	3.2441	1.82656	99.7764	27.4885	21.2705	6.19242	4.46809	2.20176	113.538	30.1015	15.7633	5.13144	3.06636	1.68338	173.574	25.0334	13.0825	3.30684	2.67837
7	1	1	0.851852	1	0	1	0	0	28	1.17174e+06	974479	-1.00798	-0.591507	2.2373	195.194	45.726	16.2316	4.10672	2.38589	1.18421	292.34	55.7698	16.163	3.63035	2.10295	1.23909	183.333	39.6954	15.0008	4.71291	2.19172	1.5921	67.1254	19.1446	13.9128	4.91687	3.77375	1.80103	83.7068	17.9353	11.126	3.62904	2.83901	1.25755	46.0195	11.8129	8.21906	3.5235	2.22001
7	1	1	0.888889	1	0	1	0	0	28	1.47163e+06	1.00072e+06	-0.722103	-0.559129	1.70066	403.847	81.1736	15.8285	4.01506	2.77407	1.33216	401.057	92.7207	15.7041	4.13035	2.48596	1.37679	596.199	77.1636	15.1251	4.31755	2.7894	1.77903	104.41	24.9765	14.0384	5.31993	4.93366	1.95499	97.3051	24.7048	13.849	4.41115	3.43002	1.43736	142.716	19.0111	9.03831	3.37117	2.55459
7	1	1	0.925926	1	0	1	0	0	28	2.21769e+06	1.62125e+06	0.010856	0.062854	1.6147	1041.02	46.9069	16.4378	4.8455	2.56936	1.13117	951.786	53.0542	12.956	3.93132	2.22117	1.21306	1414.6	53.696	15.241	4.48832	2.18817	1.51589	207.064	20.0566	15.7857	6.36937	4.6533	1.89772	207.056	17.9259	12.0547	4.45076	3.01417	1.14228	284.105	16.0302	8.77738	3.31392	2.00443
7	1	1	0.962963	1	0	1	0	0	28	4.38344e+06	1.24465e+06	2.1645	-0.317245	2.00293	560.125	65.4976	19.1909	4.99887	2.51212	1.35062	499.308	88.602	15.7199	4.98792	2.93809	2.03597	1145.43	62.8641	18.1095	5.09029	2.58359	1.96992	142.799	26.7644	20.7786	6.77739	4.09312	2.10778	119.236	24.734	13.984	4.44582	3.06474	1.54215	257.5	19.666	9.94457	3.99947	2.67961
7	1	1	1	1	0	1	0	0	28	1.8397e+06	1.65904e+06	-0.391542	0.094557	2.30406	634.99	63.5909	15.636	5.51247	2.65864	1.17612	710.439	73.0647	12.612	4.44155	2.33859	1.27949	892.845	63.1217	13.8938	4.91137	2.4239	1.67747	139.872	24.6763	15.5702	6.72482	5.10312	2.13488	152.643	21.5597	9.45092	4.83645	3.41853	1.48376	192.678	18.4956	7.95985	3.63453	2.13029
7	1	2	0.037037	1	0	0	1	0	28	4.1696e+06	1.47885e+06	2.09996	-0.10248	1.1999	373.648	63.9272	17.079	4.66562	2.82695	1.5243	258.854	46.3916	14.4042	4.59661	2.53827	2.38657	626.08	77.9121	15.5564	3.87456	2.51643	1.61284	104.023	24.8395	12.8011	5.26764	4.5838	2.49592	85.5018	18.0741	10.239	4.36279	3.28072	2.55076	149.963	21.6698	7.71375	3.06224	2.833
7	1	2	0.074074	1	0	0	1	0	28	1.71142e+06	1.32763e+06	-0.337234	-0.242079	1.20682	514.306	57.1923	14.631	3.48978	2.92774	1.18339	465.118	71.2291	16.2838	3.32867	2.72421	1.40331	904.776	62.4689	14.7236	3.80086	2.4898	1.40549	121.537	20.756	12.3741	4.61655	5.06995	2.26473	114.314	20.277	12.2995	3.63773	4.05362	1.44543	195.371	14.7618	7.57814	2.71571	2.56979
7	1	2	0.111111	1	0	0	1	0	28	2.52536e+06	1.69422e+06	0.497673	0.136226	1.20489	717.854	81.1334	17.5376	5.05219	3.09044	2.2714	568.654	115.553	21.6044	5.29769	2.75028	2.67613	1824.98	88.8261	17.6354	5.1392	3.05093	2.43958	153.187	24.8217	13.7767	6.2604	4.71892	3.00751	114.695	28.0229	11.0891	4.79875	3.28085	2.70374	380.469	23.4553	8.45219	4.04243	2.85806
7	1	2	0.148148	1	0	0	1	0	28	1.29784e+06	1.40187e+06	-0.708833	-0.144631	1.22515	294.427	74.567	18.8054	4.60464	2.6618	1.40133	403.484	82.6382	18.6719	4.54429	2.75846	1.91482	437.002	74.6799	15.6748	4.8279	2.96188	1.98111	82.234	23.5106	14.246	5.02137	4.54948	2.25733	101.384	23.0982	10.7502	3.87125	3.54562	1.9554	105.729	19.9313	8.71761	3.3203	3.41352
7	1	2	0.185185	1	0	0	1	0	28	2.9546e+06	3.3121e+06	0.968952	1.77699	1.25405	1482.94	166.131	25.1996	7.24725	7.09663	7.61344	1418.57	164.987	23.2943	8.31277	13.0296	28.3773	2389.31	186.514	33.1816	11.1321	16.29	21.1279	294.867	43.1254	18.4937	8.41205	9.33481	10.5013	323.672	44.5496	15.6507	11.9949	33.5354	57.3812	533.976	44.9576	15.9111	14.7307	47.0129
7	1	2	0.222222	1	0	0	1	0	28	1.10707e+06	968148	-0.857625	-0.555169	1.24471	444.377	60.9795	16.4957	4.98077	3.52329	3.31479	494.343	67.3732	14.2267	6.02419	8.46115	9.66285	579.898	55.8876	12.7013	5.95485	5.90743	5.25545	106.649	24.7521	15.264	5.53788	5.29105	4.99352	123.935	21.5421	10.461	5.222	15.623	24.8173	132.499	16.6181	10.1625	7.7055	19.0767
7	1	2	0.259259	1	0	0	1	0	28	1.47069e+06	1.32266e+06	-0.473111	-0.188564	1.20675	356.117	57.5471	19.8125	5.48903	3.98923	5.21806	422.838	63.5268	15.0839	7.52509	7.79642	16.2091	451.193	62.501	16.4188	5.27444	11.2552	13.8431	108.262	22.6694	21.4747	7.50776	6.65378	8.6544	137.255	23.3739	15.6124	13.979	15.5797	35.8995	153.624	31.8046	28.611	31.8181	60.9153
7	1	2	0.296296	1	0	0	1	0	28	1.86308e+06	1.42816e+06	-0.059684	-0.071694	1.23785	606.842	78.2125	19.0316	5.37255	2.46773	1.6692	699.933	90.2274	17.5363	5.90511	2.91102	3.40002	716.739	78.4953	18.2982	5.58627	2.47446	2.28357	165.833	30.8674	19.542	5.66677	4.27978	2.61209	186.577	31.4272	15.5681	5.4648	3.78991	5.19769	181.51	24.628	10.7624	4.93061	4.78725
7	1	2	0.333333	1	0	0	1	0	28	1.22901e+06	1.06091e+06	-0.6729	-0.426647	1.18015	266.315	56.0802	14.8469	4.23722	3.17407	1.14282	232.191	50.9635	11.528	3.81739	2.51967	1.48572	385.513	51.7462	13.8637	3.88364	2.9707	1.79359	77.2672	28.2477	16.93	4.96009	5.62376	1.86858	64.5339	21.6879	13.594	3.89694	3.54231	1.16714	102.468	18.2853	12.4412	3.09601	3.38491
7	1	2	0.37037	1	0	0	1	0	28	1.44558e+06	1.4335e+06	-0.435274	-0.042772	1.21981	291.324	54.1102	17.4774	5.68469	3.04517	2.44832	298.243	55.8582	14.4422	5.5686	4.86169	5.64441	470.923	64.9329	17.1266	7.65449	5.57773	8.25575	87.5976	23.2032	18.5216	7.0875	5.23674	3.83041	86.5361	25.2818	15.1067	5.98564	7.02753	13.4072	122.971	24.1363	11.0393	10.5845	15.0442
7	1	2	0.407407	1	0	0	1	0	28	1.47639e+06	1.20268e+06	-0.383496	-0.261863	1.21708	203.8	48.0224	11.7771	3.28359	2.84345	1.02075	320.521	57.1612	10.926	3.64206	2.53487	1.43231	301.655	52.4865	11.4707	3.48911	2.2483	1.56258	53.2823	21.5682	11.6447	4.96474	5.09251	1.71334	76.6593	18.809	10.2634	3.48638	3.92545	1.16451	69.5793	16.159	7.77575	2.87488	2.15697
7	1	2	0.444444	1	0	0	1	0	28	1.50448e+06	1.57162e+06	-0.334415	0.118682	1.22523	713.31	62.5019	21.0191	4.82978	5.11419	5.56859	864.65	80.7555	21.0196	6.10211	9.97178	22.5768	831.478	60.7013	17.7358	8.17174	14.59	19.7143	172.264	24.0156	19.0273	6.43103	9.13246	9.26391	192.609	25.7585	16.7104	10.974	24.0687	55.2296	190.884	18.7617	15.3816	22.2838	90.0058
7	1	2	0.481481	1	0	0	1	0	28	870328	839898	-0.947575	-0.601466	1.23716	207.685	50.4138	13.2804	3.60749	2.5208	1.12613	277.426	66.9932	14.2855	3.60856	2.25076	1.43514	245.511	38.2675	9.97743	3.4162	2.12214	1.63734	60.0642	20.1788	11.7861	4.35937	4.56001	1.92564	74.4696	20.8558	10.3523	3.63405	3.53895	1.57065	58.7849	12.3384	6.41799	2.65383	2.16408
7	1	2	0.518519	1	0	0	1	0	28	1.44844e+06	1.03842e+06	-0.348441	-0.39149	1.26049	321.871	66.2018	19.8276	5.5236	5.42414	4.00018	472.584	80.6715	18.5346	6.08502	7.56704	10.3983	437.059	74.8211	22.3656	6.48727	10.6499	10.1075	81.5146	21.0038	17.8386	6.76441	8.53325	6.63469	115.636	23.6833	14.3898	8.77277	18.2683	29.9006	97.8653	19.9676	13.8784	15.2324	73.0006
7	1	2	0.555556	1	0	0	1	0	28	1.50749e+06	1.04764e+06	-0.268446	-0.370465	1.25	205.122	51.101	15.095	4.95518	4.18152	4.12402	316.851	61.9354	15.3255	5.13278	7.18261	7.8813	234.014	49.5412	13.4168	5.57694	5.99513	10.07	62.8074	18.131	13.5662	5.27119	6.5413	6.54353	85.3517	18.0276	11.7249	7.22509	11.804	23.2507	69.3751	13.9405	13.2181	32.2313	75.0366
7	1	2	0.592593	1	0	0	1	0	28	1.92292e+06	1.76911e+06	0.167971	0.362655	1.25447	483.339	106.66	25.0519	5.8434	4.84993	5.16325	479.186	116.592	21.7379	5.95717	5.7033	7.66023	721.686	101.891	24.2704	6.15053	6.00251	8.98249	127.357	33.0911	17.3018	7.5179	7.33723	6.56303	126.291	33.3981	12.7599	6.75215	7.69648	9.59866	163.418	28.5554	13.4373	20.7619	63.4943
7	1	2	0.62963	1	0	0	1	0	28	1.26023e+06	1.16863e+06	-0.473829	-0.225703	1.21366	293.802	58.4619	14.281	4.85677	2.9025	2.06521	364.024	60.1311	14.2406	4.72957	3.21038	3.22316	363.932	69.0233	14.576	4.9335	2.61559	2.87442	87.7309	20.2722	11.999	5.1449	5.12804	3.97195	97.8014	17.7382	9.93778	5.92881	5.7697	6.26834	94.1625	16.9658	8.42691	4.939	10.1115
7	1	2	0.666667	1	0	0	1	0	28	1.92127e+06	1.47553e+06	0.208124	0.093187	1.1853	295.563	66.69	15.7024	4.33364	2.91411	1.49181	374.288	76.2348	15.1348	4.41297	2.81013	2.29835	470.948	70.5273	16.2662	4.34581	2.65206	1.86454	71.6197	21.3111	13.6945	5.34431	5.52675	2.7211	84.1177	19.198	10.5619	4.19433	3.96742	2.94899	106.744	18.1165	9.51903	3.69339	3.8078
7	1	2	0.703704	1	0	0	1	0	28	1.39038e+06	1.04681e+06	-0.301595	-0.324881	1.28582	297.609	60.5036	18.7389	4.65357	2.43577	1.47634	351.391	71.5592	16.1986	4.44142	2.32842	1.81846	412.22	53.9662	14.9967	5.27958	2.53202	1.92805	80.0729	23.0553	18.5329	5.82652	4.31797	2.41196	88.7023	21.9545	11.6203	4.62088	2.96571	2.12605	97.1151	16.5706	9.70478	4.62608	3.61147
7	1	2	0.740741	1	0	0	1	0	28	1.96738e+06	1.63628e+06	0.296338	0.276517	1.26354	265.999	68.9249	18.0774	4.48926	3.123	2.75609	272.515	72.333	14.1512	5.12417	3.97373	5.67941	518.538	70.5888	18.9237	4.62669	4.64986	4.90371	73.922	26.0646	14.0764	6.20752	5.00647	4.58439	77.488	24.0697	11.0871	6.04327	7.78196	13.9777	118.341	19.483	10.303	11.1403	12.0819
7	1	2	0.777778	1	0	0	1	0	28	1.3882e+06	1.05495e+06	-0.261982	-0.292542	1.20846	251.756	61.018	16.0872	4.0549	2.92464	1.32367	286.559	68.2884	13.9921	3.91228	2.43375	1.40504	302.836	54.5679	13.6165	3.86348	2.60162	1.56327	69.9524	21.5514	11.8781	5.11381	5.05243	2.0664	78.9864	20.8637	10.7941	3.8785	3.67195	1.58483	74.8621	15.2101	7.40691	3.34388	4.27851
7	1	2	0.814815	1	0	0	1	0	28	2.04588e+06	1.77793e+06	0.416676	0.442063	1.21472	473.107	105.113	19.5631	4.87692	3.77842	3.86843	518.079	111.185	17.501	4.81726	9.36547	14.0915	636.031	100.458	19.8768	5.7399	7.73715	10.4425	106.086	30.21	15.472	6.55406	6.8185	6.21225	133.602	29.5709	13.5089	7.7556	18.9862	25.0427	154.402	25.4756	12.4192	18.4623	35.8514
7	1	2	0.851852	1	0	0	1	0	28	1.41874e+06	1.34102e+06	-0.189561	0.0172	1.18132	265.075	51.8156	13.2817	4.15495	4.30354	4.03035	284.036	49.9502	12.5107	4.66879	5.31093	7.29307	381.152	46.2686	13.5331	5.62148	9.99829	16.1306	77.9104	25.1259	12.1254	5.20953	8.18224	6.37883	80.3815	21.7062	10.7564	6.20318	9.54759	26.9471	124.756	19.0513	11.3692	26.889	80.4746
7	1	2	0.888889	1	0	0	1	0	28	1.74261e+06	1.13646e+06	0.15526	-0.175535	1.16884	209.974	42.8715	11.9889	3.53309	2.98466	1.12142	218.47	36.127	10.1088	3.26082	2.34528	1.39477	337.776	49.3207	13.3263	3.62659	2.34728	1.23961	55.9263	19.1248	10.9914	4.04912	5.72184	2.08611	57.8067	14.7939	10.2381	2.86952	3.69013	1.47677	77.0035	14.1393	8.20328	2.81408	2.91516
7	1	2	0.925926	1	0	0	1	0	28	2.28946e+06	1.91553e+06	0.723223	0.614509	1.23843	737.428	112.703	22.6782	5.78483	2.99574	1.98555	980.76	120.324	24.5685	6.21079	3.67492	3.37348	796.391	109.831	22.7172	5.49161	3.64433	3.34043	157.207	34.5122	18.9502	7.05463	5.86715	3.24578	228.199	36.8466	15.2358	6.69979	6.85906	5.4692	166.273	31.8283	15.5221	10.0302	13.6193
7	1	2	0.962963	1	0	0	1	0	28	1.7278e+06	1.17263e+06	0.182627	-0.11718	1.28468	300.832	67.9536	13.3881	4.03294	3.15161	1.16417	394.096	68.5566	12.3946	3.90323	2.54519	1.48122	352.591	67.9549	12.1124	4.14671	2.64548	1.52501	84.4584	24.1682	12.2333	5.01295	5.18636	2.04756	99.7614	21.4975	11.6708	4.07813	3.84105	1.36643	80.4755	17.9061	8.21386	3.1358	2.60198
7	1	2	1	1	0	0	1	0	28	1.79474e+06	1.27157e+06	0.270518	-0.006441	1.27535	563.65	84.37	18.0295	5.31009	4.53483	2.51926	721.96	102.161	18.1409	5.90452	5.88751	6.61283	617.761	69.0167	16.872	5.65109	6.51662	7.41892	122.257	30.8376	16.2823	6.79018	7.75161	4.65303	168.479	33.0132	15.667	7.20072	12.4609	13.6641	147.332	25.6366	12.6898	15.1029	48.2003
8	0	0	0.037037	1	1	0	0	0	44	6.50754e+06	7.91535e+06	0.92019	2.9963	0.816612	89.5074	17.8914	7.47801	4.86923	3.92041	1.95546	104.324	15.8052	8.03558	5.52014	5.14036	3.17034	79.9866	18.4287	6.16555	5.17694	9.36177	6.97076	56.7343	13.6739	8.2068	5.55486	5.12166	2.36331	64.0749	11.7585	6.74792	5.42786	4.46758	2.88572	38.7008	9.92463	5.99556	4.83664	5.17484
8	0	0	0.074074	1	1	0	0	0	44	6.01912e+06	7.34169e+06	0.591628	2.4827	1.06279	167.818	34.7522	13.7932	8.95142	7.1674	4.6614	141.196	24.9084	16.8426	8.75994	14.2	15.6263	206.628	40.635	14.1746	12.2363	25.6635	28.6318	80.1074	18.4412	12.8356	9.88	7.83568	4.48949	83.9096	16.3616	13.6037	8.23131	7.45518	6.49113	65.5475	16.1392	12.5889	13.4148	20.3773
8	0	0	0.111111	1	1	0	0	0	44	6.82251e+06	3.17926e+06	1.55382	-1.61432	0.796405	114.492	22.5804	10.1477	6.4925	3.63941	1.19166	97.5296	16.1299	10.8336	6.81422	3.97353	1.38877	130.297	22.4708	6.84622	7.0384	6.44792	4.75567	62.9329	16.7502	10.886	7.40809	5.11353	1.83037	58.4913	13.3178	9.64228	6.3606	3.89535	1.2313	54.4571	12.9189	6.84542	6.1241	4.18705
8	0	0	0.148148	1	1	0	0	0	44	6.18672e+06	3.23651e+06	1.07743	-1.49464	0.81423	244.296	39.5899	12.0085	7.99667	3.80733	1.4815	205.997	31.7279	11.1994	8.11204	4.22857	1.7041	279.486	40.8507	10.41	8.76504	8.01448	8.88765	110.518	20.4249	11.9471	9.22451	5.50456	2.11014	113.419	18.977	10.6838	7.76764	3.84465	1.39061	99.5239	16.0937	8.0163	8.58921	5.56659
8	0	0	0.185185	1	1	0	0	0	44	6.6665e+06	5.6289e+06	1.7166	0.960209	0.830808	148.929	32.3719	9.99514	6.41081	3.49729	1.34173	142.282	27.6065	9.40475	5.96812	4.04502	1.90353	174.988	33.615	8.2225	6.80814	9.96037	7.29132	68.3183	17.5029	10.6496	7.99894	4.58557	1.78459	76.4899	17.004	8.2662	6.36777	3.27468	1.37538	59.6311	14.0644	8.31414	6.67936	3.53755
8	0	0	0.222222	1	1	0	0	0	44	5.73338e+06	4.84373e+06	0.956499	0.168591	7.46298	161.711	31.7175	12.0586	7.83419	3.81122	1.20406	169.866	28.217	10.6633	7.14145	4.39266	1.49875	190.371	33.2108	9.5378	7.2177	9.43357	6.42516	71.3732	16.1877	12.8998	9.59766	5.63666	1.79125	87.6534	16.4554	9.8277	7.21043	3.99778	1.26788	59.2878	13.418	8.78668	6.71712	3.95825
8	0	0	0.259259	1	1	0	0	0	44	5.23873e+06	4.30411e+06	0.615325	-0.278676	4.6092	135.144	25.862	8.86315	5.71568	3.39203	1.1516	114.393	19.9846	7.75371	5.87795	4.4044	1.62713	165.602	25.9342	7.53584	5.72396	10.0946	5.7469	66.7875	16.3681	10.131	6.60863	5.39152	1.71255	67.8398	14.5304	7.48817	5.6505	3.58562	1.20838	57.8148	12.6686	7.10512	5.43903	3.64425
8	0	0	0.296296	1	1	0	0	0	44	4.96059e+06	4.64842e+06	0.488596	0.168355	0.759044	158.556	32.6194	9.46819	8.53695	4.19804	1.24019	149.156	28.3594	8.81354	8.50405	5.42945	1.85509	166.86	29.9071	8.0554	8.41132	10.5892	6.36028	73.4463	21.0978	10.3801	9.30132	5.85504	1.80101	83.8971	19.6594	8.04217	8.33713	4.69589	1.31829	62.7074	15.5132	7.49456	7.08766	3.56421
8	0	0	0.333333	1	1	0	0	0	44	5.23702e+06	5.47117e+06	0.924544	1.05292	0.837597	154.785	32.5379	13.864	8.20689	3.89284	1.9252	163.05	31.1786	15.0476	9.9107	7.09718	9.71101	149.347	30.4639	10.9952	8.55072	8.07298	5.60208	79.8855	18.752	15.2139	9.70248	5.80105	2.47117	89.4277	20.2301	12.3421	9.35047	6.70134	7.0169	62.0498	13.8272	10.1888	8.44719	4.51304
8	0	0	0.37037	1	1	0	0	0	44	4.4507e+06	4.46606e+06	0.297472	0.110973	0.785898	141.548	25.121	11.4693	6.58314	3.14306	1.32492	144.343	23.4863	10.1413	6.92781	3.91331	1.72534	138.658	24.2604	9.13181	6.57119	7.01258	4.07732	73.642	14.7299	11.9056	7.32762	4.7712	1.9685	83.4434	15.0683	9.31609	6.40837	3.61602	1.70367	57.4394	11.2374	8.05993	6.30678	3.19881
8	0	0	0.407407	1	1	0	0	0	44	3.65465e+06	3.48558e+06	-0.339221	-0.806879	0.785432	144.019	26.9061	10.1547	6.23066	3.4706	1.20066	152.05	26.0486	9.03601	5.95561	3.88899	1.59391	132.688	23.1052	7.76083	5.96918	8.60333	4.37773	68.4407	16.5705	10.6584	7.0543	5.51719	1.90317	85.3647	16.582	8.84473	5.92353	3.43077	1.31762	52.1423	11.4424	7.26184	4.79342	3.71213
8	0	0	0.444444	1	1	0	0	0	44	3.62475e+06	2.98956e+06	-0.208578	-1.24628	1.36244	164.423	33.021	11.1389	7.97123	4.30878	1.35867	164.662	26.6493	10.2151	7.58386	5.02486	1.79378	185.266	30.87	9.09214	8.07004	11.4926	7.70417	75.0538	20.4045	12.0309	9.18842	6.21238	2.07074	89.6874	17.9409	9.52248	7.26902	4.39618	1.30251	64.6687	14.5075	7.64681	7.40451	6.04662
8	0	0	0.481481	1	1	0	0	0	44	3.80764e+06	3.69912e+06	0.132604	-0.468752	0.849443	172.835	38.6082	14.64	7.9786	4.27523	2.05507	173.055	32.6631	12.7718	8.65395	6.66804	6.47819	179.028	38.3876	11.665	8.94146	11.149	8.54393	72.0277	17.7392	14.1848	8.57813	5.33895	2.27626	87.9929	18.7429	12.0304	7.71404	4.54815	2.89243	59.3187	14.9044	10.2949	7.49483	4.75178
8	0	0	0.518519	1	1	0	0	0	44	2.91205e+06	3.28803e+06	-0.603703	-0.816844	0.813194	103.478	20.8945	9.20219	5.8999	4.1153	1.31785	95.8066	18.834	7.86077	6.62991	4.92227	2.17311	103.319	18.5204	6.78965	6.12061	7.85412	4.06287	58.9736	15.4424	9.94025	6.69192	5.92044	1.9003	59.2726	12.9765	7.87057	6.11041	4.05308	1.47703	46.8864	11.5478	6.44418	4.94679	4.22963
8	0	0	0.555556	1	1	0	0	0	44	3.62498e+06	4.82864e+06	0.268493	0.786851	0.76985	136.041	31.8837	12.3939	6.95815	4.55249	1.98086	150.631	29.5667	11.6348	7.08138	5.73559	2.63323	141.787	28.6888	9.82295	8.11441	9.86834	9.551	68.56	21.2698	12.0664	7.67154	6.4717	2.50414	84.1704	19.6353	9.99983	6.79701	4.63136	1.81977	55.2987	15.6882	8.26919	6.11031	6.25874
8	0	0	0.592593	1	1	0	0	0	44	2.67045e+06	5.11425e+06	-0.526583	1.13458	0.818257	155.766	26.1408	11.0792	7.43636	6.66885	5.92378	168.092	22.0735	10.0497	8.45061	14.4916	13.0889	163.425	26.7327	10.6315	12.2205	28.7018	41.574	69.76	17.4169	11.0396	8.44894	8.3491	5.90084	90.4789	14.6855	8.81187	7.45168	6.94219	5.9887	55.7999	13.4342	9.66926	13.8913	24.684
8	0	0	0.62963	1	1	0	0	0	44	2.39254e+06	4.51949e+06	-0.645101	0.602248	0.837203	169.476	28.0179	12.4249	7.40814	5.34537	2.95538	175.961	22.6729	11.3435	7.87517	8.14359	5.85783	162.778	26.9874	10.0079	9.25164	14.8798	19.101	77.3461	15.4729	11.9656	8.91863	6.88703	3.16768	95.4336	13.5597	9.78507	7.06477	5.19095	3.05049	58.8733	11.6767	9.18446	8.93135	9.13801
8	0	0	0.666667	1	1	0	0	0	44	2.55773e+06	5.11989e+06	-0.320521	1.26508	0.856317	213.803	34.7793	12.6627	9.63315	5.42151	1.97144	190.225	28.1337	10.5814	8.61419	6.31832	3.23604	231.549	36.9549	10.975	9.96295	14.2476	12.1994	82.747	19.8499	12.8507	11.1953	7.78385	2.55285	94.0825	18.3013	9.84653	7.90074	5.05644	1.70895	74.0815	16.9841	10.7374	10.1352	9.18283
8	0	0	0.703704	1	1	0	0	0	44	2.116e+06	4.30674e+06	-0.602874	0.514438	0.867579	130.962	26.2991	10.6797	7.3493	5.12891	1.56473	97.3335	19.959	9.34664	7.45362	7.52958	3.10481	155.984	25.9222	7.80379	7.18866	12.0581	7.69066	56.9838	17.1739	11.7989	8.70726	8.34643	2.18641	55.2177	14.2556	9.37712	7.30522	5.16099	1.69251	50.5457	13.4942	6.83997	6.36259	5.04607
8	0	0	0.740741	1	1	0	0	0	44	1.56969e+06	4.01655e+06	-0.989987	0.287665	0.791184	100.181	16.0284	12.1295	6.15646	3.99994	1.41399	122.322	17.1393	11.9726	6.47252	6.95358	3.01956	87.29	13.37	7.82301	7.16914	9.9751	5.46153	66.9136	13.0186	13.9506	6.98165	5.75336	2.14851	78.1642	11.6916	11.7629	5.73807	4.47533	1.56445	46.909	8.94239	8.40909	5.68297	3.61221
8	0	0	0.777778	1	1	0	0	0	44	1.63518e+06	3.28339e+06	-0.765219	-0.382478	0.7543	133.947	27.5174	10.6234	6.97218	4.33749	1.46278	122.841	22.7189	10.3435	6.81968	6.79577	3.08925	165.767	27.8522	7.50733	7.71123	9.82864	5.9044	63.5761	19.4627	12.7816	8.9222	6.78054	2.20513	68.6793	16.4366	9.91403	7.16253	5.11418	1.6455	60.4496	14.787	7.78064	6.93031	4.5034
8	0	0	0.814815	1	1	0	0	0	44	1.24427e+06	3.23415e+06	-0.996684	-0.369536	0.796671	176.995	40.2084	19.7213	10.1974	6.60209	4.69384	172.961	29.9506	18.3894	16.4046	20.7019	29.3418	215.269	46.2808	18.4743	13.0481	19.7305	27.3176	75.8388	20.1896	16.8524	11.5931	7.49495	4.64045	91.7214	18.1798	14.4917	11.1774	11.537	14.7993	67.698	17.7266	14.4028	13.2262	15.7592
8	0	0	0.851852	1	1	0	0	0	44	1.55449e+06	3.37416e+06	-0.527105	-0.166935	0.800357	238.006	45.7181	12.9846	9.9153	9.14823	8.32708	279.056	39.4535	13.6685	25.5739	57.5068	80.8022	250.709	47.5275	12.1976	13.5906	36.0773	53.5979	104.931	22.4305	13.0641	10.7941	8.76318	6.81567	145.858	23.3725	10.5866	14.9886	20.3467	25.4022	88.0309	18.5306	10.2941	12.8744	24.2155
8	0	0	0.888889	1	1	0	0	0	44	1.02554e+06	2.49782e+06	-0.896679	-0.98075	0.809544	101.618	22.8742	8.60452	6.40883	4.43775	1.92647	109.237	17.8244	10.8562	18.2188	25.046	49.5776	105.511	22.5042	7.38059	6.97867	11.0255	7.23853	55.094	16.8498	10.1573	7.1751	5.94172	2.18926	63.8275	13.7493	8.39663	7.4448	6.42551	7.3136	42.7052	12.8194	6.93055	6.61035	5.3433
8	0	0	0.925926	1	1	0	0	0	44	1.12496e+06	2.76684e+06	-0.63785	-0.649391	0.836891	146.853	37.0885	10.8193	7.03366	4.04476	1.2646	136.228	29.5404	11.5755	10.3029	14.9805	18.6274	171.112	38.0319	8.98294	6.7678	10.0843	5.50759	66.0006	20.243	12.7527	8.42676	5.70336	1.82586	74.2508	18.2436	8.89268	7.18765	5.3179	3.17536	59.736	16.3234	9.21627	6.00981	4.00628
8	0	0	0.962963	1	1	0	0	0	44	1.46155e+06	2.5656e+06	-0.141915	-0.787976	0.834285	135.497	24.5698	9.65753	6.52834	3.68825	1.11008	100.447	19.6267	9.51564	8.99057	11.4399	11.193	160.14	24.4708	8.18819	6.55134	10.636	6.91856	69.7812	14.906	9.85855	7.30301	5.16144	1.55859	62.6794	12.7005	7.04939	5.96426	4.46716	2.09886	59.9944	11.6049	7.43785	5.61135	3.50159
8	0	0	1	1	1	0	0	0	44	2.45164e+06	3.0337e+06	1.00756	-0.257405	0.84924	173.642	23.3442	10.4908	8.03474	5.17386	3.98371	162.136	20.9081	11.6948	11.2759	13.9657	23.7392	189.276	23.777	8.83839	9.65999	17.0112	23.3059	81.3413	16.1771	12.4547	8.72204	7.34809	3.7248	89.5782	14.3157	10.3606	8.40798	8.53486	10.1156	67.2246	12.9495	8.81611	8.47037	12.1715
8	0	1	0.037037	1	0	1	0	0	44	2.45904e+06	2.34789e+06	0.481894	0.419797	2.7563	184.818	31.3589	14.227	6.99274	4.25119	2.02264	206.935	27.2814	13.5755	14.9213	18.4285	30.2472	183.529	30.3057	10.7652	8.77743	15.8623	12.2813	100.073	15.8205	13.5977	8.48654	5.93282	2.52534	117.57	15.5291	11.3681	8.56559	7.96989	10.3087	76.7974	12.9282	9.23797	7.26433	5.4093
8	0	1	0.074074	1	0	1	0	0	44	2.11174e+06	1.88596e+06	0.144469	-0.014373	2.45896	149.089	32.72	8.82838	7.2804	4.48701	1.55408	137.808	27.9521	10.4633	10.0418	12.1514	12.2546	138.05	31.6001	6.69977	8.39991	15.5485	11.2849	77.1394	18.217	10.6765	8.90299	6.63148	2.04135	79.4734	17.3462	8.78719	7.89554	7.30089	4.28179	55.6339	13.8816	6.56164	7.30706	4.81413
8	0	1	0.111111	1	0	1	0	0	44	2.44468e+06	2.94106e+06	0.487309	1.06836	2.1731	241.499	47.5894	14.5121	9.3265	5.37015	4.04369	231.493	40.6022	15.7759	13.0338	16.8121	25.719	239.901	44.2639	12.7345	11.8184	22.3133	25.181	110.582	23.1826	14.8959	11.2394	6.67125	4.03218	128.126	23.2573	12.706	11.8151	10.6698	12.8748	89.9516	19.1161	11.4852	10.8252	11.6758
8	0	1	0.148148	1	0	1	0	0	44	1.17697e+06	1.53349e+06	-0.770148	-0.3134	2.063	119.211	27.0884	11.9204	9.18996	3.8989	1.13953	103.036	20.7898	10.5902	8.43293	4.43605	1.6111	140.222	27.2438	9.19841	10.0409	15.6239	10.0614	62.6077	18.9179	13.0337	10.3214	6.70975	1.82606	61.7492	14.8579	10.4907	8.50065	3.98337	1.23333	53.3126	14.6082	9.03211	7.90336	4.57824
8	0	1	0.185185	1	0	1	0	0	44	1.30833e+06	1.94186e+06	-0.62902	0.123256	1.71484	120.063	22.7813	10.9887	8.67861	3.77571	1.21526	110.211	20.1149	7.93648	8.92467	4.92197	1.57019	126.567	20.6111	10.0026	10.258	15.647	10.0333	64.9812	15.9728	11.3466	10.7123	6.18525	2.04266	67.5993	14.6506	7.50672	8.64185	3.9069	1.28236	53.6932	11.9649	9.10246	8.70142	4.58262
8	0	1	0.222222	1	0	1	0	0	44	2.51104e+06	1.69731e+06	0.586207	-0.106895	2.69992	164.958	38.5453	12.7748	9.58794	5.09417	2.56073	153.671	29.8152	12.7592	9.88596	7.06056	5.16827	200.414	41.3749	10.5204	11.7844	21.7034	18.6961	67.3135	19.6798	12.8994	11.3482	6.68849	3.10874	78.5763	18.3781	11.4498	9.73164	4.92224	2.42269	63.9461	17.2528	10.2146	13.09	10.5417
8	0	1	0.259259	1	0	1	0	0	44	1.71758e+06	1.43801e+06	-0.198275	-0.333936	1.97036	121.095	22.6899	13.3058	8.33013	3.8511	1.40413	135.394	19.4704	11.8613	7.28646	6.13944	3.01964	138.761	25.0241	9.95615	10.292	13.5129	8.80757	70.0921	15.1805	15.1219	9.39241	5.81076	1.99496	80.9642	13.7697	11.9926	7.23097	4.51688	1.86501	55.8025	11.3816	9.91629	7.84734	3.86122
8	0	1	0.296296	1	0	1	0	0	44	1.40589e+06	836787	-0.49623	-0.926895	3.54498	103.244	25.9935	10.8627	7.27877	4.20545	1.09071	84.6655	18.3023	10.056	8.11922	4.90184	1.83932	124.085	26.0799	7.4926	8.20543	16.3943	9.15446	51.2806	17.4537	11.9457	7.62037	5.6851	1.67245	49.9959	13.9536	9.72044	7.27165	3.86861	1.29918	42.7403	13.6615	7.96433	5.99985	3.89091
8	0	1	0.333333	1	0	1	0	0	44	1.24034e+06	1.1508e+06	-0.654933	-0.569858	1.78143	120.347	26.4431	8.44898	5.18112	4.31558	1.1102	104.179	21.2741	8.0324	5.27651	4.88017	1.84169	128.243	26.1325	6.19788	7.147	13.0412	7.98194	67.9334	19.3642	10.5142	6.13639	7.46327	1.82018	66.3031	16.2695	8.21181	4.78612	4.3871	1.29683	56.5921	14.2241	6.32339	4.95148	4.75068
8	0	1	0.37037	1	0	1	0	0	44	1.74235e+06	987070	-0.142828	-0.706954	1.5925	125.338	27.6492	11.2267	7.26715	4.03749	1.23548	127.487	23.8	10.6299	7.18534	5.1767	2.12808	134.366	28.0734	8.68854	7.85865	16.2422	13.1348	58.1101	16.0726	11.9547	8.4894	6.37693	1.74892	70.7966	15.2836	9.67349	6.41197	4.09457	1.3408	47.536	12.2615	7.52721	6.23623	4.28998
8	0	1	0.407407	1	0	1	0	0	44	1.26833e+06	1.56754e+06	-0.599328	-0.137358	5.00429	112.425	17.1633	11.0353	6.69025	3.64606	1.14054	89.5043	13.8545	8.42148	6.03369	4.95556	1.98664	136.397	16.8734	8.93108	7.85212	15.5446	10.0404	60.8916	13.9406	13.6704	8.01996	5.54499	1.59446	55.178	11.1553	8.88129	5.86708	3.82743	1.26307	53.319	10.6131	9.95748	6.3983	3.8844
8	0	1	0.444444	1	0	1	0	0	44	2.56111e+06	3.13422e+06	0.697493	1.48655	1.87721	181.924	28.6314	9.74418	8.46988	6.55258	5.55106	162.859	23.3419	14.8836	12.7136	28.7789	49.3434	243.361	31.1066	9.13756	14.9637	26.1922	31.8144	83.9849	18.5275	10.1028	8.61491	8.30581	4.82246	90.0619	15.9966	12.1959	11.0989	16.6877	25.0425	81.2996	13.89	8.36973	13.3869	15.356
8	0	1	0.481481	1	0	1	0	0	44	1.97452e+06	1.82132e+06	0.125836	0.175829	4.03611	112.908	25.8893	11.6407	7.42466	3.73749	1.15005	104.17	21.9229	9.73991	7.95791	5.32255	1.96964	126.826	24.7922	9.0209	8.71695	12.9354	8.43057	60.2753	16.3237	12.3367	8.71287	5.52671	1.89318	60.9356	14.2404	9.32849	6.97674	4.20014	1.31631	52.3799	12.5317	8.35777	7.12963	3.77073
8	0	1	0.518519	1	0	1	0	0	44	1.32214e+06	972763	-0.517165	-0.642513	3.50272	156.617	29.8222	14.4517	9.55956	7.13709	7.85263	119.438	18.9699	14.3424	18.0334	33.0318	50.7198	199.053	35.2045	13.0696	15.3921	30.333	46.5241	69.8797	17.5802	14.1436	11.2133	9.0139	6.71219	71.4533	14.3248	13.3778	14.7398	16.1034	28.5541	66.8367	15.9439	11.1449	13.2054	23.0121
8	0	1	0.555556	1	0	1	0	0	44	1.30629e+06	706055	-0.526053	-0.86676	1.79375	104.739	21.6365	9.7661	8.03862	4.88491	1.05569	101.662	18.3811	8.24011	8.18621	6.37035	1.72912	100.214	18.9874	7.69659	8.23021	14.9352	8.15471	59.6974	16.1383	10.554	9.40035	7.49999	1.64405	61.8616	14.0552	8.42907	8.07813	4.6233	1.07684	45.397	11.1249	7.26962	6.26316	4.39866
8	0	1	0.592593	1	0	1	0	0	44	1.70358e+06	1.46078e+06	-0.114366	-0.107127	3.69034	170.362	33.0547	13.7678	9.73278	4.37453	1.16738	132.141	24.6224	11.9155	8.68611	5.89982	2.4041	203.512	34.718	11.4255	9.83589	16.8554	10.6378	75.2921	20.0608	13.2769	11.984	6.93155	1.92165	74.2492	16.0054	10.4126	9.13651	4.29033	1.2311	68.2361	15.9803	10.1926	9.77597	4.73535
8	0	1	0.62963	1	0	1	0	0	44	2.92155e+06	2.38036e+06	1.11011	0.857199	1.76207	146.547	27.1545	14.8948	8.04816	5.39998	1.87427	136.294	21.3635	12.7592	7.98499	7.52688	3.14179	160.205	27.2495	12.0468	10.2129	17.7978	13.4341	71.4369	16.9764	14.9539	9.29321	6.70633	2.3087	77.547	14.2708	11.7168	7.7388	4.97367	1.77855	59.7619	13.5257	11.1561	8.09357	7.50348
8	0	1	0.666667	1	0	1	0	0	44	2.37595e+06	1.58241e+06	0.574984	0.083976	1.75582	164.189	24.1446	12.9203	8.37335	3.48413	1.16548	165.887	21.3979	10.9819	8.55232	4.83995	1.89968	186.029	27.3404	10.4873	9.00884	13.9239	8.38091	75.9034	15.4139	13.0314	10.1693	5.58349	1.76766	91.4339	13.9518	10.6829	8.23623	3.87721	1.15033	65.443	12.8925	9.72107	8.51105	3.98344
8	0	1	0.703704	1	0	1	0	0	44	1.72174e+06	1.00615e+06	-0.060136	-0.511096	5.92932	102.354	22.0535	12.9197	8.75674	4.82808	1.26042	94.7612	18.6273	9.73543	8.47253	6.05203	1.89165	105.029	19.2009	9.62215	9.4441	14.3505	8.81383	64.4005	17.6921	14.523	11.3777	8.02107	1.98209	60.9833	14.8457	10.1598	8.3978	4.59013	1.28607	50.0799	13.1357	10.1206	8.85944	4.66879
8	0	1	0.740741	1	0	1	0	0	44	2.10502e+06	1.77063e+06	0.327193	0.310576	2.80633	152.885	30.9455	16.1228	8.88029	6.2056	3.27372	119.374	25.484	14.0581	10.5211	13.2889	11.5542	189.089	31.4331	12.5186	11.7349	22.2913	20.6411	74.5394	18.5895	16.3769	10.7106	9.46379	3.31864	70.8035	17.1093	13.1471	8.44303	9.33009	5.53119	69.7154	15.5144	10.9763	12.9532	17.1643
8	0	1	0.777778	1	0	1	0	0	44	2.08088e+06	1.46131e+06	0.311989	0.033756	2.05361	148.313	32.9072	9.06249	6.60525	4.64232	1.95815	158.118	29.8734	9.88396	7.41459	9.59732	9.03478	151.393	32.6632	7.40061	7.69056	14.3559	10.093	74.1998	20.3064	11.1912	7.7018	5.81357	2.18769	89.9394	18.6746	10.1247	6.42429	6.823	3.97895	57.7791	15.2997	7.32384	6.36018	7.25962
8	0	1	0.814815	1	0	1	0	0	44	1.62348e+06	1.57768e+06	-0.133177	0.165923	2.90458	152.137	33.638	12.5006	8.07801	5.98957	4.46874	157.346	29.829	11.2276	11.1098	18.987	18.0965	140.796	31.3425	10.7254	9.52414	27.5706	35.557	82.2228	19.6183	13.6109	9.27494	7.76053	4.09062	91.9075	19.5558	11.7551	9.66074	9.81568	7.92572	59.8905	15.6599	9.21178	8.7611	13.8966
8	0	1	0.851852	1	0	1	0	0	44	1.87954e+06	1.55734e+06	0.130826	0.183079	1.67266	80.6135	24.41	10.1383	6.75235	4.79097	1.2603	72.3684	20.2563	10.1544	7.41628	6.1204	2.24086	80.4146	21.5709	7.55272	7.10726	14.4112	10.0701	45.5134	17.1428	10.6244	7.35204	7.16192	1.88218	45.8761	15.143	9.71022	6.54356	4.5168	1.60313	35.5336	12.1976	6.54519	5.50101	5.47608
8	0	1	0.888889	1	0	1	0	0	44	1.93614e+06	1.70861e+06	0.204464	0.325906	4.85095	147.464	26.9194	11.1924	7.48022	4.29203	1.58861	131.982	22.5247	11.1459	7.38588	6.1421	3.49857	163.659	26.2598	8.71188	9.31354	17.057	12.0134	70.7685	16.8628	11.2006	9.21105	6.19648	2.10857	77.1478	14.9034	9.68452	6.79491	3.92712	1.69601	57.587	12.4148	7.56287	8.30334	6.86252
8	0	1	0.925926	1	0	1	0	0	44	1.47577e+06	1.28088e+06	-0.248005	-0.064089	3.59571	180.321	35.8604	13.7207	9.92565	4.72309	1.516	136.521	27.0364	11.8709	9.9343	6.45033	2.89041	205.096	39.0167	9.88316	9.05217	14.3085	9.69976	87.0154	19.4504	15.4019	11.8301	7.40984	2.16316	82.7283	17.6011	12.3065	9.01669	4.762	1.71572	74.1106	16.1173	9.95089	8.92872	5.02252
8	0	1	0.962963	1	0	1	0	0	44	1.60498e+06	912430	-0.111679	-0.390854	1.96093	148.411	31.9522	13.5918	8.50062	4.97938	3.34941	141.218	23.8983	11.6732	10.076	9.38612	8.31031	153.843	33.0853	11.3561	12.727	21.2786	26.1123	70.2952	18.8369	15.1875	10.784	6.57333	3.51456	77.7887	15.8026	11.4096	8.59978	5.31438	3.91749	58.6908	16.2443	10.8842	11.4123	12.9659
8	0	1	1	1	0	1	0	0	44	1.27658e+06	1.17916e+06	-0.429173	-0.101613	2.16706	142.894	24.3391	12.4811	7.93993	5.11735	3.29574	162.628	20.0154	17.7854	10.2864	17.4618	29.4053	161.324	30.7774	10.4476	10.3735	18.0972	16.2154	63.8415	14.0595	13.1537	9.66408	6.14372	3.19198	83.246	13.4729	13.9916	9.79389	11.9544	14.3	54.3458	12.1715	9.49225	8.70328	8.66893
8	0	2	0.037037	1	0	0	1	0	44	1.40502e+06	974200	-0.229381	-0.542514	1.71781	194.685	42.2674	10.5353	7.37346	4.52049	2.10433	206.458	34.4053	9.5325	12.634	14.6313	19.3109	235.834	51.4941	9.9892	7.02351	9.87779	8.25132	91.4254	19.0882	10.7056	8.77615	6.41669	2.82002	113.562	19.9261	7.86398	8.03659	6.33141	4.68333	77.7289	16.1226	8.35424	8.13394	9.1691
8	0	2	0.074074	1	0	0	1	0	44	1.74355e+06	1.3999e+06	0.107556	-0.099518	0.773937	209.495	43.2917	16.5912	9.0933	4.89919	2.71673	169.977	31.4501	14.9451	11.1251	17.3534	21.7651	255.221	51.2129	13.3568	9.01245	13.1151	12.5163	83.1728	19.3128	17.6017	10.2925	6.41534	3.14883	90.9865	18.2133	14.1079	9.16115	6.40362	5.96358	77.7774	17.489	12.4063	9.97429	11.6755
8	0	2	0.111111	1	0	0	1	0	44	1.58934e+06	1.70216e+06	-0.046338	0.210409	0.755661	125.323	25.5903	12.1579	8.54703	4.80094	1.75464	96.6268	19.7792	11.8636	18.1321	14.1566	25.7697	146.414	25.5889	9.34324	8.13143	11.3994	7.37099	68.824	16.1904	13.3435	9.50917	7.90563	2.36702	62.8043	13.6434	11.2403	8.34937	5.3889	3.20727	58.234	12.0355	9.35342	9.28856	6.9331
8	0	2	0.148148	1	0	0	1	0	44	1.35492e+06	1.2854e+06	-0.280381	-0.198999	0.766771	160.875	29.8069	16.4945	11.7271	4.30032	1.52144	115.662	21.8068	14.0439	21.138	20.3106	31.2646	191.748	30.5792	12.8156	11.5983	10.3724	6.41563	72.6848	17.9584	16.3361	13.7615	6.28973	2.02615	68.1055	14.9834	13.9223	11.445	5.01353	3.41514	68.4639	13.4985	12.0423	10.7803	5.39276
8	0	2	0.185185	1	0	0	1	0	44	1.45086e+06	1.25894e+06	-0.184101	-0.21795	0.763543	109.51	19.6108	12.5333	9.43302	4.95557	1.14612	95.3425	15.5055	11.2482	9.22113	9.6241	7.76833	113.614	17.1598	9.45569	8.04194	10.5997	6.63062	53.9161	15.107	13.566	10.8634	7.55283	1.69308	54.9631	11.7737	10.6911	8.25162	4.92999	1.61055	44.6013	11.117	9.75879	7.70144	4.73556
8	0	2	0.222222	1	0	0	1	0	44	1.35463e+06	1.50128e+06	-0.280023	0.032064	0.743904	150.909	26.644	13.9935	9.30436	6.54319	2.2065	111.755	19.6278	13.0261	9.31945	9.11551	6.83935	191.086	27.6977	10.2492	11.4063	18.2091	12.0584	74.033	19.87	14.6952	10.8336	9.75889	2.72209	66.444	14.9846	11.9496	8.73566	6.7366	3.05523	71.5557	16.1471	9.74487	10.8869	12.7665
8	0	2	0.259259	1	0	0	1	0	44	1.8724e+06	1.34688e+06	0.238136	-0.115059	0.761977	125.054	22.1207	9.54889	8.10478	4.19259	1.61364	97.3647	16.9586	8.54859	7.5732	5.63612	2.50642	139.595	22.7044	8.30638	9.41262	9.11739	7.25963	72.3431	15.9346	10.9795	8.81708	5.72565	2.31558	64.2646	12.747	8.43438	7.02673	4.28458	1.99845	62.9825	12.6789	8.14571	7.45129	5.2916
8	0	2	0.296296	1	0	0	1	0	44	1.73582e+06	1.90677e+06	0.101837	0.452703	0.723354	190.244	28.8952	13.1767	8.47178	8.61717	12.0067	175.027	29.9748	13.017	31.4185	66.7161	107.655	213.368	27.9051	11.5175	17.4717	37.6791	71.0816	91.1213	15.9222	15.4512	8.77069	8.69556	10.4771	97.7668	16.8668	11.81	10.3682	17.5671	21.5524	83.8144	13.603	13.4245	22.0906	46.5532
8	0	2	0.333333	1	0	0	1	0	44	1.63337e+06	1.59396e+06	-0.000262	0.147365	0.723175	125.106	26.0679	10.2739	7.25865	4.20987	1.98668	117.115	21.7435	10.8882	18.7711	19.9811	34.6936	133.864	25.8257	8.31426	7.39721	8.63418	7.35161	68.7049	17.3684	11.1166	7.84482	5.74649	2.31808	70.6886	15.4182	8.03521	7.67298	5.2497	3.88642	61.4779	13.6094	8.98986	7.98726	7.38951
8	0	2	0.37037	1	0	0	1	0	44	1.30376e+06	779964	-0.329469	-0.659427	0.748906	100.958	21.7742	12.8922	7.23613	4.08114	1.04404	111.388	17.7474	11.1254	7.96556	5.00991	1.74624	91.6877	21.5601	10.286	6.60702	5.60584	2.81779	67.7198	15.1824	13.701	7.77666	6.12952	1.77131	73.6176	13.0748	10.524	7.09295	4.11735	1.15868	47.9373	12.3396	9.2256	6.78792	4.3328
8	0	2	0.407407	1	0	0	1	0	44	2.23995e+06	1.69627e+06	0.607063	0.26439	0.745178	110.873	21.0168	15.4524	8.38858	4.38105	3.69803	108.561	17.0121	15.2208	11.4726	14.7632	16.7701	137.164	22.0928	11.557	8.65404	16.4503	20.3804	50.5841	13.9023	17.7357	9.04812	5.50624	3.33128	58.3597	11.8281	14.4178	8.91239	6.26554	6.13347	44.0451	10.6847	11.9342	7.78089	9.93938
8	0	2	0.444444	1	0	0	1	0	44	1.65785e+06	1.74953e+06	0.02529	0.325228	0.734346	173.945	36.2093	11.1234	6.93249	4.30354	3.04819	139.612	26.6889	11.5041	8.76862	7.40142	20.3201	211.339	39.6529	9.50814	7.5015	10.8771	10.5202	88.4639	19.9879	11.6008	7.7359	5.67666	2.73725	82.7358	16.8237	10.2021	8.17506	5.50895	12.0886	79.6312	16.7532	8.16058	7.50289	5.48583
8	0	2	0.481481	1	0	0	1	0	44	1.76167e+06	1.38519e+06	0.129515	-0.031899	0.759046	144.178	40.0404	10.8421	9.4056	6.89186	5.8379	145.043	34.5998	11.9812	11.9939	13.0586	19.8877	150.556	37.2709	10.5226	13.3273	36.0121	37.6574	69.1909	22.6013	12.0377	10.2916	8.00297	5.33148	76.0269	21.538	10.1007	9.55843	6.49171	8.22251	59.3831	17.572	9.50306	15.2681	28.1569
8	0	2	0.518519	1	0	0	1	0	44	1.6897e+06	1.04129e+06	0.057902	-0.368348	0.761617	120.027	26.6988	9.64229	6.1203	4.54323	2.20442	119.125	20.572	9.15948	6.78409	7.06416	5.72845	118.46	24.8886	7.56817	7.70191	10.0583	11.3264	71.8881	20.6438	11.5595	7.08561	6.37945	2.51592	72.6456	16.2397	8.84636	5.66987	4.31188	1.89542	53.292	14.8176	8.03009	7.29395	9.83819
8	0	2	0.555556	1	0	0	1	0	44	1.64364e+06	1.0274e+06	0.012238	-0.374994	0.783041	159.363	31.9542	9.02353	6.72337	3.26482	1.58859	158.681	28.7487	9.68026	7.45746	4.58413	2.75849	148.33	29.9816	6.74841	6.59847	5.1983	5.05572	79.5378	18.9195	9.67024	7.64525	4.66985	2.30325	89.1514	18.2904	7.75621	6.34572	3.42743	1.50245	62.345	14.122	6.49434	6.90739	6.31842
8	0	2	0.592593	1	0	0	1	0	44	1.02023e+06	1.10129e+06	-0.610509	-0.295225	0.935427	96.3542	27.3731	9.47529	7.38318	4.18156	1.39538	109.958	23.8106	8.24574	8.046	6.53759	3.04925	106.209	26.3166	7.56933	6.43891	5.95161	3.77711	47.0197	18.0406	10.9954	8.23977	5.87375	2.08713	59.4451	16.8715	8.07343	6.84915	4.05985	1.44004	38.3606	13.6571	7.63444	7.36032	5.71776
8	0	2	0.62963	1	0	0	1	0	44	1.04408e+06	1.35794e+06	-0.586097	-0.032134	1.03462	95.0387	23.2563	9.06083	7.14423	3.76564	1.10144	130.765	21.1064	9.40399	7.80896	7.22972	2.91619	92.5755	21.2047	6.84129	6.39262	6.70584	4.23676	58.9664	15.6387	11.1106	7.77355	5.85833	1.72061	76.1883	13.6036	8.92569	6.6988	4.52262	1.33109	43.6412	11.6577	7.14801	6.21685	3.55016
8	0	2	0.666667	1	0	0	1	0	44	1.55383e+06	1.61271e+06	-0.075544	0.227779	1.25779	153.919	38.855	13.6061	8.05234	5.53514	5.66745	147.392	36.6106	14.016	18.8712	34.1587	55.7724	176.015	38.1737	12.6674	11.6174	16.6254	30.3943	62.4631	18.5205	13.2896	8.96691	6.18956	5.19786	74.679	20.0609	11.5839	10.185	9.17851	12.7697	53.3698	14.8125	10.8503	12.6953	19.0742
8	0	2	0.703704	1	0	0	1	0	44	1.46569e+06	1.78134e+06	-0.163344	0.403962	1.24987	190.744	40.9138	14.6522	9.78999	4.46096	1.77766	177.315	36.3458	13.05	29.6507	17.4025	47.5247	184.745	38.0469	12.3907	8.60959	7.52918	4.37916	88.351	22.3456	14.9148	11.1376	6.15981	1.95404	100.883	22.0274	11.8711	11.724	6.47395	8.23526	70.1356	16.6017	10.9727	8.45025	3.60709
8	0	2	0.740741	1	0	0	1	0	44	1.25539e+06	1.48035e+06	-0.374312	0.115578	0.756496	177.224	35.5818	19.2125	9.57632	4.42568	2.63257	168.906	27.9383	15.5361	23.0405	20.4399	42.5436	205.621	34.7644	14.3234	8.78638	9.19012	9.7	77.0195	22.2466	20.635	11.9886	6.68548	2.58297	90.7085	19.1656	15.4839	12.0795	8.19705	8.17958	69.9395	18.1899	14.8279	10.3239	5.82594
8	0	2	0.777778	1	0	0	1	0	44	1.86289e+06	1.7141e+06	0.234033	0.354332	0.994015	175.248	42.3072	10.8839	6.38989	4.59173	2.67018	173.066	32.4886	10.2433	9.40052	16.6179	18.4069	175.378	38.2424	9.47635	8.46906	13.6514	16.8166	89.2456	23.8144	10.8325	7.35848	5.6546	2.7674	101.224	20.8456	8.53527	6.65292	5.92515	4.72563	74.2883	18.8606	8.7762	7.51251	9.15771
8	0	2	0.814815	1	0	0	1	0	44	2.39617e+06	970805	0.767232	-0.379332	0.786169	127.171	28.7367	10.9515	6.72246	5.64627	2.90625	116.046	23.1587	11.3821	9.91853	17.5724	20.7695	139.087	28.5163	9.43774	10.3031	18.2851	17.5611	63.6605	17.4583	11.8434	7.51996	7.19168	2.93777	67.8094	14.5782	10.1354	6.79018	7.03001	5.40403	53.8614	12.8678	8.25548	8.90111	11.2221
8	0	2	0.851852	1	0	0	1	0	44	1.54463e+06	685956	-0.084034	-0.656322	0.74878	140.543	28.1418	14.6659	8.12617	4.23462	1.19531	124.197	21.3009	12.9976	8.31908	8.63905	4.82598	173.012	29.09	10.9026	7.29676	7.70542	5.27554	61.4463	16.4028	14.5203	9.11505	6.77834	1.77943	65.5497	14.1228	11.9317	7.22803	4.80081	1.47835	57.5162	13.2736	9.32332	7.40659	4.18122
8	0	2	0.888889	1	0	0	1	0	44	1.65803e+06	1.1984e+06	0.029769	-0.13663	0.770127	89.2927	23.107	12.1905	8.34385	4.01162	1.35064	86.3379	19.3836	10.5287	9.45983	8.57109	3.68363	103.328	20.5683	8.73086	7.08512	8.91519	6.63132	53.5398	16.0188	13.2149	9.44947	5.59742	1.95929	52.1759	13.4023	10.027	7.88995	4.37711	1.54439	44.4952	12.3748	7.9724	6.64269	3.97927
8	0	2	0.925926	1	0	0	1	0	44	1.99808e+06	1.84995e+06	0.370156	0.522443	0.7653	178.532	35.7725	13.363	8.12526	4.59967	2.29081	147.186	26.089	10.6461	8.08226	9.36106	6.65356	200.123	36.2559	12.9133	8.57374	12.6779	11.3029	83.834	19.6989	13.015	9.72721	6.31636	2.4812	84.6477	17.1213	9.48256	7.94027	4.67112	2.62019	72.427	17.0354	11.2753	9.15598	7.79901
8	0	2	0.962963	1	0	0	1	0	44	1.71171e+06	1.19213e+06	0.084137	-0.127918	0.766614	229.249	34.8192	11.8729	8.81918	6.38986	5.52142	184.228	26.1402	12.9748	10.9832	34.5873	36.6177	256.198	38.6141	9.93252	11.1271	20.0296	36.7638	111.209	17.2449	12.1784	10.1607	6.6659	4.67226	111.165	15.8296	10.5951	8.76478	13.7429	10.6287	96.1658	14.932	8.24725	10.0332	14.0376
8	0	2	1	1	0	0	1	0	44	1.47323e+06	1.62097e+06	-0.154062	0.308794	0.727672	188.798	36.656	14.564	8.91132	4.21495	2.34472	195.315	29.3184	12.9274	8.91721	6.82904	4.11378	205.623	39.4487	12.0426	8.93844	8.58406	6.85204	81.8517	18.3718	14.7805	10.5635	5.54952	2.90834	105.282	17.7937	11.0799	8.5392	4.48288	2.5108	66.3212	14.853	11.1116	8.5258	4.65545
8	1	0	0.037037	0	1	0	0	0	44	2.78714e+06	1.81976e+06	0.551875	0.070693	0.881107	402.756	53.2678	9.87416	6.76087	3.54952	2.01773	308.931	37.4281	10.1742	7.27163	7.24915	6.6389	541.496	78.9019	9.67306	8.3477	13.1031	18.514	127.823	20.6083	10.606	8.43371	4.86834	2.6003	138.811	18.9575	8.56894	7.10793	4.72944	3.51109	133.034	21.6444	7.77001	7.05545	4.9491
8	1	0	0.074074	0	1	0	0	0	44	2.50401e+06	1.77661e+06	0.288227	0.035235	0.86349	149.674	30.1628	10.3281	7.67286	3.96844	1.01225	164.941	27.416	9.90021	7.46456	6.80922	3.35501	217.672	33.9231	8.53289	8.93547	11.4169	12.7259	72.4124	19.0159	11.27	9.72036	6.84829	1.78449	82.6985	17.31	9.14585	7.69231	4.51294	1.51019	65.3831	14.4718	7.99531	7.10111	4.39724
8	1	0	0.111111	0	1	0	0	0	44	2.41972e+06	1.66494e+06	0.22347	-0.06902	0.873307	136.838	26.7252	11.3271	6.13526	2.77717	0.89365	141.153	25.8584	10.2196	6.23098	4.32953	3.13478	177.764	24.7593	9.44567	7.81921	9.6703	10.2199	69.2862	19.4824	11.5066	7.05953	4.42344	1.58155	73.0211	17.1501	8.69132	6.13468	3.04456	1.22308	59.9478	14.8167	8.26057	5.34417	3.01063
8	1	0	0.148148	0	1	0	0	0	44	1.98077e+06	1.36623e+06	-0.195843	-0.360796	0.929901	118.874	23.7418	9.24325	6.26367	3.91114	0.99205	102.891	18.3872	7.14122	6.88617	6.3344	3.37759	167.363	27.3139	8.00373	7.59133	14.1977	13.6421	60.0025	15.1973	11.1873	7.7855	7.42649	1.65744	55.5656	12.3461	8.05073	6.22157	4.51144	1.16069	59.2872	12.5105	8.02552	5.84732	4.09154
8	1	0	0.185185	0	1	0	0	0	44	2.12663e+06	2.31196e+06	-0.030591	0.59303	0.873441	278.97	42.0432	11.477	6.72902	3.96858	1.26838	229.404	32.478	10.0257	5.85554	7.13681	4.70244	313.334	42.5921	9.02512	8.24392	16.1596	15.6195	111.818	22.6792	12.0291	8.02844	6.73109	1.81503	114.909	19.8287	9.80146	6.00747	4.20319	1.78853	103.067	17.6833	7.32454	6.3148	4.23501
8	1	0	0.222222	0	1	0	0	0	44	1.8701e+06	1.70703e+06	-0.267651	-0.004133	0.849935	225.17	27.1048	12.3901	7.51583	3.39016	1.14746	154.139	20.0676	9.20251	7.56893	7.14447	5.66456	324.597	34.8292	11.0487	8.67417	16.1796	17.2514	92.1966	14.3533	12.0904	9.25793	5.52722	1.73242	78.6731	11.8479	8.61622	6.76114	4.04319	1.76681	97.3756	12.7232	9.4181	6.64725	3.70083
8	1	0	0.259259	0	1	0	0	0	44	1.7046e+06	1.44749e+06	-0.413673	-0.255967	0.831216	306.006	28.3066	11.3061	8.79754	3.94366	1.28138	235.272	22.1192	8.67184	8.63887	9.36266	6.71416	385.852	30.8749	9.01593	8.4608	16.6321	16.5282	112.593	18.7293	13.6829	10.9646	6.42964	1.9102	112.347	15.949	9.20443	8.31932	5.04612	2.21852	108.253	13.3431	8.94647	6.92839	4.29105
8	1	0	0.296296	0	1	0	0	0	44	1.65266e+06	1.3273e+06	-0.446117	-0.368535	0.821166	99.1273	26.8614	12.5716	6.57103	3.22756	1.11107	100.714	24.3222	8.96728	7.42062	6.61524	4.20948	116.914	23.9754	10.8682	8.00909	13.0915	13.6586	61.2945	20.7836	13.4788	7.86703	5.59296	1.65188	60.986	17.2622	8.7374	6.19523	3.6068	1.31684	46.5374	15.0706	10.7399	6.55965	3.76988
8	1	0	0.333333	0	1	0	0	0	44	1.68845e+06	1.567e+06	-0.390827	-0.121239	0.813715	111.03	23.9095	9.40749	5.3876	3.30119	1.02905	115.527	21.5063	7.7285	5.68375	6.25207	3.61436	141.034	23.3749	8.84106	7.16082	11.2749	11.9401	60.2248	18.4871	10.2534	6.31955	5.69971	1.63837	64.3155	16.3285	7.33249	4.69941	3.75273	1.15625	52.9317	12.1629	6.90019	4.97998	3.60984
8	1	0	0.37037	0	1	0	0	0	44	2.49191e+06	1.40644e+06	0.43221	-0.274632	0.84701	107.552	28.2195	10.8614	7.44578	3.53551	1.15931	133.135	22.6102	8.92673	8.25347	5.1846	3.25848	132.086	31.0609	9.87625	8.18286	14.3356	12.5122	64.124	19.5096	11.5036	8.59201	4.94178	1.82012	71.5818	15.8488	7.80481	6.60812	3.43174	1.29873	50.6957	15.9457	8.81637	6.69661	3.34788
8	1	0	0.407407	0	1	0	0	0	44	1.83758e+06	1.1157e+06	-0.202577	-0.557988	0.859638	131.596	24.7481	10.1318	6.4623	4.35369	1.1181	152.196	22.5398	8.16091	6.20749	7.61099	4.16981	156.557	24.177	7.87519	7.95624	15.0824	13.3125	76.5342	18.913	11.2613	7.38972	8.1403	1.647	83.1366	16.621	8.12305	5.7808	4.52126	1.21213	59.8424	13.4508	7.44411	5.52599	4.0682
8	1	0	0.444444	0	1	0	0	0	44	2.115e+06	1.91734e+06	0.094322	0.251344	0.843355	133.244	19.969	11.952	8.02051	3.94022	1.24682	128.588	15.5993	8.49894	7.37304	8.11913	4.48968	190.977	24.1035	9.90445	9.3318	15.0092	14.2826	72.5594	15.4628	13.7596	8.69439	8.21362	1.75766	70.8828	11.5174	8.60989	6.6706	4.36688	1.38215	68.2384	12.0731	10.1359	6.62793	4.32157
8	1	0	0.481481	0	1	0	0	0	44	1.88523e+06	1.23192e+06	-0.116044	-0.425985	0.788094	183.959	20.1839	10.0474	7.54429	4.20996	1.21837	171.583	16.7563	8.9762	7.10201	9.18801	5.21484	195.959	20.7261	7.72509	9.21799	15.6846	15.5123	97.9617	15.5934	11.2028	9.29462	7.20591	1.76268	100.217	12.6626	8.55496	6.61237	4.90707	1.61513	76.8914	11.2715	7.48241	6.40847	4.117
8	1	0	0.518519	0	1	0	0	0	44	2.26218e+06	2.18358e+06	0.280494	0.532854	0.820339	198.03	30.8815	9.99696	6.1981	3.35182	1.86873	170.687	23.5623	8.46933	6.67041	9.4229	8.01189	276.875	37.9602	8.84599	7.65296	16.6584	18.1159	83.4013	14.7013	10.7533	7.73085	4.75448	2.24763	87.5959	13.1068	7.87534	6.17656	5.46355	3.82364	82.0998	12.9629	7.69804	6.0093	4.66884
8	1	0	0.555556	0	1	0	0	0	44	1.47596e+06	1.77005e+06	-0.486159	0.12657	0.846451	145.948	19.2586	10.3693	7.98512	3.79304	1.26405	139.211	15.7815	7.23218	10.1091	8.91732	8.04163	173.95	19.477	8.04437	8.81096	16.5053	16.0967	72.2368	14.1136	11.9576	9.76698	7.25224	1.69666	75.6672	11.6891	7.64286	8.95071	5.30497	4.69327	57.9912	10.3133	8.58915	7.00905	4.54146
8	1	0	0.592593	0	1	0	0	0	44	2.39635e+06	1.84458e+06	0.453695	0.208871	0.821952	455.335	72.7282	15.078	6.65873	3.45847	2.90834	280.477	46.8758	12.7087	8.56604	9.61524	7.5187	585.469	87.1867	15.1941	10.891	17.1117	26.0152	186.546	26.7412	14.0639	7.70769	4.80488	2.87956	156.321	24.7261	10.9956	7.26801	4.55191	3.95081	190.254	25.373	10.9615	7.61992	8.28524
8	1	0	0.62963	0	1	0	0	0	44	2.47794e+06	1.98628e+06	0.554766	0.358268	0.804105	391.801	56.3373	14.8551	7.21993	3.31507	1.91284	279.179	40.6943	13.362	7.97633	6.16915	4.42023	568.601	73.3797	12.0766	8.42385	10.8867	11.917	121.863	22.3549	14.1036	8.51101	4.5328	2.38963	122.449	20.7108	11.6254	7.16373	3.62364	2.24112	138.182	20.8845	9.62369	6.25241	4.6471
8	1	0	0.666667	0	1	0	0	0	44	1.69825e+06	1.84994e+06	-0.205346	0.229131	0.8343	259.899	49.7871	16.24	6.67709	3.62249	1.78942	200.493	37.619	12.8115	7.33145	7.47166	5.46767	349.17	60.3687	12.5471	7.80878	17.5741	22.2029	100.746	20.9547	17.7083	8.29859	4.67384	2.10465	98.6937	20.2241	12.6987	6.67045	4.42069	2.53973	100.025	18.5995	11.27	6.58683	5.3345
8	1	0	0.703704	0	1	0	0	0	44	1.60113e+06	1.5828e+06	-0.282945	-0.030529	0.83764	267.521	47.7464	13.7682	7.44182	3.57981	1.09905	227.183	35.5294	10.3492	7.84029	7.01011	3.78988	312.843	49.5315	12.5128	8.10513	12.1162	11.3185	115.272	24.2351	14.7294	10.3516	5.68166	1.76637	115.941	21.4459	9.62987	8.05097	4.16972	1.32165	101.595	20.7923	11.5653	7.72029	3.35839
8	1	0	0.740741	0	1	0	0	0	44	1.45971e+06	1.20211e+06	-0.404851	-0.40371	0.83807	156.592	20.9523	15.4968	10.4537	3.57786	1.16132	148.181	17.5538	12.3228	10.1218	7.61645	3.80739	247.237	25.9877	12.0765	11.0616	12.5617	11.3535	76.0811	14.5694	18.294	13.178	5.88167	1.8176	75.0945	12.6741	12.0185	9.39694	4.3534	1.31685	76.9977	12.3532	13.1732	10.0936	3.73142
8	1	0	0.777778	0	1	0	0	0	44	1.94765e+06	1.3456e+06	0.102706	-0.253205	0.88671	178.213	32.305	12.1199	6.89675	3.61126	1.21707	195.146	29.6783	10.8427	7.16063	6.49631	3.64701	203.805	32.6616	9.50051	8.08678	11.7777	11.5028	84.8355	17.6186	12.679	8.26747	5.4947	1.83161	95.9145	16.8653	9.86994	6.99414	3.67383	1.47955	68.7608	13.007	8.03349	5.94662	4.80972
8	1	0	0.814815	0	1	0	0	0	44	2.1965e+06	2.25483e+06	0.370971	0.664054	0.837104	211.733	42.5987	10.3558	5.63764	4.08703	2.11168	226.163	33.8861	9.54309	6.05192	6.09647	3.76463	219.131	46.7246	9.19885	7.28149	10.036	11.0343	82.9514	17.7104	9.69313	6.59807	5.27426	2.66434	104.329	16.8605	8.03256	5.07924	3.55486	1.84944	66.4492	15.2898	6.83269	7.6551	16.4477
8	1	0	0.851852	0	1	0	0	0	44	1.39856e+06	1.27173e+06	-0.407414	-0.311742	0.857407	152.697	35.4542	9.71215	6.91985	2.87938	1.26208	153.591	30.3798	8.70432	6.52306	4.88098	2.72172	200.804	37.0406	8.11397	6.16828	3.76669	2.64502	73.9736	18.4807	9.34139	8.49629	4.2405	1.88089	81.4043	18.2293	7.13552	6.31248	3.14333	1.40106	64.961	15.2349	6.55782	6.96015	3.4715
8	1	0	0.888889	0	1	0	0	0	44	1.94046e+06	1.5062e+06	0.154091	-0.070215	0.901468	269.754	40.6231	12.4735	7.85441	3.27509	1.30647	199.406	32.3322	10.9392	7.61767	5.94689	3.33443	345.778	46.1651	10.602	7.01098	5.78068	4.2113	101.706	19.2681	12.1427	9.36974	5.14194	1.97283	97.1422	18.2266	9.79726	7.36616	3.65378	1.68782	101.682	16.3392	8.80933	7.53211	3.5505
8	1	0	0.925926	0	1	0	0	0	44	1.96761e+06	1.34787e+06	0.200609	-0.220272	0.82912	277.517	47.9781	12.4202	6.70215	3.06349	1.33924	204.042	40.9957	10.7772	6.84673	6.06959	4.15056	398.755	53.2854	11.126	6.33391	5.76331	5.48096	114.343	22.6016	12.4971	8.01457	4.83425	1.85305	106.236	21.657	9.65852	6.92406	3.59211	1.81411	118.01	19.8389	8.91401	6.3216	3.31563
8	1	0	0.962963	0	1	0	0	0	44	1.74926e+06	1.67235e+06	0.001805	0.11155	0.845496	265.86	36.1587	12.9193	8.02079	3.67624	1.83843	228.349	30.4407	11.7314	8.70145	8.49844	7.55927	327.183	39.1429	9.48479	8.7165	10.9601	12.9856	101.751	18.6195	14.0615	9.51592	5.38626	2.19847	108.894	17.3665	10.5497	7.717	4.54286	2.66475	97.4678	15.2072	9.13861	7.85803	5.21941
8	1	0	1	0	1	0	0	0	44	1.55695e+06	1.53433e+06	-0.170998	-0.018894	0.839756	160.122	20.8924	12.847	9.58678	4.41609	1.2972	95.387	13.6335	9.40375	8.69493	8.10945	4.38495	226.482	25.613	9.94114	8.20426	11.1809	15.3826	78.9157	16.4017	14.0736	12.2823	6.98359	1.84941	61.5431	11.1479	9.78658	9.26971	4.65586	1.47703	84.8856	14.593	9.92192	9.27257	5.04449
8	1	1	0.037037	0	0	1	0	0	44	1.76803e+06	1.29565e+06	-0.071136	-0.282062	1.07289	234.697	48.4996	11.6941	8.00336	3.56086	1.25388	174.858	33.5694	10.1812	9.00805	8.61264	6.69784	384.563	61.6496	10.7224	8.63882	10.4427	11.8643	85.1221	24.3702	12.696	10.3186	5.42997	1.97858	84.2807	20.7645	8.73664	9.04748	5.67681	3.71359	93.305	21.8934	8.43904	7.93203	4.30995
8	1	1	0.074074	0	0	1	0	0	44	1.76931e+06	1.52107e+06	-0.067466	-0.052456	1.07201	266.591	29.0859	12.4817	7.72235	2.95631	1.13721	204.295	21.3404	10.993	8.64119	6.53377	5.52047	364.5	35.5071	9.19778	7.76214	10.5286	8.85192	100.41	16.5382	14.1045	9.30302	4.78124	1.65249	106.32	13.7041	10.6095	7.9433	4.38258	2.59215	96.5123	13.9106	8.7571	6.85757	3.26448
8	1	1	0.111111	0	0	1	0	0	44	1.83932e+06	2.21643e+06	0.004941	0.647059	1.07323	144.712	25.9164	9.89706	9.0207	3.74278	2.37764	117.506	19.4855	10.2019	11.2055	11.7045	14.9375	230.577	32.8984	9.4597	10.5863	12.6637	14.5606	61.8841	13.4935	11.2316	10.2866	6.22514	2.57056	58.876	12.2403	9.48817	10.5968	8.57657	7.10241	62.8576	11.9684	9.39128	9.43068	6.29562
8	1	1	0.148148	0	0	1	0	0	44	1.20923e+06	1.15854e+06	-0.622411	-0.408404	1.24082	194.369	31.6301	10.557	6.62271	3.65408	1.08251	151.692	23.308	8.05528	6.60765	8.42925	5.51779	242.774	37.6808	9.04314	6.9396	10.1021	9.03707	74.5123	16.9367	11.4983	8.44191	5.71578	1.67211	80.9006	14.6913	7.85662	6.82574	4.57033	1.81591	66.3581	13.868	7.92821	5.94159	3.85996
8	1	1	0.185185	0	0	1	0	0	44	1.61635e+06	1.53019e+06	-0.212705	-0.033574	1.3367	300.075	51.9612	13.2103	6.18066	3.28856	1.83972	248.751	40.0002	11.4547	7.73584	8.07636	7.99536	341.042	59.696	12.1079	7.11738	13.3894	13.4853	127.095	19.0041	11.5664	7.11113	4.49146	2.29644	128.994	19.3833	9.4126	6.2312	3.92979	3.12791	110.36	17.3418	8.43424	5.83231	3.99197
8	1	1	0.222222	0	0	1	0	0	44	1.55594e+06	1.18779e+06	-0.270812	-0.371399	1.29759	124.343	27.5007	9.86456	6.56678	2.80883	0.9963	102.853	20.333	8.66067	7.23527	8.46027	5.12264	204.781	33.5132	7.33568	7.18859	12.5577	9.0559	48.33	16.6495	11.7398	7.88672	4.60143	1.60677	47.8842	13.7068	8.56696	6.59738	3.48202	1.80551	52.0382	13.2207	7.74582	5.60598	2.85552
8	1	1	0.259259	0	0	1	0	0	44	1.78067e+06	1.49875e+06	-0.042951	-0.059965	1.65333	252.846	31.8035	16.4588	8.83063	3.32233	1.14071	208.324	23.8984	12.054	9.9711	8.50905	5.99351	296.719	32.8719	11.897	8.29308	12.9209	9.92592	105.393	20.6927	19.6147	11.3785	5.51339	1.72794	111.584	16.1488	12.0796	9.2528	4.19419	2.08433	88.6762	15.8232	11.839	8.06481	3.59197
8	1	1	0.296296	0	0	1	0	0	44	1.82867e+06	1.24147e+06	0.011157	-0.331895	3.46007	177.736	23.1457	15.453	10.5882	3.91605	1.10432	136.93	17.6821	11.094	9.5669	10.0344	6.38213	367.003	24.7363	11.5411	10.7395	12.3932	10.2462	73.0486	17.5115	16.24	12.9028	6.49863	1.70308	66.0956	13.4645	10.2715	9.50755	4.66226	2.0127	91.7854	14.009	11.5048	9.84879	4.32342
8	1	1	0.333333	0	0	1	0	0	44	2.42495e+06	1.86063e+06	0.60591	0.311265	1.55702	354.101	38.043	10.6244	6.85134	3.88486	1.6506	255.417	28.0934	11.2008	9.10875	12.6681	13.0093	505.162	49.492	9.53098	7.33727	14.7911	13.5116	128.188	17.8664	11.5803	8.89618	5.65855	1.9608	125.319	16.2009	10.3316	7.65263	6.42303	6.83913	129.7	15.7255	7.87744	6.23077	4.14669
8	1	1	0.37037	0	0	1	0	0	44	2.1527e+06	1.7843e+06	0.336055	0.239067	1.56114	238.304	29.9803	19.2449	9.05894	4.08224	1.10697	177.539	22.7855	15.0559	9.36981	9.98064	6.58413	304.206	30.5398	13.9089	9.5146	11.3961	9.55138	96.0534	19.1749	22.4594	11.139	6.64569	1.68854	93.152	16.1514	16.3305	8.4143	4.82951	2.02997	92.1957	14.7159	13.1573	8.59747	4.03331
8	1	1	0.407407	0	0	1	0	0	44	1.84186e+06	1.37532e+06	0.026998	-0.162664	1.26549	228.776	28.5905	12.1121	8.22921	3.35042	1.15556	234.635	27.3413	10.5151	8.40865	10.2523	7.34965	283.935	27.6711	9.20653	8.68006	13.2153	11.4167	95.2999	18.3029	13.8816	10.2577	4.95139	1.70496	110.91	17.0596	10.0686	7.82974	4.59658	2.44026	85.1076	12.9913	9.15507	7.31575	3.49167
8	1	1	0.444444	0	0	1	0	0	44	1.88263e+06	1.35471e+06	0.070496	-0.180792	1.42816	192.025	28.5405	8.85109	6.0507	3.84538	1.50003	142.466	21.3754	7.49268	6.47664	10.7926	7.73228	247.863	30.4872	7.13729	8.61304	12.9071	12.3268	85.8725	17.2513	9.94316	7.42309	6.06771	1.84874	78.2258	15.372	6.93707	5.98673	4.59849	2.60915	77.5803	12.0965	6.58191	5.96716	3.9013
8	1	1	0.481481	0	0	1	0	0	44	1.53587e+06	1.43204e+06	-0.273742	-0.099967	1.49323	215	28.8099	16.2523	7.42283	3.7006	1.20906	171.537	23.8362	13.0226	7.86841	9.4467	7.98307	229.597	27.7965	11.2834	7.50547	12.6898	11.8953	97.1596	18.5421	16.7424	8.93135	6.20117	1.78147	96.6468	16.0319	12.4271	6.9951	5.04877	2.13162	81.4985	13.724	10.5056	6.56773	3.73405
8	1	1	0.518519	0	0	1	0	0	44	1.92435e+06	1.67097e+06	0.117189	0.142825	1.52252	145.135	22.7175	10.7621	7.38339	3.28678	1.38906	141.715	19.7564	8.72204	8.22238	8.42311	6.0362	248.079	28.0998	9.32502	8.71783	12.2183	11.8522	60.8939	14.3277	11.0213	8.31261	5.78529	1.8093	68.475	12.9376	8.22581	6.75583	4.44187	1.99743	65.8016	11.6283	8.64355	6.90972	3.70864
8	1	1	0.555556	0	0	1	0	0	44	1.95188e+06	1.34877e+06	0.147328	-0.176321	1.63076	223.244	41.9681	11.0328	5.99577	3.47509	1.24763	169.413	29.8011	10.0507	7.49331	9.54306	5.68309	320.866	51.2954	9.42391	7.19653	12.2424	10.5431	88.4844	19.7563	11.5847	7.09928	6.22549	1.82552	82.2512	16.6501	9.2132	5.84145	4.23902	1.90808	95.2467	18.3679	7.7412	5.21684	3.60647
8	1	1	0.592593	0	0	1	0	0	44	1.81779e+06	1.45911e+06	0.015302	-0.060168	1.47259	246.338	37.5204	11.5511	7.10261	3.28932	1.18857	176.463	24.6606	9.08247	8.15427	7.88063	5.38443	357.991	46.6157	9.28129	8.38343	12.7787	11.7928	95.1861	19.6701	13.2444	8.78038	4.76544	1.56653	90.8944	16.6154	9.10631	6.86018	3.54583	1.71658	96.9101	17.0997	9.22097	6.2334	3.22016
8	1	1	0.62963	0	0	1	0	0	44	1.62886e+06	1.52416e+06	-0.16856	-0.004455	2.76976	169.013	40.8894	11.7898	5.28737	3.01051	1.19814	135.597	31.2814	9.69346	6.23634	5.689	4.17076	222.214	46.9547	10.3676	6.06239	9.6148	10.4299	78.3724	20.4877	12.3718	6.62924	4.45442	1.62308	72.8582	18.5243	9.38726	5.11543	3.22968	1.51205	72.2173	16.6967	7.93161	4.58901	2.96971
8	1	1	0.666667	0	0	1	0	0	44	2.04831e+06	1.85888e+06	0.252362	0.339055	2.32709	155.625	30.9897	12.7447	7.19977	3.85554	1.57749	132.881	23.7	11.3025	7.75738	9.13543	7.95036	233.844	35.0142	10.6746	7.17994	13.3799	11.464	73.1241	19.5018	12.6848	9.0518	5.3988	1.97131	67.8899	15.8594	9.87272	7.61628	4.39511	2.37938	73.3759	15.5539	8.89928	6.29397	4.0975
8	1	1	0.703704	0	0	1	0	0	44	1.91849e+06	1.5201e+06	0.128538	-0.013737	4.07232	222.912	33.7006	12.3665	7.95125	3.93812	1.63131	179.083	23.0477	10.5607	8.98052	9.52713	6.1922	305.583	43.9188	10.9524	9.20375	9.76907	8.9072	76.9652	18.73	12.7248	8.80166	5.151	1.86688	81.5525	15.5733	10.182	7.84444	4.33419	2.14461	79.9524	16.0151	9.12099	6.741	3.33813
8	1	1	0.740741	0	0	1	0	0	44	1.56782e+06	1.32786e+06	-0.224796	-0.176313	1.62572	363.02	50.4562	10.8065	6.90503	3.75237	1.50008	272.824	35.9761	8.89959	7.24607	8.69075	6.76134	385.334	51.2269	9.12751	6.51525	8.99214	7.86946	142.25	22.6112	11.7339	8.46993	5.17668	2.03122	140.643	20.232	8.5417	6.72527	4.33818	2.2527	123.283	18.0683	7.86857	5.71279	3.33311
8	1	1	0.777778	0	0	1	0	0	44	1.4515e+06	1.29547e+06	-0.337441	-0.210987	2.24572	140.728	16.5107	16.0047	8.54621	3.74414	1.10983	97.4225	13.939	12.2568	9.10021	10.0758	6.28552	169.252	17.7685	11.0106	7.13968	10.8348	7.58693	68.7078	10.6738	16.7041	10.3879	5.22629	1.49758	58.0458	8.67148	12.0054	8.38644	4.5834	1.71199	60.7139	8.61314	11.1116	7.4155	3.02073
8	1	1	0.814815	0	0	1	0	0	44	1.73714e+06	1.83664e+06	-0.043397	0.303976	5.16184	233.643	41.6642	12.1087	7.82378	3.5096	1.57862	173.507	26.921	10.0661	8.13529	6.96676	5.24104	292.629	50.4901	10.0392	8.42746	7.50016	6.82263	92.6374	20.2023	13.6745	9.13667	5.02529	2.10783	89.0572	16.3777	9.58399	7.46983	4.23274	2.14829	83.2704	17.1891	8.79348	6.40782	3.22928
8	1	1	0.851852	0	0	1	0	0	44	1.34787e+06	1.19293e+06	-0.431987	-0.326948	4.3353	164.729	28.5064	10.36	7.77697	3.90763	1.09219	170.578	26.131	8.83117	8.81575	9.98846	6.40803	167.396	25.2121	8.79003	8.0141	7.18699	6.08551	76.6307	19.4119	11.1476	9.33434	6.30029	1.74183	85.8371	16.9634	7.97679	7.56708	4.99037	1.73857	58.9114	13.1183	8.11819	6.98847	3.44322
8	1	1	0.888889	0	0	1	0	0	44	2.03371e+06	1.31006e+06	0.251242	-0.180369	1.90878	167.128	27.6869	12.6876	7.81469	3.79482	1.26018	165.641	24.9117	9.95287	9.02238	10.3476	7.74166	214.843	28.9023	9.85516	7.67903	9.1524	6.94428	62.1934	17.6397	15.1241	9.2534	6.15097	1.69851	76.4531	15.8824	10.0139	7.83392	4.63227	2.07334	55.7794	13.517	11.0389	7.29193	3.45959
8	1	1	0.925926	0	0	1	0	0	44	1.92871e+06	1.4157e+06	0.148231	-0.068527	1.71352	159.902	28.4605	12.9398	6.62718	4.08173	1.60957	163.839	24.2677	9.85801	8.01072	9.30317	7.45225	233.308	31.2676	10.5569	7.31826	10.0521	9.65313	67.1481	18.1993	14.5518	8.28145	6.24017	2.10252	73.4225	14.9559	9.70697	7.06072	4.44727	2.33732	63.8935	14.8608	10.2634	5.69248	4.00349
8	1	1	0.962963	0	0	1	0	0	44	2.0673e+06	2.00268e+06	0.288823	0.524588	1.52588	193.562	22.8639	12.5362	7.56482	4.45045	2.58443	174.454	18.4994	12.7578	8.19164	8.28315	7.12579	275.963	25.7743	9.88804	8.27848	7.2967	13.5028	88.1297	16.762	13.4984	9.45429	6.01069	2.83965	90.0677	13.7622	10.3892	7.35479	5.32601	3.07995	87.1214	13.1897	9.45543	7.95873	6.15786
8	1	1	1	0	0	1	0	0	44	1.6378e+06	1.49187e+06	-0.138816	0.020609	1.27069	139.676	14.8272	8.62775	5.94693	3.59354	1.46801	103.647	13.202	7.33627	6.14857	7.61777	4.79447	195.766	15.2703	7.3741	6.28988	7.46618	5.62567	57.5085	12.3928	10.0727	7.50696	5.17667	2.10629	54.8827	9.9776	7.3285	5.92315	4.08724	2.45552	56.9571	9.21417	7.04717	5.9468	3.55865
8	1	2	0.037037	0	0	0	1	0	44	1.30821e+06	1.18664e+06	-0.639369	-0.520482	0.884974	154.071	31.42	10.5158	6.90857	3.13378	1.42449	118.334	22.3231	8.63362	6.85986	5.29609	3.45829	225.6	36.575	9.36221	6.95934	7.83364	8.37448	62.9922	16.2197	12.1727	7.90793	4.57338	2.04507	58.9252	14.2691	8.43872	5.84141	3.68698	2.09393	66.4616	13.1872	8.1149	5.81681	3.97724
8	1	2	0.074074	0	0	0	1	0	44	2.33651e+06	2.17194e+06	0.39015	0.469389	0.869219	331.966	44.7015	13.7452	6.61847	3.61385	1.8139	265.989	33.493	10.2086	7.18152	4.9815	3.71394	459.544	52.7744	12.0721	7.08558	9.0879	9.4436	126.106	20.4618	13.7583	8.57401	4.97556	2.47279	136.343	19.23	9.57285	6.76832	3.91272	2.34254	120.347	18.1217	10.6518	6.08038	4.00626
8	1	2	0.111111	0	0	0	1	0	44	1.97413e+06	1.88895e+06	0.028935	0.191267	0.825846	233.266	40.6898	10.2267	5.74143	3.56778	1.19522	197.085	34.4802	8.83504	6.61281	5.84042	4.01292	320.607	44.8567	8.84907	6.36163	9.67291	9.29862	101.805	21.0356	11.0625	7.93288	5.50837	1.78904	101.797	19.8701	7.78291	6.5596	3.67076	1.74893	99.7781	17.8561	8.30803	5.67646	3.45462
8	1	2	0.148148	0	0	0	1	0	44	1.7529e+06	1.42802e+06	-0.190973	-0.265607	0.859382	335.846	44.1503	12.208	7.20658	3.30688	1.24082	293.923	39.6446	11.6468	7.23523	5.71885	3.0003	394.541	44.1297	9.19982	7.98075	7.60591	7.15129	137.707	20.8181	13.0786	8.06248	4.71326	1.74021	147.319	20.8549	11.0794	6.66456	3.53942	1.45378	122.566	16.0573	8.22986	6.27806	3.01905
8	1	2	0.185185	0	0	0	1	0	44	1.86995e+06	1.65724e+06	-0.072619	-0.032221	0.883115	175.47	30.2863	13.7	6.89163	3.67789	1.72451	163.307	25.2085	11.9072	6.8826	5.72161	4.09883	279.09	35.8991	10.9621	7.44887	10.4058	9.77353	67.1173	15.744	14.8196	8.47194	4.93269	2.32676	73.7842	14.0701	11.1134	6.77644	4.1181	2.59339	74.8815	13.3457	10.0835	6.95917	3.76188
8	1	2	0.222222	0	0	0	1	0	44	1.79316e+06	1.54863e+06	-0.148279	-0.135806	0.824124	226.52	28.2039	11.9498	7.88215	3.72216	1.17461	182.921	20.9157	8.40503	7.67122	5.45534	2.84862	294.545	33.16	8.55281	7.22532	10.2323	8.00359	91.6256	17.295	13.2894	9.31022	6.38382	1.91865	90.4735	14.2258	8.19466	7.33427	4.14644	1.42968	86.127	13.8959	7.89357	6.26696	4.04414
8	1	2	0.259259	0	0	0	1	0	44	1.32875e+06	1.13414e+06	-0.611405	-0.546076	0.842594	154.113	29.0927	11.5478	5.35516	3.30143	1.19755	181.079	24.1314	8.7189	5.39558	4.98406	3.05246	183.204	33.5907	8.7704	6.38869	8.56154	6.43167	72.1734	15.3846	13.2512	6.83588	5.85882	1.86122	88.9955	13.5676	8.99428	4.92926	3.51548	1.64404	60.2536	12.7057	8.12492	4.97894	3.39912
8	1	2	0.296296	0	0	0	1	0	44	2.18651e+06	1.83711e+06	0.247618	0.161247	0.847964	319.989	35.9179	12.6868	6.98842	3.07591	1.34843	231.213	28.2251	10.6415	7.23094	6.90864	5.03998	457.116	45.7931	9.35101	6.99517	8.9537	8.49713	116.162	16.2887	13.5136	9.24785	4.50722	1.8856	115.279	15.1825	10.152	7.13049	3.8673	1.92116	119.776	15.2407	8.30455	6.57024	3.13225
8	1	2	0.333333	0	0	0	1	0	44	1.42809e+06	1.3772e+06	-0.50951	-0.294435	0.865286	166.875	19.7434	8.02171	6.61381	3.8774	1.17579	124.31	16.2402	6.76128	5.94679	4.23818	1.82256	203.424	19.0196	6.03533	6.65315	4.91187	3.28108	70.0298	13.8577	8.8215	8.07734	6.3976	1.97132	65.7405	11.0028	6.94872	6.03023	4.10556	1.41056	62.9162	10.1915	6.28548	5.45951	3.81404
8	1	2	0.37037	0	0	0	1	0	44	2.04853e+06	1.34966e+06	0.112209	-0.317682	0.877514	242.812	47.7668	12.021	8.537	3.63589	1.34895	158.062	32.358	9.87541	7.35128	4.19863	1.95474	333.647	59.6682	10.5658	6.3492	4.61723	3.2261	96.9008	19.87	12.2189	10.3448	5.46484	2.02681	84.7468	17.6066	9.74459	7.3181	3.42009	1.40765	99.4049	18.9555	8.89697	6.77424	3.23135
8	1	2	0.407407	0	0	0	1	0	44	2.18522e+06	1.74414e+06	0.250073	0.08155	0.844685	151.915	21.4183	17.8228	8.41104	3.87686	0.89065	165.936	19.4501	14.6192	7.71083	4.87768	1.71236	180.212	18.431	11.4569	6.71229	4.77371	2.82258	57.6156	16.7435	21.7764	10.4637	6.23382	1.38541	70.6509	13.7115	15.5587	7.56126	3.70346	0.92928	50.546	11.9984	12.789	7.79896	3.52576
8	1	2	0.444444	0	0	0	1	0	44	1.86657e+06	1.71556e+06	-0.067331	0.057443	0.838589	159.446	23.7796	13.9719	7.37982	3.73768	1.0623	158.724	23.0983	11.077	6.78368	5.15799	2.40274	179.238	20.7689	9.59861	6.40903	4.75883	2.92804	63.839	16.8884	14.8585	8.9343	6.32056	1.60411	74.6517	15.3152	10.0058	6.5441	3.73136	1.17735	51.9001	11.907	9.36731	7.13571	3.77277
[truncated: 3,903 more rows]
[truncated: 165 more columns]
